# Supplementary material for: Human cardiac cis -regulatory elements, their cognate transcription factors, and regulatory DNA sequence variants
Source: HighWire-hosted journal article supplement (doi:10.1101/gr.234633.118), 2018-08-23
Supplement: Supplemental_Data_S2.xlsx [file Supplemental_Data_S2.xlsx]

## Sheet: generic deltaSVM
chr	start	end	RSID	ref allele	alt allele	freq	deltaSVM	ref SVM score	alt SVM score
chr1	10176	10177	rs367896724	A	AC	0.4056	1.00374	-0.609504	0.394238
chr1	10351	10352	rs555500075	T	TA	0.4264	1.21569	-0.82032	0.395373
chr1	237504	237505	rs367639380	T	C	0.0229	1.14534	-1.70737	-0.562022
chr1	564597	564598	rs6594028	A	G	0.1074	1.65007	-1.32474	0.325329
chr1	565507	565508	rs9283150	G	A	0.0586	0.969026	-2.21721	-1.24818
chr1	566869	566870	rs528621909	T	C	0.0179	0.932793	-2.15705	-1.22426
chr1	567695	567696	rs367588992	C	T	0.0258	-0.972908	-0.690314	-1.66322
chr1	568213	568214	rs373437560	C	T	0.1272	-1.17458	-0.814574	-1.98915
chr1	568255	568256	rs4098612	C	T	0.165	-1.03819	-0.983461	-2.02165
chr1	568450	568451	rs78032279	C	T	0.1551	-1.08986	-1.02205	-2.11191
chr1	569203	569204	rs112660509	T	C	0.3867	1.078	-1.71127	-0.633268
chr1	725195	725196	rs377099097	G	A	0.0437	-1.17874	-0.117083	-1.29583
chr1	743020	743021	rs3964475	T	C	0.2604	1.18741	-2.47652	-1.28911
chr1	752477	752478	rs146277091	G	A	0.0427	-1.1393	0.140879	-0.998417
chr1	821925	821926	rs35660652	C	G	0.0755	-1.461	-1.05569	-2.51669
chr1	841084	841085	rs1574243	C	G	0.2276	-0.97966	-1.33489	-2.31455
chr1	842361	842362	rs28540380	C	T	0.2237	-2.83642	-1.43571	-4.27212
chr1	842387	842388	rs571161612	T	TCCGCAGGA	0.0249	1.19143	-2.02227	-0.830848
chr1	856435	856436	rs34105146	TG	T	0.1789	0.955903	-2.07951	-1.12361
chr1	856556	856557	rs147866846	A	C	0.0189	-0.963018	-1.33339	-2.29641
chr1	860787	860788	rs537118000	TTGGCGC	T	0.9761	-0.935874	-0.304963	-1.24084
chr1	860853	860854	rs57816555	T	C	0.9871	1.3203	-1.33709	-0.016783
chr1	880237	880238	rs3748592	A	G	0.9523	-0.9123	-0.871366	-1.78367
chr1	892459	892460	rs41285802	G	C	0.0378	-2.68595	1.51456	-1.17139
chr1	895754	895755	rs113491766	A	AG	0.9016	1.32913	-2.32284	-0.99371
chr1	901558	901559	rs13303160	G	A	0.9056	2.13704	-1.00471	1.13233
chr1	902068	902069	rs116147894	T	C	0.0358	-0.941716	-2.58579	-3.52751
chr1	917491	917492	rs28434575	C	T	0.163	0.855641	-1.63656	-0.780915
chr1	919854	919855	rs116781904	G	A	0.1183	-1.73	-1.71012	-3.44011
chr1	935931	935932	rs35310704	C	G	0.0467	-0.943975	-1.23789	-2.18186
chr1	936209	936210	rs3121569	C	A	0.7903	-0.94161	-0.499503	-1.44111
chr1	941538	941539	rs9778087	C	T	0.3877	-1.48618	-0.524962	-2.01114
chr1	941794	941795	rs145588482	TGGCAGCTC	T	0.0109	-1.23788	-0.731496	-1.96937
chr1	948691	948692	rs2341365	G	A	0.9553	-0.909041	-1.02422	-1.93327
chr1	949122	949123	rs140198533	G	A	0.0109	-1.09737	-1.30923	-2.4066
chr1	954776	954777	rs61766299	C	A	0.5596	-1.31507	-0.428331	-1.7434
chr1	955015	955016	rs34927559	A	G	0.9195	0.919225	-0.834431	0.084794
chr1	956060	956061	rs199682825	A	AGGGGGGGG,AGGGGGGGGG	0.3459	0.889235	-1.66339	-0.774153
chr1	969772	969773	rs115170833	C	T	0.0239	1.20559	-1.54314	-0.337552
chr1	970214	970215	rs9442364	G	C	0.5736	0.941362	-2.42932	-1.48796
chr1	984146	984147	rs569475810	CAAAAAAAAAAA	C	0.9742	-1.00606	-1.03581	-2.04186
chr1	984493	984494	rs558237106	GC	G	0.7227	-0.96109	0.562554	-0.398536
chr1	990379	990380	rs3121561	C	T	0.3091	-1.01913	-0.900552	-1.91968
chr1	1003052	1003053	rs4074992	C	T	0.497	0.933837	-2.14198	-1.20814
chr1	1015550	1015551	rs9442370	C	T	0.5408	-0.944534	-0.899316	-1.84385
chr1	1026800	1026801	rs4562563	T	A	0.5944	-1.21837	-1.22695	-2.44531
chr1	1027069	1027070	rs11260590	G	A	0.1183	-0.989809	-0.345163	-1.33497
chr1	1027309	1027310	rs5772036	AAG	A	0.0358	0.956501	-2.10469	-1.14819
chr1	1045605	1045606	rs12080505	A	C	0.0109	1.46837	-3.17236	-1.70398
chr1	1050998	1050999	rs538430583	C	T	0.1004	-1.11291	-1.58444	-2.69735
chr1	1051868	1051869	rs6658634	G	C	0.0288	1.20048	-1.37914	-0.178653
chr1	1052107	1052108	rs6673257	A	G	0.0298	-0.919949	-1.18933	-2.10928
chr1	1057507	1057508	rs75135491	C	G	0.1034	1.02414	-1.78473	-0.760594
chr1	1058918	1058919	rs535350689	C	T	0.0189	-1.1812	-2.87137	-4.05257
chr1	1058948	1058949	rs534834785	C	T	0.0169	1.87817	-4.0514	-2.17323
chr1	1058951	1058952	rs557828959	C	A	0.0169	1.02696	-3.64136	-2.61441
chr1	1058977	1058978	rs72892239	T	C	0.0288	1.19283	-3.72833	-2.53549
chr1	1067864	1067865	rs9442358	A	C	0.9245	1.05569	-2.78902	-1.73333
chr1	1068882	1068883	rs61766346	G	A	0.1968	-0.863719	-1.24854	-2.11226
chr1	1071117	1071118	rs10907183	G	C	0.6113	1.61521	-2.24731	-0.632106
chr1	1092423	1092424	rs78975118	A	G	0.0288	1.01874	-1.01405	0.00468352
chr1	1092481	1092482	rs115785548	T	C	0.0249	1.51297	-2.26016	-0.747183
chr1	1092562	1092563	rs57527288	G	T	0.0378	-0.863882	-0.953184	-1.81707
chr1	1094062	1094063	rs7551688	T	C	0.2932	1.09249	-1.2226	-0.130112
chr1	1094184	1094185	rs79251457	C	T	0.0249	-0.851584	-1.01874	-1.87032
chr1	1109103	1109104	rs74045197	G	T	0.0557	1.78887	-1.8779	-0.0890344
chr1	1109652	1109653	rs11260538	G	A	0.0865	-1.09768	-0.714353	-1.81203
chr1	1118211	1118212	rs10907171	T	C	0.2555	1.02023	-1.04357	-0.0233382
chr1	1118727	1118728	rs12097131	C	G	0.0497	0.858483	-1.49211	-0.633631
chr1	1119857	1119858	rs1320565	C	T	0.0775	-1.28108	-1.74661	-3.02768
chr1	1120535	1120536	rs77950429	G	A	0.0179	-2.07207	-0.147093	-2.21916
chr1	1136273	1136274	rs112347635	GT	G	0.0417	-0.936024	-1.42057	-2.35659
chr1	1143450	1143451	rs3753347	A	G	0.0626	2.1162	-0.580327	1.53587
chr1	1144121	1144122	rs57356573	T	C	0.0278	2.15454	-1.71681	0.437731
chr1	1149315	1149316	rs35737009	C	G	0.0159	1.41074	-2.37527	-0.964528
chr1	1150763	1150764	rs3813202	G	A	0.0318	-0.882519	-1.05137	-1.93389
chr1	1160808	1160809	rs3753343	T	C	0.0885	1.2191	-2.46967	-1.25057
chr1	1161754	1161755	rs142693327	G	A	0.0875	1.85711	-1.83786	0.0192456
chr1	1172906	1172907	rs715643	C	T	0.0616	-1.80724	-0.611885	-2.41912
chr1	1182325	1182326	rs552383056	T	C	0.0119	1.62897	-1.02668	0.60229
chr1	1185557	1185558	rs142609243	T	C	0.0676	2.98403	-2.04666	0.937368
chr1	1216847	1216848	rs34385715	G	A	0.0149	-1.19903	-0.072188	-1.27122
chr1	1217010	1217011	rs1262894	A	C	0.0785	-1.08093	-0.422217	-1.50315
chr1	1225504	1225505	rs199510283	G	A	0.0179	-0.985578	-0.877848	-1.86343
chr1	1227193	1227194	rs151198245	G	A	0.0109	-1.39145	-0.669652	-2.0611
chr1	1227248	1227249	rs621668	T	C	0.0437	0.979533	-1.56323	-0.583699
chr1	1229372	1229373	rs544372915	C	T	0.0179	-0.909551	-0.850861	-1.76041
chr1	1234553	1234554	rs116119245	A	C	0.0249	-0.867726	-1.42973	-2.29746
chr1	1239934	1239935	rs12410087	A	C	0.0984	1.20789	-1.87404	-0.66615
chr1	1244161	1244162	rs182709601	C	G	0.0139	0.976709	-0.580679	0.39603
chr1	1259560	1259561	rs189752537	A	G	0.7982	-2.21881	-1.44611	-3.66492
chr1	1260167	1260168	rs61766199	C	A	0.9215	-1.37705	-0.0144562	-1.39151
chr1	1279427	1279428	rs3889966	G	A	0.1014	1.1057	-2.69318	-1.58747
chr1	1285357	1285358	rs11587525	A	G	0.9662	-0.914382	-0.61389	-1.52827
chr1	1291084	1291085	rs181929025	C	T	0.0229	-1.02478	-0.892804	-1.91759
chr1	1294137	1294138	esv3584993	ACCGCACCCTTGGAGGGACAAGAAGGTCCGAGGACATGGGCCCCTGATACCACGTGAT	A	0.0169	2.05978	-1.52277	0.53701
chr1	1294286	1294287	rs12731385	C	A	0.9215	-1.44049	-0.749086	-2.18958
chr1	1295881	1295882	rs564906656	G	GGGGGCGGGC	0.9185	1.10645	-1.52024	-0.413784
chr1	1295886	1295887	rs533071465	T	TGGGGGGC	0.9185	0.924424	-2.65992	-1.7355
chr1	1310646	1310647	rs139833628	C	T	0.0179	-1.51963	0.123918	-1.39571
chr1	1311021	1311022	rs2649593	C	T	0.0984	-1.00636	-0.89157	-1.89793
chr1	1334474	1334475	rs17851391	G	C	0.0308	0.856188	-1.55303	-0.696842
chr1	1335301	1335302	rs1240707	C	T	0.0845	-1.00037	-0.619852	-1.62022
chr1	1342268	1342269	rs536111712	T	G	0.1123	-1.63587	-0.657865	-2.29374
chr1	1342393	1342394	rs11548045	G	A	0.0417	-1.50224	0.480618	-1.02162
chr1	1356549	1356550	rs12089560	A	G	0.0845	-0.952724	-2.50045	-3.45317
chr1	1358722	1358723	rs1695854	G	T	0.0885	1.10513	-1.61627	-0.511135
chr1	1375206	1375207	rs140247431	T	C	0.0179	1.52407	-3.37003	-1.84596
chr1	1376566	1376567	rs1240697	A	G	0.1849	1.10793	-1.96783	-0.859907
chr1	1386015	1386016	rs34301361	A	G	0.1481	0.992564	-1.66854	-0.67598
chr1	1386088	1386089	rs149262155	C	T	0.0169	-0.978391	-1.10693	-2.08532
chr1	1397146	1397147	rs28413040	A	G	0.0229	-1.13794	-0.141707	-1.27965
chr1	1425699	1425700	rs819980	T	C	0.0994	-0.94479	-0.89979	-1.84458
chr1	1425815	1425816	rs149187984	G	A	0.0577	-1.6099	-1.07193	-2.68183
chr1	1429965	1429966	rs147532078	G	A	0.0169	0.897899	-2.06478	-1.16688
chr1	1429995	1429996	rs112806684	G	A	0.0577	-1.16343	-0.769948	-1.93338
chr1	1430515	1430516	rs113215852	G	A	0.0875	1.01856	-1.966	-0.947437
chr1	1430600	1430601	rs3851851	G	A	0.0268	-0.928902	-0.650772	-1.57967
chr1	1430689	1430690	rs376219560	C	T	0.0149	-1.84227	-0.365708	-2.20797
chr1	1431368	1431369	rs140821046	C	T	0.0129	-2.75456	-1.29245	-4.04701
chr1	1444148	1444149	rs190181683	G	C	0.0129	-1.33228	-1.52264	-2.85491
chr1	1446928	1446929	rs115247282	C	T	0.0129	1.08783	-2.19429	-1.10646
chr1	1469032	1469033	rs2889625	C	T	0.0358	-1.51443	-0.773691	-2.28812
chr1	1469198	1469199	rs569841595	C	T	0.0159	0.888352	-2.36048	-1.47213
chr1	1469199	1469200	rs535958228	A	G	0.0159	1.14198	-2.39484	-1.25286
chr1	1469262	1469263	rs6681228	G	T	0.0577	2.07186	-2.47629	-0.404434
chr1	1475800	1475801	rs190482382	C	T	0.0378	1.35157	-2.23821	-0.886637
chr1	1490558	1490559	rs3820075	A	G	0.2863	1.46283	-2.74875	-1.28592
chr1	1498257	1498258	rs114305501	G	A	0.0149	1.12043	-2.74727	-1.62684
chr1	1535758	1535759	rs72897847	C	T	0.3439	1.60791	-2.55307	-0.945162
chr1	1555365	1555366	rs9329576	T	C	0.7594	-1.33248	-0.452945	-1.78542
chr1	1564703	1564704	rs546281820	A	ACGG	0.0199	0.914406	-1.52577	-0.611368
chr1	1580523	1580524	rs201539299	C	T	0.1083	-0.920714	-0.182693	-1.10341
chr1	1590574	1590575	rs9661285	G	A	0.7068	-1.33061	0.127947	-1.20266
chr1	1609706	1609707	rs114806341	C	T	0.0517	-0.946521	-0.986905	-1.93343
chr1	1610446	1610447	rs61776791	C	T	0.0149	-1.91617	-1.28086	-3.19703
chr1	1615347	1615348	rs7520934	A	C	0.4503	1.10489	-2.27795	-1.17306
chr1	1643739	1643740	rs572556304	C	T	0.0258	-0.920714	-0.182693	-1.10341
chr1	1669963	1669964	rs369037660	G	A	0.4175	1.1828	-1.69886	-0.516061
chr1	1670044	1670045	rs200217868	C	T	0.4553	-1.32518	-0.93144	-2.25662
chr1	1690129	1690130	rs529792614	G	C	0.0149	-0.979609	0.169477	-0.810133
chr1	1695573	1695574	rs876029	G	T	0.9314	1.35701	-1.61263	-0.255622
chr1	1710034	1710035	rs12058658	C	T	0.7376	-1.53103	0.0671208	-1.46391
chr1	1712229	1712230	rs10907194	C	T	0.2306	-1.05015	0.739457	-0.31069
chr1	1714344	1714345	rs56693667	T	G	0.1948	1.09904	-2.4562	-1.35716
chr1	1738370	1738371	rs11585349	C	T	0.1203	0.922657	-1.81108	-0.888427
chr1	1821910	1821911	rs184495980	C	G	0.0954	0.943773	-1.83789	-0.894113
chr1	1832700	1832701	rs4648730	C	T	0.505	-0.879646	-1.58912	-2.46877
chr1	1851211	1851212	rs28706999	C	T	0.0437	0.930923	-1.26321	-0.332289
chr1	1860140	1860141	rs28531873	C	T	0.0437	1.97159	-3.74806	-1.77647
chr1	1875857	1875858	rs2803336	C	G	0.495	1.10937	-2.17724	-1.06787
chr1	1909317	1909318	rs61776976	G	A	0.3091	1.30865	-2.02954	-0.720882
chr1	1920994	1920995	rs116692827	G	A	0.0408	1.16048	-2.53711	-1.37662
chr1	1950550	1950551	rs72911372	G	A	0.1779	1.62036	-2.74037	-1.12001
chr1	1964074	1964075	rs16824630	T	C	0.1362	-0.94368	-0.912762	-1.85644
chr1	1981835	1981836	rs56380654	C	T	0.7922	-1.07634	0.134105	-0.94223
chr1	1981885	1981886	rs192386882	C	G	0.0865	-1.53973	0.963827	-0.575901
chr1	1986097	1986098	rs28377232	A	G	0.0109	1.01395	-1.8854	-0.871453
chr1	1991172	1991173	rs2247923	A	G	0.3429	1.39253	-2.05006	-0.65753
chr1	1991301	1991302	rs1105099	G	A	0.1928	-1.26704	-0.77003	-2.03707
chr1	1993721	1993722	rs13303346	C	T	0.1262	-1.10194	-0.630571	-1.73251
chr1	2020003	2020004	rs79953122	C	T	0.0378	-1.56162	-0.283063	-1.84468
chr1	2026360	2026361	rs12755035	G	A	0.1153	1.0312	-2.01879	-0.987584
chr1	2030006	2030007	rs58602729	CCT	C	0.3708	-3.2059	1.96541	-1.24049
chr1	2040387	2040388	rs6683011	G	A	0.8917	-1.10266	-0.600441	-1.7031
chr1	2056490	2056491	rs139032107	G	A	0.0268	1.0019	-1.23756	-0.235663
chr1	2057749	2057750	rs3107154	A	C	0.8926	1.0288	-1.81464	-0.785836
chr1	2064428	2064429	rs34415348	A	C	0.0964	1.27873	-1.1343	0.144427
chr1	2092282	2092283	rs12094159	C	T	0.0954	-1.30051	-0.168734	-1.46924
chr1	2136325	2136326	rs201685233	GCCCTCAAGCCCCGC	G	0.1024	-0.873872	1.87671	1.00284
chr1	2136549	2136550	rs557820126	GC	G	0.2714	1.21174	1.42671	2.63846
chr1	2139016	2139017	rs138676014	C	T	0.0239	-0.967655	-0.979945	-1.9476
chr1	2144981	2144982	rs2480714	G	T	0.6829	-1.34521	-0.0736192	-1.41883
chr1	2145280	2145281	rs3795276	A	G	0.1978	1.51617	-1.31434	0.201829
chr1	2161964	2161965	rs148644634	C	T	0.0209	1.03379	-1.05871	-0.0249242
chr1	2166409	2166410	rs263530	T	C	0.5915	1.53759	-1.71504	-0.177442
chr1	2189195	2189196	rs12136830	A	T	0.3817	0.900356	-2.44786	-1.54751
chr1	2200831	2200832	rs12043185	G	A	0.0338	0.918047	-2.35502	-1.43697
chr1	2204754	2204755	rs7553178	G	A	0.663	-1.12386	-0.782237	-1.9061
chr1	2210767	2210768	rs79942186	G	A	0.0278	0.993802	-2.13644	-1.14264
chr1	2215908	2215909	rs2643913	A	C	0.3569	1.23989	-1.83597	-0.596084
chr1	2215977	2215978	rs72927851	G	C	0.0278	1.24787	-2.66151	-1.41364
chr1	2236358	2236359	rs60363208	G	A	0.165	-0.994778	0.843662	-0.151116
chr1	2246286	2246287	rs959528	G	C	0.7664	-0.868266	-0.857486	-1.72575
chr1	2263426	2263427	rs34058136	G	A	0.1849	-1.0931	-1.11978	-2.21288
chr1	2299911	2299912	rs7546224	T	C	0.3529	1.489	-1.28105	0.207955
chr1	2314318	2314319	rs2643901	T	C	0.8887	-1.23933	-1.92528	-3.16461
chr1	2319529	2319530	rs2645061	G	T	0.0239	0.999349	-1.3254	-0.326049
chr1	2323040	2323041	rs77804600	T	C	0.2525	0.884067	0.498083	1.38215
chr1	2346062	2346063	rs115010992	C	T	0.0159	-1.04772	-0.228188	-1.2759
chr1	2362980	2362981	rs144264349	A	G	0.0179	0.860088	-0.53305	0.327038
chr1	2372075	2372076	rs3001354	A	C,G,T	0.7495	0.886501	-0.880025	0.0064762
chr1	2373587	2373588	rs191055918	G	A	0.0159	0.920094	-1.22774	-0.30765
chr1	2387133	2387134	rs76122157	G	C	0.0497	1.80701	-2.04722	-0.240211
chr1	2387714	2387715	rs12037821	C	T	0.1431	1.34962	-2.46678	-1.11716
chr1	2391251	2391252	rs16824398	A	C	0.492	1.89832	-0.9013	0.997017
chr1	2398863	2398864	rs34349643	C	G	0.1103	0.911252	-0.86537	0.0458818
chr1	2398880	2398881	rs111524361	GCCTTCCTCA	G	0.3618	1.12159	-2.11272	-0.991124
chr1	2399603	2399604	rs2494630	G	C	0.3608	-0.88628	-1.47602	-2.3623
chr1	2399920	2399921	rs3118347	A	C	0.506	-1.00087	-2.24545	-3.24632
chr1	2399961	2399962	rs561547583	A	G	0.0258	3.38805	-3.58682	-0.198768
chr1	2400534	2400535	rs114908466	G	A	0.0139	-1.12872	-1.4765	-2.60522
chr1	2400742	2400743	rs74049271	G	A	0.0388	1.00065	-1.35947	-0.358825
chr1	2469206	2469207	rs2495377	C	G	0.0119	1.83393	-3.44413	-1.6102
chr1	2469242	2469243	rs2495376	C	T	0.0119	-1.16467	-0.825513	-1.99018
chr1	2477357	2477358	rs12097268	T	A	0.4761	-1.02966	-0.78626	-1.81592
chr1	2478510	2478511	rs2477678	T	A	0.493	-0.897538	-0.580612	-1.47815
chr1	2480245	2480246	rs568710798	C	A	0.171	1.20624	-1.91472	-0.708478
chr1	2501337	2501338	rs10797432	C	T	0.4682	-3.1322	1.92847	-1.20373
chr1	2507937	2507938	rs10752745	A	G	0.4662	-1.45037	-0.825694	-2.27606
chr1	2509867	2509868	rs140567883	C	G	0.0209	-1.08496	0.228711	-0.85625
chr1	2509874	2509875	rs71630981	C	G	0.0179	-1.90163	-0.115704	-2.01733
chr1	2513104	2513105	rs735000	C	T	0.1511	-0.855594	-1.20202	-2.05761
chr1	2518213	2518214	rs371199788	G	A	0.0169	-2.21207	1.29875	-0.913318
chr1	2518409	2518410	rs143250534	C	T	0.0209	-0.85463	-1.80562	-2.66025
chr1	2539228	2539229	rs140020211	C	T	0.0199	-1.39916	-0.0570148	-1.45617
chr1	2539399	2539400	rs4445406	T	C	0.329	-1.94195	0.383614	-1.55833
chr1	2539589	2539590	rs4422947	C	T	0.329	-0.913639	-1.16693	-2.08057
chr1	2539602	2539603	rs60687045	G	A	0.3091	1.54144	-3.15637	-1.61492
chr1	2539673	2539674	rs148683401	C	A	0.0199	1.22296	-3.79165	-2.56868
chr1	2561258	2561259	rs70956313	GCCC	G	0.6909	-1.6856	-0.820196	-2.5058
chr1	2565229	2565230	rs12741533	G	C	0.0875	0.91114	-2.41254	-1.5014
chr1	2565326	2565327	rs55649610	G	T	0.0258	-1.43519	-0.896676	-2.33187
chr1	2584786	2584787	rs56375117	G	A	0.1262	-1.62746	0.185119	-1.44234
chr1	2585689	2585690	rs61765823	A	C	0.0825	-1.00725	-0.720639	-1.72789
chr1	2585800	2585801	rs28498367	G	C	0.1153	1.34155	-2.0439	-0.702348
chr1	2585964	2585965	rs6689281	T	C	0.7624	0.933801	-1.49857	-0.564768
chr1	2614952	2614953	rs6687492	A	C	0.7505	-1.00725	-0.720639	-1.72789
chr1	2615056	2615057	rs6604994	C	G	0.7376	-0.916019	-1.18017	-2.09619
chr1	2615534	2615535	rs548963268	G	A	0.0139	-1.52609	-0.479996	-2.00609
chr1	2616130	2616131	rs538996413	T	C	0.1123	-1.4789	0.073085	-1.40582
chr1	2616131	2616132	rs559036277	G	A	0.1123	-1.33959	0.206298	-1.13329
chr1	2618174	2618175	rs149212243	T	C	0.2197	-1.55955	0.0402547	-1.5193
chr1	2618180	2618181	rs565396242	A	G	0.1252	-0.897388	0.198068	-0.69932
chr1	2618521	2618522	rs4648679	C	G	0.1561	-1.15951	-1.61607	-2.77558
chr1	2618556	2618557	rs199938865	C	T	0.0885	1.52044	-2.06526	-0.544818
chr1	2620834	2620835	rs368868269	G	A	0.0308	-1.54391	-0.797714	-2.34162
chr1	2621267	2621268	rs571639229	T	C	0.0199	-1.42058	-1.57219	-2.99277
chr1	2621351	2621352	rs28774982	C	G	0.6899	1.79862	-1.74125	0.0573692
chr1	2626769	2626770	rs537906427	C	T	0.0189	0.944717	-1.28068	-0.335958
chr1	2626894	2626895	rs376952153	G	A	0.0199	-1.19622	-1.0096	-2.20582
chr1	2627093	2627094	rs28486014	C	A	0.6909	0.969905	-0.690431	0.279474
chr1	2628325	2628326	rs28655771	A	G	0.8509	-0.928908	-1.98288	-2.91179
chr1	2629001	2629002	rs4648685	C	A	0.0765	-0.948693	-0.982429	-1.93112
chr1	2630263	2630264	rs200184868	C	G	0.0209	1.76412	-1.49541	0.268716
chr1	2631229	2631230	rs151028714	C	A	0.0199	1.22093	-1.66086	-0.43993
chr1	2631362	2631363	rs12746501	C	T	0.1014	1.11376	-1.26248	-0.148719
chr1	2631469	2631470	rs28521907	T	C	0.0219	1.04712	-0.816737	0.23038
chr1	2631625	2631626	rs150868602	C	T	0.0229	1.4789	-1.40582	0.073085
chr1	2631798	2631799	rs545482129	G	A	0.0189	1.07209	-0.211786	0.860301
chr1	2631803	2631804	rs12743419	G	A	0.4543	-0.93716	-0.610594	-1.54775
chr1	2632288	2632289	rs188342188	G	T	0.0189	-1.22175	-0.192344	-1.41409
chr1	2632297	2632298	rs369461341	A	C	0.0189	1.15159	-1.58014	-0.428545
chr1	2632356	2632357	rs112030561	C	G	0.0338	-1.24537	-0.433824	-1.67919
chr1	2632379	2632380	rs377756586	G	A	0.0577	-1.70075	0.843801	-0.856953
chr1	2684574	2684575	rs146341614	A	G	0.0239	0.881703	-1.30301	-0.421308
chr1	2686182	2686183	rs199671872	G	T	0.3082	1.3455	-2.86657	-1.52107
chr1	2688674	2688675	rs559480543	C	G	0.0447	1.13526	-3.46955	-2.33429
chr1	2692055	2692056	rs570967513	C	T	0.0129	1.14483	-1.02679	0.118046
chr1	2692109	2692110	rs538168015	G	T	0.0268	1.16111	-4.24041	-3.0793
chr1	2694495	2694496	rs6424062	G	A	0.4404	-1.39115	0.0887744	-1.30237
chr1	2738665	2738666	rs148827013	AGTGTGCACTGGGGCGGGGCGG	A	0.0169	-1.1194	-0.404222	-1.52362
chr1	2766227	2766228	rs6676347	G	A	0.7575	-1.31638	-0.451851	-1.76823
chr1	2771503	2771504	rs12743952	G	A	0.4125	0.95184	-2.09528	-1.14344
chr1	2771622	2771623	rs34161193	G	A	0.4125	2.12318	-3.20509	-1.08191
chr1	2771655	2771656	rs35134901	G	C	0.4125	-1.49689	-0.296854	-1.79374
chr1	2791142	2791143	rs10910023	C	T	0.5527	1.82978	-3.62122	-1.79145
chr1	2792636	2792637	rs115323566	C	T	0.0258	-1.00635	-0.623763	-1.63012
chr1	2820860	2820861	rs17384388	G	A	0.0676	-1.10034	-1.68622	-2.78656
chr1	2844066	2844067	rs4648437	A	G	0.2584	1.55015	-1.33436	0.215784
chr1	2866931	2866932	rs2606413	C	T	0.2833	-1.15662	-1.91841	-3.07503
chr1	2880383	2880384	rs3001799	A	G	0.16	-1.72563	0.185409	-1.54022
chr1	2899602	2899603	rs11586705	G	T	0.0348	-1.24531	0.61488	-0.630431
chr1	2899961	2899962	rs111828763	G	C	0.0119	1.41056	-2.35267	-0.942111
chr1	2904987	2904988	rs148454990	T	C	0.0209	-0.885075	-0.936585	-1.82166
chr1	2971451	2971452	rs56069604	T	C	0.1501	-1.42946	-0.911555	-2.34102
chr1	2995632	2995633	rs2788093	C	T	0.1769	-0.949356	-0.348042	-1.2974
chr1	2999517	2999518	rs11581212	A	G	0.1958	-1.69635	-1.25051	-2.94686
chr1	3003315	3003316	rs2742676	G	A	0.2406	1.08566	-1.0449	0.0407605
chr1	3010702	3010703	rs734373	G	T	0.2992	-0.876001	0.079877	-0.796124
chr1	3010852	3010853	rs734372	G	A	0.3002	1.08874	-1.77424	-0.685502
chr1	3010968	3010969	rs734374	A	C	0.2992	0.943279	-1.03882	-0.095542
chr1	3010981	3010982	rs78021538	G	A	0.0109	-1.06238	-1.20682	-2.2692
chr1	3014409	3014410	rs548149441	C	G	0.0119	2.80956	-3.72401	-0.91445
chr1	3018225	3018226	rs2993492	G	A	0.1521	-0.932633	0.0686379	-0.863995
chr1	3021062	3021063	rs2993494	G	A	0.1481	-1.31292	-0.174264	-1.48718
chr1	3021107	3021108	rs34368404	G	A	0.1054	-2.19063	-1.13833	-3.32896
chr1	3021295	3021296	rs55898371	A	C	0.1759	1.12865	-2.75623	-1.62758
chr1	3029656	3029657	rs12136745	G	A	0.0765	1.63658	-2.19758	-0.561
chr1	3036601	3036602	rs143702617	T	A	0.0209	-1.58082	-1.4442	-3.02502
chr1	3041650	3041651	rs2817173	C	T	0.1551	-1.1421	-0.253524	-1.39562
chr1	3045231	3045232	rs147796784	CTCCCACCATGCTACTGGAGACCA	C	0.2763	0.922239	-2.27263	-1.35039
chr1	3050220	3050221	rs12022170	G	A	0.0636	-1.16443	-1.51096	-2.6754
chr1	3053730	3053731	rs76880169	C	T	0.0249	1.12706	-0.764014	0.363042
chr1	3086933	3086934	rs71503051	C	A	0.0457	0.997912	-2.31177	-1.31386
chr1	3088053	3088054	rs34456377	C	A	0.0457	-0.949105	-0.865953	-1.81506
chr1	3091438	3091439	rs72846839	C	T	0.0437	-1.24818	-0.853688	-2.10186
chr1	3091586	3091587	rs61759167	C	T	0.2545	-1.40483	-0.426355	-1.83118
chr1	3103311	3103312	rs12135062	G	T	0.2306	-0.854155	-0.723723	-1.57788
chr1	3105275	3105276	rs2817138	T	G	0.8688	0.88738	-2.96396	-2.07658
chr1	3111668	3111669	rs12094678	G	A	0.1839	-1.23756	-0.73415	-1.97171
chr1	3113147	3113148	rs7520732	A	G	0.1928	1.77214	-2.77513	-1.00299
chr1	3138984	3138985	rs2651893	C	T	0.0199	-1.28955	-0.461595	-1.75114
chr1	3144473	3144474	rs114820997	A	C	0.0775	-0.864377	-1.17956	-2.04394
chr1	3157841	3157842	rs2500254	A	G	0.1571	-1.09237	-1.21398	-2.30635
chr1	3164343	3164344	rs4648375	G	A	0.0179	-1.36332	-0.0518014	-1.41512
chr1	3178486	3178487	rs76544063	G	C	0.0905	1.94276	-0.462545	1.48022
chr1	3208554	3208555	rs12405692	A	G	0.1352	1.60894	-2.03104	-0.422101
chr1	3212590	3212591	rs2500290	G	C	0.5577	-1.59346	-0.427911	-2.02138
chr1	3212930	3212931	rs60005551	G	A	0.2078	-0.918593	-1.08794	-2.00653
chr1	3218328	3218329	rs2455136	A	T	0.7555	1.43693	-1.58774	-0.150806
chr1	3224802	3224803	rs2483258	A	G	0.7624	1.40563	-2.81198	-1.40635
chr1	3229735	3229736	rs145986026	C	T	0.0736	-1.35543	0.144841	-1.21059
chr1	3229989	3229990	rs2282193	T	C	0.173	1.72484	-1.60601	0.118833
chr1	3239991	3239992	rs12047667	C	T	0.0139	-1.12043	-0.822429	-1.94286
chr1	3262366	3262367	rs377373723	TGGTTCCTCCTGTGCTGCCCTCTC	T	0.3042	-1.44507	-0.137189	-1.58226
chr1	3267280	3267281	rs2500256	C	A	0.0477	-0.952956	-0.287942	-1.2409
chr1	3267825	3267826	rs77270279	G	A	0.2376	1.71773	-2.18784	-0.470107
chr1	3303730	3303731	rs2065524	G	A	0.0755	-0.964103	-0.964105	-1.92821
chr1	3318831	3318832	rs145611121	G	GC	0.659	1.03359	-2.80435	-1.77076
chr1	3318841	3318842	rs56148282	G	A	0.3449	-1.08952	-1.25666	-2.34618
chr1	3319060	3319061	rs1889124	A	G	0.7555	-0.870802	-0.932126	-1.80293
chr1	3319680	3319681	rs12562399	C	G	0.6511	1.05473	-2.53279	-1.47806
chr1	3319776	3319777	rs4471209	G	A	0.3042	-0.943465	-0.497821	-1.44129
chr1	3326639	3326640	rs4648494	A	G	0.4901	0.868416	-2.22748	-1.35907
chr1	3332211	3332212	rs111652194	C	T	0.0298	-0.936456	0.0667474	-0.869708
chr1	3369819	3369820	rs56164540	C	T	0.0388	1.60331	-0.278092	1.32522
chr1	3371408	3371409	rs142378881	G	A	0.0537	1.81896	-3.24965	-1.43069
chr1	3376737	3376738	rs12145462	C	T	0.0338	1.04492	-0.977657	0.0672666
chr1	3385014	3385015	rs7554513	G	A	0.0736	-1.19453	-0.149567	-1.3441
chr1	3385128	3385129	rs2493250	G	A	0.9573	-0.87684	0.098587	-0.778253
chr1	3385226	3385227	rs1417898	G	A	0.0408	1.38158	-1.08918	0.292399
chr1	3388182	3388183	rs61759241	G	A	0.0249	0.859486	-1.37786	-0.518378
chr1	3388555	3388556	rs11580089	A	G	0.0606	-0.943394	0.176656	-0.766739
chr1	3398983	3398984	rs11579276	C	T	0.3827	-2.03265	-0.753655	-2.78631
chr1	3407718	3407719	rs7549092	T	A	0.0318	0.855977	-1.70665	-0.850673
chr1	3411562	3411563	rs2821036	G	A	0.0596	-2.39949	-0.638837	-3.03833
chr1	3411651	3411652	rs1935128	G	A	0.0586	1.57037	-1.9582	-0.387835
chr1	3412643	3412644	rs41315292	G	A	0.0328	-1.15835	-0.665498	-1.82385
chr1	3412992	3412993	rs74050557	G	A	0.0298	0.994658	-2.827	-1.83234
chr1	3418390	3418391	rs4648508	C	T	0.336	-0.908521	-0.616223	-1.52474
chr1	3418793	3418794	rs2821026	G	C	0.0875	-1.4643	-0.123985	-1.58829
chr1	3446310	3446311	rs11589175	G	A	0.1193	-0.919116	-0.216085	-1.1352
chr1	3447277	3447278	rs75413213	G	A	0.0875	2.38416	-3.16152	-0.777364
chr1	3447796	3447797	rs4648521	G	A	0.0308	-0.851184	-0.560106	-1.41129
chr1	3468149	3468150	rs7533321	G	A	0.0527	0.917126	-1.29513	-0.378001
chr1	3475082	3475083	rs2821062	C	T	0.3032	-1.35795	-0.699188	-2.05713
chr1	3481968	3481969	rs2794352	G	C	0.2724	-2.99191	0.64685	-2.34506
chr1	3490291	3490292	rs184603965	T	G	0.0109	-1.09439	-0.28703	-1.38142
chr1	3504486	3504487	rs530762981	A	C	0.827	0.990238	-1.51933	-0.529092
chr1	3504506	3504507	rs575038871	G	T	0.7266	-1.46127	-0.176549	-1.63781
chr1	3504509	3504510	rs567422217	G	A	0.7266	-1.15611	-0.171333	-1.32745
chr1	3504517	3504518	rs536161824	G	A	0.838	-1.52515	-0.033519	-1.55867
chr1	3504519	3504520	rs147481572	G	A	0.838	-1.15611	-0.171333	-1.32745
chr1	3504539	3504540	rs572193701	C	A	0.8479	-1.94584	0.770276	-1.17557
chr1	3504540	3504541	rs535004313	C	T	0.8479	-2.2171	1.54044	-0.676652
chr1	3504757	3504758	rs562768712	G	A	0.9066	-2.62652	1.97081	-0.655716
chr1	3504759	3504760	rs537524743	G	A	0.9066	-2.92591	1.37696	-1.54895
chr1	3504822	3504823	rs574131018	G	A	0.9632	-1.79391	1.93815	0.144243
chr1	3504829	3504830	rs542962528	G	A	0.9632	-2.92591	1.37696	-1.54895
chr1	3513982	3513983	rs36017484	T	G	0.0845	0.948318	-3.42104	-2.47272
chr1	3528291	3528292	rs60020855	GC	G	0.8748	2.01148	-2.72066	-0.709178
chr1	3531835	3531836	rs188448307	C	G,T	0.0189	2.04608	-2.98444	-0.938365
chr1	3535463	3535464	rs7538707	A	G	0.7913	1.37413	-3.01822	-1.64408
chr1	3535679	3535680	rs10797406	G	C	0.2992	1.02768	-1.94695	-0.919269
chr1	3537361	3537362	rs4648400	A	G	0.7913	1.20981	-1.87698	-0.667161
chr1	3537508	3537509	rs113346860	C	T	0.0417	-1.09221	-0.432975	-1.52518
chr1	3542185	3542186	rs139992228	G	A	0.0328	0.934209	-1.41229	-0.478085
chr1	3547028	3547029	rs71634350	A	G	0.2535	-1.65288	0.974215	-0.67867
chr1	3548831	3548832	rs2760320	G	C	0.0547	-0.985546	-1.37166	-2.3572
chr1	3566432	3566433	rs1004649	T	G	0.0398	1.79818	-1.78541	0.0127684
chr1	3585581	3585582	rs3765694	G	A	0.4513	1.29597	-1.42074	-0.124774
chr1	3585863	3585864	rs11801431	T	G	0.0984	0.960384	-0.942702	0.0176822
chr1	3600798	3600799	rs3765712	G	A	0.0984	-0.93356	0.13562	-0.797939
chr1	3605507	3605508	rs78353993	G	A	0.0189	-2.57866	-1.25605	-3.83471
chr1	3605586	3605587	rs1885870	G	C	0.4036	1.22108	-2.96942	-1.74835
chr1	3609396	3609397	rs879621	C	A	0.3797	-1.00013	-0.148361	-1.14849
chr1	3620434	3620435	rs12742969	A	G	0.4006	-1.13128	-0.468457	-1.59974
chr1	3629848	3629849	rs3765759	T	A	0.0139	-1.04121	-0.229153	-1.27036
chr1	3636225	3636226	rs747828	T	C	0.0169	1.03822	-2.61876	-1.58053
chr1	3643926	3643927	rs2296031	A	G	0.0696	-1.51338	0.956353	-0.557031
chr1	3658769	3658770	rs12068191	T	C	0.0785	-1.22579	0.57418	-0.651611
chr1	3663056	3663057	rs3737590	A	T	0.3171	-0.9699	-0.712058	-1.68196
chr1	3663640	3663641	rs75438821	C	T	0.3171	1.91428	-2.46616	-0.551885
chr1	3676597	3676598	rs1181884	T	C	0.1312	1.62202	-1.6478	-0.0257758
chr1	3689108	3689109	rs367810010	GGCCCCGCCCCCCTCTC	G	0.2336	-1.89997	1.97012	0.0701473
chr1	3701662	3701663	rs2298227	T	C	0.1213	0.888619	-2.1338	-1.24518
chr1	3713745	3713746	rs6424052	A	G	0.2137	0.926868	-1.87137	-0.944504
chr1	3718489	3718490	rs6670245	A	G	0.1133	1.62692	-2.64457	-1.01765
chr1	3721858	3721859	rs6691991	G	C	0.2555	1.18804	-2.61144	-1.4234
chr1	3726356	3726357	rs138006781	G	A	0.0139	1.09617	-2.9158	-1.81963
chr1	3726721	3726722	rs78952658	C	T	0.0249	-1.10165	-0.17086	-1.27251
chr1	3731616	3731617	rs3795255	G	C	0.0288	-1.16159	-0.939552	-2.10115
chr1	3731653	3731654	rs113041467	C	T	0.0507	1.62639	-0.0741498	1.55224
chr1	3756461	3756462	rs143529319	C	T	0.0179	-1.90195	0.4528	-1.44915
chr1	3772938	3772939	rs4648349	G	C	0.3022	-1.78248	-1.22991	-3.01239
chr1	3773374	3773375	rs529748592	G	A	0.0109	-0.931691	-0.175259	-1.10695
chr1	3773545	3773546	rs12145238	A	C	0.3002	-1.30565	0.244494	-1.06116
chr1	3773717	3773718	rs4648428	A	G	0.9423	1.26434	-2.14943	-0.885086
chr1	3774129	3774130	rs34891610	A	G	0.3032	1.32274	-2.1166	-0.793866
chr1	3774311	3774312	rs12726906	T	C	0.3032	0.880268	-1.58363	-0.703362
chr1	3786409	3786410	rs10909811	G	A	0.1163	-2.15339	-0.558176	-2.71157
chr1	3786575	3786576	rs12739949	C	G	0.0865	-0.901461	-0.793797	-1.69526
chr1	3786744	3786745	rs12740232	C	T	0.0865	0.920778	-2.24398	-1.32321
chr1	3809188	3809189	rs186667865	C	A	0.0149	-0.853996	-0.437049	-1.29104
chr1	3816682	3816683	rs113529609	A	G	0.1958	1.70477	-1.64943	0.0553424
chr1	3816949	3816950	rs75689004	C	T	0.161	-1.42007	-0.146021	-1.56609
chr1	3817537	3817538	rs35759189	AG	A	0.2972	1.08831	-0.791096	0.297214
chr1	3817970	3817971	rs11811801	C	T	0.2972	-1.03923	-0.0186715	-1.0579
chr1	3823803	3823804	rs76419011	C	T	0.169	-2.062	-1.05266	-3.11466
chr1	3827580	3827581	rs75186451	C	T	0.0755	-1.07838	-0.388164	-1.46654
chr1	3838399	3838400	rs36109325	C	T	0.162	0.86824	-1.42256	-0.554323
chr1	4008568	4008569	rs79279812	C	T	0.1362	-1.30226	-0.924446	-2.22671
chr1	4013996	4013997	rs10915431	C	T	0.0646	-1.56857	-0.86162	-2.43019
chr1	4038358	4038359	rs72644269	C	T	0.0537	-1.5465	-0.66812	-2.21462
chr1	4068051	4068052	rs6675979	G	A	0.4891	-1.61676	1.75676	0.139996
chr1	4068244	4068245	rs12744667	G	A	0.3221	-1.36936	0.310411	-1.05895
chr1	4092903	4092904	rs10915657	T	C	0.1779	1.66059	-0.490374	1.17022
chr1	4092925	4092926	rs12128330	G	A	0.164	-0.896045	-1.10482	-2.00086
chr1	4092941	4092942	rs78561413	G	A	0.0139	-2.05476	0.353317	-1.70145
chr1	4092986	4092987	rs78036575	G	T	0.0129	-1.43972	-0.104344	-1.54407
chr1	4093502	4093503	rs12041382	C	T	0.0139	-1.16499	1.21129	0.0462938
chr1	4093554	4093555	rs55877711	T	C	0.1799	-1.24764	0.0877492	-1.15989
chr1	4093628	4093629	rs12041420	C	T	0.0139	-0.890602	-1.18147	-2.07207
chr1	4094429	4094430	rs78425991	T	C	0.0139	1.6658	-2.15672	-0.490915
chr1	4095607	4095608	rs4361965	G	A	0.1769	1.12485	-1.94494	-0.820095
chr1	4121383	4121384	rs7524590	A	G	0.8479	1.17692	-1.51414	-0.337222
chr1	4168826	4168827	rs9887911	G	C	0.1909	0.941338	-1.25157	-0.31023
chr1	4187641	4187642	rs12087859	C	T	0.1014	-1.92548	-0.608161	-2.53364
chr1	4232516	4232517	rs12405392	C	T	0.339	1.03499	-2.48922	-1.45423
chr1	4232614	4232615	rs117267790	T	C	0.0139	0.895901	-0.805728	0.0901736
chr1	4232720	4232721	rs74808532	G	A	0.0616	-1.41899	-0.665187	-2.08417
chr1	4232797	4232798	rs12125840	G	C	0.0805	-0.863924	-1.67902	-2.54295
chr1	4232980	4232981	rs12130304	A	T	0.0795	-0.882025	0.39984	-0.482185
chr1	4275219	4275220	rs148983073	C	T	0.0189	-0.852482	-0.719334	-1.57182
chr1	4283724	4283725	rs71640914	G	A	0.0676	-1.29734	-0.850462	-2.1478
chr1	4283857	4283858	rs870143	C	A	0.2545	-1.17893	-1.67975	-2.85869
chr1	4288551	4288552	rs1874266	A	G	0.7127	1.39881	-0.533494	0.865314
chr1	4357459	4357460	rs75163403	G	A	0.0169	-3.11716	-1.16349	-4.28066
chr1	4363186	4363187	rs200400406	GCATTCCATTC	G	0.2813	-1.07063	0.799042	-0.271591
chr1	4367172	4367173	rs116019360	A	G	0.0557	1.2091	-1.10081	0.108288
chr1	4368270	4368271	rs10915508	G	A	0.2495	-1.2839	-1.48117	-2.76507
chr1	4411305	4411306	rs629569	G	A	0.2276	-0.981749	-0.26654	-1.24829
chr1	4440512	4440513	rs590798	A	C	0.9076	1.00174	-1.59444	-0.592698
chr1	4471942	4471943	rs144347020	G	A	0.0209	-1.63022	-0.948361	-2.57858
chr1	4472375	4472376	rs114060995	T	A	0.0199	1.19948	-3.04046	-1.84098
chr1	4476280	4476281	rs72632764	C	T	0.0875	2.90769	-0.721199	2.18649
chr1	4476304	4476305	rs561703909	G	A	0.0119	-0.976932	-1.01367	-1.9906
chr1	4486094	4486095	rs4654537	A	G	0.7227	1.02194	1.11975	2.14169
chr1	4491444	4491445	rs10915534	C	T	0.1531	-0.951584	-1.59187	-2.54345
chr1	4523231	4523232	rs687103	T	C	0.3469	0.861681	-1.10949	-0.247806
chr1	4523441	4523442	rs688029	T	C	0.3469	-1.08929	-1.82656	-2.91585
chr1	4548087	4548088	rs350181	G	A	0.1014	1.90393	-1.57359	0.330344
chr1	4548520	4548521	rs545749419	A	G	0.1262	-0.897485	-1.30211	-2.19959
chr1	4575666	4575667	rs1399848	T	C	0.2903	-0.900393	-0.575223	-1.47562
chr1	4575671	4575672	rs1399849	G	C	0.2903	0.994733	-2.08903	-1.0943
chr1	4604656	4604657	rs114626239	G	C	0.0318	1.50985	-1.95913	-0.449282
chr1	4605187	4605188	rs72852759	A	T	0.1531	0.91308	-1.4417	-0.528616
chr1	4621462	4621463	rs241267	C	T	0.4871	-1.25156	-0.714333	-1.96589
chr1	4645724	4645725	rs7517269	A	G	0.1859	1.37923	-2.10415	-0.724918
chr1	4646072	4646073	rs561468	C	A	0.9423	-1.14263	-1.47717	-2.61979
chr1	4651229	4651230	rs164774	A	C,T	0.9423	-1.09732	-1.65216	-2.74949
chr1	4663706	4663707	rs77923597	T	G	0.0119	-2.24174	1.29583	-0.945919
chr1	4676540	4676541	rs12401608	A	C	0.1093	-1.1027	-1.48912	-2.59181
chr1	4687258	4687259	rs149287860	C	T	0.0139	-1.48829	0.228622	-1.25966
chr1	4712987	4712988	rs55778567	C	T	0.167	-0.956485	-0.18896	-1.14544
chr1	4735260	4735261	rs13376666	A	G	0.2873	-1.04013	-2.35721	-3.39734
chr1	4738354	4738355	rs2071991	A	G	0.0855	0.899788	-1.17762	-0.277835
chr1	4738677	4738678	rs2071995	C	T	0.0855	-0.854657	-1.12334	-1.978
chr1	4738857	4738858	rs61093582	C	T	0.0547	-0.917311	-1.11061	-2.02792
chr1	4738919	4738920	rs74697122	T	C	0.0308	-1.07361	-0.381215	-1.45482
chr1	4771018	4771019	rs72638835	G	T	0.0149	-1.49318	-1.07695	-2.57013
chr1	4771453	4771454	rs115333233	C	T	0.0616	-1.04916	-0.191154	-1.24031
chr1	4771694	4771695	rs989310	G	C	0.5487	-1.56848	0.137282	-1.4312
chr1	4796416	4796417	rs12566571	C	T	0.1262	-0.878693	-0.967451	-1.84614
chr1	4802274	4802275	rs145771561	GC	G	0.1571	-4.6553	3.28257	-1.37273
chr1	4814270	4814271	rs201437559	ATTCTAT	A	0.0179	-1.22448	-0.711918	-1.9364
chr1	4814507	4814508	rs413383	G	C	0.3489	1.14644	-1.66027	-0.513833
chr1	4823138	4823139	rs111622387	C	T	0.0179	1.34684	-2.6363	-1.28946
chr1	4838145	4838146	rs10915599	G	T	0.2803	0.882549	-2.23064	-1.34809
chr1	4856882	4856883	rs74490331	T	TG	0.0457	-1.88783	-0.684814	-2.57265
chr1	4856930	4856931	rs760816	A	G	0.8618	0.850786	-1.32902	-0.478234
chr1	4857176	4857177	rs6426435	C	T	0.0109	-1.82386	0.121583	-1.70228
chr1	4957368	4957369	rs58851741	C	T	0.1998	-1.13905	-1.1471	-2.28615
chr1	4999732	4999733	rs78194757	C	T	0.494	-0.85266	-0.957768	-1.81043
chr1	4999733	4999734	rs75554533	A	G	0.495	1.41694	-1.02721	0.389732
chr1	4999754	4999755	rs78733790	C	T	0.4563	1.15084	-2.58188	-1.43105
chr1	5023320	5023321	rs12754637	G	A	0.2167	-1.04002	-0.307183	-1.3472
chr1	5023429	5023430	rs6702660	A	G	0.7237	0.85217	-2.30313	-1.45096
chr1	5060674	5060675	rs540426638	C	T	0.0109	-0.970066	-0.5444	-1.51447
chr1	5246550	5246551	rs80281729	C	A	0.0338	-0.875699	-0.694343	-1.57004
chr1	5327648	5327649	rs2945620	A	G	0.7087	-0.921453	-1.30482	-2.22627
chr1	5333478	5333479	rs598031	G	A	0.7107	-1.01336	0.640208	-0.373154
chr1	5334994	5334995	rs12746867	G	A	0.0855	0.859587	-1.90824	-1.04865
chr1	5335169	5335170	rs55729623	C	G	0.3181	0.974686	-2.08224	-1.10755
chr1	5401167	5401168	rs76663244	C	T	0.0109	0.910111	-0.815576	0.094535
chr1	5401288	5401289	rs11576334	C	A	0.0865	-1.11815	-0.678312	-1.79646
chr1	5408738	5408739	rs140176190	C	T	0.0626	1.02635	-2.32083	-1.29449
chr1	5427250	5427251	rs141780001	A	C	0.0179	1.27211	-1.12861	0.143495
chr1	5430240	5430241	rs140747683	C	T	0.0139	0.899346	-2.33505	-1.4357
chr1	5454065	5454066	rs149979461	G	A	0.0457	-0.996198	-0.621728	-1.61793
chr1	5454095	5454096	rs144248510	A	G	0.0567	0.876592	-1.77668	-0.90009
chr1	5458870	5458871	rs36139907	G	T	0.3479	-2.13285	0.622014	-1.51084
chr1	5475662	5475663	rs6603835	C	A	0.6143	-0.961352	-1.48732	-2.44867
chr1	5483684	5483685	rs6660455	G	C	0.4612	1.93085	-3.30848	-1.37763
chr1	5516349	5516350	rs58293231	G	A	0.1074	-0.940879	-0.405023	-1.3459
chr1	5536730	5536731	rs150384070	CTT	C	0.0219	0.949399	-1.28836	-0.33896
chr1	5597077	5597078	rs78629467	A	G	0.0696	1.46851	-1.75652	-0.288006
chr1	5611539	5611540	rs2226157	C	G	0.4652	1.33036	-1.03755	0.292812
chr1	5611818	5611819	rs2211416	A	G	0.0686	-3.73109	2.30947	-1.42162
chr1	5612036	5612037	rs115235853	C	T	0.0239	-1.07382	-0.214895	-1.28872
chr1	5631454	5631455	rs115146518	C	T	0.0159	-1.08862	-0.856916	-1.94554
chr1	5658418	5658419	rs12139270	G	A	0.0765	-0.927051	-0.910419	-1.83747
chr1	5679221	5679222	rs10907205	G	A	0.1421	-0.943572	-0.729234	-1.67281
chr1	5679368	5679369	rs1587407	A	G	0.7535	1.40124	-1.69341	-0.292172
chr1	5682754	5682755	rs1775398	T	C	0.0527	1.04325	-1.70693	-0.66368
chr1	5682795	5682796	rs145649937	T	G	0.0129	1.18627	-1.46019	-0.273918
chr1	5716286	5716287	rs371436567	GA	G	0.3121	1.03253	-0.790959	0.241571
chr1	5721188	5721189	rs12091928	A	G	0.0119	1.07444	-0.520675	0.553765
chr1	5724939	5724940	rs707580	T	C	0.2555	-1.29696	-1.48111	-2.77807
chr1	5725008	5725009	rs707581	G	A	0.2455	-2.6267	2.21311	-0.413593
chr1	5728200	5728201	rs569761488	C	A	0.0557	2.3853	-3.68056	-1.29526
chr1	5728313	5728314	rs1628371	C	G	0.2296	-1.19389	-0.245052	-1.43894
chr1	5731665	5731666	rs2649068	T	C	0.1193	1.05143	-1.6445	-0.593071
chr1	5743195	5743196	rs7542260	C	T	0.0696	-1.19286	0.07551	-1.11735
chr1	5773641	5773642	rs770699	T	C	0.173	1.01162	-1.73867	-0.72705
chr1	5788123	5788124	rs72643046	C	T	0.1183	2.23358	-1.53675	0.696829
chr1	5788581	5788582	rs4845815	C	T	0.0517	1.99271	-2.63997	-0.647266
chr1	5805855	5805856	rs11260684	C	G	0.0358	1.76064	-3.01593	-1.2553
chr1	5813487	5813488	rs147657040	C	T	0.0179	-0.878094	-1.44272	-2.32081
chr1	5831117	5831118	rs4276922	A	G	0.0308	1.09193	-1.25831	-0.166382
chr1	5831711	5831712	rs4129515	T	C	0.1103	1.46752	-0.630247	0.837271
chr1	5840029	5840030	rs6698924	A	C	0.0179	2.45008	-3.97094	-1.52086
chr1	5856160	5856161	rs72643071	C	T	0.0189	1.19026	-0.79218	0.398079
chr1	5858299	5858300	rs7532629	A	C	0.9066	1.09149	-1.32775	-0.236257
chr1	5858942	5858943	rs6687650	G	T	0.7614	-1.06233	-1.51593	-2.57826
chr1	5907567	5907568	rs2455772	G	C	0.6799	-1.68143	-0.787189	-2.46862
chr1	5910706	5910707	rs11803626	C	T	0.0119	-0.881371	0.257426	-0.623944
chr1	5916627	5916628	rs12127179	C	T	0.0527	0.869921	-1.45868	-0.588759
chr1	5924517	5924518	rs115526767	G	A	0.0109	-1.53067	-0.56216	-2.09283
chr1	5925039	5925040	rs11121682	G	A	0.175	-1.24702	-0.660346	-1.90736
chr1	5941984	5941985	rs72630606	G	A	0.1918	-1.65731	-0.071868	-1.72918
chr1	5942034	5942035	rs72630607	G	A	0.2177	-1.36439	-0.553888	-1.91828
chr1	5950150	5950151	rs494611	A	G	0.0825	-0.863117	-0.626944	-1.49006
chr1	5958527	5958528	rs11577514	C	G	0.159	-1.47178	0.493728	-0.978052
chr1	5965380	5965381	rs12120967	C	T	0.1561	-1.60664	0.144773	-1.46187
chr1	5965454	5965455	rs571655	C	T	0.0189	0.945763	-0.651149	0.294614
chr1	5977847	5977848	rs74602695	A	T	0.0119	-2.18149	1.41163	-0.769854
chr1	6034001	6034002	rs4068400	G	A	0.66	0.957896	-2.36177	-1.40387
chr1	6038888	6038889	rs35766174	T	G	0.162	-2.12072	0.79816	-1.32256
chr1	6051878	6051879	rs186536883	G	A	0.0517	-1.57815	-1.08348	-2.66163
chr1	6052557	6052558	rs528566414	A	G	0.0239	-1.2018	0.516742	-0.68506
chr1	6085349	6085350	rs56224336	G	C	0.173	-0.915782	-1.04764	-1.96343
chr1	6094449	6094450	rs58801392	AG	A	0.2922	0.953872	-1.31349	-0.359622
chr1	6097449	6097450	rs1295089	G	A	0.9513	-1.02933	-1.25642	-2.28576
chr1	6101770	6101771	rs1295086	C	T	0.0885	-0.966682	-2.57691	-3.54359
chr1	6108011	6108012	rs115486743	T	C	0.0398	-0.870504	-2.3637	-3.2342
chr1	6108376	6108377	rs756096	C	A	0.1869	0.972438	-2.2773	-1.30486
chr1	6112785	6112786	rs12023920	T	G	0.2346	1.15987	-0.697788	0.462077
chr1	6118692	6118693	rs11576563	C	T	0.0169	1.48201	-2.57158	-1.08957
chr1	6125083	6125084	rs4908752	G	T	0.2316	-1.26803	-0.805553	-2.07358
chr1	6140553	6140554	rs11581252	G	A	0.2107	-1.46429	-0.463423	-1.92772
chr1	6142723	6142724	rs3747981	A	G	0.3101	-0.935192	0.217057	-0.718135
chr1	6147297	6147298	rs11583631	C	T	0.1421	-1.72744	1.36765	-0.35979
chr1	6147340	6147341	rs11584419	A	C	0.1431	1.34298	-3.10722	-1.76424
chr1	6158146	6158147	rs11586626	C	T	0.1392	-1.62003	-1.12687	-2.7469
chr1	6175416	6175417	rs114606171	C	T	0.0278	-1.24733	-1.39457	-2.6419
chr1	6175488	6175489	rs1883767	G	A	0.2614	-1.48892	-1.04124	-2.53016
chr1	6175506	6175507	rs6670822	G	C	0.2217	1.0011	-1.61335	-0.612247
chr1	6198468	6198469	rs2746064	C	T	0.0596	1.11553	-1.55382	-0.438294
chr1	6221974	6221975	rs747393	T	C	0.1779	0.860274	-2.44427	-1.58399
chr1	6243731	6243732	rs12143847	T	A	0.0636	1.52641	1.14907	2.67548
chr1	6243842	6243843	rs72853026	C	T	0.0636	1.51369	-1.15365	0.360043
chr1	6267310	6267311	rs12070308	C	T	0.0318	1.807	-2.94275	-1.13575
chr1	6279117	6279118	rs2092412	T	C	0.0408	1.36415	-1.98048	-0.616327
chr1	6282949	6282950	rs846110	T	G	0.0139	-1.14831	-0.493891	-1.6422
chr1	6296208	6296209	rs116431230	A	C	0.0865	-1.11434	-0.205877	-1.32022
chr1	6305291	6305292	rs61760836	C	A	0.6849	1.213	-0.91259	0.30041
chr1	6320582	6320583	rs1534996	T	C	0.7117	0.886258	-2.17245	-1.2862
chr1	6321699	6321700	rs113884827	T	TG	0.7107	0.983726	-3.24376	-2.26003
chr1	6333626	6333627	rs4908544	C	G	0.1024	1.0721	-1.53566	-0.463564
chr1	6337051	6337052	rs74049522	C	A	0.0298	1.65724	-1.76331	-0.106077
chr1	6340764	6340765	rs35934384	A	G	0.1203	0.909981	-1.95017	-1.04018
chr1	6350150	6350151	rs34647648	G	A	0.0984	-0.893618	-0.91318	-1.8068
chr1	6350579	6350580	rs61760848	G	C	0.0437	-0.96158	-2.34453	-3.30611
chr1	6350584	6350585	rs58640499	C	T	0.0497	1.97502	-3.0762	-1.10119
chr1	6360503	6360504	rs4908876	A	T	0.0845	-3.30252	2.26103	-1.04148
chr1	6367218	6367219	rs11121611	T	G	0.2068	-2.15355	-0.638806	-2.79236
chr1	6367363	6367364	rs56961204	A	G	0.0517	1.26903	-1.69414	-0.425105
chr1	6368825	6368826	rs3789495	C	G	0.0517	-2.17871	-0.956944	-3.13565
chr1	6410410	6410411	rs75027779	C	T	0.0378	2.40087	-3.30629	-0.905418
chr1	6411867	6411868	rs3789475	G	C	0.0229	-0.869628	-0.775046	-1.64467
chr1	6412036	6412037	rs3789474	C	T	0.0298	-0.919399	0.788599	-0.1308
chr1	6414083	6414084	rs11121699	A	G	0.1451	0.883015	0.443091	1.32611
chr1	6414536	6414537	rs2010905	A	T	0.0308	-0.995609	-0.46792	-1.46353
chr1	6445377	6445378	rs6143103	C	CTGAGGGTGGCCACT	0.0268	1.5711	-1.83607	-0.26497
chr1	6446207	6446208	rs6687830	G	C	0.0885	1.4487	-1.21438	0.234317
chr1	6453638	6453639	rs11542479	G	A	0.0895	0.859574	-2.91886	-2.05929
chr1	6453743	6453744	rs58125749	C	A	0.0746	0.93101	-1.69285	-0.761844
chr1	6464807	6464808	rs12067222	A	C	0.0219	-1.2084	-1.06401	-2.27241
chr1	6474534	6474535	rs142774957	C	T	0.0159	0.854926	-2.33972	-1.48479
chr1	6483582	6483583	rs932402	G	A	0.0348	-0.872898	-1.04371	-1.9166
chr1	6484684	6484685	rs112485021	G	A	0.0567	0.994295	-1.75348	-0.759189
chr1	6484788	6484789	rs192381885	T	C,G	0.0507	1.20164	-0.60399	0.597652
chr1	6490224	6490225	rs113421613	C	A	0.0586	1.23796	-2.04924	-0.811279
chr1	6490436	6490437	rs111914711	G	C	0.0586	1.44953	-1.20445	0.24508
chr1	6497201	6497202	rs6577576	C	T	0.0855	-1.00454	0.397108	-0.607428
chr1	6497386	6497387	rs33988115	GC	G	0.1819	-1.14457	-1.75927	-2.90384
chr1	6500603	6500604	rs544919788	C	CG	0.5427	1.75251	-0.12319	1.62932
chr1	6500659	6500660	rs4908552	C	A	0.0845	-1.55354	-0.41578	-1.96932
chr1	6505670	6505671	rs11121879	G	A	0.0467	1.88936	-2.80326	-0.913895
chr1	6508624	6508625	rs149033367	A	G	0.0666	1.53606	-1.76027	-0.224211
chr1	6520311	6520312	rs3138158	C	T	0.0934	1.15048	-1.15004	0.0004376
chr1	6520667	6520668	rs41278010	A	C	0.0358	-1.15555	-0.562153	-1.7177
chr1	6531123	6531124	rs61740145	T	C	0.0666	0.952554	-2.1474	-1.19485
chr1	6545838	6545839	rs6693457	C	T	0.1193	-1.78954	1.48181	-0.307729
chr1	6546984	6546985	rs12565527	A	G	0.0616	2.11905	-3.09977	-0.98072
chr1	6550504	6550505	rs11806429	C	T	0.1083	1.15898	-2.04621	-0.887231
chr1	6551691	6551692	rs3007429	C	T	0.0726	-1.15855	-0.0173743	-1.17593
chr1	6555484	6555485	rs113480314	G	T	0.0606	-1.07606	-1.03713	-2.11319
chr1	6557603	6557604	rs112475272	C	T	0.0109	-1.00361	-0.273692	-1.2773
chr1	6562783	6562784	rs2986747	A	G	0.1799	1.68194	-0.830176	0.851759
chr1	6575869	6575870	rs78032147	G	A	0.1083	-1.29916	-1.1797	-2.47886
chr1	6579606	6579607	rs1556035	C	T	0.8797	1.22407	-2.38173	-1.15766
chr1	6583700	6583701	rs10158949	T	C	0.8867	1.19651	-1.65428	-0.457772
chr1	6607198	6607199	rs10746502	T	C	0.8638	0.915892	-1.89789	-0.981998
chr1	6614534	6614535	rs4908923	G	A	0.8608	-0.913148	-1.75681	-2.66996
chr1	6657354	6657355	rs4587589	C	T	0.3529	1.06348	-2.01878	-0.955302
chr1	6657423	6657424	rs3866805	C	A	0.3678	1.26982	-1.25662	0.0131976
chr1	6663030	6663031	rs78728410	G	C	0.3201	1.21776	-2.47403	-1.25627
chr1	6663553	6663554	rs2232453	C	T	0.3549	-1.08236	-0.125438	-1.2078
chr1	6672728	6672729	rs11583755	A	C	0.3738	-1.44561	0.037495	-1.40811
chr1	6681743	6681744	rs3747994	C	T	0.7018	-1.53797	-0.0516962	-1.58967
chr1	6683239	6683240	rs14057	G	A	0.338	0.958174	-1.9864	-1.02823
chr1	6685773	6685774	rs12127191	C	T	0.332	-1.0336	-0.692339	-1.72594
chr1	6685850	6685851	rs12127219	C	A	0.6938	-1.67036	0.560379	-1.10998
chr1	6732567	6732568	rs3789572	G	T	0.3111	1.18497	-2.04904	-0.864069
chr1	6761701	6761702	rs3761925	C	T	0.2893	-0.927329	-0.866083	-1.79341
chr1	6822409	6822410	rs35916265	T	A	0.16	0.928307	-1.70169	-0.773383
chr1	6886307	6886308	rs17441375	A	C	0.1312	-0.87968	-1.14635	-2.02603
chr1	6920389	6920390	rs76259711	T	C	0.0139	-0.911612	-0.660698	-1.57231
chr1	6959601	6959602	rs201706677	G	A	0.0318	-1.08421	0.26694	-0.817265
chr1	6963268	6963269	rs77254260	C	A	0.1233	1.12218	-2.36421	-1.24203
chr1	6972392	6972393	rs11586867	C	T	0.5974	0.973592	-2.23726	-1.26367
chr1	6995978	6995979	rs7553914	C	G	0.7097	-1.8161	-0.362613	-2.17871
chr1	7014868	7014869	rs34204447	C	G	0.0467	-2.06785	-0.515528	-2.58338
chr1	7022565	7022566	rs6681640	G	C	0.4215	-1.84489	-0.110592	-1.95548
chr1	7058374	7058375	rs60700491	C	T	0.1392	-1.17568	-1.3621	-2.53778
chr1	7072725	7072726	rs7543531	C	T	0.326	-0.905458	1.94883	1.04337
chr1	7072897	7072898	rs139665384	C	T	0.0119	1.1158	-1.23289	-0.117097
chr1	7076183	7076184	rs4287204	G	A	0.2505	-1.06989	-1.79475	-2.86464
chr1	7078678	7078679	rs116747552	C	G	0.0139	-1.32986	-1.07478	-2.40463
chr1	7078953	7078954	rs6678589	C	T	0.0477	-1.01311	-0.96689	-1.98
chr1	7079062	7079063	rs6693691	T	C	0.5656	0.878952	-1.43321	-0.554262
chr1	7079605	7079606	rs112665083	G	A	0.0179	0.86736	-2.07558	-1.20822
chr1	7079761	7079762	rs11809898	G	A	0.1471	-1.31719	-1.65205	-2.96924
chr1	7120630	7120631	rs72857534	C	T	0.0189	-2.02978	-1.32727	-3.35706
chr1	7155995	7155996	rs10864280	C	G	0.2376	-1.00264	-0.215906	-1.21855
chr1	7169065	7169066	rs1005430	G	C	0.8897	-0.86356	-0.58072	-1.44428
chr1	7178130	7178131	rs9434846	A	G	0.3519	-2.45463	1.79018	-0.664457
chr1	7252365	7252366	rs11120876	C	T	0.165	-1.06962	-0.670162	-1.73978
chr1	7284770	7284771	rs76288140	C	A	0.0109	0.899482	-2.08451	-1.18503
chr1	7394727	7394728	rs12041403	C	T	0.5129	-0.867829	-1.10807	-1.9759
chr1	7394817	7394818	rs6691196	C	G	0.1243	-1.14776	-0.351067	-1.49883
chr1	7401143	7401144	rs74052945	A	T	0.0189	1.06565	-1.71973	-0.654075
chr1	7406804	7406805	rs845243	C	T	0.6312	0.976902	-1.4509	-0.473998
chr1	7426525	7426526	rs845268	T	C	0.7475	1.34465	-2.25187	-0.907214
chr1	7449143	7449144	rs114252003	C	T	0.1014	1.44617	-1.20491	0.241263
chr1	7449368	7449369	rs201314736	TGCA	T	0.6561	-1.51656	-0.0489753	-1.56554
chr1	7468613	7468614	rs763161	G	A	0.7614	-1.42454	-0.283223	-1.70776
chr1	7478923	7478924	rs845259	C	T	0.8946	-1.02329	-1.16621	-2.1895
chr1	7480369	7480370	rs845253	T	C	0.9006	1.26371	-1.75706	-0.493349
chr1	7514588	7514589	rs1193245	C	T	0.2952	-2.65371	-0.70569	-3.3594
chr1	7517838	7517839	rs12743474	C	T	0.0169	-1.91652	0.119195	-1.79733
chr1	7531203	7531204	rs75507805	A	G	0.0815	1.33267	-2.2498	-0.917134
chr1	7539173	7539174	rs75651384	G	A	0.0378	-0.945025	-0.194366	-1.13939
chr1	7540698	7540699	rs2693957	C	G	0.505	-1.046	0.0712212	-0.974783
chr1	7542238	7542239	rs115605943	C	T	0.0199	0.863996	-2.63316	-1.76916
chr1	7545566	7545567	rs7552815	G	T	0.0159	-1.63194	0.643197	-0.988742
chr1	7569186	7569187	rs4908464	G	C	0.162	-1.50254	-0.357887	-1.86043
chr1	7603449	7603450	rs1750823	T	C	0.7187	-2.75071	-0.909243	-3.65996
chr1	7604830	7604831	rs1750822	G	A	0.668	0.982585	-2.30938	-1.3268
chr1	7609214	7609215	rs60870420	G	A	0.0258	-1.85533	-0.160866	-2.0162
chr1	7609228	7609229	rs148649433	A	G	0.0249	-1.15452	-2.48337	-3.63789
chr1	7614758	7614759	rs78552027	G	A	0.0298	-0.908252	-0.564464	-1.47272
chr1	7646300	7646301	rs9988575	G	A	0.0527	-0.87277	-1.10426	-1.97703
chr1	7681742	7681743	rs7555394	G	A	0.1332	0.865154	-1.8892	-1.02405
chr1	7689388	7689389	rs10495758	T	C	0.1441	0.996354	-2.37769	-1.38133
chr1	7698517	7698518	rs111284644	T	G	0.0119	1.58427	-2.30356	-0.719287
chr1	7721950	7721951	rs112532394	C	T	0.0109	-2.29516	-1.64879	-3.94395
chr1	7729590	7729591	rs12736485	G	C	0.1083	1.11225	-2.19817	-1.08592
chr1	7730878	7730879	rs72853807	C	T	0.0537	1.26882	-3.33461	-2.06579
chr1	7740874	7740875	rs569111506	G	T	0.0139	-1.51673	-0.713827	-2.23056
chr1	7764089	7764090	rs181855669	G	A	0.0149	-1.5591	0.628271	-0.930825
chr1	7770900	7770901	rs2995034	C	T	0.4513	1.03971	-0.321806	0.717901
chr1	7798904	7798905	rs147570843	TA	T	0.1183	-2.41758	2.88974	0.472158
chr1	7831312	7831313	rs544911502	T	C	0.0646	-1.10448	-0.139895	-1.24438
chr1	7843709	7843710	rs571577	A	C	0.9145	2.71658	-0.846098	1.87049
chr1	7887578	7887579	rs228697	C	G	0.0964	1.67859	-2.82658	-1.14799
chr1	7887604	7887605	rs17031614	G	A	0.0189	-1.17234	-0.87673	-2.04907
chr1	7907983	7907984	rs4908485	A	G	0.1551	-1.27646	-1.1573	-2.43375
chr1	7922260	7922261	rs1776356	C	A	0.6978	-1.87584	-1.59057	-3.46641
chr1	7929818	7929819	rs228725	T	C	0.6372	0.899737	-1.12725	-0.227512
chr1	8014438	8014439	rs151329319	G	A	0.0159	-0.910247	-1.30172	-2.21196
chr1	8021909	8021910	rs200968609	GGTGCTGGACGGTGTCCCT	G	0.165	-0.850792	-1.34461	-2.1954
chr1	8121821	8121822	rs225106	T	C	0.6064	1.33551	-1.88289	-0.547383
chr1	8164455	8164456	rs10864328	G	C	0.3628	-1.04665	-0.383347	-1.43
chr1	8181226	8181227	rs12711516	G	C	0.3598	0.905292	-2.2854	-1.38011
chr1	8186984	8186985	rs116763516	G	A,C	0.0149	-0.888117	-0.931201	-1.81932
chr1	8187299	8187300	rs4908737	T	A	0.6879	-1.10147	-1.4973	-2.59877
chr1	8193790	8193791	rs6577471	A	G	0.6491	-1.00688	-0.00515179	-1.01203
chr1	8250206	8250207	rs79826603	A	C	0.0209	-0.981112	-1.56756	-2.54867
chr1	8252683	8252684	rs72859389	A	C	0.0487	0.916944	-1.77836	-0.86142
chr1	8263107	8263108	rs77905678	C	T	0.0119	-1.64491	-0.405374	-2.05028
chr1	8264283	8264284	rs61264263	G	T	0.0457	1.22669	-2.33722	-1.11053
chr1	8274764	8274765	rs411129	G	T	0.0626	-1.22488	-0.241159	-1.46604
chr1	8274770	8274771	rs385814	T	C	0.0626	-0.944191	0.13728	-0.806911
chr1	8275041	8275042	rs113677773	T	TGGG	0.0636	-1.49734	-0.264284	-1.76162
chr1	8284861	8284862	rs371782	A	G	0.9105	-0.890762	-0.478137	-1.3689
chr1	8310061	8310062	rs11583166	G	A	0.1243	-0.932003	-0.626683	-1.55869
chr1	8310157	8310158	rs72861200	C	G	0.0408	1.50639	-2.38135	-0.874965
chr1	8320044	8320045	rs389709	G	A	0.8111	-0.889142	-0.846276	-1.73542
chr1	8383777	8383778	rs11585805	C	G	0.2346	0.940288	-2.06698	-1.12669
chr1	8383986	8383987	rs72635796	G	C	0.1819	1.23716	-1.30973	-0.0725728
chr1	8392394	8392395	rs11586622	G	A	0.4901	-0.858597	-0.492511	-1.35111
chr1	8392445	8392446	rs11585385	T	G	0.2823	-1.0044	0.625668	-0.378731
chr1	8392519	8392520	rs11590467	C	T	0.4901	-0.932166	-1.15819	-2.09035
chr1	8402661	8402662	rs116338501	G	A	0.0109	-0.874448	0.36201	-0.512438
chr1	8403392	8403393	rs79500154	G	A	0.0159	1.17952	-1.10277	0.0767483
chr1	8407457	8407458	rs11588961	G	A	0.2833	0.866336	-2.30213	-1.4358
chr1	8413316	8413317	rs1058791	A	C	0.1899	0.984315	-1.18428	-0.199963
chr1	8419765	8419766	rs11581418	C	T	0.1352	1.02683	-1.44876	-0.421931
chr1	8423876	8423877	rs2289732	G	C	0.1968	-1.202	-0.138776	-1.34077
chr1	8424028	8424029	rs12118524	G	A	0.0328	1.20809	0.346804	1.55489
chr1	8455711	8455712	rs11121179	G	T	0.1948	-1.729	-0.609117	-2.33812
chr1	8482031	8482032	rs12095124	T	C	0.2147	-0.99734	-2.1989	-3.19624
chr1	8484822	8484823	rs301807	A	G	0.5278	2.41395	-1.51248	0.901472
chr1	8487326	8487327	rs115846081	T	C	0.0249	-1.59085	-0.639738	-2.23059
chr1	8503934	8503935	rs145986089	TGGCAGCCTCTGCCAA	T	0.2147	-2.81595	1.14784	-1.66811
chr1	8510576	8510577	rs301814	T	C	0.5855	1.10283	-1.70945	-0.606619
chr1	8510594	8510595	rs301813	T	C	0.8032	1.4329	-2.47959	-1.0467
chr1	8516393	8516394	rs200237252	GTACAC	G	0.0219	0.991587	-2.4974	-1.50581
chr1	8557319	8557320	rs7518608	C	G	0.5845	0.871716	-2.10975	-1.23804
chr1	8570830	8570831	rs70982787	A	AGCCC	0.2386	0.859418	-1.28516	-0.425746
chr1	8571708	8571709	rs13374834	A	G	0.0298	2.94616	-1.48631	1.45985
chr1	8651195	8651196	rs17386539	G	A	0.0149	-0.914627	0.0627015	-0.851925
chr1	8658084	8658085	rs11121205	G	A	0.5885	-1.71187	-0.369046	-2.08092
chr1	8699468	8699469	rs146526624	T	G	0.0119	-1.02042	-0.847482	-1.8679
chr1	8724521	8724522	rs10864360	C	T	0.5676	1.21134	-2.22205	-1.01071
chr1	8762356	8762357	rs7554486	G	A	0.5825	0.893852	-1.88479	-0.990942
chr1	8763349	8763350	rs182025879	C	A	0.0149	-1.88891	0.637308	-1.2516
chr1	8813242	8813243	rs7533113	C	T	0.8171	0.984022	-1.22017	-0.23615
chr1	8889347	8889348	rs2131677	C	A	0.8151	-0.864413	-0.0190639	-0.883477
chr1	8889351	8889352	rs7542102	T	C	0.2734	0.999938	-1.40214	-0.402202
chr1	8966337	8966338	rs4908792	A	T	0.3091	1.15327	-1.72805	-0.57478
chr1	8977903	8977904	rs201856509	TG	T	0.0268	1.40826	-3.60862	-2.20036
chr1	8977991	8977992	rs140313839	GGC	G	0.0686	0.8805	-1.09316	-0.21266
chr1	8978645	8978646	rs6668426	T	G	0.6252	-0.868598	-1.54006	-2.40866
chr1	8998366	8998367	rs914995	C	G	0.8439	-0.904694	-0.342147	-1.24684
chr1	8998612	8998613	rs2781086	C	A	0.0596	-3.5709	3.21416	-0.356737
chr1	9001766	9001767	rs12068037	C	T	0.0676	1.32956	-2.58188	-1.25232
chr1	9001960	9001961	rs12568902	T	A	0.8668	0.889193	-1.58288	-0.693683
chr1	9003736	9003737	rs112888980	C	CCCTTTCCTTCCT	0.7187	2.15003	-2.4627	-0.312673
chr1	9023365	9023366	rs72862209	C	T	0.0139	-1.72638	-0.0520446	-1.77842
chr1	9046642	9046643	rs7529173	A	T	0.335	-1.18317	-0.82653	-2.0097
chr1	9054583	9054584	rs10746482	G	A	0.3161	-0.94522	-0.749198	-1.69442
chr1	9065118	9065119	rs60512841	A	C	0.0974	1.7666	-1.06501	0.701587
chr1	9070183	9070184	rs79843700	C	T	0.0308	-2.38302	1.3135	-1.06952
chr1	9071124	9071125	rs11121294	C	T	0.3678	-1.07839	-0.190745	-1.26914
chr1	9117947	9117948	rs74595111	C	T	0.0755	-0.95894	-1.59324	-2.55218
chr1	9125397	9125398	rs72632934	G	A	0.0467	-0.853238	-0.487096	-1.34033
chr1	9127158	9127159	rs2478869	C	A	0.5875	-0.894554	-0.131907	-1.02646
chr1	9127370	9127371	rs2505974	T	C	0.0487	-1.08058	-1.29449	-2.37507
chr1	9127457	9127458	rs3765962	T	A	0.3022	-1.51762	1.13689	-0.380726
chr1	9129619	9129620	rs5438	C	T	0.0577	-1.12602	-0.547405	-1.67343
chr1	9139997	9139998	rs72632943	G	A	0.0219	-1.01218	-0.847961	-1.86014
chr1	9140326	9140327	rs12127491	C	T	0.2217	-1.15406	-0.642986	-1.79705
chr1	9146331	9146332	rs74051036	C	A	0.0139	-0.894967	-1.11251	-2.00748
chr1	9158452	9158453	rs149295123	C	T	0.0119	-1.15627	-1.14489	-2.30116
chr1	9159713	9159714	rs143925765	G	GGCCAGTGCAGATCTGCAAGTCAC,GGCCAGTGCAGATCTGCAAGTCAT	0.5169	1.1821	-2.34826	-1.16616
chr1	9161549	9161550	rs1061907	G	A	0.5358	1.06837	-1.95331	-0.884946
chr1	9161667	9161668	rs6661122	T	C	0.5358	1.11315	-2.74228	-1.62913
chr1	9170816	9170817	rs770029	T	C	0.6789	1.14813	-1.38507	-0.236942
chr1	9170877	9170878	rs770028	G	A	0.1372	-1.64791	0.350051	-1.29786
chr1	9182140	9182141	rs12144117	C	T	0.2117	-1.82538	-1.64022	-3.4656
chr1	9188143	9188144	rs76301303	C	G	0.0288	1.18095	-1.5195	-0.338542
chr1	9188676	9188677	rs61739938	T	C	0.0139	0.974632	-1.80072	-0.826092
chr1	9214275	9214276	rs150108739	A	AGGGAGGGCAAAGGTCAGTGGGGATGGT	0.7455	-3.62161	5.03636	1.41475
chr1	9243810	9243811	rs797257	G	T	0.662	-0.915393	-0.546973	-1.46237
chr1	9261850	9261851	rs549879479	T	TCCC	0.8151	1.03686	-0.946525	0.0903343
chr1	9293519	9293520	rs181782240	C	G	0.0119	-1.40601	-0.687761	-2.09377
chr1	9299946	9299947	rs2268176	T	G	0.2406	0.91378	-2.24147	-1.32769
chr1	9302842	9302843	rs75213162	C	T	0.0149	-1.92956	2.30167	0.372116
chr1	9304730	9304731	rs2239560	G	A	0.1501	2.08268	-1.69769	0.384992
chr1	9310039	9310040	rs763180	G	A	0.3907	-1.32408	-0.233216	-1.55729
chr1	9310654	9310655	rs9435155	T	C	0.3907	0.869459	-2.45119	-1.58173
chr1	9323456	9323457	rs731183	G	C	0.0875	0.850384	-2.34231	-1.49192
chr1	9329288	9329289	rs2071931	C	T	0.2306	-1.3925	0.172649	-1.21985
chr1	9335744	9335745	rs6688233	C	T	0.2624	-3.19543	2.5556	-0.639828
chr1	9353271	9353272	rs183711646	G	C	0.2266	-0.867392	-0.52279	-1.39018
chr1	9362958	9362959	rs577685	G	A	0.5159	-1.24209	-0.503412	-1.7455
chr1	9378577	9378578	rs4908530	C	T	0.6829	1.07217	-3.17505	-2.10288
chr1	9381728	9381729	rs11584306	T	A	0.2068	0.953609	-0.612353	0.341256
chr1	9393081	9393082	rs1294022	C	G	0.1223	1.55962	-1.34166	0.217958
chr1	9398987	9398988	rs72643833	G	T	0.0249	1.21556	-1.84843	-0.632868
chr1	9409488	9409489	rs34247124	C	T	0.5189	1.27116	-3.37516	-2.104
chr1	9413015	9413016	rs35779143	A	AG	0.2654	1.4255	-1.9165	-0.491002
chr1	9459861	9459862	rs58570666	G	A	0.16	-0.95583	-1.35177	-2.3076
chr1	9464797	9464798	rs11121405	A	T	0.5229	2.54724	-0.631513	1.91573
chr1	9501491	9501492	rs9662546	G	A	0.0905	2.0516	-2.54799	-0.496397
chr1	9509427	9509428	rs11121422	G	A	0.1561	-1.33614	0.418531	-0.917605
chr1	9509820	9509821	rs10779726	G	C	0.836	1.7465	-1.27195	0.474554
chr1	9526955	9526956	rs6695925	G	A	0.8002	-1.31504	1.61322	0.298177
chr1	9532962	9532963	rs74349986	C	T	0.0348	-1.96036	-1.03756	-2.99791
chr1	9533237	9533238	rs6679380	C	T	0.7664	-0.979968	-0.864606	-1.84457
chr1	9599118	9599119	rs72646714	A	T	0.1352	0.957424	-2.7916	-1.83417
chr1	9599647	9599648	rs112358601	C	T	0.172	1.55365	-2.96274	-1.40909
chr1	9599822	9599823	rs148840119	A	G	0.172	0.912978	-1.30101	-0.388032
chr1	9600367	9600368	rs72646715	C	T	0.17	1.01595	-2.10802	-1.09206
chr1	9633722	9633723	rs6540953	A	G	0.9761	1.85873	-2.37354	-0.514816
chr1	9664649	9664650	rs138697503	T	A	0.0219	0.858798	-1.53436	-0.67556
chr1	9704924	9704925	rs4129341	T	G	0.16	-1.0291	-0.770092	-1.79919
chr1	9708687	9708688	rs6540985	A	G	0.329	-0.976453	-0.449961	-1.42641
chr1	9712005	9712006	rs78800005	C	T	0.1978	-1.97983	-0.643753	-2.62358
chr1	9747742	9747743	rs74338407	C	T	0.0497	2.69988	-4.47744	-1.77756
chr1	9749934	9749935	rs9430648	T	G	0.4851	1.29279	-3.70166	-2.40887
chr1	9760650	9760651	rs12566637	C	T	0.0905	1.00517	-2.60086	-1.59569
chr1	9777585	9777586	rs28730669	G	C	0.0298	1.43109	-1.18988	0.241213
chr1	9779287	9779288	rs12564733	A	T	0.0726	-1.39649	1.4877	0.0912107
chr1	9790994	9790995	rs10779729	A	G	0.6312	1.10837	-2.06333	-0.954964
chr1	9791760	9791761	rs563222999	T	G	0.0507	0.95306	-1.70033	-0.747272
chr1	9813642	9813643	rs111367680	A	C	0.0706	1.19255	-2.42961	-1.23706
chr1	9815542	9815543	rs4512653	C	G	0.0596	-1.07724	-0.618135	-1.69538
chr1	9828867	9828868	rs4845975	T	C	0.0805	-1.07427	0.586641	-0.487633
chr1	9887627	9887628	rs6699320	T	C	0.0706	2.16187	-0.822429	1.33944
chr1	9903547	9903548	rs12725898	G	T	0.4751	-1.92496	-0.368829	-2.29379
chr1	9970470	9970471	rs112860082	G	A	0.1511	-1.85619	1.67673	-0.179465
chr1	9989080	9989081	rs72858090	G	A	0.0417	0.926458	-1.5432	-0.616738
chr1	9989576	9989577	rs186441781	C	T	0.0209	1.10635	-1.93965	-0.8333
chr1	10003228	10003229	rs7535945	G	A	0.0616	-0.875609	-0.0378372	-0.913447
chr1	10003456	10003457	rs2297843	G	C	0.0865	-0.879464	-0.32572	-1.20518
chr1	10051164	10051165	rs35232720	C	T	0.0666	-1.20873	-0.505647	-1.71437
chr1	10067228	10067229	rs151287323	C	A	0.0249	0.876499	-1.7526	-0.876101
chr1	10092769	10092770	rs6541075	T	A	0.1759	-1.26069	-0.714266	-1.97496
chr1	10112152	10112153	rs61782895	C	A	0.0129	1.13244	-2.91121	-1.77877
chr1	10211821	10211822	rs78193965	T	G	0.0219	-3.20527	2.86892	-0.336347
chr1	10213184	10213185	rs146360828	C	A	0.0109	-2.09324	0.855501	-1.23774
chr1	10215290	10215291	rs76119640	C	G	0.0149	1.11014	-1.39563	-0.285487
chr1	10230439	10230440	rs200025605	AT	A	0.0149	-1.03056	-1.2008	-2.23136
chr1	10241586	10241587	rs4846195	C	T	0.0746	-0.975012	-0.55735	-1.53236
chr1	10270401	10270402	rs116570550	G	A	0.0219	0.97339	-2.81598	-1.84259
chr1	10270525	10270526	rs6695456	C	T	0.0358	-1.18745	-0.819073	-2.00653
chr1	10271489	10271490	rs72864188	C	T	0.0408	1.013	-2.53519	-1.52219
chr1	10271627	10271628	rs79794661	G	C	0.0219	-1.48102	-0.257555	-1.73857
chr1	10302864	10302865	rs115767228	G	A	0.0239	-1.78535	-1.09189	-2.87724
chr1	10317878	10317879	rs12136404	A	G	0.4841	0.967674	-2.74121	-1.77354
chr1	10346202	10346203	rs4845932	C	T	0.3569	-1.17925	-1.05593	-2.23518
chr1	10346210	10346211	rs4845933	C	A	0.3052	2.58988	-1.97576	0.614124
chr1	10368281	10368282	rs141229777	G	C	0.0229	1.00942	-2.15718	-1.14776
chr1	10428451	10428452	rs12130563	G	A	0.338	-1.27082	-0.228328	-1.49914
chr1	10428569	10428570	rs77172218	G	A	0.0159	1.79544	-3.11298	-1.31754
chr1	10437391	10437392	rs552949106	C	G	0.0318	-1.06403	-0.798071	-1.8621
chr1	10448259	10448260	rs11121557	T	G	0.4861	1.73273	-1.72818	0.004543
chr1	10488313	10488314	rs505141	A	G	0.492	-1.13599	-0.796881	-1.93287
chr1	10489948	10489949	rs147415571	G	A	0.0328	1.12741	-2.44268	-1.31526
chr1	10490003	10490004	rs149377338	T	C	0.0209	0.896495	-1.42304	-0.526549
chr1	10490110	10490111	rs649101	T	C	0.492	0.858465	-2.07907	-1.2206
chr1	10490538	10490539	rs661256	G	C	0.0696	1.50819	-1.72246	-0.214266
chr1	10554793	10554794	rs620405	T	C	0.7087	1.76742	-2.61152	-0.844095
chr1	10567710	10567711	rs589151	C	T	0.5109	-2.00161	-0.124722	-2.12633
chr1	10574676	10574677	rs11587326	C	T	0.1213	-0.87071	-0.22822	-1.09893
chr1	10671321	10671322	rs77708413	C	T	0.1392	1.16135	-2.05892	-0.897572
chr1	10671322	10671323	rs517344	A	G	0.9523	0.852798	-1.94359	-1.09079
chr1	10691440	10691441	rs77603828	T	G	0.0308	-1.01373	0.0576324	-0.9561
chr1	10714293	10714294	rs56322140	G	C	0.0457	-1.52545	-1.07327	-2.59872
chr1	10714435	10714436	rs35604552	C	T	0.2684	-1.00744	-0.436508	-1.44394
chr1	10724420	10724421	rs72858535	C	T	0.0199	-1.68058	-1.3142	-2.99478
chr1	10728546	10728547	rs115689695	C	T	0.0348	-1.45839	-1.4938	-2.95219
chr1	10731928	10731929	rs77302518	G	A	0.0338	1.19569	-1.77404	-0.578343
chr1	10732265	10732266	rs188493533	C	G	0.0368	-1.07476	-0.180576	-1.25533
chr1	10732273	10732274	rs578345	G	C	0.5268	1.05057	-1.60798	-0.557415
chr1	10737561	10737562	rs284310	C	T	0.4622	-1.24563	-1.13495	-2.38058
chr1	10785126	10785127	rs146674281	G	C	0.0169	2.28857	-2.24112	0.0474537
chr1	10785958	10785959	rs12096029	C	G	0.0249	1.30062	-0.585645	0.714979
chr1	10795553	10795554	rs74052181	G	A	0.0179	-0.915191	-1.03148	-1.94667
chr1	10816216	10816217	rs6688219	C	T	0.0219	1.15054	-1.38376	-0.233219
chr1	10821481	10821482	rs148952952	G	T	0.0179	-1.34928	-1.18476	-2.53404
chr1	10825685	10825686	rs17035680	T	C	0.0755	1.5812	-1.58254	-0.0013404
chr1	10833231	10833232	rs58064215	C	G	0.7058	-1.43701	-1.33371	-2.77072
chr1	10834356	10834357	rs79787295	C	G	0.0249	1.1554	-1.98757	-0.832173
chr1	10834420	10834421	rs74773993	G	C	0.0388	-1.2188	-0.619677	-1.83848
chr1	10854072	10854073	rs12728592	C	A	0.0199	-2.53361	0.835658	-1.69795
chr1	10855314	10855315	rs11577258	C	T	0.0825	-1.16082	-0.734833	-1.89565
chr1	10855801	10855802	rs535140702	GC	G	0.0129	-0.873288	-0.0895238	-0.962812
chr1	10869811	10869812	rs60065955	A	G	0.1799	-0.904401	-0.805727	-1.71013
chr1	10880650	10880651	rs114724304	C	T	0.0159	-1.37491	-1.44503	-2.81994
chr1	10890418	10890419	rs769320	C	T	0.2545	-0.875211	-0.969521	-1.84473
chr1	10890428	10890429	rs769321	CA	C	0.0169	-1.58836	0.034061	-1.5543
chr1	10890703	10890704	rs1292656	C	T	0.5447	-3.48692	1.53368	-1.95325
chr1	10895937	10895938	rs115990223	G	T	0.0318	1.62453	-2.93365	-1.30912
chr1	10911819	10911820	rs181016240	G	C	0.0119	-0.895729	-0.822879	-1.71861
chr1	10917617	10917618	rs113246204	C	T	0.0219	-1.03924	-0.545848	-1.58509
chr1	10917961	10917962	rs61777380	G	C	0.2117	-0.966998	-0.397928	-1.36493
chr1	10920744	10920745	rs552630	C	A	0.7505	-1.05478	-1.85137	-2.90614
chr1	10926965	10926966	rs36047809	G	T	0.0427	-0.906467	-0.661782	-1.56825
chr1	10927116	10927117	rs35236487	G	A	0.0427	-1.38676	-1.28121	-2.66797
chr1	10958387	10958388	rs35841890	GC	G	0.3976	-0.96678	-1.73641	-2.70319
chr1	10970183	10970184	rs4845847	G	T	0.4155	-1.38003	1.03279	-0.347238
chr1	10986307	10986308	rs12748162	C	A	0.2565	1.24616	-2.43365	-1.1875
chr1	11010571	11010572	rs1122112	A	C	0.0427	-0.880878	-2.42905	-3.30992
chr1	11010852	11010853	rs1281009	G	A	0.0427	1.66436	-0.564404	1.09996
chr1	11012002	11012003	rs74225549	A	G	0.163	0.911435	-2.00987	-1.09844
chr1	11017608	11017609	rs7511959	T	C	0.2127	1.07839	-2.3187	-1.24031
chr1	11017616	11017617	rs34691090	G	C	0.2107	1.12878	-2.04237	-0.913589
chr1	11028147	11028148	rs6703255	A	G	0.2316	1.27062	-1.96134	-0.690721
chr1	11033796	11033797	rs6675082	T	C	0.2306	-0.880148	-1.56286	-2.443
chr1	11034194	11034195	rs12081186	T	C	0.2296	1.23802	-2.18795	-0.949932
chr1	11073322	11073323	rs61775597	A	C	0.173	1.98625	-2.06637	-0.0801236
chr1	11097546	11097547	rs116685064	C	A	0.0219	-1.2841	0.174729	-1.10937
chr1	11097547	11097548	rs114377430	G	A	0.0219	-1.11081	0.0574022	-1.0534
chr1	11112835	11112836	rs1884429	T	C	0.7734	-1.13438	0.123859	-1.01052
chr1	11115174	11115175	rs539233496	C	G	0.0696	1.41305	-1.40202	0.0110223
chr1	11127763	11127764	rs2261217	C	A	0.7416	-1.48506	-0.32736	-1.81242
chr1	11132560	11132561	rs2791649	A	G	0.7416	-1.35763	-1.67054	-3.02817
chr1	11182897	11182898	rs79171074	A	C	0.0537	1.01159	-1.12159	-0.110005
chr1	11192955	11192956	rs2275526	A	G	0.0249	0.931892	-2.42898	-1.49709
chr1	11194873	11194874	rs77086655	G	A	0.0477	0.96196	-1.6891	-0.72714
chr1	11195248	11195249	rs12116962	G	A	0.0258	-1.69915	-1.51603	-3.21517
chr1	11195282	11195283	rs12124629	C	G	0.0249	-2.05042	-0.939658	-2.99008
chr1	11322564	11322565	rs2295079	C	G	0.6899	1.77187	-2.90186	-1.12998
chr1	11322627	11322628	rs2295080	G	T	0.6889	-1.01271	-0.662202	-1.67491
chr1	11341051	11341052	rs115405820	C	T	0.0129	-1.11307	-0.968985	-2.08205
chr1	11397851	11397852	rs12060190	G	A	0.0497	-1.13754	-0.598223	-1.73576
chr1	11469785	11469786	rs12066382	T	A	0.0179	0.890034	-1.23086	-0.340828
chr1	11519215	11519216	rs6696039	C	T	0.9801	1.00181	-0.908929	0.0928848
chr1	11519272	11519273	rs12141532	A	G	0.0209	0.945179	-1.32138	-0.3762
chr1	11544187	11544188	rs79769841	A	G	0.0348	1.23377	-1.03451	0.19926
chr1	11655441	11655442	rs4356057	G	A	0.172	-1.10094	-1.09941	-2.20035
chr1	11672088	11672089	rs72636881	C	T	0.0994	-1.15135	-1.70456	-2.85591
chr1	11672500	11672501	rs6704310	T	C	0.8062	1.22497	-2.33251	-1.10755
chr1	11675309	11675310	rs11121780	C	T	0.7922	-1.27212	-0.386589	-1.65871
chr1	11680660	11680661	rs149465015	G	A	0.0249	-0.95132	-1.11876	-2.07008
chr1	11695955	11695956	rs4636464	C	T	0.8201	1.00299	-1.92758	-0.92459
chr1	11696316	11696317	rs12760507	G	A	0.0318	-1.01653	-0.833003	-1.84953
chr1	11725205	11725206	rs3117064	T	A	0.4692	-1.00843	-0.787446	-1.79587
chr1	11727919	11727920	rs1985120	T	C	0.2584	0.897842	-1.80925	-0.91141
chr1	11741795	11741796	rs2233006	T	A	0.3757	-1.36372	-0.260142	-1.62387
chr1	11761467	11761468	rs1534990	A	C	0.7276	0.869282	-1.90779	-1.03851
chr1	11761823	11761824	rs1534987	T	C	0.7276	1.11216	-1.29019	-0.178025
chr1	11764650	11764651	rs72872012	G	A	0.0596	-0.890711	0.161867	-0.728843
chr1	11767937	11767938	rs12134785	T	C	0.0974	-1.79711	0.478858	-1.31825
chr1	11790449	11790450	rs34860946	T	C	0.325	2.21578	-3.60839	-1.39261
chr1	11791906	11791907	rs57315755	CTTTT	C	0.3757	1.37333	0.232133	1.60546
chr1	11797185	11797186	rs12095517	T	C	0.6014	0.851872	-1.51151	-0.659636
chr1	11798734	11798735	rs17875916	A	T	0.3101	1.23223	-1.55533	-0.323096
chr1	11809401	11809402	rs11121820	T	G	0.3241	-1.00524	-0.426503	-1.43174
chr1	11809414	11809415	rs17875991	C	T	0.0169	-0.854974	1.08554	0.23057
chr1	11809692	11809693	rs17875957	C	G	0.0109	1.83621	-2.74002	-0.903815
chr1	11823155	11823156	rs10864535	A	G	0.2714	1.27297	-2.26761	-0.994637
chr1	11831874	11831875	rs55929441	A	G	0.1014	1.20029	-2.6136	-1.41331
chr1	11832622	11832623	rs77157935	C	G	0.0646	1.65443	-2.26425	-0.60982
chr1	11832658	11832659	rs61773953	A	G	0.1809	1.85848	-1.46267	0.395806
chr1	11845221	11845222	rs55867221	T	C	0.1024	0.869868	-1.57537	-0.705506
chr1	11845523	11845524	rs2151654	G	A	0.1034	-0.973649	-0.247425	-1.22107
chr1	11847739	11847740	rs35562212	CCT	C	0.0199	-1.00344	0.823163	-0.180276
chr1	11857925	11857926	rs45608437	G	A	0.1799	-1.44783	-0.969116	-2.41695
chr1	11865816	11865817	rs45594036	C	A	0.0408	-1.01602	-1.78506	-2.80108
chr1	11866182	11866183	rs13306560	C	T	0.0408	-0.858089	-0.418699	-1.27679
chr1	11881946	11881947	rs113289271	C	CAG	0.1402	0.957479	-0.99304	-0.0355609
chr1	11905850	11905851	rs61764044	A	G	0.0646	1.15024	-2.48012	-1.32988
chr1	11905994	11905995	rs5066	C	A	0.0467	1.13941	-2.66528	-1.52587
chr1	11908166	11908167	rs17376426	C	T	0.0477	-0.998624	-1.43844	-2.43706
chr1	11919270	11919271	rs198389	A	G	0.4135	1.09817	-2.7255	-1.62733
chr1	11932677	11932678	rs34593006	G	A	0.3588	1.06275	-1.10956	-0.0468104
chr1	11934475	11934476	rs34293975	G	T	0.0477	-0.984852	0.0227529	-0.962099
chr1	11940482	11940483	rs4846068	C	T	0.5497	-2.25056	1.23212	-1.01844
chr1	11940627	11940628	rs71647011	C	T	0.0467	-1.07896	0.817825	-0.261138
chr1	11941321	11941322	rs77562907	G	A	0.0159	1.13106	-1.6417	-0.510632
chr1	11941409	11941410	rs12732635	C	T	0.0457	-1.42855	-0.501558	-1.93011
chr1	11941483	11941484	rs2336395	G	T	0.162	-0.886494	-1.23778	-2.12428
chr1	11942818	11942819	rs12724385	T	C	0.0358	-1.25416	0.00975014	-1.24441
chr1	11946572	11946573	rs2050267	G	A	0.3658	1.78195	-2.56496	-0.783015
chr1	11954344	11954345	rs541373515	T	TAAAGTTGCAGCTGGA	0.0775	1.43483	-2.24074	-0.805909
chr1	11959084	11959085	rs77685402	G	A	0.0537	1.08952	-3.08837	-1.99885
chr1	11959237	11959238	rs57044570	C	G	0.3429	1.65615	-3.41686	-1.76071
chr1	11967904	11967905	rs6662295	G	C	0.5457	1.71613	-0.708218	1.00791
chr1	11986534	11986535	rs61776480	G	A	0.4563	-0.851979	0.842585	-0.00939394
chr1	11995175	11995176	rs1208984	A	G	0.3917	1.00214	-0.879883	0.122257
chr1	11999123	11999124	rs7513651	C	T	0.0755	1.07834	-1.61976	-0.541424
chr1	11999555	11999556	rs6682230	G	A	0.0835	1.06817	-1.46202	-0.393852
chr1	12004150	12004151	rs12564031	G	A	0.0865	-1.18889	-1.61118	-2.80007
chr1	12004400	12004401	rs75197209	C	T	0.0378	0.893069	-1.98332	-1.09026
chr1	12004415	12004416	rs113232254	C	A	0.0109	-1.12163	-1.00068	-2.12231
chr1	12004818	12004819	rs142782618	G	A	0.0189	-1.3009	0.333555	-0.967348
chr1	12006851	12006852	rs116837743	C	T	0.0109	0.981637	-1.82112	-0.839483
chr1	12009457	12009458	rs77138768	A	C	0.0746	-1.99825	-2.30149	-4.29974
chr1	12012979	12012980	rs58495963	G	A	0.3191	-0.941077	0.560309	-0.380768
chr1	12013199	12013200	rs113868586	C	T	0.0606	0.966896	-2.25843	-1.29153
chr1	12046062	12046063	rs2336384	G	T	0.6571	-1.2228	0.0733904	-1.14941
chr1	12046088	12046089	rs873458	G	A	0.5268	-1.55794	0.369664	-1.18828
chr1	12062360	12062361	rs2236058	C	G	0.6143	1.60584	-2.67406	-1.06822
chr1	12080121	12080122	rs74052928	G	C	0.1412	0.981254	-3.66552	-2.68426
chr1	12100941	12100942	rs71647030	A	T	0.0934	-1.73519	-0.0620078	-1.7972
chr1	12113557	12113558	rs11121852	C	T	0.2097	-1.21766	-0.558258	-1.77592
chr1	12164390	12164391	rs11569850	G	C	0.0666	-2.41326	-0.834162	-3.24743
chr1	12192893	12192894	rs576389338	CAAAAAAAAAAAAA	C	0.0557	-1.37716	-1.10126	-2.47842
chr1	12196147	12196148	rs1201118	G	A	0.6223	-0.961851	-0.943383	-1.90523
chr1	12221626	12221627	rs143584067	G	A	0.0129	1.02875	-2.1088	-1.08005
chr1	12224302	12224303	rs684014	C	A	0.1193	-1.59778	-1.2672	-2.86498
chr1	12230080	12230081	rs17883094	G	A	0.0189	1.83247	-3.26717	-1.43469
chr1	12234210	12234211	rs541177343	T	C	0.0219	-1.03542	-1.75643	-2.79186
chr1	12235170	12235171	rs5745967	G	A	0.0249	-1.32798	-0.0160498	-1.34403
chr1	12235723	12235724	rs17881148	C	G	0.0249	-1.0044	-2.09159	-3.09599
chr1	12240721	12240722	rs5745987	T	G	0.0199	-1.12728	-0.907786	-2.03506
chr1	12246174	12246175	rs474247	C	T	0.2237	-1.78977	0.262412	-1.52736
chr1	12249019	12249020	rs1815530	C	T	0.2167	-1.31313	-1.18988	-2.50301
chr1	12331614	12331615	rs235227	G	A	0.1421	-1.2456	-0.898823	-2.14442
chr1	12399350	12399351	rs141258085	A	G	0.0109	1.71221	-1.24243	0.469779
chr1	12514937	12514938	rs144908738	T	A	0.0129	-0.954811	-1.07584	-2.03065
chr1	12514938	12514939	rs151170965	T	A	0.0129	-2.09622	-0.992161	-3.08838
chr1	12534151	12534152	rs151268803	G	A	0.0109	-1.05878	-1.44901	-2.50779
chr1	12541183	12541184	rs115037374	C	T	0.0109	-1.88975	0.886907	-1.00284
chr1	12570619	12570620	rs189156818	T	C	0.0378	0.946613	-1.03628	-0.0896699
chr1	12573581	12573582	rs72869547	G	A	0.0368	-1.1319	0.364829	-0.767075
chr1	12588705	12588706	rs4846106	A	G	0.0736	1.20076	-2.03642	-0.835662
chr1	12604994	12604995	rs6541026	T	C	0.6948	-0.877822	-1.28178	-2.1596
chr1	12607135	12607136	rs12568438	G	T	0.0417	1.19009	-2.84372	-1.65364
chr1	12609085	12609086	rs10864559	T	C	0.9314	0.877107	-1.64807	-0.770961
chr1	12609972	12609973	rs76589131	A	G	0.0517	1.18945	-2.26587	-1.07643
chr1	12614256	12614257	rs115164428	C	T	0.0159	-1.22059	-0.781868	-2.00246
chr1	12626209	12626210	rs6541038	C	A	0.337	1.46776	-1.43096	0.0368006
chr1	12626260	12626261	rs6541039	T	C	0.337	2.54851	-2.60463	-0.0561222
chr1	12633051	12633052	rs55991483	C	G	0.0825	1.23724	-1.46742	-0.230186
chr1	12633101	12633102	rs77155474	C	T	0.0447	1.38056	-2.05126	-0.670702
chr1	12633464	12633465	rs79708184	C	T	0.0447	-1.10608	-0.538238	-1.64432
chr1	12655889	12655890	rs190914209	C	T	0.0179	-1.10607	-1.10004	-2.20611
chr1	12656207	12656208	rs142941548	TG	T	0.4881	-1.42156	0.428612	-0.992943
chr1	12656834	12656835	rs10864573	T	C	0.4881	1.06446	-1.20925	-0.144791
chr1	12657815	12657816	rs112319506	G	A	0.0199	1.08461	-2.27579	-1.19118
chr1	12657973	12657974	rs115997464	C	A	0.0239	-0.923672	-0.216703	-1.14037
chr1	12660341	12660342	rs78807871	G	A	0.1103	1.86851	-2.57217	-0.703659
chr1	12660419	12660420	rs55728759	T	C	0.3628	-1.08861	-1.16459	-2.2532
chr1	12660598	12660599	rs12711523	C	T	0.6402	0.969618	-1.9768	-1.00718
chr1	12661420	12661421	rs12136952	G	C	0.33	-0.882436	-0.522782	-1.40522
chr1	12676837	12676838	rs70987261	AG	A	0.8131	-1.09153	-0.0795933	-1.17113
chr1	12678189	12678190	rs114161112	G	A	0.0398	1.55145	-2.26788	-0.716435
chr1	12695719	12695720	rs61777487	A	G	0.0159	-1.14775	-1.10274	-2.25049
chr1	12704481	12704482	rs74057606	G	A	0.0159	-1.50247	-0.207846	-1.71031
chr1	12704488	12704489	rs145331925	G	A	0.0159	-0.983693	-0.400613	-1.38431
chr1	12719434	12719435	rs2256895	A	G	0.0338	-0.98187	-1.48171	-2.46358
chr1	12738441	12738442	rs116794853	T	G	0.0109	-1.23984	-1.50079	-2.74063
chr1	12738756	12738757	rs2255965	A	C	0.0736	1.00598	-1.68653	-0.680544
chr1	12776160	12776161	rs80277373	G	A	0.0427	-1.03069	-1.01659	-2.04728
chr1	13183421	13183422	rs28564063	T	C	0.0915	-1.30481	-0.563342	-1.86815
chr1	13783606	13783607	rs147095126	A	AAT	0.1153	1.039	-1.88653	-0.847526
chr1	13789277	13789278	rs77677348	T	C	0.0964	-1.56015	-1.21331	-2.77347
chr1	13789337	13789338	rs61781198	C	T	0.0239	-1.11256	-0.314513	-1.42708
chr1	13820450	13820451	rs164949	G	A	0.1034	0.877252	-1.76169	-0.884434
chr1	13831376	13831377	rs12733022	C	T	0.0577	-0.972222	-0.637776	-1.61
chr1	13851114	13851115	rs4372244	T	C	0.3678	1.62652	-2.73651	-1.11
chr1	13861653	13861654	rs75684979	T	G	0.0398	2.03627	-1.57326	0.46301
chr1	13863105	13863106	rs74707400	T	G	0.0398	-1.11887	-0.938696	-2.05756
chr1	13870795	13870796	rs404265	G	C	0.2575	-1.67339	-1.09023	-2.76363
chr1	13903600	13903601	rs355014	T	C	0.499	0.943009	-2.03108	-1.08807
chr1	13931701	13931702	rs2993692	A	G	0.1948	1.10444	-1.36043	-0.255989
chr1	13967571	13967572	rs4661997	T	C	0.0736	1.63992	-0.953706	0.686219
chr1	13967843	13967844	rs4661998	T	G	0.0736	0.874217	-1.56658	-0.692359
chr1	13967853	13967854	rs4661999	T	C	0.0736	0.954076	-2.23977	-1.2857
chr1	13969175	13969176	rs11801826	A	T	0.0736	2.46573	-2.13478	0.330953
chr1	13969219	13969220	rs78109137	C	A	0.0736	-1.53059	-0.0639951	-1.59459
chr1	13992267	13992268	rs61775075	G	A	0.0169	-1.15462	-0.950998	-2.10562
chr1	14050238	14050239	rs78095306	A	G	0.0209	0.950955	-2.1921	-1.24114
chr1	14050563	14050564	rs2495050	T	C	0.0169	2.01686	-1.45	0.566853
chr1	14095653	14095654	rs41269799	C	T	0.0129	2.80524	-4.64427	-1.83903
chr1	14118976	14118977	rs116702257	A	C	0.0169	-1.1795	-0.454845	-1.63434
chr1	14128112	14128113	rs2281167	G	A	0.0199	-1.07321	-1.41518	-2.4884
chr1	14133890	14133891	rs77815537	C	T	0.0219	-1.6891	-1.16667	-2.85577
chr1	14278580	14278581	rs10803437	T	A	0.1074	-0.907024	-0.276173	-1.1832
chr1	14323109	14323110	rs2005499	T	C	0.1441	-1.89946	1.15027	-0.749199
chr1	14347673	14347674	rs2359906	C	G	0.498	-2.50371	3.52382	1.02011
chr1	14382126	14382127	rs55986908	G	A	0.2227	0.990728	-2.22278	-1.23205
chr1	14394224	14394225	rs715340	C	T	0.1074	-1.5594	-0.989541	-2.54894
chr1	14439208	14439209	rs13374167	A	G	0.2753	1.94141	-1.90936	0.0320565
chr1	14461675	14461676	rs6683140	G	C	0.5706	-1.06537	-0.271577	-1.33695
chr1	14467196	14467197	rs147801886	C	T	0.0239	-1.70668	-1.51577	-3.22244
chr1	14475891	14475892	rs111719154	A	G	0.1054	0.982113	-2.16432	-1.18221
chr1	14511097	14511098	rs12563497	G	A	0.0527	-0.867203	-0.778205	-1.64541
chr1	14625431	14625432	rs7527299	A	G	0.5805	-2.11599	-0.804215	-2.9202
chr1	14687946	14687947	rs35138169	A	T	0.0606	-0.903612	-1.11309	-2.0167
chr1	14691874	14691875	rs28698594	G	C	0.0706	1.27958	-1.67553	-0.39595
chr1	14691977	14691978	rs142676312	C	T	0.0119	-0.987411	-0.0169968	-1.00441
chr1	14703853	14703854	rs11590846	C	T	0.3191	1.05684	-2.73382	-1.67698
chr1	14718956	14718957	rs7527767	C	T	0.3022	-1.77397	-0.668624	-2.44259
chr1	14722509	14722510	rs12401863	A	G	0.1928	0.895622	-2.47252	-1.57689
chr1	14761671	14761672	rs6680164	C	T	0.4294	1.23888	-1.06195	0.176922
chr1	14806286	14806287	rs143211826	G	A	0.0239	-1.44701	0.559755	-0.887258
chr1	14887404	14887405	rs10927464	T	G	0.6262	-2.32408	0.223801	-2.10028
chr1	14917674	14917675	rs113700934	C	A,T	0.0129	-1.44054	-1.2825	-2.72304
chr1	14920942	14920943	rs2486778	C	G	0.7624	-0.928414	-1.52417	-2.45258
chr1	14925104	14925105	rs1295787	T	G	0.7714	1.29124	-1.86528	-0.574035
chr1	14987319	14987320	rs61673144	A	G	0.0169	0.933323	-1.43068	-0.497353
chr1	14993117	14993118	rs34333856	A	G	0.1889	-1.31085	-0.59889	-1.90974
chr1	15007632	15007633	rs9787225	G	A	0.4692	-1.12407	0.0276157	-1.09645
chr1	15009819	15009820	rs1883661	T	C	0.5099	1.05542	-2.24884	-1.19342
chr1	15014105	15014106	rs10737900	G	A	0.504	-0.86744	-0.216253	-1.08369
chr1	15058577	15058578	rs56758486	G	A	0.171	-2.14035	1.09911	-1.04124
chr1	15152716	15152717	rs60243828	A	T	0.0239	-0.966481	-0.772627	-1.73911
chr1	15162401	15162402	rs78049388	C	G	0.0437	-2.54491	2.24469	-0.300221
chr1	15162549	15162550	rs59399254	C	G	0.0915	1.20012	-3.54552	-2.3454
chr1	15162639	15162640	rs78437744	G	C	0.0457	0.961496	-2.27567	-1.31417
chr1	15167900	15167901	rs537262726	CAAAAAAAAAAAAAAAAAA	C	0.9632	-1.13423	-0.958181	-2.09241
chr1	15178711	15178712	rs78317465	A	G	0.0537	-1.57517	-0.295164	-1.87033
chr1	15178794	15178795	rs61773566	G	A	0.0606	1.22122	-2.47645	-1.25523
chr1	15231608	15231609	rs61773601	C	T	0.1312	1.25693	-2.0396	-0.782676
chr1	15272686	15272687	rs12036609	C	T	0.1362	-0.850678	-1.32961	-2.18029
chr1	15288332	15288333	rs6676281	A	G	0.2704	1.47253	-3.25035	-1.77782
chr1	15314734	15314735	rs12562381	C	T	0.2604	1.25317	-2.62238	-1.36921
chr1	15314777	15314778	rs12568025	G	C	0.2575	1.00367	-1.03088	-0.027209
chr1	15322581	15322582	rs74060145	G	C	0.0646	1.10514	-2.78784	-1.6827
chr1	15322962	15322963	rs72639818	G	C	0.0129	1.05255	-2.45284	-1.40028
chr1	15331285	15331286	rs12048071	A	G	0.1819	1.28926	-2.13146	-0.842201
chr1	15331298	15331299	rs78579428	A	G	0.1074	-0.877948	-0.7098	-1.58775
chr1	15331315	15331316	rs112959513	G	GT	0.1799	-1.27677	-1.42782	-2.70459
chr1	15347653	15347654	rs10927633	G	C	0.7346	-0.92346	-1.53948	-2.46294
chr1	15354140	15354141	rs74960082	G	A	0.0159	2.27195	-1.75121	0.520737
chr1	15362542	15362543	rs35163828	C	G	0.499	-0.869198	-0.670687	-1.53988
chr1	15362625	15362626	rs189187300	C	T	0.0437	0.877797	-2.04915	-1.17135
chr1	15362693	15362694	rs78496177	C	T	0.1044	0.896759	-1.02786	-0.131098
chr1	15373377	15373378	rs10927657	G	T	0.338	0.989418	-2.11111	-1.12169
chr1	15403022	15403023	rs11581663	C	T	0.0467	-0.898168	-1.34384	-2.24201
chr1	15403035	15403036	rs10927668	C	T	0.2823	0.997688	-2.25804	-1.26035
chr1	15417122	15417123	rs116456725	G	A	0.0119	-1.31725	-1.33388	-2.65114
chr1	15427544	15427545	rs76202116	T	G	0.0507	1.20187	-2.33564	-1.13377
chr1	15443630	15443631	rs72640735	C	G	0.1948	-2.60968	-1.37467	-3.98435
chr1	15455306	15455307	rs55949759	T	C	0.1322	2.12046	-3.39509	-1.27462
chr1	15468777	15468778	rs72640763	A	C	0.1769	-0.998973	-0.753471	-1.75244
chr1	15479263	15479264	rs2312401	C	A	0.4155	-0.898209	0.603675	-0.294534
chr1	15479264	15479265	rs2312402	G	A	0.4155	-2.60121	0.573451	-2.02776
chr1	15480025	15480026	rs5772620	G	GC	0.7515	-0.885358	-0.955734	-1.84109
chr1	15480678	15480679	rs145695656	G	A	0.0139	-0.858385	0.413429	-0.444955
chr1	15494828	15494829	rs6688174	G	T	0.1431	0.876342	-2.83051	-1.95417
chr1	15504402	15504403	rs10927698	T	G	0.4205	0.993128	-1.66883	-0.675698
chr1	15504519	15504520	rs35885122	T	G	0.1421	-1.16225	0.74539	-0.416859
chr1	15504784	15504785	rs761298	A	C	0.2087	-1.20439	-0.689488	-1.89388
chr1	15505381	15505382	rs17381857	G	A	0.0885	-1.15207	0.107965	-1.0441
chr1	15505639	15505640	rs34498370	TG	T	0.1859	0.917431	-1.59531	-0.677877
chr1	15506074	15506075	rs4661591	G	T	0.9871	-0.921396	-1.42166	-2.34306
chr1	15514845	15514846	rs72642311	A	G	0.2177	1.80547	0.435939	2.24141
chr1	15514887	15514888	rs72642312	T	C	0.2177	1.70558	-2.1603	-0.454716
chr1	15518173	15518174	rs10927710	G	A	0.1322	-1.17259	-1.0981	-2.27069
chr1	15518236	15518237	rs113059619	A	AG	0.4195	0.859617	-1.20892	-0.3493
chr1	15518695	15518696	rs56404681	G	C	0.0109	1.19715	-2.05062	-0.853465
chr1	15522110	15522111	rs61482262	G	C	0.2197	-1.83873	0.339989	-1.49874
chr1	15522149	15522150	rs17382471	G	C	0.1322	0.904743	-0.981907	-0.0771642
chr1	15525041	15525042	rs111878717	T	C	0.0288	1.46606	-2.16085	-0.694787
chr1	15528486	15528487	rs2050233	G	A	0.7714	1.03809	-0.698736	0.339353
chr1	15541398	15541399	rs3753317	A	G	0.163	1.27141	-1.56259	-0.291178
chr1	15541406	15541407	rs3753316	C	T	0.3489	0.959875	-1.6241	-0.664227
chr1	15545009	15545010	rs10927734	A	T	0.174	0.864642	-2.34944	-1.4848
chr1	15552195	15552196	rs34085817	TGA	T	0.1292	-1.04948	-0.277932	-1.32741
chr1	15553394	15553395	rs12563699	G	C	0.168	-2.12271	1.51812	-0.604589
chr1	15573757	15573758	rs1780597	G	A	0.3767	-1.59925	0.37539	-1.22386
chr1	15588179	15588180	rs10927750	T	C	0.3857	0.863939	-1.19492	-0.330981
chr1	15599024	15599025	rs75432354	G	A	0.164	-0.921298	-1.25741	-2.17871
chr1	15599163	15599164	rs6703582	G	C	0.5696	1.32225	-2.89114	-1.56889
chr1	15599364	15599365	rs10803374	A	G	0.5726	0.957802	-1.90942	-0.951616
chr1	15613477	15613478	rs536364	G	A	0.5895	-0.875266	-1.16929	-2.04456
chr1	15631445	15631446	rs142812176	TGTC	T	0.3052	-1.02046	-1.88262	-2.90308
chr1	15639580	15639581	rs10489962	A	G	0.0567	0.927122	-1.97598	-1.04886
chr1	15663943	15663944	rs11582833	C	T	0.0477	-0.958177	-1.07341	-2.03158
chr1	15664409	15664410	rs149995345	C	T	0.0219	-1.1285	-0.378156	-1.50666
chr1	15682869	15682870	rs34757443	AG	A	0.0119	-0.865144	-0.502648	-1.36779
chr1	15697182	15697183	rs876295	A	G	0.329	1.38924	-2.59973	-1.21048
chr1	15709974	15709975	rs6673066	C	T	0.0239	-1.45091	-1.36159	-2.81251
chr1	15710225	15710226	rs55823174	C	T	0.0288	1.52316	-3.26399	-1.74082
chr1	15715809	15715810	rs115622161	C	T	0.0119	-0.99615	-2.26768	-3.26383
chr1	15715942	15715943	rs570569622	C	CAAAAAAAA	0.2584	1.06784	-2.2746	-1.20676
chr1	15728138	15728139	rs12562864	G	T	0.2545	-1.00071	-0.669518	-1.67023
chr1	15733925	15733926	rs11577345	T	C	0.1451	-0.872262	-0.189907	-1.06217
chr1	15736054	15736055	rs71631726;rs140124965	G	A,GC	0.1431	-0.877562	0.070736	-0.806826
chr1	15742806	15742807	rs2496322	G	C	0.2962	-0.882733	0.0453323	-0.8374
chr1	15744056	15744057	rs7529567	G	T	0.1163	-1.39174	-0.778887	-2.17063
chr1	15744286	15744287	rs67861674	C	T	0.1233	-0.861984	-0.491689	-1.35367
chr1	15757665	15757666	rs10754889	G	A	0.3598	1.26027	-1.09478	0.165488
chr1	15809427	15809428	rs12139377	C	T	0.2416	0.920156	-3.27498	-2.35482
chr1	15851675	15851676	rs4645980	C	A	0.5139	-1.53031	1.4725	-0.0578073
chr1	15909894	15909895	rs6429758	A	G	0.5278	1.34197	-1.73682	-0.394848
chr1	15911030	15911031	rs10927808	T	G	0.5278	1.42512	-3.0027	-1.57757
chr1	15921451	15921452	rs114439549	C	T	0.0318	-0.972202	-1.00199	-1.9742
chr1	15921898	15921899	rs76000735	A	AC	0.2674	-1.47031	-1.08794	-2.55824
chr1	16018275	16018276	rs16851946	T	G	0.0328	-0.854398	-1.75137	-2.60576
chr1	16023964	16023965	rs75022594	G	A	0.0119	-0.906453	0.775046	-0.131406
chr1	16044928	16044929	rs35757484	A	G	0.1889	-1.12963	-2.14986	-3.27949
chr1	16044944	16044945	rs12091644	G	A	0.2445	-1.10125	-0.109989	-1.21124
chr1	16047725	16047726	rs12734937	T	C	0.2445	1.31344	-1.87554	-0.562099
chr1	16067773	16067774	rs150257583	C	T	0.0139	-0.877007	-0.260594	-1.1376
chr1	16076202	16076203	rs11580509	T	C	0.341	1.15299	-1.90253	-0.749546
chr1	16090897	16090898	rs6429774	G	A	0.3509	0.880682	-1.92205	-1.04137
chr1	16092492	16092493	rs114285195	C	T	0.0586	-2.04609	-1.25264	-3.29873
chr1	16092748	16092749	rs115326302	C	G	0.0616	2.05011	-1.36286	0.68725
chr1	16111013	16111014	rs144567113	C	T	0.0199	-1.41597	-0.764873	-2.18084
chr1	16115332	16115333	rs1472554	C	G	0.4235	0.903806	-1.92167	-1.01786
chr1	16142201	16142202	rs111843207	C	G	0.0209	-1.16621	0.754869	-0.411346
chr1	16142402	16142403	rs12029984	A	G	0.4483	0.880594	-1.93611	-1.05552
chr1	16212218	16212219	rs4661670	G	T	0.0616	-0.868215	-0.748721	-1.61694
chr1	16288527	16288528	rs11806925	G	A	0.0785	-0.990542	-1.48639	-2.47694
chr1	16292741	16292742	rs848199	C	T	0.5507	-1.09135	-1.12955	-2.2209
chr1	16321522	16321523	rs4661681	T	C	0.0696	0.971977	-2.05556	-1.08358
chr1	16330815	16330816	rs1763617	C	T	0.1581	0.919026	-2.71974	-1.80072
chr1	16339312	16339313	rs10927886	C	G	0.3936	1.15841	-2.22542	-1.06701
chr1	16340216	16340217	rs113462795	A	AACAGTGCTTGGC	0.5915	1.34944	-0.12322	1.22622
chr1	16344401	16344402	rs945416	G	A	0.5934	-1.40592	-1.04704	-2.45296
chr1	16344682	16344683	rs872221	C	T	0.0716	0.864326	-1.01145	-0.147128
chr1	16346247	16346248	rs3754324	G	C	0.0845	2.02899	-2.66059	-0.6316
chr1	16346270	16346271	rs56879303	C	T	0.0746	-1.24205	0.0211084	-1.22095
chr1	16353399	16353400	rs9442216	T	C	0.675	1.34499	-1.66309	-0.318098
chr1	16359253	16359254	rs67833669	G	A	0.0537	-1.00777	-0.674298	-1.68207
chr1	16373774	16373775	rs2863439	A	C	0.1064	1.05742	-1.73149	-0.67407
chr1	16382648	16382649	rs12756714	T	C	0.4443	1.02816	-1.52405	-0.495885
chr1	16382717	16382718	rs12048851	T	C	0.4414	-0.98804	-1.7965	-2.78454
chr1	16382729	16382730	rs12030469	C	T	0.4374	-1.82015	0.574231	-1.24591
chr1	16382830	16382831	rs61769890	T	A	0.4433	-2.50874	-0.359276	-2.86801
chr1	16382833	16382834	rs61769891	T	A	0.4433	-1.1089	-0.114374	-1.22327
chr1	16382876	16382877	rs7517792	A	G	0.7932	1.69904	-2.17628	-0.477241
chr1	16391567	16391568	rs79926666	G	A	0.0318	-1.35817	-1.59989	-2.95806
chr1	16395028	16395029	rs10803419	G	T	0.498	-0.900513	-0.725107	-1.62562
chr1	16400003	16400004	rs138505952	C	A	0.0189	-1.07858	-0.352391	-1.43097
chr1	16408819	16408820	rs4077113	G	C	0.1849	1.64947	-3.11544	-1.46598
chr1	16411015	16411016	rs34568113	GCCT	G	0.7197	-1.05828	-0.796184	-1.85446
chr1	16415340	16415341	rs4661353	T	C	0.7048	3.15863	-4.69537	-1.53674
chr1	16415660	16415661	rs28638141	G	A	0.171	-1.39171	0.511517	-0.880197
chr1	16415895	16415896	rs78403305	C	T	0.0775	0.956251	-2.07774	-1.12149
chr1	16446979	16446980	rs17416878	A	G	0.339	1.35122	-2.39342	-1.04221
chr1	16447203	16447204	rs10796409	T	C	0.9871	1.83397	-2.07126	-0.237293
chr1	16454833	16454834	rs72887923	G	C	0.0696	-1.44553	0.0344251	-1.41111
chr1	16455142	16455143	rs4661707	T	C	0.9682	1.57548	-0.9019	0.673585
chr1	16465403	16465404	rs11260744	C	T	0.0895	0.937861	-1.07539	-0.137525
chr1	16472833	16472834	rs3754333	C	A	0.0696	-0.965168	-0.45861	-1.42378
chr1	16481250	16481251	rs558609049	CAAAAAAAAAAA	C	0.1928	-1.00606	-1.03581	-2.04186
chr1	16492020	16492021	rs12408442	T	C	0.4066	-1.3733	-0.554882	-1.92818
chr1	16492060	16492061	rs68124406	C	A	0.0408	2.78437	-2.37816	0.406209
chr1	16494014	16494015	rs4661357	C	G	0.9443	2.00775	-3.12905	-1.12131
chr1	16502255	16502256	rs6603888	C	G	0.334	0.951083	-1.56479	-0.613703
chr1	16508533	16508534	rs12057222	A	G	0.6113	0.956988	-1.66181	-0.704818
chr1	16532802	16532803	rs221050	G	A	0.2654	0.884552	-2.22897	-1.34441
chr1	16533021	16533022	rs221052	C	T	0.7406	-1.33764	-0.279737	-1.61738
chr1	16533816	16533817	rs170234	T	C	0.2654	-1.58138	-0.871055	-2.45244
chr1	16570838	16570839	rs6683278	T	C	0.335	1.39203	-2.39655	-1.00452
chr1	16575342	16575343	rs41301993	C	T	0.0159	-1.34968	-0.932058	-2.28174
chr1	16620159	16620160	rs2994142	T	C	0.7584	1.247	-1.93754	-0.690544
chr1	16645594	16645595	rs4661737	T	C	0.334	1.13526	-1.4872	-0.351937
chr1	16667540	16667541	rs11260731	G	C	0.3141	1.2339	-2.07707	-0.843169
chr1	16720111	16720112	rs10907225	T	C	0.332	-0.987789	-1.14194	-2.12973
chr1	16720116	16720117	rs144937376	G	A	0.0328	-1.02678	-0.243156	-1.26994
chr1	16760036	16760037	rs11260757	C	T	0.2644	-1.75522	-1.40896	-3.16418
chr1	16761255	16761256	rs138561484	CA	C	0.0308	0.863602	-1.4773	-0.613696
chr1	16767358	16767359	rs114024565	A	G	0.0765	1.10327	-1.71282	-0.60955
chr1	16802532	16802533	rs115349413	G	A	0.0716	-1.1783	-0.528088	-1.70639
chr1	16804340	16804341	rs156847	G	A	0.6938	-1.18913	-1.34994	-2.53907
chr1	16810032	16810033	rs202117117	GC	G	0.0179	2.34788	-3.11746	-0.769573
chr1	16810075	16810076	rs41269207	C	T	0.0646	-0.89863	-0.305018	-1.20365
chr1	16810300	16810301	rs281827	T	C	0.5328	1.25593	-0.439649	0.816279
chr1	16812401	16812402	rs277449	A	G	0.9573	1.88083	-2.96595	-1.08512
chr1	16825606	16825607	rs156863	A	T	0.3161	1.51305	-1.14545	0.3676
chr1	16826295	16826296	rs10492988	C	G	0.3012	-0.860929	-0.326289	-1.18722
chr1	16833194	16833195	rs61769468	G	C	0.4284	1.34466	-1.87653	-0.531876
chr1	16840940	16840941	rs376667525	TC	T	0.3042	-1.08896	-0.0209211	-1.10989
chr1	16841099	16841100	rs157256	A	G	0.6223	-0.99675	1.73746	0.740706
chr1	16841214	16841215	rs180705486	G	T	0.0209	-0.875518	-1.57142	-2.44694
chr1	16847189	16847190	rs277460	G	C	0.5368	-1.64542	-0.721675	-2.3671
chr1	16847604	16847605	rs58985935	G	T	0.0726	-0.929286	-1.72653	-2.65582
chr1	16847831	16847832	rs277462	T	C	0.5974	1.48264	-1.97334	-0.4907
chr1	16859375	16859376	rs11485886	G	A	0.0109	1.29517	-1.85208	-0.556912
chr1	16867483	16867484	rs61082357	C	CA	0.4016	-1.19473	-0.530083	-1.72481
chr1	16892564	16892565	rs202086630	G	A	0.0467	1.16691	-2.43185	-1.26494
chr1	16939172	16939173	rs367848378	C	T	0.0159	-1.19267	-0.369123	-1.56179
chr1	16939716	16939717	rs9329437	G	C	0.6272	1.06618	-2.70194	-1.63576
chr1	16939839	16939840	rs199508907	A	AC	0.0348	1.00204	-0.874189	0.127854
chr1	16947626	16947627	rs557398636	C	G	0.0417	2.13045	-2.12146	0.0089924
chr1	16956467	16956468	rs1762951	A	T	0.4364	0.945037	-1.99481	-1.04977
chr1	16957973	16957974	rs9729611	G	C	0.0487	-2.11665	-1.2461	-3.36275
chr1	16958063	16958064	rs1622521	A	G	0.6083	1.23502	-2.08359	-0.84857
chr1	16958423	16958424	rs11590312	G	C	0.2177	-0.933852	-1.42998	-2.36384
chr1	16971189	16971190	rs28468375	C	T	0.0358	0.961442	-0.925108	0.0363336
chr1	16971861	16971862	rs10796422	A	G	0.2763	-1.10892	-1.1908	-2.29972
chr1	16971865	16971866	rs2224812	G	T	0.6302	-1.12154	-0.887699	-2.00924
chr1	16975437	16975438	rs201921002	C	G	0.0447	-1.28466	-0.978169	-2.26283
chr1	16984009	16984010	rs201771886	G	C	0.4911	-2.05989	-1.23268	-3.29257
chr1	17026651	17026652	rs139977165	C	A	0.0457	2.26524	-3.25558	-0.990345
chr1	17026802	17026803	rs567371	C	T	0.6779	-0.893976	0.288667	-0.605309
chr1	17027316	17027317	rs190892467	G	C	0.0477	-0.908751	-1.12144	-2.03019
chr1	17034040	17034041	rs2743505	T	C	0.7982	-1.11281	0.369044	-0.743769
chr1	17034454	17034455	rs140689885	CGCGCGCGT	C	0.2028	-1.14904	-0.481131	-1.63018
chr1	17036309	17036310	rs621119	C	T	0.4443	-1.42545	-1.18135	-2.6068
chr1	17036311	17036312	rs557593933	T	C	0.0517	2.13019	-0.882088	1.2481
chr1	17036447	17036448	rs9659915	C	T	0.2167	1.17772	-1.48126	-0.303537
chr1	17045668	17045669	rs151167161	G	A	0.0189	-1.15629	-1.24083	-2.39712
chr1	17051623	17051624	rs67153740	G	T	0.0258	-1.34543	0.512519	-0.832908
chr1	17053815	17053816	rs2419165	C	G	0.3032	-2.69919	-0.846214	-3.5454
chr1	17053823	17053824	rs5016504	A	T	0.3032	1.24791	-1.93602	-0.688108
chr1	17054303	17054304	rs60083128	G	C	0.0398	1.23754	-2.25517	-1.01764
chr1	17055120	17055121	rs2610583	G	C	0.5457	0.907049	-1.95018	-1.04313
chr1	17055598	17055599	rs2990556	A	G	0.3111	1.18577	-2.02506	-0.839288
chr1	17084814	17084815	rs11260922	G	A	0.6272	1.12472	-0.384057	0.740661
chr1	17092181	17092182	rs546790757	AG	A	0.0547	1.10253	-2.82269	-1.72016
chr1	17193440	17193441	rs145637472	C	CT	0.504	-1.21158	-0.436858	-1.64843
chr1	17199726	17199727	rs555777834	C	CA	0.0129	-1.97532	-0.0839017	-2.05922
chr1	17215932	17215933	rs28711566	C	T	0.0477	-0.855405	0.329136	-0.526269
chr1	17216079	17216080	rs3738618	T	C	0.2356	1.37429	-2.44324	-1.06895
chr1	17216134	17216135	rs6684252	G	C	0.7972	1.67331	-2.37439	-0.701078
chr1	17216243	17216244	rs71644016	C	T	0.0348	-1.02067	-0.822288	-1.84296
chr1	17222652	17222653	rs67606166	CT	C	0.9036	-0.876867	0.139095	-0.737772
chr1	17222895	17222896	rs4562613	G	C	0.4573	1.01187	-2.31832	-1.30645
chr1	17223267	17223268	rs184459522	C	A	0.0149	-1.49434	-0.291445	-1.78578
chr1	17223325	17223326	rs12746410	G	T	0.4225	-0.874353	-0.258486	-1.13284
chr1	17231275	17231276	rs116382697	G	C	0.0229	0.939043	-1.61515	-0.676111
chr1	17231742	17231743	rs12140356	C	T	0.8976	-0.975887	-0.857205	-1.83309
chr1	17231750	17231751	rs71512926	T	C	0.8986	1.0502	-2.11994	-1.06974
chr1	17231760	17231761	rs79224975	A	G	0.6362	0.884737	-1.49373	-0.608989
chr1	17231893	17231894	rs71003299	T	TCCTTAGCGGATCCTTGGTAACGCTA	0.8936	0.988883	-1.41497	-0.426085
chr1	17236385	17236386	rs79678917	A	C	0.0477	1.18471	-2.11912	-0.934403
chr1	17236476	17236477	rs149742900	T	C	0.0577	-2.63759	9.04663	6.40903
chr1	17240550	17240551	rs150160215	TCCCCGCCCCGTGGCGGGGACG	T	0.502	-1.53039	1.07466	-0.455723
chr1	17256849	17256850	rs147451230	C	T	0.0179	-0.953283	-1.10952	-2.06281
chr1	17263188	17263189	rs189337269	G	A	0.0109	-1.05082	0.306282	-0.74454
chr1	17265600	17265601	rs146792981	C	T	0.0447	0.876325	-1.21615	-0.339827
chr1	17266354	17266355	rs371835878	G	GC	0.0239	1.01971	-2.3745	-1.35479
chr1	17266615	17266616	rs56247222	A	G	0.0507	1.1513	-2.39233	-1.24102
chr1	17272579	17272580	rs200713245	T	TC	0.0517	-1.10704	-0.856894	-1.96394
chr1	17275053	17275054	rs6698564	G	C	0.2922	2.62889	-4.01466	-1.38576
chr1	17275101	17275102	rs12081151	C	G	0.1004	1.64098	-1.74382	-0.102844
chr1	17280642	17280643	rs201353323	T	C	0.0477	1.0353	-0.696673	0.338627
chr1	17289910	17289911	rs6691985	C	T	0.3101	-0.92626	-1.49418	-2.42044
chr1	17293659	17293660	rs12097163	G	C	0.8012	-1.90244	0.935742	-0.966702
chr1	17293891	17293892	rs12757283	G	A	0.169	-1.07731	-0.10765	-1.18496
chr1	17306869	17306870	rs55750792	G	A	0.495	-1.34301	0.24146	-1.10155
chr1	17311534	17311535	rs138786667	C	G	0.0159	-2.23428	0.0252677	-2.20901
chr1	17313282	17313283	rs56146840	C	T	0.0189	-0.932134	0.0610118	-0.871122
chr1	17336252	17336253	rs6662202	C	T	0.2078	-1.34049	-0.904323	-2.24481
chr1	17342782	17342783	rs11203280	G	T	0.3549	-1.51347	-1.04569	-2.55916
chr1	17370119	17370120	rs11203285	T	C	0.5159	0.972033	-1.33367	-0.361637
chr1	17371754	17371755	rs10887994	G	C	0.5159	1.07707	-1.40994	-0.332865
chr1	17389408	17389409	rs2746541	C	T	0.0815	-2.36538	-0.825424	-3.1908
chr1	17389579	17389580	rs11203290	C	T	0.325	-1.45232	-0.226226	-1.67855
chr1	17389580	17389581	rs74350117	G	A	0.0586	-0.924371	-0.195068	-1.11944
chr1	17389979	17389980	rs2746540	A	G	0.9722	2.22723	-3.44384	-1.21661
chr1	17390068	17390069	rs2746539	G	A	0.0825	-2.22588	-2.06152	-4.2874
chr1	17392285	17392286	rs11203292	G	A	0.8907	-0.966917	-0.410992	-1.37791
chr1	17402115	17402116	rs3818035	G	T	0.6561	-1.10626	-0.826389	-1.93265
chr1	17402118	17402119	rs552169675	T	G	0.0149	1.02279	-1.1986	-0.175808
chr1	17402254	17402255	rs3818032	C	T	0.6561	-1.16961	-1.57023	-2.73983
chr1	17485550	17485551	rs6681946	G	A	0.7654	-1.30325	0.0115192	-1.29173
chr1	17503417	17503418	rs3003453	C	T	0.2724	-2.18847	-0.104374	-2.29285
chr1	17511771	17511772	rs3003461	C	T	0.333	-0.944723	-1.05175	-1.99648
chr1	17511784	17511785	rs3003462	C	T	0.332	0.995231	-1.25905	-0.26382
chr1	17533467	17533468	rs12138305	A	G	0.3241	1.28237	-2.42985	-1.14748
chr1	17534309	17534310	rs4384275	C	T	0.3171	1.22785	-2.96762	-1.73977
chr1	17557425	17557426	rs2977236	C	G	0.4254	-1.94732	1.86737	-0.079951
chr1	17560194	17560195	rs35408430	C	T	0.3618	-1.16587	-0.46652	-1.63239
chr1	17560645	17560646	rs12026071	T	C	0.2306	-2.02256	-2.05063	-4.07318
chr1	17600821	17600822	rs11203346	A	G	0.1759	1.28874	-1.87498	-0.586244
chr1	17601164	17601165	rs11585357	C	T	0.1759	0.855961	-0.840619	0.0153425
chr1	17646525	17646526	rs2147333	C	T	0.9105	-0.919364	-1.04999	-1.96936
chr1	17676773	17676774	rs72637425	A	G	0.2853	0.89462	-2.27906	-1.38444
chr1	17676968	17676969	rs12752914	T	C	0.0358	1.11601	-2.00583	-0.889822
chr1	17677045	17677046	rs74632628	C	A	0.0199	1.30488	-2.85193	-1.54705
chr1	17688038	17688039	rs4920370	T	C	0.4851	-1.3173	-0.787275	-2.10457
chr1	17703692	17703693	rs1204864	G	T	0.0368	-0.86968	-1.83752	-2.7072
chr1	17721387	17721388	rs6691485	C	T	0.6153	-1.57843	0.281428	-1.29701
chr1	17735999	17736000	rs541326107	C	T	0.0109	-1.18791	-0.319406	-1.50732
chr1	17750262	17750263	rs12728891	G	C	0.0885	0.987122	-1.29175	-0.304631
chr1	17754533	17754534	rs147976281	G	A	0.0199	-1.01168	-1.07543	-2.08711
chr1	17763516	17763517	rs2800687	A	G	0.6054	1.47945	-1.53278	-0.0533268
chr1	17811702	17811703	rs12726884	C	T	0.5477	-1.62113	-0.375819	-1.99695
chr1	17820741	17820742	rs6689677	C	A	0.6223	-2.26955	1.66346	-0.60609
chr1	17871836	17871837	rs75174468	C	T	0.0239	-1.0642	-1.17569	-2.23989
chr1	17878369	17878370	rs72643592	A	G	0.1451	-1.61968	-0.570774	-2.19045
chr1	17878781	17878782	rs2243576	T	G	0.0547	-1.10778	-1.02063	-2.12841
chr1	17888307	17888308	rs71644057	G	C	0.0318	0.859737	-2.29012	-1.43038
chr1	17900973	17900974	rs7516512	A	G	0.1392	0.863137	-1.43747	-0.574333
chr1	17914845	17914846	rs1193343	C	T	0.84	-1.43671	-0.914899	-2.35161
chr1	17932066	17932067	rs10492992	C	T	0.0547	-1.14154	-0.91265	-2.05419
chr1	17962581	17962582	rs149874779	G	A	0.0119	1.09087	-2.2085	-1.11763
chr1	17966504	17966505	rs80087840	G	A	0.0308	-2.31047	0.449055	-1.86141
chr1	17970755	17970756	rs3753379	T	C	0.1521	1.19334	-1.31027	-0.116938
chr1	17980529	17980530	rs71644062	C	T	0.161	0.862462	-2.42282	-1.56036
chr1	17996312	17996313	rs150199284	G	T	0.0179	2.95708	-4.36045	-1.40337
chr1	18013834	18013835	rs6672069	G	C	0.172	-1.12206	-0.0432353	-1.1653
chr1	18027973	18027974	rs111249337	G	A	0.0169	-1.48759	-0.275004	-1.7626
chr1	18090200	18090201	rs4920633	A	G	0.3429	-1.70515	-1.43306	-3.13821
chr1	18097352	18097353	rs11203459	G	A	0.3479	-1.02736	-0.981042	-2.0084
chr1	18103533	18103534	rs12121439	A	G	0.3439	-0.95642	-1.16642	-2.12284
chr1	18114105	18114106	rs74227546	G	A	0.0358	-0.947393	-0.733687	-1.68108
chr1	18114204	18114205	rs55857489	C	T	0.1074	1.0929	-1.77654	-0.683647
chr1	18199651	18199652	rs588987	T	C	0.675	-1.21569	-0.845423	-2.06111
chr1	18199827	18199828	rs912103	T	C	0.1968	-1.91287	0.789579	-1.12329
chr1	18199859	18199860	rs72651115	G	A	0.0249	-1.23918	-0.809993	-2.04917
chr1	18247810	18247811	rs7554885	G	T	0.2048	2.75747	-3.84413	-1.08666
chr1	18249742	18249743	rs12092756	C	T	0.3807	1.09766	-2.60635	-1.50869
chr1	18277479	18277480	rs659810	G	A	0.8608	-0.882507	-0.738607	-1.62111
chr1	18328507	18328508	rs76961111	G	T	0.834	-1.99204	0.540339	-1.4517
chr1	18359435	18359436	rs75821012	G	A	0.0139	-1.01818	-0.505889	-1.52407
chr1	18359579	18359580	rs12067141	G	A	0.2435	-1.27792	-0.299861	-1.57778
chr1	18387262	18387263	rs77043045	T	A	0.0567	1.19784	-1.52235	-0.324511
chr1	18387309	18387310	rs9659407	G	A	0.2565	-1.02624	-2.59157	-3.6178
chr1	18393196	18393197	rs76561268	G	T	0.0437	-2.75467	0.365098	-2.38957
chr1	18393490	18393491	rs12067991	C	G	0.504	1.3642	-2.95375	-1.58955
chr1	18393494	18393495	rs79127486	C	T	0.0437	1.40501	-3.01164	-1.60664
chr1	18427030	18427031	rs12740505	G	A	0.5129	-1.14862	-0.621497	-1.77012
chr1	18427444	18427445	rs75918217	C	T	0.162	-1.01662	-0.430669	-1.44729
chr1	18430941	18430942	rs35334068	A	T	0.2684	-0.882533	-0.744349	-1.62688
chr1	18431500	18431501	rs12724674	G	A	0.0268	-1.08387	0.0220134	-1.06186
chr1	18435767	18435768	rs34016995	C	G	0.0268	-1.01317	-0.742434	-1.75561
chr1	18437653	18437654	rs12136260	T	C	0.8479	-1.16956	1.09366	-0.0758936
chr1	18442736	18442737	rs35800064	C	T	0.2783	-2.35484	-1.03293	-3.38777
chr1	18459401	18459402	rs11261082	T	C	0.9761	2.81308	-2.83854	-0.0254627
chr1	18466044	18466045	rs75698402	G	C	0.165	-1.21435	-0.744697	-1.95905
chr1	18475787	18475788	rs72655121	G	A	0.0388	1.12878	-2.45587	-1.32709
chr1	18476230	18476231	rs9727948	T	C	0.3549	-1.63976	-0.840018	-2.47978
chr1	18493075	18493076	rs11802233	G	A	0.1928	-0.965572	-0.973898	-1.93947
chr1	18497902	18497903	rs12735570	T	C	0.0865	-1.14691	1.48663	0.339717
chr1	18583211	18583212	rs223181	T	C	0.2157	0.934774	-2.2913	-1.35652
chr1	18627375	18627376	rs223164	C	G	0.0795	0.8497	-0.97554	-0.12584
chr1	18645858	18645859	rs139026929	A	C	0.0169	-2.60193	0.900086	-1.70185
chr1	18646215	18646216	rs17362289	C	G	0.0467	0.948606	-1.76578	-0.817174
chr1	18655389	18655390	rs4920312	G	A	0.4304	-1.56418	-1.10831	-2.67249
chr1	18696214	18696215	rs882916	A	G	0.7565	1.10885	-1.70066	-0.591809
chr1	18699950	18699951	rs10907306	A	T	0.7555	1.54111	-0.559263	0.981845
chr1	18700011	18700012	rs11583062	G	T	0.1044	0.873696	-1.79824	-0.924548
chr1	18700090	18700091	rs71645411	C	T	0.1083	1.64169	-2.79702	-1.15533
chr1	18722712	18722713	rs1336130	T	C	0.4423	-1.66695	0.785132	-0.881818
chr1	18722800	18722801	rs1533623	G	A	0.7922	-1.18232	-0.34706	-1.52938
chr1	18806858	18806859	rs67957569	C	T	0.1223	1.22618	-2.77076	-1.54458
chr1	18807338	18807339	rs2992756	T	C	0.4881	1.8192	-1.41759	0.401611
chr1	18807535	18807536	rs7512414	G	T	0.1233	-0.854209	-0.349839	-1.20405
chr1	18884330	18884331	rs16862080	G	C	0.0408	-1.78709	-0.334923	-2.12201
chr1	18902256	18902257	rs2816057	G	C	0.5348	4.01509	-0.938906	3.07618
chr1	18910589	18910590	rs72648767	T	C	0.496	-0.904898	-1.50118	-2.40608
chr1	18963650	18963651	rs60962459	C	G	0.1252	-1.22346	-0.526217	-1.74968
chr1	19029286	19029287	rs2743198	T	C	0.0169	1.23632	-0.966153	0.270169
chr1	19029394	19029395	rs77692122	C	G	0.0318	-0.869848	-0.984696	-1.85454
chr1	19089146	19089147	rs79705496	G	C	0.0865	-1.53643	-0.322695	-1.85912
chr1	19110492	19110493	rs12041980	A	T	0.0278	-0.868963	-0.404264	-1.27323
chr1	19112567	19112568	rs76369903	A	T	0.0815	1.59775	-2.9357	-1.33795
chr1	19112835	19112836	rs9439748	A	G	0.0805	-1.99889	0.598519	-1.40037
chr1	19112850	19112851	rs116404531	T	C	0.0805	-0.918983	-0.441713	-1.3607
chr1	19147451	19147452	rs114417072	C	A	0.0129	-0.898283	0.0121628	-0.886121
chr1	19200907	19200908	rs28529092	G	C	0.4692	1.47124	-2.9914	-1.52016
chr1	19201282	19201283	rs74056665	G	A	0.0706	1.54749	-0.74946	0.798031
chr1	19201664	19201665	rs28481840	A	G	0.4771	0.992093	-2.00554	-1.01345
chr1	19201918	19201919	rs6695033	T	C	0.0278	1.9424	-0.624678	1.31773
chr1	19202022	19202023	rs6661040	C	T	0.0268	1.08477	-2.09497	-1.0102
chr1	19202207	19202208	rs28434041	C	T	0.0268	-1.00629	-1.22823	-2.23452
chr1	19202212	19202213	rs28403282	C	T	0.0268	0.897116	-0.38667	0.510446
chr1	19210815	19210816	rs7365362	C	T	0.7843	-2.23387	0.196981	-2.03689
chr1	19221430	19221431	rs28715641	G	A	0.0189	-2.48171	-0.888001	-3.36971
chr1	19228548	19228549	rs78822272	G	T	0.2167	-1.51816	-0.843383	-2.36155
chr1	19228804	19228805	rs9426678	T	A	0.0388	2.00766	-3.0841	-1.07645
chr1	19229377	19229378	rs115934733	G	T	0.0388	-1.39931	-0.378648	-1.77796
chr1	19229610	19229611	rs138391405	C	G	0.0388	1.76746	-2.45942	-0.691963
chr1	19233926	19233927	rs144095101	A	C	0.0169	-1.97136	1.51333	-0.458027
chr1	19239514	19239515	rs4911977	T	C	0.0308	-0.952629	-0.312366	-1.26499
chr1	19240539	19240540	rs28498013	T	C	0.0298	1.57252	-3.15681	-1.58429
chr1	19240683	19240684	rs6678885	A	C	0.2296	-0.866014	-1.05335	-1.91937
chr1	19248900	19248901	rs58957999	A	G	0.2058	-1.00802	-1.01188	-2.0199
chr1	19249319	19249320	rs6426799	C	G	0.828	0.974344	-2.48642	-1.51208
chr1	19250285	19250286	rs9426699	T	G	0.2058	1.29181	-1.48405	-0.192237
chr1	19252610	19252611	rs61759282	A	G	0.508	0.850724	-2.90073	-2.05001
chr1	19253381	19253382	rs75847057	G	A	0.0467	-0.910398	-1.20021	-2.11061
chr1	19271879	19271880	rs186268478	G	A	0.0109	1.32738	-2.57032	-1.24294
chr1	19276378	19276379	rs4912113	C	T	0.831	-1.10875	0.329822	-0.778924
chr1	19277270	19277271	rs56140067	G	C	0.0437	-1.31433	-0.212475	-1.52681
chr1	19292235	19292236	rs7556101	C	G	0.1819	1.74261	-3.6782	-1.93559
chr1	19299239	19299240	rs7545729	G	C	0.5467	-1.05498	-0.617857	-1.67283
chr1	19299599	19299600	rs28667188	G	A	0.4891	1.39107	-0.809587	0.581482
chr1	19336265	19336266	rs28658160	A	G	0.4463	1.77441	-2.77807	-1.00366
chr1	19362711	19362712	rs28538817	C	T	0.0726	-1.17476	0.0656096	-1.10915
chr1	19387118	19387119	rs61763750	T	C	0.9662	-1.42684	-1.51393	-2.94077
chr1	19408293	19408294	rs67232976	G	GC	0.4026	-1.03852	-1.54551	-2.58402
chr1	19435065	19435066	rs114288128	T	C	0.0209	1.18695	-1.9262	-0.739249
chr1	19435240	19435241	rs7534950	T	A	0.0656	-1.09626	-0.96574	-2.062
chr1	19446387	19446388	rs2296104	T	C	0.6064	-1.01373	-0.636313	-1.65004
chr1	19578052	19578053	rs6680255	C	G	0.1004	-1.35533	-0.159004	-1.51433
chr1	19578191	19578192	rs2294942	G	A	0.6282	-1.32633	0.515616	-0.810715
chr1	19586780	19586781	rs55694830	C	T	0.0288	-2.49937	0.804708	-1.69466
chr1	19600106	19600107	rs75121484	G	A	0.0288	-0.953934	-0.766924	-1.72086
chr1	19600202	19600203	rs78067857	A	G	0.0288	-1.02204	-0.725666	-1.7477
chr1	19600207	19600208	rs115359581	C	G	0.0288	-1.72017	-0.593537	-2.31371
chr1	19600385	19600386	rs112053480	C	T	0.0944	0.94199	-1.86545	-0.923464
chr1	19638641	19638642	rs569962989	AGCCGGGGGCCCC	A	0.0308	-1.39031	0.0173382	-1.37297
chr1	19652062	19652063	rs11558390	G	A	0.2873	1.21538	-0.614003	0.601381
chr1	19652127	19652128	rs113123686	GT	G	0.2893	2.01518	-1.07926	0.935914
chr1	19674996	19674997	rs142704430	T	G	0.0159	0.868909	-1.42353	-0.554624
chr1	19675256	19675257	rs77620107	G	T	0.0328	-1.9931	-0.102557	-2.09565
chr1	19696833	19696834	rs185270585	C	T	0.0109	1.04029	-2.26902	-1.22873
chr1	19702006	19702007	rs7519264	A	G	0.2922	0.863854	-1.54332	-0.679468
chr1	19713875	19713876	rs12049019	T	C	0.331	-1.28165	-1.42898	-2.71064
chr1	19717960	19717961	rs140616536	CAGAGG	C	0.2425	-1.19536	-0.407099	-1.60246
chr1	19722509	19722510	rs10799808	T	C	0.3638	1.3432	-1.95193	-0.608723
chr1	19749549	19749550	rs71512947	C	G	0.3678	2.66558	-0.755297	1.91028
chr1	19749550	19749551	rs11456569	C	CT	0.3678	-0.940008	-0.921326	-1.86133
chr1	19749742	19749743	rs10917447	T	C	0.2346	0.917986	-1.23729	-0.319301
chr1	19756652	19756653	rs35542350	T	G	0.1352	-0.904035	-0.642591	-1.54663
chr1	19756824	19756825	rs75287297	G	A	0.0527	-1.6279	0.327567	-1.30033
chr1	19761553	19761554	rs72653926	G	A	0.4274	-1.12176	-0.85245	-1.97421
chr1	19763084	19763085	rs72653931	T	G	0.2286	1.1943	-2.64261	-1.44831
chr1	19766429	19766430	rs12140338	C	G	0.2654	1.46468	-1.78007	-0.315386
chr1	19766746	19766747	rs10158117	G	C	0.2654	0.964296	-1.57503	-0.610736
chr1	19789696	19789697	rs12401874	C	G	0.2992	-1.88844	-1.33938	-3.22782
chr1	19811937	19811938	rs550604780	C	T	0.0427	-1.366	-0.181398	-1.5474
chr1	19812283	19812284	rs564621875	C	G	0.0109	1.31036	-0.734805	0.575552
chr1	19821368	19821369	rs16822407	C	A	0.334	-1.16325	0.0555161	-1.10773
chr1	19832162	19832163	rs115738687	G	A	0.0149	-1.25476	-0.945857	-2.20062
chr1	19833727	19833728	rs10799820	G	C	0.1541	1.55628	-1.85996	-0.303679
chr1	19891165	19891166	rs71579803	G	GGCATTTATTAAACACCTGCATTTATTAAACA	0.5338	-1.25415	-1.05199	-2.30614
chr1	19891335	19891336	rs144875602	A	G	0.0278	1.39379	-2.37354	-0.979742
chr1	19906377	19906378	rs840262	C	T	0.0994	-1.32857	-0.268028	-1.59659
chr1	19908707	19908708	rs1737412	G	A	0.0994	1.50644	-3.72826	-2.22182
chr1	19923456	19923457	rs141101284	C	G	0.0149	0.850262	-0.855058	-0.0047955
chr1	19936089	19936090	rs1737417	T	C	0.8618	0.876342	-1.15653	-0.280186
chr1	19981790	19981791	rs2294630	A	G	0.508	-0.85056	-1.23518	-2.08574
chr1	19986340	19986341	rs12747702	A	T	0.1093	-1.55332	-1.41518	-2.9685
chr1	20003215	20003216	rs78732601	C	T	0.0328	-1.25889	-0.902745	-2.16164
chr1	20014738	20014739	rs7533981	C	T	0.6551	-1.0621	-0.882118	-1.94422
chr1	20022062	20022063	rs4244007	A	G,T	0.8539	-1.1749	-0.865701	-2.0406
chr1	20024169	20024170	rs192834732	T	C	0.0119	1.12521	-1.54793	-0.422717
chr1	20024383	20024384	rs35129869	G	T	0.1292	1.945	-3.30709	-1.36208
chr1	20041972	20041973	rs11589338	T	C	0.1004	1.3147	-2.25135	-0.936649
chr1	20078494	20078495	rs187341650	G	T	0.0109	-0.850955	0.172273	-0.678682
chr1	20078919	20078920	rs79524213	C	T	0.0159	2.19946	-2.48328	-0.28382
chr1	20091790	20091791	rs2281246	T	C	0.4036	1.02302	-2.61525	-1.59223
chr1	20092047	20092048	rs75141678	G	GTC	0.1382	1.32642	-2.19295	-0.866534
chr1	20151938	20151939	rs12126837	G	C	0.2406	1.12989	-1.162	-0.0321059
chr1	20171859	20171860	rs6426833	G	A	0.5487	1.95225	-0.713355	1.23889
chr1	20186580	20186581	rs12121573	T	G	0.3449	1.74031	-1.99628	-0.255976
chr1	20208782	20208783	rs72658579	T	C	0.2575	1.01955	-2.78923	-1.76968
chr1	20208824	20208825	rs878235	C	G	0.1193	1.09027	-1.70955	-0.619288
chr1	20238575	20238576	rs145839450	A	AT	0.0557	-0.991913	-0.476313	-1.46823
chr1	20290415	20290416	rs12042771	G	A	0.2445	-1.36742	-0.431812	-1.79923
chr1	20296998	20296999	rs1891319	T	A	0.2803	-2.45756	0.938847	-1.51871
chr1	20335137	20335138	rs71647137	T	C	0.0547	1.31302	-1.49569	-0.18267
chr1	20396298	20396299	rs11573190	G	A	0.0716	-1.03038	-0.52793	-1.55831
chr1	20396414	20396415	rs11573191	G	A	0.165	-2.35808	-0.0627421	-2.42082
chr1	20427720	20427721	rs112379629	C	T	0.0219	-1.59513	-1.67028	-3.26542
chr1	20437255	20437256	rs62541951	C	G	0.0258	-2.01233	-1.23365	-3.24598
chr1	20437562	20437563	rs7518058	T	C	0.5596	1.11944	-2.0839	-0.964461
chr1	20437627	20437628	rs62541948	A	C,G	0.0388	-1.41169	-0.858375	-2.27006
chr1	20454420	20454421	rs12755057	G	C	0.172	1.03765	-3.1928	-2.15515
chr1	20454582	20454583	rs142394211	A	T	0.0368	-0.91241	-0.702726	-1.61514
chr1	20491131	20491132	rs12139181	G	C	0.1839	-2.52527	0.582604	-1.94266
chr1	20538162	20538163	rs4654840	C	T	0.7813	-1.09553	-1.51073	-2.60626
chr1	20539522	20539523	rs35862517	C	A	0.7833	-2.27018	2.69733	0.427147
chr1	20582187	20582188	rs74785116	C	A	0.0567	-1.19151	-1.44905	-2.64056
chr1	20582417	20582418	rs11578017	G	A	0.2634	-0.973428	-0.692252	-1.66568
chr1	20609113	20609114	rs2205721	C	T	0.6312	1.24494	-1.82104	-0.576102
chr1	20609532	20609533	rs4654846	G	A	0.2217	-0.912266	-1.1088	-2.02106
chr1	20635027	20635028	rs12093685	G	A	0.1958	1.05871	-1.52961	-0.470902
chr1	20635129	20635130	rs10753496	T	C	0.4245	1.09528	-1.41698	-0.321703
chr1	20635319	20635320	rs4654850	G	A	0.6451	0.87024	-2.83177	-1.96153
chr1	20650451	20650452	rs10753497	T	C	0.4354	1.11763	-2.58304	-1.46541
chr1	20650549	20650550	rs17353088	C	T	0.1431	0.961178	-1.92275	-0.96157
chr1	20743410	20743411	rs79837883	A	T	0.1054	-0.940868	-0.326998	-1.26787
chr1	20756893	20756894	rs912811	G	C	0.6312	1.32816	-3.29308	-1.96492
chr1	20767693	20767694	rs74379051	C	T	0.0239	-1.54628	-1.76571	-3.31199
chr1	20797207	20797208	rs429707	C	A	0.4483	-1.12823	-1.01133	-2.13956
chr1	20804621	20804622	rs79232860	A	C	0.0249	1.67818	-1.85402	-0.175843
chr1	20809313	20809314	rs11539080	T	G	0.0308	-2.24493	-0.271008	-2.51594
chr1	20813487	20813488	rs1253918	G	T	0.7644	-0.885224	-1.12566	-2.01089
chr1	20838102	20838103	rs139670343	C	T	0.0139	-1.95464	-0.613793	-2.56844
chr1	20878691	20878692	rs6675648	A	G	0.1879	-0.883144	-1.76304	-2.64618
chr1	20884662	20884663	rs72649153	C	T	0.0487	-1.19079	-0.908662	-2.09945
chr1	20884828	20884829	rs114152325	A	G	0.0129	1.06235	-1.8774	-0.815056
chr1	20901921	20901922	rs2101731	G	A	0.2694	-1.64714	1.05439	-0.592756
chr1	20902052	20902053	rs569660	G	A	0.1441	1.47074	-3.38954	-1.9188
chr1	20902333	20902334	rs116176928	C	G	0.0537	0.849794	-2.87586	-2.02606
chr1	20913999	20914000	rs34185271	AG	A	0.0716	-0.960969	-0.38149	-1.34246
chr1	20915534	20915535	rs602946	G	A	0.0149	-0.94219	0.152354	-0.789836
chr1	20916079	20916080	rs589942	C	G	0.3062	-1.08582	-0.398264	-1.48409
chr1	20917107	20917108	rs472629	G	A	0.3012	-0.955798	-0.900802	-1.8566
chr1	20926564	20926565	rs111908452	A	G	0.0318	1.89931	-2.24545	-0.346144
chr1	20942955	20942956	rs500534	T	A	0.7783	1.10107	-1.57127	-0.470197
chr1	20966879	20966880	rs3121394	C	T	0.8976	-1.07432	-0.343816	-1.41814
chr1	20980846	20980847	rs41307775	C	T	0.0119	0.908184	-1.69544	-0.78726
chr1	20980921	20980922	rs2070658	G	A	0.1014	-1.00846	0.0631203	-0.945345
chr1	20988756	20988757	rs3753833	G	A	0.2217	-0.90273	-1.97032	-2.87305
chr1	20992605	20992606	rs630484	G	T	0.4095	-0.99627	-1.00149	-1.99776
chr1	21011896	21011897	rs72980803	C	T	0.0258	-1.27388	-0.690523	-1.96441
chr1	21023009	21023010	rs12739943	C	T	0.0964	1.51665	-2.85871	-1.34206
chr1	21023695	21023696	rs12407382	G	A	0.0467	-1.04247	-1.44993	-2.4924
chr1	21033927	21033928	rs61778503	G	A	0.0686	-1.03663	-0.843667	-1.88029
chr1	21044218	21044219	rs601392	A	C	0.839	-1.31034	-1.83778	-3.14812
chr1	21044631	21044632	rs78001072	C	CGG	0.7167	0.917276	-1.76604	-0.848762
chr1	21052061	21052062	rs79994706	C	T	0.0139	-2.05516	-1.36112	-3.41628
chr1	21059705	21059706	rs78491441	C	G	0.0328	-1.26469	-0.67749	-1.94218
chr1	21120026	21120027	rs13376428	T	C	0.4622	0.91136	-2.14917	-1.23781
chr1	21339643	21339644	rs6681064	A	G	0.4284	-0.892597	-0.408789	-1.30139
chr1	21375095	21375096	rs34513568	G	A	0.0358	-0.873591	-0.136519	-1.01011
chr1	21497789	21497790	rs12136153	A	C	0.4264	-1.04745	-1.04697	-2.09443
chr1	21543458	21543459	rs3026918	C	T	0.1113	-1.08094	0.107941	-0.973003
chr1	21544667	21544668	rs28368056	C	G	0.0408	0.867957	-1.70332	-0.835361
chr1	21547705	21547706	rs7551615	G	A	0.1571	-1.03574	-1.07106	-2.1068
chr1	21581020	21581021	rs3026886	C	T	0.2376	-0.961795	-0.968761	-1.93056
chr1	21581764	21581765	rs2282715	C	T	0.1581	-1.11734	-0.962987	-2.08033
chr1	21581978	21581979	rs3026883	C	A	0.3161	1.81977	-2.04544	-0.225671
chr1	21588250	21588251	rs3026875	C	A	0.0268	-1.23839	-0.265805	-1.5042
chr1	21588277	21588278	rs212531	G	A	0.1233	1.92184	-3.57908	-1.65724
chr1	21588602	21588603	rs212532	C	G	0.6103	2.03239	-0.73021	1.30218
chr1	21588699	21588700	rs114434480	G	A	0.0159	1.22787	-2.15538	-0.927508
chr1	21595133	21595134	rs28367967	C	T	0.0964	-1.61045	0.290882	-1.31957
chr1	21617244	21617245	rs213045	G	T	0.2873	1.84315	-2.22133	-0.378181
chr1	21626341	21626342	rs213055	G	A	0.0845	1.70608	-1.78421	-0.0781292
chr1	21630279	21630280	rs12723450	T	C	0.0905	-1.00576	-0.475794	-1.48156
chr1	21630290	21630291	rs12737859	C	T	0.0875	-0.931623	-1.37308	-2.3047
chr1	21634976	21634977	rs76450551	G	A	0.1968	-1.70339	-0.0289467	-1.73234
chr1	21635528	21635529	rs3026840	C	A	0.0467	-1.2155	-0.36171	-1.57721
chr1	21644118	21644119	rs115430579	G	A	0.0149	1.51658	-2.75674	-1.24016
chr1	21651178	21651179	rs3026827	G	A	0.0984	-0.921261	-1.11514	-2.0364
chr1	21653660	21653661	rs213029	C	T	0.0855	1.155	-0.824937	0.330068
chr1	21660761	21660762	rs3026820	T	A	0.4831	-0.983353	-0.864997	-1.84835
chr1	21671942	21671943	rs2072654	T	G	0.5616	1.37886	-1.19685	0.182007
chr1	21708195	21708196	rs79183860	G	A	0.0119	-0.974588	-1.20295	-2.17753
chr1	21754487	21754488	rs72476502	G	A,C	0.1372	-0.94027	-0.796026	-1.7363
chr1	21766604	21766605	rs66732917	TGCAGGC	T	0.5417	-1.58774	-0.406792	-1.99453
chr1	21767095	21767096	rs4654745	G	T	0.5388	0.972904	-1.25355	-0.280644
chr1	21789455	21789456	rs141274736	A	G	0.0139	1.0567	-2.24591	-1.1892
chr1	21793238	21793239	rs4654942	A	T	0.6034	-1.29516	-0.0189	-1.31406
chr1	21794280	21794281	rs7531244	A	G	0.0388	1.22135	-2.06492	-0.843564
chr1	21794580	21794581	rs7533990	T	C	0.0388	-1.41782	-1.53169	-2.94951
chr1	21794641	21794642	rs41265985	G	A	0.163	-1.13496	-0.867747	-2.0027
chr1	21795287	21795288	rs61740199	C	T	0.0368	-1.43607	-0.241046	-1.67712
chr1	21815659	21815660	rs904927	C	T	0.2008	-1.31127	-0.909747	-2.22102
chr1	21836339	21836340	rs10917002	C	T	0.0994	1.49525	-2.39643	-0.901178
chr1	21857129	21857130	rs77936121	G	A	0.0298	0.907454	-2.05758	-1.15013
chr1	21862999	21863000	rs1256345	A	C	0.1581	1.34086	-1.54387	-0.20301
chr1	21866563	21866564	rs7547128	G	A	0.4543	1.10237	-1.77067	-0.668301
chr1	21873001	21873002	rs12141569	C	T	0.498	-1.43706	0.0455578	-1.39151
chr1	21875702	21875703	rs34771761	AC	A	0.1143	1.04734	-2.28211	-1.23477
chr1	21894038	21894039	rs141447623	G	A	0.0348	-0.956872	-1.22002	-2.17689
chr1	21899051	21899052	rs10917017	C	T	0.1252	-1.15925	-0.967351	-2.1266
chr1	21900443	21900444	rs2275369	A	G	0.1262	1.73495	-0.63287	1.10208
chr1	21900458	21900459	rs35488260	A	C	0.2952	0.917288	-0.579961	0.337328
chr1	21901456	21901457	rs1697404	A	G	0.8946	-0.976296	-0.10884	-1.08514
chr1	21901557	21901558	rs3767142	G	A	0.2575	1.02483	-1.43707	-0.412241
chr1	21911864	21911865	rs55881067	G	A	0.4851	1.02577	-2.98726	-1.96149
chr1	21921989	21921990	rs829393	C	G	0.7883	-1.04377	-1.6735	-2.71727
chr1	21925656	21925657	rs1681257	C	T	0.8907	-1.09478	-0.74623	-1.84101
chr1	21934325	21934326	rs115051087	A	C	0.0497	0.851084	-1.03531	-0.184227
chr1	21934666	21934667	rs829371	G	A	0.502	-0.873686	-0.339874	-1.21356
chr1	21934692	21934693	rs72660316	T	C	0.1441	1.18156	-2.86465	-1.68309
chr1	21945388	21945389	rs12143471	C	T	0.1322	-1.51622	-1.94892	-3.46514
chr1	21945613	21945614	rs115394639	C	T	0.0626	-1.07007	-0.527301	-1.59737
chr1	21978464	21978465	rs181939530	G	A	0.1312	1.29453	-1.71916	-0.42463
chr1	21978647	21978648	rs75141928	A	G	0.3579	-1.09968	-1.42435	-2.52403
chr1	21983253	21983254	rs829405	C	T	0.501	1.10715	-2.72419	-1.61705
chr1	21992599	21992600	rs710948	A	G	0.9573	0.884324	-2.08941	-1.20508
chr1	21996030	21996031	rs72660360	G	A	0.0149	1.26903	-2.92976	-1.66072
chr1	22007442	22007443	rs72660363	C	T	0.1292	1.41215	-2.63134	-1.21919
chr1	22090255	22090256	rs7548795	C	T	0.7465	0.896135	-1.53329	-0.637159
chr1	22095139	22095140	rs202119403	CTTCAAGCCCCACCCCT	C	0.0179	-1.91077	-0.419007	-2.32977
chr1	22109795	22109796	rs35745827	C	T	0.1054	-1.85804	-1.0605	-2.91854
chr1	22141205	22141206	rs10917051	A	C	0.6988	-1.03516	-1.56461	-2.59978
chr1	22145212	22145213	rs67187520	C	A	0.0169	1.36838	-2.33114	-0.962758
chr1	22157461	22157462	rs560834288	T	G	0.0676	1.43042	-1.59257	-0.162157
chr1	22169682	22169683	rs74060196	G	A	0.0189	-1.40784	0.0371553	-1.37069
chr1	22190540	22190541	rs141748265	C	G	0.0139	0.872678	-3.00278	-2.1301
chr1	22196253	22196254	rs36086776	C	T	0.0427	-1.45331	-1.27749	-2.73079
chr1	22231827	22231828	rs34122101	A	AT	0.2793	1.29887	0.535594	1.83447
chr1	22241690	22241691	rs113482179	G	GTGCCCAC	0.9781	-1.54175	0.162112	-1.37964
chr1	22247497	22247498	rs12131384	C	T	0.6302	-0.99539	-1.50239	-2.49778
chr1	22253253	22253254	rs558320141	CAAAAAAAAAAAAAAA	C	0.0915	-1.08448	-0.979135	-2.06362
chr1	22254087	22254088	rs112663661	C	T	0.0129	1.63404	-2.61621	-0.98217
chr1	22263987	22263988	rs201561673	CT	C	0.6292	0.851042	-1.32794	-0.476893
chr1	22273291	22273292	rs11576772	C	T	0.1213	-1.94448	-0.791428	-2.7359
chr1	22281663	22281664	rs10917072	G	A	0.8748	-0.86854	-1.04603	-1.91457
chr1	22281812	22281813	rs12748739	C	G	0.2167	-1.65861	-0.828207	-2.48682
chr1	22283734	22283735	rs10917076	C	T	0.6312	1.08076	-2.42324	-1.34248
chr1	22290428	22290429	rs72662484	C	T	0.2107	-1.0457	-1.15486	-2.20056
chr1	22290622	22290623	rs35806133	C	T	0.2107	2.33305	-1.50257	0.830483
chr1	22290629	22290630	rs34277514	G	A	0.3131	-1.42292	-1.05829	-2.48121
chr1	22301179	22301180	rs35522699	G	A	0.2286	-1.00551	-0.546948	-1.55246
chr1	22307003	22307004	rs58598600	G	A	0.0109	-1.00558	-1.40932	-2.41491
chr1	22307188	22307189	rs60580853	T	A	0.0905	1.30466	-1.72035	-0.415689
chr1	22307215	22307216	rs113430470	G	C	0.0199	-2.64713	2.72835	0.0812287
chr1	22307339	22307340	rs7528228	C	T	0.9722	-1.31909	0.0145437	-1.30454
chr1	22307357	22307358	rs7528300	C	G	0.9722	1.21167	-3.35612	-2.14445
chr1	22307708	22307709	rs201648589	A	G	0.0288	0.943889	-2.15531	-1.21143
chr1	22308177	22308178	rs7553024	G	A	0.9722	1.18437	-1.82336	-0.638996
chr1	22325280	22325281	rs12139337	C	T	0.2525	-0.941027	-0.883695	-1.82472
chr1	22331626	22331627	rs4539104	G	A	0.6928	-1.00558	-1.40932	-2.41491
chr1	22351325	22351326	rs3754505	G	C	0.2773	-1.21505	-0.546791	-1.76184
chr1	22352039	22352040	rs2255282	G	T	0.508	2.4002	-3.25954	-0.859341
chr1	22366674	22366675	rs74821829	T	A	0.0388	-1.15375	-1.33814	-2.49189
chr1	22372788	22372789	rs143252229	G	A	0.0109	1.18735	-1.88685	-0.699506
chr1	22379087	22379088	rs2473325	G	A	0.669	-1.44884	-0.394506	-1.84334
chr1	22380236	22380237	rs1980475	T	C	0.9364	-0.919685	-1.18076	-2.10045
chr1	22432281	22432282	rs4655021	G	A	0.9235	0.98127	-2.50733	-1.52606
chr1	22432418	22432419	rs4655022	T	C	0.7515	-1.55776	-1.28017	-2.83794
chr1	22449061	22449062	rs141779913	G	A	0.0109	0.918035	-1.34429	-0.426259
chr1	22449951	22449952	rs10799736	T	C	0.9245	1.45313	-1.43757	0.0155648
chr1	22469068	22469069	rs60039305	A	C	0.0447	0.990291	-1.50598	-0.515687
chr1	22470114	22470115	rs12135916	G	A	0.7286	-1.0304	-1.87491	-2.90532
chr1	22490170	22490171	rs2807360	G	C	0.3757	1.63398	-1.69368	-0.0597054
chr1	22505608	22505609	rs6695779	A	G	0.2644	0.95497	-1.24176	-0.286795
chr1	22505741	22505742	rs2982284	G	C	0.7674	-1.62314	-0.973867	-2.59701
chr1	22556223	22556224	rs12751606	T	C	0.0358	-1.47488	-0.698606	-2.17348
chr1	22556239	22556240	rs372952132	T	AC	0.5527	0.938849	-1.70237	-0.763519
chr1	22556705	22556706	rs6670439	C	T	0.2416	0.880428	-3.04543	-2.165
chr1	22556743	22556744	rs10917181	A	T	0.2435	-1.2891	0.423268	-0.865834
chr1	22619877	22619878	rs12059598	C	T	0.341	-1.55074	-0.0711667	-1.62191
chr1	22690764	22690765	rs4233287	T	C	0.6054	1.36866	-2.1943	-0.825646
chr1	22699228	22699229	rs147788101	C	T	0.0368	0.957796	-2.5771	-1.6193
chr1	22706875	22706876	rs75328446	G	A	0.0507	0.901558	-2.13814	-1.23659
chr1	22706968	22706969	rs6669194	C	T	0.4135	-0.85155	-0.110221	-0.96177
chr1	22741117	22741118	rs7513392	G	A	0.1233	1.56635	-2.77805	-1.2117
chr1	22746903	22746904	rs10917228	G	A	0.4274	-1.29016	-1.28791	-2.57807
chr1	22774265	22774266	rs1890775	C	T	0.2356	1.03185	-1.32915	-0.297303
chr1	22778911	22778912	rs10917233	C	T	0.2336	-1.21528	-0.529653	-1.74493
chr1	22797834	22797835	rs10753538	G	A	0.2336	0.912359	-1.43797	-0.525611
chr1	22821843	22821844	rs78296352	G	T	0.0288	0.969144	-1.86596	-0.896812
chr1	22863295	22863296	rs12130348	T	C	0.6968	-0.96029	-0.273091	-1.23338
chr1	22863327	22863328	rs74060274	C	T	0.0586	-0.873782	-2.22308	-3.09686
chr1	22891964	22891965	rs209735	C	T	0.9632	-1.44143	-2.0342	-3.47563
chr1	22906780	22906781	rs113358893	G	A	0.0835	-1.81862	-2.79228	-4.6109
chr1	22962652	22962653	rs2986658	C	T	0.3966	-1.21761	-0.923019	-2.14063
chr1	22963049	22963050	rs12058824	G	A	0.0924	-1.0532	-0.0523719	-1.10557
chr1	23016005	23016006	rs294223	T	C	0.7286	0.867714	-1.23422	-0.366507
chr1	23016496	23016497	rs294224	A	G	0.7237	-1.04806	-1.55798	-2.60604
chr1	23029607	23029608	rs35520349	A	G	0.2465	1.14771	-1.69441	-0.5467
chr1	23121396	23121397	rs35360906	T	G	0.0348	-0.948988	-0.186457	-1.13545
chr1	23123375	23123376	rs1866791	T	C	0.832	-1.07617	-0.813324	-1.88949
chr1	23126621	23126622	rs4655095	G	A	0.83	-0.859014	-1.12585	-1.98487
chr1	23126669	23126670	rs41266947	C	T	0.1103	-1.05492	-0.5023	-1.55722
chr1	23141466	23141467	rs4654817	C	T	0.169	-0.880044	0.18256	-0.697484
chr1	23141652	23141653	rs4655120	A	G	0.166	0.985996	-2.67062	-1.68463
chr1	23141695	23141696	rs55880172	T	G	0.83	-1.39082	-1.38028	-2.7711
chr1	23141959	23141960	rs61768194	C	T	0.7097	1.87127	-1.68853	0.182741
chr1	23142279	23142280	rs6682233	C	T	0.7107	-1.0742	-0.662671	-1.73687
chr1	23142350	23142351	rs2165332	C	T	0.827	-1.01519	-0.678815	-1.69401
chr1	23168058	23168059	rs10917318	C	T	0.1819	-1.13365	-0.946664	-2.08031
chr1	23168316	23168317	rs28649787	C	G	0.5616	-0.998503	-0.822159	-1.82066
chr1	23183005	23183006	rs114809809	C	T	0.0219	1.42455	-1.24127	0.18328
chr1	23201971	23201972	rs187126482	C	T	0.0119	1.05553	-0.520493	0.535033
chr1	23257058	23257059	rs12034166	T	C	0.4483	0.944588	-1.74569	-0.801104
chr1	23268063	23268064	rs2176271	A	T	0.3668	-1.46687	0.0855561	-1.38131
chr1	23279650	23279651	rs12735075	A	T	0.0258	-1.00789	-0.590691	-1.59858
chr1	23346648	23346649	rs148150162	G	A	0.0119	0.914361	-1.82363	-0.909267
chr1	23419373	23419374	rs3765407	G	T	0.828	-1.53772	0.0925316	-1.44519
chr1	23425138	23425139	rs11578046	G	A	0.335	-0.960703	-0.282613	-1.24332
chr1	23494288	23494289	rs61781469	A	T	0.1093	1.86741	-1.20304	0.66437
chr1	23495068	23495069	rs190087516	T	C	0.0159	1.27905	-1.92751	-0.64846
chr1	23504087	23504088	rs146877351	C	T	0.0417	-1.41699	-0.554232	-1.97122
chr1	23543928	23543929	rs7414010	T	C	0.2495	-0.903678	0.152575	-0.751103
chr1	23544747	23544748	rs7339958	A	G	0.1561	-1.06207	0.254238	-0.80783
chr1	23649676	23649677	rs202188413	A	AGCCC	0.0139	0.901274	-1.49423	-0.592952
chr1	23693166	23693167	rs10917374	G	C	0.0656	0.849679	-2.19148	-1.34181
chr1	23695274	23695275	rs680386	G	T	0.1889	1.50449	-2.12399	-0.619497
chr1	23720821	23720822	rs61777153	G	A	0.172	2.69679	-0.779894	1.9169
chr1	23721595	23721596	rs12130159	G	A	0.0298	1.3583	-1.74828	-0.38998
chr1	23723523	23723524	rs12139783	C	T	0.0189	-1.12616	0.443306	-0.682858
chr1	23729338	23729339	rs1618841	A	G	0.0328	0.8689	-2.71681	-1.84791
chr1	23748851	23748852	rs11589432	G	C	0.4672	-0.866642	-1.72101	-2.58766
chr1	23749147	23749148	rs1001207	G	A	0.8161	-0.917009	-0.334886	-1.25189
chr1	23795719	23795720	rs61778887	G	A	0.1451	-1.27251	-1.74149	-3.014
chr1	23810062	23810063	rs909537	C	G	0.9016	1.3094	0.213728	1.52313
chr1	23818641	23818642	rs12119419	C	G	0.0437	-3.51297	1.75074	-1.76224
chr1	23833931	23833932	rs111903743	T	A	0.0567	0.94714	-2.47885	-1.53171
chr1	23834437	23834438	rs41300116	T	C	0.0696	1.03011	-0.981869	0.048243
chr1	23836363	23836364	rs2075993	A	G	0.5219	1.30044	-1.7751	-0.474658
chr1	23858001	23858002	rs2742976	T	G	0.6461	-1.09622	-1.00582	-2.10204
chr1	23866600	23866601	rs11576825	C	G	0.0626	1.24799	-1.34924	-0.101248
chr1	23871128	23871129	rs12726484	G	C	0.1759	-0.975691	-0.679929	-1.65562
chr1	23884990	23884991	rs113887634	G	A	0.0547	-0.868003	-0.897839	-1.76584
chr1	23886072	23886073	rs2742946	T	C	0.4801	2.61464	-0.459865	2.15477
chr1	23894437	23894438	rs114235021	G	A	0.0169	-0.872349	-0.620722	-1.49307
chr1	23902320	23902321	rs184478158	G	A	0.0119	-1.02852	-1.30222	-2.33074
chr1	23902415	23902416	rs2811946	A	C	0.5517	-2.22409	-0.814226	-3.03831
chr1	23912518	23912519	rs72870520	C	T	0.0239	1.05655	-1.90312	-0.846566
chr1	23946442	23946443	rs72663260	C	A	0.1461	-1.00097	-0.150627	-1.1516
chr1	23965311	23965312	rs146687637	T	C	0.0109	2.01229	-0.30915	1.70314
chr1	23965516	23965517	rs61777309	G	A	0.2515	-1.87505	-0.780947	-2.656
chr1	24018223	24018224	rs3753270	C	T	0.1779	1.27458	-2.5442	-1.26962
chr1	24045819	24045820	rs519202	C	T	0.6262	1.46767	-2.06638	-0.598703
chr1	24071295	24071296	rs140880078	A	G	0.0159	-2.10228	0.584842	-1.51744
chr1	24085912	24085913	rs571938377	A	AT	0.0129	-1.63672	1.56789	-0.068831
chr1	24095575	24095576	rs140569782	T	C	0.0199	0.929214	-2.28992	-1.36071
chr1	24117834	24117835	rs2502985	G	A	0.9225	-1.24757	-1.10373	-2.3513
chr1	24132784	24132785	rs974698	C	T	0.5905	-1.89652	0.393394	-1.50312
chr1	24165247	24165248	rs58035855	G	C	0.4125	-1.06035	-0.478056	-1.53841
chr1	24175762	24175763	rs12404321	A	G	0.0885	-2.98531	1.96164	-1.02367
chr1	24192199	24192200	rs34902309	A	G	0.4225	-0.937073	-0.753767	-1.69084
chr1	24192378	24192379	rs74937660	G	C	0.0885	0.975893	-1.63566	-0.659769
chr1	24194747	24194748	rs2070956	G	C	0.0905	1.00504	-0.682492	0.322547
chr1	24195130	24195131	rs3003320	C	G	0.0905	-0.905979	-0.753947	-1.65993
chr1	24195248	24195249	rs3003622	A	G	0.0905	-0.882698	-1.48081	-2.3635
chr1	24195269	24195270	rs3003321	G	A	0.0905	-0.86101	-0.898468	-1.75948
chr1	24200902	24200903	rs2229586	G	C	0.5865	0.96482	-2.62072	-1.6559
chr1	24200982	24200983	rs2229583	C	T	0.5885	-0.96816	-1.21775	-2.18591
chr1	24219233	24219234	rs6424127	T	C	0.829	0.874131	-1.74801	-0.873877
chr1	24219373	24219374	rs6424130	T	C	0.829	0.95688	-2.64227	-1.68539
chr1	24229412	24229413	rs61778217	G	A	0.1233	-0.986173	0.325445	-0.660728
chr1	24256825	24256826	rs558442281	C	A	0.0229	1.20567	-2.61968	-1.41401
chr1	24256864	24256865	rs554436069	A	C	0.0547	-1.29322	-2.02704	-3.32026
chr1	24306620	24306621	rs7523052	G	T	0.0596	0.965632	-2.32153	-1.3559
chr1	24372970	24372971	rs12401982	C	T	0.0477	-0.852636	-0.26542	-1.11806
chr1	24373779	24373780	rs72648511	C	T	0.0358	-1.98593	0.226226	-1.75971
chr1	24379403	24379404	rs4649160	C	T	0.7296	-1.328	-0.703843	-2.03184
chr1	24379649	24379650	rs10633618	C	CTATT	0.7296	-1.13327	-0.539396	-1.67267
chr1	24388678	24388679	rs3795303	T	C	0.2038	0.973766	-1.5519	-0.578136
chr1	24407133	24407134	rs4649178	C	T	0.4423	-1.08399	0.0143807	-1.0696
chr1	24476369	24476370	rs4330872	C	T	0.8688	-1.00946	-1.41958	-2.42904
chr1	24476885	24476886	rs11579657	A	G	0.1998	1.28204	-1.11726	0.164778
chr1	24483516	24483517	rs11249009	G	T	0.0189	1.00861	-0.792238	0.216375
chr1	24533063	24533064	rs1416833	T	C	0.5825	2.35061	-1.35909	0.991524
chr1	24533121	24533122	rs149890860	T	C	0.0119	-0.99916	-1.40917	-2.40833
chr1	24533293	24533294	rs946663	A	C	0.5815	1.47961	-2.60764	-1.12804
chr1	24533486	24533487	rs946664	G	A	0.5696	-1.2075	-0.36587	-1.57337
chr1	24562693	24562694	rs61772956	G	A	0.2157	1.91307	-3.98107	-2.068
chr1	24610583	24610584	rs12121909	G	A	0.5129	-0.940225	-0.119713	-1.05994
chr1	24627399	24627400	rs11249078	G	A	0.5328	-1.227	-0.672417	-1.89941
chr1	24627428	24627429	rs11249079	G	A	0.5328	-0.960388	-0.819884	-1.78027
chr1	24628235	24628236	rs116429113	G	T	0.0189	1.12761	-2.21878	-1.09117
chr1	24648425	24648426	rs149025716	C	A	0.0119	2.68812	-0.64873	2.03939
chr1	24695748	24695749	rs35671964	C	G	0.3549	-2.71309	0.773264	-1.93983
chr1	24712991	24712992	rs510614	C	G	0.6272	-1.84318	0.839653	-1.00353
chr1	24713471	24713472	rs12089169	G	A	0.1103	-0.947159	-0.184425	-1.13158
chr1	24754405	24754406	rs2235553	T	A	0.2793	1.58942	-1.72939	-0.139962
chr1	24754519	24754520	rs2223503	A	G	0.3509	1.30675	-1.7469	-0.440152
chr1	24764718	24764719	rs115436774	G	A	0.0159	-1.93394	0.0135869	-1.92036
chr1	24764743	24764744	rs138075061	G	A	0.0199	-2.07425	-0.412748	-2.487
chr1	24764753	24764754	rs7542174	G	A	0.2853	-1.74697	0.967429	-0.779543
chr1	24806145	24806146	rs195736	C	T	0.2187	-1.19417	-0.424699	-1.61887
chr1	24853662	24853663	rs371968521	A	ATGGTGTGT	0.2555	1.77193	-3.03344	-1.26151
chr1	24873674	24873675	rs76321800	G	T	0.0308	-0.873355	-1.02136	-1.89471
chr1	24882345	24882346	rs6664240	G	T	0.3131	-1.37119	-0.670738	-2.04193
chr1	24882804	24882805	rs6702180	A	G	0.2038	0.910688	-2.29389	-1.38321
chr1	24882926	24882927	rs72652598	C	T	0.0994	-0.9377	-1.91524	-2.85294
chr1	24902250	24902251	rs7549084	G	A	0.6899	-0.85556	-1.96302	-2.81858
chr1	24902405	24902406	rs549577743	CAAAAAAAAAA	C	0.1004	-0.972912	-1.05862	-2.03153
chr1	24903004	24903005	rs56030698	A	G	0.0895	-1.49122	-1.27467	-2.76589
chr1	24903045	24903046	rs7541957	A	G	0.0775	-1.315	-1.15936	-2.47436
chr1	24914031	24914032	rs4648999	A	T	0.5517	-1.70634	-1.12472	-2.83106
chr1	24926265	24926266	rs61624893	C	A	0.3171	-1.09009	-1.57017	-2.66026
chr1	25015113	25015114	rs16829923	G	A	0.0338	1.52695	-2.56859	-1.04164
chr1	25029117	25029118	rs7543969	T	C	0.6421	-1.92228	-1.18197	-3.10426
chr1	25032604	25032605	rs4649015	C	T	0.6431	-1.3621	0.639147	-0.72295
chr1	25046686	25046687	rs76072819	G	C	0.0457	1.42466	-2.10347	-0.678809
chr1	25071667	25071668	rs12063304	A	G	0.0368	3.03082	-1.64764	1.38318
chr1	25073019	25073020	rs4649017	T	C	0.3678	-1.79478	-0.461592	-2.25638
chr1	25080521	25080522	rs7525139	C	T	0.2952	-1.33822	-0.890952	-2.22917
chr1	25155184	25155185	rs4606258	T	C	0.3022	1.37518	-0.697088	0.678094
chr1	25155187	25155188	rs4351587	G	C	0.2992	-1.52505	-0.217999	-1.74304
chr1	25174415	25174416	rs112441123	G	T	0.0417	0.895993	-1.79728	-0.901287
chr1	25175245	25175246	rs4648879	A	G	0.7018	1.7011	-2.96563	-1.26453
chr1	25189376	25189377	rs4072968	T	C	0.34	-1.02754	-0.100657	-1.1282
chr1	25213236	25213237	rs4649035	C	T	0.9742	-1.35097	-0.0136409	-1.36461
chr1	25213378	25213379	rs12027805	G	T	0.1978	2.19778	-3.22204	-1.02426
chr1	25216151	25216152	rs11249196	T	A	0.2286	1.02561	-1.2468	-0.221196
chr1	25241089	25241090	rs2282719	A	C	0.5567	1.11298	-1.7519	-0.638917
chr1	25292667	25292668	rs7528484	C	T	0.5437	-1.45482	0.468703	-0.986121
chr1	25293215	25293216	rs7414934	A	C	0.5437	-0.902619	-0.835867	-1.73849
chr1	25329990	25329991	rs387175	T	C	0.8131	1.12969	-2.25524	-1.12555
chr1	25330458	25330459	rs12144291	G	A	0.0507	-3.02	2.32208	-0.697922
chr1	25348949	25348950	rs71014329	G	GT	0.6054	-1.76634	-0.261384	-2.02773
chr1	25355367	25355368	rs78712131	C	T	0.0507	-1.17807	-1.25303	-2.4311
chr1	25392363	25392364	rs311452	G	A	0.2903	-1.26397	-0.874908	-2.13888
chr1	25395427	25395428	rs35335311	TG	T	0.163	1.43153	-1.54103	-0.109508
chr1	25395758	25395759	rs380149	G	A	0.6153	1.06215	-0.451875	0.610277
chr1	25421616	25421617	rs6657249	A	C,T	0.506	1.10868	-1.06123	0.0474469
chr1	25453164	25453165	rs74739434	T	G	0.0179	0.873281	-0.847476	0.0258053
chr1	25473289	25473290	rs2143163	T	C	0.7416	1.43404	-1.8666	-0.432558
chr1	25509520	25509521	rs5773123	CG	C	0.2714	-1.34564	0.67563	-0.670012
chr1	25566816	25566817	rs149332972	G	C	0.0219	-1.17096	-0.618638	-1.7896
chr1	25627065	25627066	rs2986167	C	G	0.2286	1.6695	-1.56682	0.102684
chr1	25724145	25724146	rs631133	T	C	0.5537	-1.01643	0.771909	-0.24452
chr1	25732191	25732192	rs370418964	A	G	0.0984	1.72433	-2.30112	-0.576798
chr1	25732547	25732548	rs28513325	G	A	0.9722	1.17139	-2.0457	-0.874302
chr1	25756795	25756796	rs145575386	G	T	0.0159	-1.1732	-0.0436208	-1.21682
chr1	25870017	25870018	rs61776820	C	G	0.9831	2.083	-0.4715	1.6115
chr1	25875919	25875920	rs72873721	C	G	0.0547	-1.78513	-1.51725	-3.30238
chr1	25883612	25883613	rs146180707	G	C	0.0119	-1.31423	-0.169244	-1.48347
chr1	25885527	25885528	rs61776821	G	A	0.504	-1.31209	-1.04174	-2.35383
chr1	25967586	25967587	rs2143102	T	C	0.9533	1.19583	-1.09723	0.0986068
chr1	26011123	26011124	rs1267218	G	A	0.0905	-0.850024	-1.15497	-2.005
chr1	26015804	26015805	rs2786866	G	A	0.0905	-1.14013	0.0806226	-1.05951
chr1	26021815	26021816	rs60689355	G	T	0.0497	-0.855256	-0.588836	-1.44409
chr1	26027366	26027367	rs146713535	G	A	0.0129	-2.28599	0.44055	-1.84544
chr1	26053996	26053997	rs1267223	C	G	0.0606	1.50656	-2.08342	-0.576856
chr1	26063042	26063043	rs2744773	G	A	0.0527	1.89311	-3.03586	-1.14275
chr1	26098106	26098107	rs2072747	G	A	0.6571	1.35902	-1.10174	0.257284
chr1	26123212	26123213	rs74644097	G	A	0.0199	1.18882	-2.53568	-1.34686
chr1	26124679	26124680	rs151143753	G	A	0.0129	-2.74852	2.20543	-0.543081
chr1	26127019	26127020	rs13373825	G	A	0.7893	0.873676	-1.50177	-0.628097
chr1	26132540	26132541	rs115183232	C	T	0.0388	-1.28774	0.445375	-0.842369
chr1	26134823	26134824	rs542119640	G	GC	0.7803	2.10714	-3.04984	-0.942698
chr1	26134824	26134825	rs561304535;rs563589400	G	C,GCC	0.7803	2.48462	-3.10127	-0.616647
chr1	26137816	26137817	rs74753273	G	T	0.0348	1.90675	-3.29525	-1.3885
chr1	26175517	26175518	rs2745538	T	C	0.2256	1.15813	-2.00775	-0.849622
chr1	26222422	26222423	rs115760190	G	A	0.0169	1.07967	-2.37567	-1.29599
chr1	26235815	26235816	rs807056	C	T	0.5606	-1.19986	-0.63508	-1.83494
chr1	26324519	26324520	rs11247841	T	C	0.6551	0.870594	-1.19306	-0.322462
chr1	26344476	26344477	rs3008244	G	A	0.8608	-1.1519	-1.0316	-2.1835
chr1	26348048	26348049	rs4659362	G	A	0.3032	1.01568	-2.65813	-1.64245
chr1	26362000	26362001	rs6665062	C	T	0.1879	-1.53681	-0.00485634	-1.54167
chr1	26393346	26393347	rs61775417	C	G	0.1799	1.52294	-1.62351	-0.100573
chr1	26394996	26394997	rs3008226	A	C	0.1859	0.933528	-1.85609	-0.922558
chr1	26397285	26397286	rs7520344	C	T	0.1799	1.80487	-2.38626	-0.581396
chr1	26402620	26402621	rs3008232	A	G	0.1849	1.10684	-1.949	-0.842156
chr1	26409800	26409801	rs55912918	C	T	0.1819	-1.01899	-0.197699	-1.21669
chr1	26411970	26411971	rs12067677	C	T	0.1849	-1.07256	-0.621236	-1.6938
chr1	26412020	26412021	rs72666316	C	G	0.0457	1.41944	-2.25575	-0.836315
chr1	26421285	26421286	rs34164928	G	A	0.0258	-1.1316	-1.44353	-2.57513
chr1	26430446	26430447	rs2783640	T	C	0.1829	-1.19394	-0.379369	-1.57331
chr1	26437261	26437262	rs61776582	A	C	0.1789	-1.66015	-0.713571	-2.37372
chr1	26455811	26455812	rs61776616	C	T	0.1789	-2.44351	-1.20796	-3.65146
chr1	26482410	26482411	rs75204979	G	A	0.2008	1.08147	-2.51021	-1.42873
chr1	26485516	26485517	rs3748854	G	C	0.3121	0.900763	-0.899017	0.00174624
chr1	26498250	26498251	rs41305771	G	A	0.0229	2.06983	-3.42545	-1.35563
chr1	26504755	26504756	rs2783631	G	A	0.3012	-0.977932	-0.887324	-1.86526
chr1	26508537	26508538	rs114806650	C	T	0.0368	-0.865622	-1.12747	-1.99309
chr1	26527254	26527255	rs12145714	G	A	0.2455	-1.07349	-0.291975	-1.36546
chr1	26527782	26527783	rs6703730	G	A	0.331	0.951919	-1.63298	-0.681057
chr1	26527809	26527810	rs1889756	G	A	0.2614	-0.982508	-1.18484	-2.16735
chr1	26545276	26545277	rs6697436	T	C	0.1262	1.30493	-2.57134	-1.26641
chr1	26560365	26560366	rs3795689	C	G	0.172	-1.07749	0.860166	-0.217324
chr1	26560961	26560962	rs11247878	C	T	0.1262	-1.04716	0.486761	-0.560399
chr1	26561219	26561220	rs6698557	G	C	0.171	-0.941313	-1.07866	-2.01998
chr1	26561239	26561240	rs34959549	G	A	0.0338	-1.07702	-0.691863	-1.76889
chr1	26561368	26561369	rs115989039	G	A	0.0159	-0.91629	-1.39904	-2.31533
chr1	26580936	26580937	rs4659416	T	G	0.6322	-2.12504	-1.4976	-3.62264
chr1	26583659	26583660	rs7542930	G	A	0.1064	-1.34248	0.117108	-1.22537
chr1	26583680	26583681	rs7513945	T	C	0.9304	-1.1642	-1.43595	-2.60016
chr1	26602250	26602251	rs12732295	C	T	0.6322	1.14966	-1.2162	-0.0665416
chr1	26602566	26602567	rs34753989	TGA	T	0.1889	-1.08669	-0.387069	-1.47376
chr1	26606290	26606291	rs61775082	C	T	0.1431	1.41578	-1.6751	-0.259321
chr1	26607004	26607005	rs34824071	C	A	0.2982	-0.888854	-1.49462	-2.38347
chr1	26607122	26607123	rs12759434	C	T	0.6282	-0.895279	-0.321296	-1.21658
chr1	26608648	26608649	rs12750420	G	A	0.3032	-1.52084	-1.02985	-2.55069
chr1	26608781	26608782	rs34209692	C	T	0.3022	-1.25569	-0.0373522	-1.29305
chr1	26612041	26612042	rs11247898	A	G	0.9304	-0.891296	-0.247306	-1.1386
chr1	26613703	26613704	rs12563057	G	A	0.0746	-0.930218	0.790322	-0.139896
chr1	26632780	26632781	rs3795684	C	T	0.7356	-1.00548	-0.408432	-1.41391
chr1	26642088	26642089	rs4501829	C	T	0.9264	-1.63001	1.06228	-0.567735
chr1	26644398	26644399	rs41285347	C	T	0.1899	-2.04208	0.596732	-1.44535
chr1	26644697	26644698	rs12090258	C	T	0.1899	-1.0933	-1.01553	-2.10883
chr1	26647948	26647949	rs7416513	G	C	0.7366	-0.947814	-0.576202	-1.52402
chr1	26662903	26662904	rs72649360	C	T	0.3022	1.00947	-1.45987	-0.450403
chr1	26686836	26686837	rs11806568	C	A	0.1899	-1.33373	-1.23577	-2.5695
chr1	26690480	26690481	rs7547496	T	C	0.6302	1.14895	-1.16045	-0.0114989
chr1	26697397	26697398	rs61776528	T	C	0.1004	1.29803	-1.47897	-0.180941
chr1	26704443	26704444	rs4636445	C	A	0.0815	-1.09104	-1.05336	-2.1444
chr1	26723137	26723138	rs111248238	C	G	0.5507	-0.900874	-2.16392	-3.0648
chr1	26723143	26723144	rs77533714	A	G	0.3628	1.41718	-2.75021	-1.33302
chr1	26743677	26743678	rs11581294	T	G	0.1799	0.912778	-2.47898	-1.5662
chr1	26743902	26743903	rs6683792	C	T	0.3131	1.36321	-1.98354	-0.620334
chr1	26758601	26758602	rs3811462	T	C	0.7823	-1.70665	-1.05996	-2.76661
chr1	26759148	26759149	rs3811461	A	G	0.2346	-1.44461	0.0785946	-1.36602
chr1	26835530	26835531	rs192621680	C	T	0.2614	-1.44889	-1.91868	-3.36757
chr1	26857825	26857826	rs75194483	G	A	0.0119	-1.01474	-0.149823	-1.16456
chr1	26872553	26872554	rs12723936	A	G	0.2833	1.07128	-1.65281	-0.58153
chr1	27004589	27004590	rs6674802	T	C	0.0527	0.90312	-1.81735	-0.914234
chr1	27019743	27019744	rs12738345	T	C	0.0736	-1.00587	-0.750773	-1.75664
chr1	27022867	27022868	rs561568918	C	T	0.0109	0.942462	-1.22319	-0.280731
chr1	27114446	27114447	rs71636780	G	A	0.0726	-1.84987	0.416089	-1.43378
chr1	27216668	27216669	rs11555809	G	A	0.0755	2.54806	-3.01109	-0.463029
chr1	27234487	27234488	rs1187950	C	T	0.0348	1.17104	-1.61393	-0.442893
chr1	27248644	27248645	rs10493037	A	G	0.1332	1.08094	-1.90973	-0.828791
chr1	27290649	27290650	rs72651568	T	G	0.3867	-1.37802	-0.779469	-2.15749
chr1	27319876	27319877	rs35859457	C	T	0.0497	-0.944509	-0.308871	-1.25338
chr1	27328191	27328192	rs36092677	A	G	0.0557	0.955307	-1.37435	-0.419045
chr1	27393393	27393394	rs75729933	G	A	0.0149	1.10998	-2.89992	-1.78994
chr1	27618970	27618971	rs77677906	C	A	0.0219	0.949664	-1.70407	-0.754408
chr1	27668747	27668748	rs7533455	A	G	0.0239	1.08939	-3.11144	-2.02205
chr1	27677065	27677066	rs41291092	A	C	0.0229	-0.8751	0.207443	-0.667658
chr1	27686946	27686947	rs569570988	A	C	0.0209	1.23509	-0.315012	0.920073
chr1	27692650	27692651	rs189532370	C	A	0.0139	0.902798	-2.32609	-1.42329
chr1	27693602	27693603	rs111620626	G	T	0.0298	1.58161	-2.0938	-0.512188
chr1	27709857	27709858	rs734725	G	T	0.1203	1.01377	-1.87794	-0.864168
chr1	27719091	27719092	rs115072736	A	T	0.1223	-1.97947	1.7277	-0.251769
chr1	27819121	27819122	rs574161061	T	G	0.0119	-1.21444	-1.1161	-2.33053
chr1	27840345	27840346	rs113571009	C	T	0.1093	-2.36821	-1.29572	-3.66393
chr1	27849937	27849938	rs4373782	T	C	0.0278	0.861635	-1.30619	-0.444555
chr1	27850074	27850075	rs74606343	T	C	0.1163	1.00623	-1.49873	-0.492504
chr1	27854618	27854619	rs546417705	T	C	0.0169	1.13272	-1.72739	-0.594667
chr1	27899402	27899403	rs57467219	A	C	0.0159	-1.31631	-1.21463	-2.53094
chr1	27908378	27908379	rs72886318	G	A	0.0159	1.01207	-1.40014	-0.388075
chr1	27916654	27916655	rs36126726	GC	G	0.0169	0.920262	-1.75248	-0.832216
chr1	27958181	27958182	rs114357739	T	C	0.0179	-1.39725	0.674449	-0.722805
chr1	27958238	27958239	rs79004605	G	T	0.0179	1.27817	-1.9024	-0.62423
chr1	27982006	27982007	rs116378094	C	T	0.0189	-0.91118	-0.6303	-1.54148
chr1	27982368	27982369	rs4430355	G	A	0.9751	1.07585	-1.6126	-0.536749
chr1	27995516	27995517	rs61787101	C	T	0.9751	-1.57584	-1.30608	-2.88192
chr1	27995528	27995529	rs112472381	C	T	0.5885	-1.76441	-1.2209	-2.98531
chr1	28082339	28082340	rs76303419	C	T	0.0189	0.84961	-1.89198	-1.04237
chr1	28154415	28154416	rs75464283	T	C	0.0159	-3.12532	3.06358	-0.0617467
chr1	28154559	28154560	rs12028063	G	C	0.0189	1.14518	-3.10361	-1.95843
chr1	28189697	28189698	rs76901836	G	C	0.0258	0.854753	-1.0969	-0.242144
chr1	28211383	28211384	rs2236074	G	A	0.3857	-1.2865	-0.0218342	-1.30834
chr1	28261494	28261495	rs45461292	C	T	0.0169	-0.966431	-0.763497	-1.72993
chr1	28286022	28286023	rs113568867	C	T	0.0149	-0.886875	-0.210071	-1.09695
[truncated: 93,692 more rows]

## Sheet: specific deltaSVM
chr	start	end	RSID	ref allele	alt allele	freq	deltaSVM	ref SVM score	alt SVM score
chr1	10351	10352	rs555500075	T	TA	0.4264	0.628859	-0.643665	-0.0148062
chr1	564597	564598	rs6594028	A	G	0.1074	0.804905	-0.888037	-0.0831317
chr1	565741	565742	rs535902969	A	C	0.0865	-0.664284	-0.419913	-1.0842
chr1	568213	568214	rs373437560	C	T	0.1272	-0.593942	-0.497476	-1.09142
chr1	568823	568824	rs527519500	C	T	0.0388	0.88536	-1.43959	-0.554228
chr1	569203	569204	rs112660509	T	C	0.3867	0.697443	-0.972446	-0.275003
chr1	569542	569543	rs538153094	G	A	0.0199	-0.709994	0.278181	-0.431813
chr1	743020	743021	rs3964475	T	C	0.2604	0.7569	-1.51317	-0.756267
chr1	752477	752478	rs146277091	G	A	0.0427	-0.896184	0.489515	-0.406669
chr1	762631	762632	rs3131948	T	A	0.8718	1.02457	-1.01533	0.0092394
chr1	770885	770886	rs371458725	G	A	0.0915	0.605933	-0.348356	0.257577
chr1	821925	821926	rs35660652	C	G	0.0755	-0.899171	-0.568005	-1.46718
chr1	834197	834198	rs28385272	T	C	0.2087	-0.669763	-0.473514	-1.14328
chr1	840225	840226	rs569746808	G	GT	0.0129	-0.67633	0.193229	-0.483102
chr1	842361	842362	rs28540380	C	T	0.2237	-1.82496	-0.851072	-2.67603
chr1	845508	845509	rs565071104	T	G	0.1581	0.748563	-1.05647	-0.307903
chr1	856328	856329	rs7414599	C	G	0.2097	-0.58789	-0.482539	-1.07043
chr1	856435	856436	rs34105146	TG	T	0.1789	0.874384	-1.3138	-0.439411
chr1	856556	856557	rs147866846	A	C	0.0189	-0.628965	-0.304295	-0.93326
chr1	873393	873394	rs1110051	A	G	0.0229	-0.650529	0.0721037	-0.578426
chr1	896475	896476	rs28393498	A	G	0.9523	-0.600122	0.169562	-0.430561
chr1	901558	901559	rs13303160	G	A	0.9056	0.891496	-0.394071	0.497425
chr1	911594	911595	rs7417106	A	G	0.7873	1.25924	-1.27096	-0.0117291
chr1	917314	917315	rs7547878	G	A	0.1799	0.72291	-0.811281	-0.0883714
chr1	917491	917492	rs28434575	C	T	0.163	0.613233	-1.07161	-0.458381
chr1	919854	919855	rs116781904	G	A	0.1183	-0.939234	-0.679301	-1.61854
chr1	935832	935833	rs3128115	C	G	0.7893	-0.714609	0.115993	-0.598616
chr1	941538	941539	rs9778087	C	T	0.3877	-0.945687	0.0701029	-0.875584
chr1	949122	949123	rs140198533	G	A	0.0109	-0.745461	-0.666821	-1.41228
chr1	956060	956061	rs199682825	A	AGGGGGGGG,AGGGGGGGGG	0.3459	0.792188	-0.934946	-0.142758
chr1	969772	969773	rs115170833	C	T	0.0239	0.910091	-0.577047	0.333045
chr1	984301	984302	rs9442391	T	C	0.5636	0.713304	-1.17166	-0.45836
chr1	1004956	1004957	rs4073176	G	A	0.5755	0.593381	-1.48883	-0.895444
chr1	1015816	1015817	rs12746483	G	A	0.7247	-0.703243	-0.182462	-0.885705
chr1	1026800	1026801	rs4562563	T	A	0.5944	-0.932988	-0.81385	-1.74684
chr1	1027069	1027070	rs11260590	G	A	0.1183	-0.994757	0.348962	-0.645795
chr1	1045605	1045606	rs12080505	A	C	0.0109	0.851829	-1.6497	-0.797872
chr1	1050998	1050999	rs538430583	C	T	0.1004	-1.03451	-0.984134	-2.01864
chr1	1051868	1051869	rs6658634	G	C	0.0288	0.777223	-1.21651	-0.439291
chr1	1052107	1052108	rs6673257	A	G	0.0298	-1.03038	-0.369432	-1.39982
chr1	1058918	1058919	rs535350689	C	T	0.0189	-0.601102	-1.69656	-2.29767
chr1	1058948	1058949	rs534834785	C	T	0.0169	1.34465	-2.4329	-1.08825
chr1	1058951	1058952	rs557828959	C	A	0.0169	0.661197	-2.17059	-1.50939
chr1	1067864	1067865	rs9442358	A	C	0.9245	0.695347	-1.51474	-0.819389
chr1	1068279	1068280	rs74048016	C	G	0.0268	0.62962	-1.42414	-0.794519
chr1	1068882	1068883	rs61766346	G	A	0.1968	-0.708002	-0.387249	-1.09525
chr1	1071117	1071118	rs10907183	G	C	0.6113	0.733148	-1.50885	-0.775701
chr1	1078582	1078583	rs12737205	C	T	0.0646	0.645616	-1.26458	-0.618965
chr1	1092366	1092367	rs113657720	C	T	0.2843	-0.773138	-0.199082	-0.97222
chr1	1092423	1092424	rs78975118	A	G	0.0288	0.650876	-0.628973	0.0219032
chr1	1092460	1092461	rs114528345	G	A	0.0239	0.605183	-0.026309	0.578874
chr1	1092481	1092482	rs115785548	T	C	0.0249	1.03236	-1.26547	-0.233117
chr1	1092562	1092563	rs57527288	G	T	0.0378	-0.589424	-0.189599	-0.779023
chr1	1109103	1109104	rs74045197	G	T	0.0557	0.963059	-0.616378	0.346681
chr1	1109251	1109252	rs5010607	A	G	0.2982	-0.820726	0.496937	-0.323789
chr1	1109652	1109653	rs11260538	G	A	0.0865	-0.630745	-0.31712	-0.947865
chr1	1144121	1144122	rs57356573	T	C	0.0278	0.840093	-1.31538	-0.475287
chr1	1149315	1149316	rs35737009	C	G	0.0159	0.760623	-1.38669	-0.626069
chr1	1150763	1150764	rs3813202	G	A	0.0318	-0.77825	-0.279027	-1.05728
chr1	1160808	1160809	rs3753343	T	C	0.0885	0.644943	-1.53888	-0.893935
chr1	1161640	1161641	rs78913203	G	A	0.0885	0.692287	0.289968	0.982255
chr1	1161731	1161732	rs550794034	G	A	0.0716	-0.87908	0.0262311	-0.852849
chr1	1161754	1161755	rs142693327	G	A	0.0875	1.04812	-1.35632	-0.308198
chr1	1182325	1182326	rs552383056	T	C	0.0119	1.26839	-0.912708	0.355682
chr1	1185557	1185558	rs142609243	T	C	0.0676	0.927852	-0.970469	-0.0426168
chr1	1234544	1234545	rs568753041	C	T	0.0139	0.599897	-0.972468	-0.372571
chr1	1239934	1239935	rs12410087	A	C	0.0984	0.629404	-0.936	-0.306596
chr1	1259560	1259561	rs189752537	A	G	0.7982	-1.31432	-0.840946	-2.15526
chr1	1260167	1260168	rs61766199	C	A	0.9215	-0.927781	-0.204935	-1.13272
chr1	1273277	1273278	rs307370	A	G	0.835	0.624056	-1.08523	-0.461173
chr1	1285357	1285358	rs11587525	A	G	0.9662	-0.874211	0.0722707	-0.80194
chr1	1287126	1287127	rs307380	G	A	0.9225	-0.780671	0.0715407	-0.709131
chr1	1294137	1294138	esv3584993	ACCGCACCCTTGGAGGGACAAGAAGGTCCGAGGACATGGGCCCCTGATACCACGTGAT	A	0.0169	1.23376	-0.894666	0.339097
chr1	1294286	1294287	rs12731385	C	A	0.9215	-0.759102	-0.345435	-1.10454
chr1	1295881	1295882	rs564906656	G	GGGGGCGGGC	0.9185	0.683026	-1.02895	-0.345922
chr1	1307599	1307600	rs35860770	C	T	0.0457	0.666604	-0.569657	0.0969474
chr1	1310646	1310647	rs139833628	C	T	0.0179	-0.68315	0.0343505	-0.6488
chr1	1310923	1310924	rs2765033	T	C	0.9672	-0.64658	0.209493	-0.437087
chr1	1335301	1335302	rs1240707	C	T	0.0845	-1.16376	0.473834	-0.689922
chr1	1342268	1342269	rs536111712	T	G	0.1123	-1.15878	-0.253345	-1.41213
chr1	1342393	1342394	rs11548045	G	A	0.0417	-0.807325	-0.083052	-0.890377
chr1	1343460	1343461	rs111873504	G	A	0.0258	0.631093	-1.45452	-0.823427
chr1	1355582	1355583	rs1781133	C	A	0.0934	-0.625915	-0.313773	-0.939688
chr1	1374804	1374805	rs2275916	G	C	0.0179	-0.599043	-0.284292	-0.883335
chr1	1375184	1375185	rs1240699	G	C	0.1312	-0.71205	-0.201035	-0.913085
chr1	1375206	1375207	rs140247431	T	C	0.0179	0.807293	-2.01863	-1.21134
chr1	1386088	1386089	rs149262155	C	T	0.0169	-0.626556	-0.446468	-1.07302
chr1	1387919	1387920	rs1625156	G	A	0.1849	0.908376	-0.357618	0.550757
chr1	1425815	1425816	rs149187984	G	A	0.0577	-0.826046	-0.642463	-1.46851
chr1	1430515	1430516	rs113215852	G	A	0.0875	0.72885	-0.869063	-0.140213
chr1	1430689	1430690	rs376219560	C	T	0.0149	-0.652398	-0.436214	-1.08861
chr1	1431368	1431369	rs140821046	C	T	0.0129	-1.50343	-0.808813	-2.31225
chr1	1444148	1444149	rs190181683	G	C	0.0129	-0.590442	-0.607397	-1.19784
chr1	1444366	1444367	rs530944414	G	T	0.0139	-0.77398	0.23703	-0.53695
chr1	1469032	1469033	rs2889625	C	T	0.0358	-0.893839	-0.627659	-1.5215
chr1	1469199	1469200	rs535958228	A	G	0.0159	0.823664	-1.09122	-0.267553
chr1	1469262	1469263	rs6681228	G	T	0.0577	1.57049	-1.59499	-0.0245051
chr1	1484461	1484462	rs77658544	C	G	0.0467	-0.798096	-0.0818991	-0.879995
chr1	1490558	1490559	rs3820075	A	G	0.2863	0.90348	-1.47528	-0.571796
chr1	1498257	1498258	rs114305501	G	A	0.0149	1.4802	-1.73397	-0.253774
chr1	1535758	1535759	rs72897847	C	T	0.3439	1.02871	-1.65307	-0.624357
chr1	1555365	1555366	rs9329576	T	C	0.7594	-0.887417	0.122929	-0.764488
chr1	1555395	1555396	rs12725787	C	T	0.0537	0.603755	-0.603287	0.000467308
chr1	1567205	1567206	rs28456011	G	A	0.163	-0.756455	-0.63817	-1.39462
chr1	1610446	1610447	rs61776791	C	T	0.0149	-1.54624	-0.326258	-1.87249
chr1	1617364	1617365	rs192679506	G	T	0.0129	0.780284	-1.46002	-0.679736
chr1	1617455	1617456	rs144393021	A	AT	0.4483	-0.836322	-0.310419	-1.14674
chr1	1646979	1646980	rs61776853	A	C	0.9563	-0.651409	-0.212996	-0.864404
chr1	1669963	1669964	rs369037660	G	A	0.4175	0.871146	-1.17003	-0.298885
chr1	1670044	1670045	rs200217868	C	T	0.4553	-0.734025	-0.562334	-1.29636
chr1	1677960	1677961	rs200716344	GT	G	0.3698	0.602505	-0.702797	-0.100291
chr1	1690129	1690130	rs529792614	G	C	0.0149	-0.722332	0.311145	-0.411187
chr1	1695573	1695574	rs876029	G	T	0.9314	0.639898	-0.391301	0.248597
chr1	1707739	1707740	rs12041925	T	G	0.2316	-0.65521	-0.204729	-0.859939
chr1	1710034	1710035	rs12058658	C	T	0.7376	-1.18223	-0.303518	-1.48575
chr1	1712077	1712078	rs56400815	C	T	0.0736	-0.943826	0.0609673	-0.882859
chr1	1712229	1712230	rs10907194	C	T	0.2306	-1.48	0.655758	-0.824245
chr1	1714344	1714345	rs56693667	T	G	0.1948	0.648102	-1.27699	-0.628888
chr1	1738370	1738371	rs11585349	C	T	0.1203	0.997996	-0.94895	0.0490455
chr1	1779035	1779036	rs6692959	T	C	0.9404	-1.0232	0.103467	-0.919732
chr1	1832824	1832825	rs7548509	C	A	0.505	0.879512	-0.620075	0.259437
chr1	1851211	1851212	rs28706999	C	T	0.0437	1.18889	-0.791069	0.39782
chr1	1860140	1860141	rs28531873	C	T	0.0437	1.28463	-2.19941	-0.914777
chr1	1875620	1875621	rs2803334	G	C	0.498	0.609388	-0.898615	-0.289227
chr1	1909317	1909318	rs61776976	G	A	0.3091	0.715488	-0.894075	-0.178587
chr1	1920994	1920995	rs116692827	G	A	0.0408	0.833101	-1.68272	-0.84962
chr1	1950550	1950551	rs72911372	G	A	0.1779	0.8207	-1.59651	-0.775811
chr1	1964074	1964075	rs16824630	T	C	0.1362	-0.844358	-0.385746	-1.2301
chr1	1970128	1970129	rs75228711	T	G	0.0268	-0.681108	-0.396193	-1.0773
chr1	1986097	1986098	rs28377232	A	G	0.0109	0.808943	-1.0003	-0.191355
chr1	1991172	1991173	rs2247923	A	G	0.3429	0.999555	-1.45072	-0.451161
chr1	1991240	1991241	rs1105100	C	G	0.1928	0.610617	-0.455364	0.155252
chr1	2019705	2019706	rs1108262	G	C	0.3211	0.608979	-0.492142	0.116837
chr1	2020003	2020004	rs79953122	C	T	0.0378	-0.680416	-0.290102	-0.970517
chr1	2023218	2023219	rs17232167	G	A	0.1153	-0.66434	-1.25636	-1.9207
chr1	2030006	2030007	rs58602729	CCT	C	0.3708	-0.611191	0.0530234	-0.558167
chr1	2056490	2056491	rs139032107	G	A	0.0268	0.793297	-0.12377	0.669527
chr1	2057749	2057750	rs3107154	A	C	0.8926	0.67839	-0.618247	0.0601431
chr1	2071555	2071556	rs436045	A	G	0.7078	-0.641578	-0.0203409	-0.661919
chr1	2087093	2087094	rs144917548	A	AATGATGATG	0.3897	-0.998608	-0.651571	-1.65018
chr1	2087556	2087557	rs3123592	T	C	0.0964	0.673074	-1.12629	-0.453219
chr1	2092282	2092283	rs12094159	C	T	0.0954	-0.662661	-0.608319	-1.27098
chr1	2107060	2107061	rs262639	G	T	0.2932	-0.634706	-0.800435	-1.43514
chr1	2144981	2144982	rs2480714	G	T	0.6829	-0.990861	0.410768	-0.580093
chr1	2146698	2146699	rs77699439	G	A	0.0278	-0.670864	-0.432824	-1.10369
chr1	2161964	2161965	rs148644634	C	T	0.0209	0.816193	-0.402403	0.413791
chr1	2204754	2204755	rs7553178	G	A	0.663	-0.674286	-0.393264	-1.06755
chr1	2210767	2210768	rs79942186	G	A	0.0278	0.631428	-1.23689	-0.605464
chr1	2215908	2215909	rs2643913	A	C	0.3569	0.615689	-0.99728	-0.381591
chr1	2215912	2215913	rs75187898	G	C	0.0288	0.697076	-0.81903	-0.121955
chr1	2215977	2215978	rs72927851	G	C	0.0278	0.73072	-1.28132	-0.550596
chr1	2218506	2218507	rs12120270	C	T	0.1153	0.658201	-0.446622	0.211579
chr1	2246060	2246061	rs61762078	G	T	0.0964	-0.624141	0.272668	-0.351473
chr1	2263426	2263427	rs34058136	G	A	0.1849	-0.685425	-0.701878	-1.3873
chr1	2263460	2263461	rs138146324	G	A	0.0129	-0.906578	-0.428968	-1.33555
chr1	2279816	2279817	rs56030548	C	T	0.2575	0.609166	-1.04512	-0.43595
chr1	2313539	2313540	rs2843132	A	G	0.8002	0.760861	-0.442669	0.318192
chr1	2319529	2319530	rs2645061	G	T	0.0239	0.637752	-0.51993	0.117821
chr1	2372140	2372141	rs12728898	G	A	0.0417	-0.725062	-0.141737	-0.866799
chr1	2373235	2373236	rs72644619	A	C	0.0129	1.07136	-0.888388	0.182975
chr1	2373386	2373387	rs6669420	C	A	0.4105	0.709031	-0.483232	0.225798
chr1	2373587	2373588	rs191055918	G	A	0.0159	1.03655	-0.23495	0.801603
chr1	2378237	2378238	rs78792823	C	T	0.0447	0.659822	0.213648	0.87347
chr1	2379704	2379705	rs942820	A	G	0.5	-0.656871	-0.268348	-0.925219
chr1	2387100	2387101	rs4648845	C	T	0.4761	-0.683986	-0.0440846	-0.728071
chr1	2387133	2387134	rs76122157	G	C	0.0497	0.84299	-1.03621	-0.193222
chr1	2387714	2387715	rs12037821	C	T	0.1431	0.71313	-1.51565	-0.802524
chr1	2391251	2391252	rs16824398	A	C	0.492	0.853444	-0.344478	0.508965
chr1	2399961	2399962	rs561547583	A	G	0.0258	0.946418	-1.9167	-0.97028
chr1	2450309	2450310	rs56168662	G	C	0.0169	0.63926	-0.863754	-0.224495
chr1	2450393	2450394	rs2246732	A	G	0.2117	0.626901	-1.25059	-0.623694
chr1	2469206	2469207	rs2495377	C	G	0.0119	1.06867	-1.74895	-0.680281
chr1	2469242	2469243	rs2495376	C	T	0.0119	-0.782846	-0.18211	-0.964957
chr1	2472945	2472946	rs2495369	G	A	0.0119	-0.661163	-0.913718	-1.57488
chr1	2480245	2480246	rs568710798	C	A	0.171	0.66177	-0.92601	-0.26424
chr1	2507937	2507938	rs10752745	A	G	0.4662	-0.834966	-0.166758	-1.00172
chr1	2509874	2509875	rs71630981	C	G	0.0179	-0.758516	-0.108889	-0.867404
chr1	2512709	2512710	rs10910096	T	C	0.4692	0.810362	-1.46689	-0.656531
chr1	2518213	2518214	rs371199788	G	A	0.0169	-0.624305	-0.263358	-0.887663
chr1	2518409	2518410	rs143250534	C	T	0.0209	-0.646264	-1.10117	-1.74743
chr1	2539399	2539400	rs4445406	T	C	0.329	-1.1192	0.313992	-0.805206
chr1	2539531	2539532	rs10910108	A	G	0.329	-0.752552	-0.0857575	-0.838309
chr1	2539602	2539603	rs60687045	G	A	0.3091	0.991099	-1.96132	-0.970219
chr1	2539673	2539674	rs148683401	C	A	0.0199	0.802323	-2.12127	-1.31895
chr1	2561258	2561259	rs70956313	GCCC	G	0.6909	-0.929576	-0.481894	-1.41147
chr1	2565229	2565230	rs12741533	G	C	0.0875	0.79561	-1.78802	-0.992411
chr1	2565326	2565327	rs55649610	G	T	0.0258	-0.830742	0.12979	-0.700952
chr1	2584786	2584787	rs56375117	G	A	0.1262	-1.23783	0.84	-0.397829
chr1	2585800	2585801	rs28498367	G	C	0.1153	0.846151	-1.12209	-0.275937
chr1	2603214	2603215	rs145564931	A	G	0.7495	0.648175	-1.27568	-0.62751
chr1	2615534	2615535	rs548963268	G	A	0.0139	-0.720298	-0.341052	-1.06135
chr1	2616130	2616131	rs538996413	T	C	0.1123	-1.31283	0.430999	-0.881832
chr1	2616131	2616132	rs559036277	G	A	0.1123	-1.1982	0.577008	-0.621196
chr1	2618174	2618175	rs149212243	T	C	0.2197	-1.01624	0.391024	-0.625212
chr1	2618180	2618181	rs565396242	A	G	0.1252	-0.658057	0.678618	0.0205614
chr1	2618556	2618557	rs199938865	C	T	0.0885	0.867338	-1.04318	-0.175841
chr1	2620834	2620835	rs368868269	G	A	0.0308	-1.13417	-0.0820782	-1.21625
chr1	2620836	2620837	rs61765695	C	T	0.0954	-0.638899	0.0936103	-0.545289
chr1	2621267	2621268	rs571639229	T	C	0.0199	-1.28148	-0.59442	-1.8759
chr1	2621351	2621352	rs28774982	C	G	0.6899	1.27813	-0.799635	0.478496
chr1	2626769	2626770	rs537906427	C	T	0.0189	1.00284	-0.888847	0.113993
chr1	2626894	2626895	rs376952153	G	A	0.0199	-0.858368	-0.296651	-1.15502
chr1	2627093	2627094	rs28486014	C	A	0.6909	0.970253	-0.148351	0.821903
chr1	2627906	2627907	rs201847726	T	A	0.2386	0.61474	-0.943704	-0.328964
chr1	2628033	2628034	rs568931259	C	T	0.0139	-0.958637	-0.0727334	-1.03137
chr1	2628325	2628326	rs28655771	A	G	0.8509	-0.640684	-1.29959	-1.94027
chr1	2629001	2629002	rs4648685	C	A	0.0765	-1.04448	-0.276986	-1.32146
chr1	2629188	2629189	rs557085806	G	C	0.0179	-0.738442	-0.0189898	-0.757432
chr1	2629463	2629464	rs201910133	G	A	0.2336	0.664139	-0.432199	0.23194
chr1	2629950	2629951	rs11516513	A	G	0.6938	0.791038	-0.463938	0.3271
chr1	2630263	2630264	rs200184868	C	G	0.0209	1.3762	-0.676062	0.700139
chr1	2630272	2630273	rs111589247	C	G	0.0199	0.618356	-0.0973792	0.520977
chr1	2631469	2631470	rs28521907	T	C	0.0219	1.03632	-0.316646	0.719677
chr1	2631485	2631486	rs12746691	C	T	0.4404	-0.647174	0.120684	-0.52649
chr1	2631625	2631626	rs150868602	C	T	0.0229	1.31283	-0.881832	0.430999
chr1	2632356	2632357	rs112030561	C	G	0.0338	-0.947564	0.133207	-0.814357
chr1	2632372	2632373	rs374391648	C	G	0.0577	0.678854	-0.704914	-0.0260606
chr1	2632379	2632380	rs377756586	G	A	0.0577	-0.590313	0.136553	-0.45376
chr1	2686182	2686183	rs199671872	G	T	0.3082	1.06018	-1.84102	-0.780845
chr1	2688674	2688675	rs559480543	C	G	0.0447	0.732007	-2.3738	-1.6418
chr1	2689259	2689260	rs545126198	C	T	0.0159	-0.680689	0.665687	-0.0150018
chr1	2692109	2692110	rs538168015	G	T	0.0268	0.734272	-2.37307	-1.6388
chr1	2706161	2706162	rs557596918	G	C	0.0129	-0.629982	-0.60042	-1.2304
chr1	2707956	2707957	rs57572926	T	A	0.0934	-0.65461	-0.599579	-1.25419
chr1	2756396	2756397	rs4648383	C	T	0.5368	-0.591006	-1.02241	-1.61342
chr1	2771622	2771623	rs34161193	G	A	0.4125	1.42311	-1.91951	-0.496402
chr1	2771677	2771678	rs35767265	C	A	0.4125	0.646824	-1.33805	-0.691228
chr1	2791142	2791143	rs10910023	C	T	0.5527	0.89132	-1.76544	-0.874124
chr1	2791415	2791416	rs146827924	G	C	0.0199	-0.6989	-0.796938	-1.49584
chr1	2838797	2838798	rs12045117	G	C	0.2584	-0.631293	0.340162	-0.29113
chr1	2843849	2843850	rs4648436	G	A	0.2584	1.25463	-1.75524	-0.500603
chr1	2866931	2866932	rs2606413	C	T	0.2833	-0.859449	-1.02518	-1.88463
chr1	2880383	2880384	rs3001799	A	G	0.16	-1.51547	0.621192	-0.894277
chr1	2899961	2899962	rs111828763	G	C	0.0119	0.942836	-1.72156	-0.778726
chr1	2910395	2910396	rs60017523	T	C	0.1083	-0.678863	1.17632	0.497457
chr1	2918020	2918021	rs56008028	A	G	0.1133	0.602539	-1.03904	-0.436502
chr1	2928975	2928976	rs6681651	C	T	0.1262	0.746929	-1.11529	-0.368356
chr1	2971451	2971452	rs56069604	T	C	0.1501	-1.0226	-0.166355	-1.18895
chr1	2971641	2971642	rs145358061	A	AT	0.1501	-0.81511	-0.836746	-1.65186
chr1	2991807	2991808	rs2993482	T	G	0.0258	0.645756	-0.88548	-0.239724
chr1	2999517	2999518	rs11581212	A	G	0.1958	-1.19122	-0.400966	-1.59218
chr1	3010852	3010853	rs734372	G	A	0.3002	0.921686	-0.809782	0.111905
chr1	3010968	3010969	rs734374	A	C	0.2992	1.05593	-0.238158	0.817771
chr1	3010981	3010982	rs78021538	G	A	0.0109	-1.10392	0.105003	-0.998917
chr1	3014409	3014410	rs548149441	C	G	0.0119	1.3182	-1.78871	-0.470506
chr1	3014832	3014833	rs1474562	A	C	0.2992	0.600264	-1.07984	-0.479576
chr1	3021107	3021108	rs34368404	G	A	0.1054	-0.915872	-0.894783	-1.81065
chr1	3021295	3021296	rs55898371	A	C	0.1759	0.906085	-1.65512	-0.749033
chr1	3030100	3030101	rs12408126	G	A	0.1332	0.618182	-0.524946	0.0932364
chr1	3036601	3036602	rs143702617	T	A	0.0209	-1.46334	-0.393744	-1.85708
chr1	3041650	3041651	rs2817173	C	T	0.1551	-0.841306	-0.0717858	-0.913092
chr1	3043565	3043566	rs12410830	A	G	0.0338	-0.650268	-1.18588	-1.83615
chr1	3044433	3044434	rs72846807	G	A	0.0119	0.613675	0.00842997	0.622105
chr1	3044651	3044652	rs35529420	C	T	0.0547	0.692741	-0.706615	-0.0138746
chr1	3045231	3045232	rs147796784	CTCCCACCATGCTACTGGAGACCA	C	0.2763	0.791488	-1.39053	-0.59904
chr1	3050220	3050221	rs12022170	G	A	0.0636	-0.660036	-1.00759	-1.66763
chr1	3086933	3086934	rs71503051	C	A	0.0457	1.28424	-1.76896	-0.484724
chr1	3088053	3088054	rs34456377	C	A	0.0457	-1.10599	0.370891	-0.735094
chr1	3105615	3105616	rs115109932	G	A	0.0109	0.73835	-0.642715	0.0956348
chr1	3113147	3113148	rs7520732	A	G	0.1928	0.824468	-1.94989	-1.12543
chr1	3124079	3124080	rs7521987	A	G	0.1461	-0.710369	0.259573	-0.450796
chr1	3136194	3136195	rs79372668	C	A	0.0159	0.638503	-0.755579	-0.117076
chr1	3144473	3144474	rs114820997	A	C	0.0775	-0.874636	-0.0400107	-0.914647
chr1	3178486	3178487	rs76544063	G	C	0.0905	1.75895	-0.1415	1.61745
chr1	3212590	3212591	rs2500290	G	C	0.5577	-0.691257	-0.46646	-1.15772
chr1	3212930	3212931	rs60005551	G	A	0.2078	-0.596433	-0.814231	-1.41066
chr1	3218328	3218329	rs2455136	A	T	0.7555	1.36433	-0.67454	0.689794
chr1	3224802	3224803	rs2483258	A	G	0.7624	1.17121	-1.82817	-0.656961
chr1	3229989	3229990	rs2282193	T	C	0.173	1.10776	-1.01238	0.0953799
chr1	3230543	3230544	rs16824089	T	C	0.0984	0.612356	-1.31847	-0.70611
chr1	3262366	3262367	rs377373723	TGGTTCCTCCTGTGCTGCCCTCTC	T	0.3042	-0.624804	-0.54011	-1.16491
chr1	3267825	3267826	rs77270279	G	A	0.2376	1.51664	-1.83858	-0.321939
chr1	3277745	3277746	rs884308	C	T	0.4523	0.712947	-1.15208	-0.439135
chr1	3282666	3282667	rs55798279	T	C	0.0527	0.600758	-1.08542	-0.484664
chr1	3319060	3319061	rs1889124	A	G	0.7555	-0.754926	-0.110142	-0.865069
chr1	3319710	3319711	rs182476908	C	G	0.0159	-0.736691	-0.680552	-1.41724
chr1	3319806	3319807	rs2493306	C	T	0.0865	0.622545	-0.555315	0.0672299
chr1	3326795	3326796	rs6670123	C	G	0.159	-0.861505	-0.305962	-1.16747
chr1	3340346	3340347	rs2483233	A	G	0.9523	1.01237	-0.581122	0.431249
chr1	3349077	3349078	rs2483244	G	A	0.0527	0.947768	-0.183758	0.76401
chr1	3369582	3369583	rs2487669	C	T	0.0547	-0.806822	-0.0790586	-0.885881
chr1	3369819	3369820	rs56164540	C	T	0.0388	1.25165	-0.322154	0.929501
chr1	3371408	3371409	rs142378881	G	A	0.0537	1.34559	-2.01435	-0.668765
chr1	3376737	3376738	rs12145462	C	T	0.0338	0.725401	-0.271288	0.454113
chr1	3377122	3377123	rs59183260	C	T	0.0378	0.586895	-0.816137	-0.229242
chr1	3388555	3388556	rs11580089	A	G	0.0606	-0.680509	0.825441	0.144932
chr1	3398983	3398984	rs11579276	C	T	0.3827	-1.16905	-0.379618	-1.54867
chr1	3411562	3411563	rs2821036	G	A	0.0596	-1.38248	-0.248007	-1.63049
chr1	3411651	3411652	rs1935128	G	A	0.0586	0.945679	-0.865353	0.0803259
chr1	3412992	3412993	rs74050557	G	A	0.0298	0.652164	-1.55717	-0.905001
chr1	3418793	3418794	rs2821026	G	C	0.0875	-1.24824	0.0583242	-1.18991
chr1	3446310	3446311	rs11589175	G	A	0.1193	-0.778961	0.260554	-0.518407
chr1	3447277	3447278	rs75413213	G	A	0.0875	1.57809	-2.1535	-0.575414
chr1	3448359	3448360	rs28447582	G	A	0.4602	-0.629255	-0.0890767	-0.718332
chr1	3462330	3462331	rs78193450	C	T	0.0139	-0.639389	-0.773292	-1.41268
chr1	3475082	3475083	rs2821062	C	T	0.3032	-1.13632	-0.282145	-1.41846
chr1	3481968	3481969	rs2794352	G	C	0.2724	-1.4189	-0.304153	-1.72306
chr1	3490291	3490292	rs184603965	T	G	0.0109	-0.674274	0.278616	-0.395658
chr1	3498382	3498383	rs7528821	C	T	0.1501	-0.614051	-0.429039	-1.04309
chr1	3504486	3504487	rs530762981	A	C	0.827	0.783798	-0.859983	-0.0761849
chr1	3513982	3513983	rs36017484	T	G	0.0845	0.94652	-2.16109	-1.21457
chr1	3528291	3528292	rs60020855	GC	G	0.8748	1.0275	-1.98059	-0.953087
chr1	3531835	3531836	rs188448307	C	G,T	0.0189	0.787099	-1.83298	-1.04588
chr1	3535463	3535464	rs7538707	A	G	0.7913	1.14066	-1.87043	-0.729772
chr1	3535555	3535556	rs7534432	C	T	0.2982	-0.82688	-0.208022	-1.0349
chr1	3535556	3535557	rs7538796	A	G	0.2992	-0.798141	-0.185406	-0.983547
chr1	3547028	3547029	rs71634350	A	G	0.2535	-1.05922	0.643479	-0.415746
chr1	3585581	3585582	rs3765694	G	A	0.4513	0.708725	-0.122713	0.586011
chr1	3585863	3585864	rs11801431	T	G	0.0984	1.21505	-0.958038	0.257012
chr1	3600798	3600799	rs3765712	G	A	0.0984	-0.677836	0.0378968	-0.639939
chr1	3605507	3605508	rs78353993	G	A	0.0189	-1.40477	-0.442746	-1.84751
chr1	3605586	3605587	rs1885870	G	C	0.4036	0.610874	-1.52006	-0.909188
chr1	3605949	3605950	rs750963	C	T	0.159	-0.667951	-0.606527	-1.27448
chr1	3620434	3620435	rs12742969	A	G	0.4006	-0.690385	-0.215276	-0.905661
chr1	3634883	3634884	rs148855238	C	T	0.0179	-0.713671	-0.603551	-1.31722
chr1	3641412	3641413	rs1885868	T	C	0.0308	0.814624	-0.714792	0.0998321
chr1	3658769	3658770	rs12068191	T	C	0.0785	-0.880232	0.892151	0.0119186
chr1	3663640	3663641	rs75438821	C	T	0.3171	0.992791	-1.21306	-0.220267
chr1	3676597	3676598	rs1181884	T	C	0.1312	0.644781	-1.12682	-0.482037
chr1	3689888	3689889	rs2840327	G	A	0.0944	0.61385	-0.898612	-0.284762
chr1	3696535	3696536	rs3737593	A	G	0.1213	0.656376	-1.45449	-0.798116
chr1	3706837	3706838	rs139020638	C	T	0.0129	1.15611	-0.321389	0.834718
chr1	3707036	3707037	rs34094195	C	G	0.1093	0.67553	-0.433008	0.242523
chr1	3707591	3707592	rs75598464	T	C	0.0288	-0.670127	0.550905	-0.119223
chr1	3713268	3713269	rs77439315	A	G	0.0288	-0.762176	0.0137933	-0.748382
chr1	3713745	3713746	rs6424052	A	G	0.2137	0.767824	-1.22311	-0.455283
chr1	3718068	3718069	rs6703539	C	T	0.2565	0.670772	0.0262369	0.697009
chr1	3718489	3718490	rs6670245	A	G	0.1133	0.825486	-1.48063	-0.655148
chr1	3720992	3720993	rs35447451	A	AG	0.5696	-0.642571	-0.525307	-1.16788
chr1	3721858	3721859	rs6691991	G	C	0.2555	0.735061	-1.56898	-0.833916
chr1	3726356	3726357	rs138006781	G	A	0.0139	0.893953	-1.77314	-0.879188
chr1	3734370	3734371	rs1104855	G	C	0.5417	-0.701027	0.0455113	-0.655516
chr1	3744547	3744548	rs10797343	A	G	0.5706	-0.649943	0.299445	-0.350498
chr1	3756461	3756462	rs143529319	C	T	0.0179	-1.36039	0.587559	-0.772829
chr1	3772938	3772939	rs4648349	G	C	0.3022	-1.1422	-1.04728	-2.18949
chr1	3773033	3773034	rs4648425	T	C	0.3002	-0.954984	-0.157446	-1.11243
chr1	3773717	3773718	rs4648428	A	G	0.9423	0.851341	-0.987091	-0.13575
chr1	3774295	3774296	rs12722891	A	G	0.3032	0.661001	-0.506932	0.154069
chr1	3782114	3782115	rs12127483	G	A	0.1978	0.898516	-0.371494	0.527021
chr1	3786409	3786410	rs10909811	G	A	0.1163	-1.4058	-0.0767501	-1.48255
chr1	3786744	3786745	rs12740232	C	T	0.0865	0.630851	-1.04732	-0.416466
chr1	3809298	3809299	rs79308453	T	A	0.0388	-0.754993	0.239289	-0.515704
chr1	3816949	3816950	rs75689004	C	T	0.161	-1.41978	0.633118	-0.786666
chr1	3823803	3823804	rs76419011	C	T	0.169	-1.78261	-0.227992	-2.0106
chr1	3827480	3827481	rs61770379	C	T	0.3072	0.697374	-0.507552	0.189822
chr1	4008568	4008569	rs79279812	C	T	0.1362	-0.900384	-0.727048	-1.62743
chr1	4013996	4013997	rs10915431	C	T	0.0646	-0.859579	-0.535301	-1.39488
chr1	4038358	4038359	rs72644269	C	T	0.0537	-0.709455	-0.6863	-1.39576
chr1	4068212	4068213	rs6426431	G	A	0.4911	0.728085	-0.997005	-0.26892
chr1	4068244	4068245	rs12744667	G	A	0.3221	-0.81696	0.482516	-0.334444
chr1	4092941	4092942	rs78561413	G	A	0.0139	-1.76548	0.980885	-0.784591
chr1	4092986	4092987	rs78036575	G	T	0.0129	-1.06069	0.349781	-0.710912
chr1	4094429	4094430	rs78425991	T	C	0.0139	0.619172	-1.12409	-0.504921
chr1	4095607	4095608	rs4361965	G	A	0.1769	0.674071	-0.862151	-0.188079
chr1	4121383	4121384	rs7524590	A	G	0.8479	0.607486	-0.688434	-0.0809471
chr1	4122707	4122708	rs112970017	C	T	0.0139	-0.851236	-0.311472	-1.16271
chr1	4155457	4155458	rs532951496	G	A	0.2763	-0.800129	-0.0108166	-0.810946
chr1	4155840	4155841	rs56329102	A	G	0.2763	-0.749953	0.864774	0.114821
chr1	4168696	4168697	rs78714318	G	T	0.0467	-0.689198	-0.841814	-1.53101
chr1	4187641	4187642	rs12087859	C	T	0.1014	-1.31604	-0.284	-1.60004
chr1	4232516	4232517	rs12405392	C	T	0.339	0.817196	-1.53789	-0.720697
chr1	4232720	4232721	rs74808532	G	A	0.0616	-0.766559	-0.668297	-1.43486
chr1	4232980	4232981	rs12130304	A	T	0.0795	-0.80915	0.134451	-0.674699
chr1	4283857	4283858	rs870143	C	A	0.2545	-0.93197	-0.950404	-1.88237
chr1	4288493	4288494	rs56149320	C	T	0.1342	-0.697027	0.909477	0.21245
chr1	4351763	4351764	rs7522770	A	G	0.0606	0.830607	-1.57199	-0.741381
chr1	4357459	4357460	rs75163403	G	A	0.0169	-1.49265	-0.871228	-2.36387
chr1	4362929	4362930	rs630615	C	A	0.3201	-0.720473	-0.291148	-1.01162
chr1	4363186	4363187	rs200400406	GCATTCCATTC	G	0.2813	-0.757884	0.684806	-0.0730781
chr1	4363324	4363325	rs71640919	T	C	0.2227	-0.611941	0.789273	0.177332
chr1	4363334	4363335	rs34211962	T	C	0.0755	-0.611941	0.789273	0.177332
chr1	4367172	4367173	rs116019360	A	G	0.0557	1.02023	-0.250668	0.769566
chr1	4368270	4368271	rs10915508	G	A	0.2495	-0.920602	-0.911908	-1.83251
chr1	4440512	4440513	rs590798	A	C	0.9076	1.11069	-1.01166	0.099033
chr1	4472375	4472376	rs114060995	T	A	0.0199	0.859724	-1.74666	-0.886934
chr1	4476280	4476281	rs72632764	C	T	0.0875	1.02679	-0.0293542	0.99744
chr1	4523441	4523442	rs688029	T	C	0.3469	-0.961708	-0.760066	-1.72177
chr1	4529543	4529544	rs10915545	C	T	0.2793	-0.735356	-0.827581	-1.56294
chr1	4548087	4548088	rs350181	G	A	0.1014	1.39956	-0.51641	0.883152
chr1	4575915	4575916	rs1399850	C	T	0.2893	0.891298	-0.323484	0.567814
chr1	4604656	4604657	rs114626239	G	C	0.0318	1.32347	-1.3747	-0.05123
chr1	4605187	4605188	rs72852759	A	T	0.1531	0.715658	-0.621298	0.0943597
chr1	4608203	4608204	rs241220	G	A	0.5815	0.677425	-0.0593405	0.618085
chr1	4620922	4620923	rs10915560	T	C	0.2495	-0.674246	0.588564	-0.0856822
chr1	4645724	4645725	rs7517269	A	G	0.1859	0.971009	-1.24972	-0.278714
chr1	4646072	4646073	rs561468	C	A	0.9423	-0.80476	-0.753447	-1.55821
chr1	4651229	4651230	rs164774	A	C,T	0.9423	-0.70718	-1.2036	-1.91078
chr1	4651346	4651347	rs1573749	G	A	0.1849	0.814376	-0.873081	-0.0587055
chr1	4663706	4663707	rs77923597	T	G	0.0119	-1.06816	0.338932	-0.729227
chr1	4676540	4676541	rs12401608	A	C	0.1093	-0.759689	-0.672984	-1.43267
chr1	4687258	4687259	rs149287860	C	T	0.0139	-0.655529	-0.0163538	-0.671883
chr1	4712987	4712988	rs55778567	C	T	0.167	-0.656791	0.173736	-0.483055
chr1	4738442	4738443	rs2071994	A	G	0.0308	0.612072	-0.781066	-0.168994
chr1	4738704	4738705	rs2071996	C	T	0.0855	0.655149	-0.62807	0.0270793
chr1	4738919	4738920	rs74697122	T	C	0.0308	-0.77176	0.191955	-0.579806
chr1	4750012	4750013	rs187148	C	G	0.5984	0.660993	-0.328176	0.332817
chr1	4771018	4771019	rs72638835	G	T	0.0149	-0.955319	-0.870191	-1.82551
chr1	4771453	4771454	rs115333233	C	T	0.0616	-0.773719	-0.0488744	-0.822593
chr1	4771694	4771695	rs989310	G	C	0.5487	-1.32009	0.435191	-0.884898
chr1	4794237	4794238	rs114657858	G	A	0.0219	-0.830562	-0.704546	-1.53511
chr1	4796571	4796572	rs141899425	C	T	0.0229	-0.603492	-0.0572638	-0.660756
chr1	4802297	4802298	rs78344694	C	T	0.0457	0.940803	-1.31868	-0.377879
chr1	4802331	4802332	rs61766963	C	G	0.0457	-0.862331	-0.210992	-1.07332
chr1	4814270	4814271	rs201437559	ATTCTAT	A	0.0179	-1.2605	-0.053816	-1.31431
chr1	4823138	4823139	rs111622387	C	T	0.0179	1.11025	-2.02793	-0.917677
chr1	4823200	4823201	rs2743978	G	A	0.7694	-1.12482	0.104161	-1.02066
chr1	4857176	4857177	rs6426435	C	T	0.0109	-1.60344	0.760161	-0.84328
chr1	4996320	4996321	rs72852925	G	A	0.0577	-0.599189	-0.920473	-1.51966
chr1	4999726	4999727	rs77575798	G	A	0.4274	-0.602424	0.165416	-0.437008
chr1	4999732	4999733	rs78194757	C	T	0.494	-0.668046	-0.0611476	-0.729194
chr1	4999754	4999755	rs78733790	C	T	0.4563	0.857992	-1.41354	-0.55555
chr1	5023320	5023321	rs12754637	G	A	0.2167	0.60723	-0.976373	-0.369143
chr1	5023429	5023430	rs6702660	A	G	0.7237	0.763263	-1.12983	-0.36657
chr1	5060674	5060675	rs540426638	C	T	0.0109	-0.622059	-0.0987287	-0.720788
chr1	5246550	5246551	rs80281729	C	A	0.0338	-0.668593	-0.144738	-0.813331
chr1	5246625	5246626	rs17366838	G	T	0.162	-0.63555	-0.0348737	-0.670423
chr1	5327651	5327652	rs2986190	C	G	0.7087	-0.71333	-0.163952	-0.877282
chr1	5333339	5333340	rs11808981	T	C	0.0726	0.714085	-0.362337	0.351748
chr1	5333478	5333479	rs598031	G	A	0.7107	-0.76365	0.588384	-0.175266
chr1	5334767	5334768	rs12746515	G	A	0.0855	0.716385	-0.575123	0.141262
chr1	5334890	5334891	rs12747870	C	T	0.0855	-0.686411	1.24026	0.553849
chr1	5334994	5334995	rs12746867	G	A	0.0855	0.832095	-1.30767	-0.475571
chr1	5408738	5408739	rs140176190	C	T	0.0626	0.725865	-1.74994	-1.02408
chr1	5408888	5408889	rs11587319	A	C	0.0626	-0.604031	-0.470921	-1.07495
chr1	5408947	5408948	rs11587325	A	T	0.0626	-0.593694	0.258729	-0.334965
chr1	5427250	5427251	rs141780001	A	C	0.0179	0.945524	-0.216911	0.728613
chr1	5427325	5427326	rs35566963	A	T	0.0567	0.59858	-0.963656	-0.365075
chr1	5453906	5453907	rs138036093	C	G	0.0149	-0.680488	-0.237941	-0.918429
chr1	5454065	5454066	rs149979461	G	A	0.0457	-1.19717	0.245833	-0.951333
chr1	5458870	5458871	rs36139907	G	T	0.3479	-0.880836	-0.116408	-0.997244
chr1	5475662	5475663	rs6603835	C	A	0.6143	-0.722075	-0.663476	-1.38555
chr1	5483684	5483685	rs6660455	G	C	0.4612	1.32482	-1.91387	-0.589051
chr1	5582287	5582288	rs77302624	G	A	0.0696	0.75404	-0.521898	0.232143
chr1	5597068	5597069	rs1342691	A	G	0.8549	-0.744915	-0.0306382	-0.775553
chr1	5597077	5597078	rs78629467	A	G	0.0696	1.01405	-0.72062	0.293427
chr1	5611539	5611540	rs2226157	C	G	0.4652	0.907921	-0.927041	-0.0191196
chr1	5611818	5611819	rs2211416	A	G	0.0686	-1.85935	1.04628	-0.813071
chr1	5612036	5612037	rs115235853	C	T	0.0239	-0.791928	0.0739468	-0.717981
chr1	5679368	5679369	rs1587407	A	G	0.7535	0.924504	-1.0803	-0.155798
chr1	5679402	5679403	rs74052688	C	T	0.0447	-0.771128	-0.499697	-1.27083
chr1	5682795	5682796	rs145649937	T	G	0.0129	1.39316	-1.01013	0.383033
chr1	5697713	5697714	rs148991489	C	T	0.0408	-0.659777	-0.612768	-1.27255
chr1	5716603	5716604	rs2488379	T	C	0.3628	-0.657744	-0.874914	-1.53266
chr1	5720960	5720961	rs1775410	C	T	0.0527	-0.788854	-0.123873	-0.912727
chr1	5724939	5724940	rs707580	T	C	0.2555	-0.730049	-0.745564	-1.47561
chr1	5728200	5728201	rs569761488	C	A	0.0557	1.71427	-2.22938	-0.515104
chr1	5728313	5728314	rs1628371	C	G	0.2296	-1.06234	0.322771	-0.739572
chr1	5728664	5728665	rs570149312	C	T	0.0268	0.744849	-0.913117	-0.168269
chr1	5731665	5731666	rs2649068	T	C	0.1193	0.799597	-0.587778	0.211819
chr1	5732249	5732250	rs7544257	A	G	0.0139	0.790372	-0.93044	-0.140068
chr1	5767685	5767686	rs770694	A	G	0.16	-0.66211	0.399306	-0.262804
chr1	5773641	5773642	rs770699	T	C	0.173	0.945484	-1.12367	-0.178187
chr1	5783131	5783132	rs74049435	T	C	0.0417	-0.631396	-0.928586	-1.55998
chr1	5788123	5788124	rs72643046	C	T	0.1183	1.89443	-0.208425	1.68601
chr1	5788581	5788582	rs4845815	C	T	0.0517	1.45329	-1.44174	0.0115523
chr1	5805855	5805856	rs11260684	C	G	0.0358	0.761063	-1.50715	-0.746086
chr1	5831711	5831712	rs4129515	T	C	0.1103	0.750826	-0.70322	0.0476059
chr1	5840029	5840030	rs6698924	A	C	0.0179	1.62691	-2.67297	-1.04606
chr1	5858299	5858300	rs7532629	A	C	0.9066	0.694882	-0.58694	0.107942
chr1	5858942	5858943	rs6687650	G	T	0.7614	-0.595275	-1.2582	-1.85347
chr1	5907567	5907568	rs2455772	G	C	0.6799	-1.00989	-0.383442	-1.39334
chr1	5910706	5910707	rs11803626	C	T	0.0119	-0.712465	0.311186	-0.401278
chr1	5911587	5911588	rs74051394	A	C	0.0964	-0.678591	-0.247123	-0.925714
chr1	5911665	5911666	rs12144662	T	C	0.0437	0.829596	-1.7173	-0.887704
chr1	5916627	5916628	rs12127179	C	T	0.0527	0.592114	-0.947663	-0.355549
chr1	5924517	5924518	rs115526767	G	A	0.0109	-1.02961	-0.124953	-1.15456
chr1	5942034	5942035	rs72630607	G	A	0.2177	-0.951738	0.123497	-0.828241
chr1	5949888	5949889	rs56143977	C	G	0.2167	0.765653	-0.655034	0.110618
chr1	5958408	5958409	rs11586334	T	C	0.159	0.650551	-1.19996	-0.549412
chr1	5965454	5965455	rs571655	C	T	0.0189	0.774869	0.132159	0.907028
chr1	5977981	5977982	rs7549818	A	G	0.8211	0.902402	-0.539517	0.362885
chr1	6038888	6038889	rs35766174	T	G	0.162	-0.923928	0.422604	-0.501324
chr1	6040395	6040396	rs79335185	C	G	0.0765	0.697522	-0.889001	-0.191479
chr1	6040424	6040425	rs34246301	C	T	0.0268	1.1207	-1.44057	-0.319862
chr1	6040474	6040475	rs540056950	G	GC	0.164	0.663612	-0.665009	-0.00139734
chr1	6040657	6040658	rs535711617	A	ACAGGGAGGGG	0.0109	0.710983	-0.26338	0.447603
chr1	6051811	6051812	rs181483849	A	C	0.0239	-0.698126	0.276478	-0.421647
chr1	6051922	6051923	rs11576872	G	C	0.162	0.769465	-0.400206	0.369259
chr1	6063044	6063045	rs201714518	T	TGAG	0.0308	-0.65085	0.0956406	-0.555209
chr1	6085352	6085353	rs1295106	T	G	0.9463	-0.722686	-0.255456	-0.978142
chr1	6094449	6094450	rs58801392	AG	A	0.2922	0.738047	-0.672621	0.0654264
chr1	6101770	6101771	rs1295086	C	T	0.0885	-0.707544	-1.48082	-2.18836
chr1	6108376	6108377	rs756096	C	A	0.1869	0.821264	-1.45159	-0.630322
chr1	6112785	6112786	rs12023920	T	G	0.2346	0.805007	-0.0586708	0.746336
chr1	6118692	6118693	rs11576563	C	T	0.0169	1.39493	-1.32724	0.06769
chr1	6125083	6125084	rs4908752	G	T	0.2316	-0.892063	-0.119182	-1.01125
chr1	6140553	6140554	rs11581252	G	A	0.2107	-0.605364	-0.887463	-1.49283
chr1	6147297	6147298	rs11583631	C	T	0.1421	-0.80882	0.828448	0.0196274
chr1	6147340	6147341	rs11584419	A	C	0.1431	0.777822	-1.78158	-1.00376
chr1	6158146	6158147	rs11586626	C	T	0.1392	-0.748586	-0.99982	-1.74841
chr1	6175416	6175417	rs114606171	C	T	0.0278	-0.655312	-0.589457	-1.24477
chr1	6175488	6175489	rs1883767	G	A	0.2614	-0.78772	-0.561909	-1.34963
chr1	6202091	6202092	rs147491256	C	T	0.0109	-0.743671	-0.254586	-0.998257
chr1	6208753	6208754	rs12129474	T	C	0.3052	0.735637	-1.61252	-0.876885
chr1	6243714	6243715	rs1534997	A	G	0.1183	-1.01782	0.144134	-0.873685
chr1	6243731	6243732	rs12143847	T	A	0.0636	0.651965	-0.0371098	0.614855
chr1	6243842	6243843	rs72853026	C	T	0.0636	1.12229	-0.376305	0.745989
chr1	6264774	6264775	rs12069441	T	C	0.2724	0.65354	-0.830302	-0.176761
chr1	6267310	6267311	rs12070308	C	T	0.0318	1.58345	-1.98805	-0.404596
chr1	6279117	6279118	rs2092412	T	C	0.0408	0.916057	-0.961962	-0.0459047
chr1	6282949	6282950	rs846110	T	G	0.0139	-0.615263	-0.474224	-1.08949
chr1	6296208	6296209	rs116431230	A	C	0.0865	-0.968361	0.413907	-0.554454
chr1	6296793	6296794	rs12082244	C	G	0.0318	-0.61256	-0.239422	-0.851982
chr1	6305291	6305292	rs61760836	C	A	0.6849	0.775443	-0.705861	0.0695814
chr1	6305302	6305303	rs61760837	C	A	0.6839	0.84758	-0.657416	0.190164
chr1	6323109	6323110	rs55980313	T	C	0.0209	-0.628642	-0.644196	-1.27284
chr1	6323419	6323420	rs57772795	G	A	0.0209	0.63656	-0.331145	0.305414
chr1	6337051	6337052	rs74049522	C	A	0.0298	0.795616	-0.895137	-0.0995204
chr1	6347339	6347340	rs6692407	G	A	0.0984	0.639695	-0.0798582	0.559837
chr1	6350584	6350585	rs58640499	C	T	0.0497	1.38282	-1.79854	-0.415716
chr1	6351522	6351523	rs77091008	G	A	0.0169	-0.630974	-0.30058	-0.931554
chr1	6360503	6360504	rs4908876	A	T	0.0845	-1.38562	0.898607	-0.487016
chr1	6367218	6367219	rs11121611	T	G	0.2068	-1.47284	0.133049	-1.33979
chr1	6367363	6367364	rs56961204	A	G	0.0517	0.669254	-0.667969	0.00128446
chr1	6368825	6368826	rs3789495	C	G	0.0517	-1.2046	-0.717982	-1.92258
chr1	6410410	6410411	rs75027779	C	T	0.0378	1.51335	-2.13097	-0.617613
chr1	6414536	6414537	rs2010905	A	T	0.0308	-0.789594	-0.240785	-1.03038
chr1	6446207	6446208	rs6687830	G	C	0.0885	0.946837	-0.811131	0.135706
chr1	6464807	6464808	rs12067222	A	C	0.0219	-0.760404	-0.725703	-1.48611
chr1	6483582	6483583	rs932402	G	A	0.0348	-0.75319	-0.213779	-0.96697
chr1	6484788	6484789	rs192381885	T	C,G	0.0507	0.698709	-0.160161	0.538548
chr1	6490436	6490437	rs111914711	G	C	0.0586	1.08501	-0.553407	0.531599
chr1	6497201	6497202	rs6577576	C	T	0.0855	-1.1395	0.981112	-0.158384
chr1	6505670	6505671	rs11121879	G	A	0.0467	0.982	-1.24704	-0.265036
chr1	6508121	6508122	rs11808508	G	C	0.0666	0.776477	-1.37571	-0.599237
chr1	6508871	6508872	rs138198721	C	T	0.0666	0.910394	-0.698477	0.211917
chr1	6520311	6520312	rs3138158	C	T	0.0934	1.04836	-0.582832	0.465533
chr1	6520667	6520668	rs41278010	A	C	0.0358	-0.621334	0.059464	-0.56187
chr1	6546686	6546687	rs61174940	G	A	0.0616	-0.945486	-0.174571	-1.12006
chr1	6546984	6546985	rs12565527	A	G	0.0616	0.690651	-1.64782	-0.957173
chr1	6550504	6550505	rs11806429	C	T	0.1083	0.898688	-1.22965	-0.33096
chr1	6579606	6579607	rs1556035	C	T	0.8797	0.932115	-1.16074	-0.228629
chr1	6607198	6607199	rs10746502	T	C	0.8638	0.908444	-1.12355	-0.21511
chr1	6607434	6607435	rs189015965	C	A	0.0139	0.635247	-1.67636	-1.04112
chr1	6607765	6607766	rs72634757	T	C	0.0119	0.630768	-0.981555	-0.350787
chr1	6657354	6657355	rs4587589	C	T	0.3529	0.613962	-0.977312	-0.36335
chr1	6657423	6657424	rs3866805	C	A	0.3678	0.861519	-0.490597	0.370922
chr1	6663553	6663554	rs2232453	C	T	0.3549	-0.911987	-0.32515	-1.23714
chr1	6672728	6672729	rs11583755	A	C	0.3738	-0.782	-0.214825	-0.996825
chr1	6683239	6683240	rs14057	G	A	0.338	0.644798	-1.10411	-0.459308
chr1	6685850	6685851	rs12127219	C	A	0.6938	-0.899661	0.303354	-0.596307
chr1	6694573	6694574	rs6804	G	A	0.33	-0.829893	-0.14063	-0.970523
chr1	6732567	6732568	rs3789572	G	T	0.3111	1.424	-1.13008	0.293929
chr1	6803746	6803747	rs12065191	T	C	0.2992	1.09679	-0.512141	0.58465
chr1	6860847	6860848	rs141395767	C	G	0.0159	-0.679122	-0.807829	-1.48695
chr1	6862303	6862304	rs200167833	C	T	0.0149	-0.755317	-0.0341674	-0.789484
chr1	6886307	6886308	rs17441375	A	C	0.1312	-0.587816	-0.827266	-1.41508
chr1	6920389	6920390	rs76259711	T	C	0.0139	-0.92645	0.0363207	-0.890129
chr1	6963268	6963269	rs77254260	C	A	0.1233	0.676169	-1.27441	-0.598243
chr1	6972392	6972393	rs11586867	C	T	0.5974	0.774466	-1.45594	-0.681478
chr1	7014868	7014869	rs34204447	C	G	0.0467	-1.1013	-0.385577	-1.48687
chr1	7022565	7022566	rs6681640	G	C	0.4215	-1.23427	0.036733	-1.19754
chr1	7062992	7062993	rs11120813	G	A	0.325	-0.598263	-0.132574	-0.730837
chr1	7072897	7072898	rs139665384	C	T	0.0119	1.04527	-0.625293	0.419974
chr1	7072944	7072945	rs11589210	C	T	0.0616	0.686275	-0.43686	0.249415
chr1	7074052	7074053	rs3810981	G	A	0.0477	0.601035	-1.03303	-0.431998
chr1	7078678	7078679	rs116747552	C	G	0.0139	-1.15893	-0.44076	-1.59969
chr1	7079062	7079063	rs6693691	T	C	0.5656	1.1006	-0.69125	0.409346
chr1	7079605	7079606	rs112665083	G	A	0.0179	1.15913	-1.60822	-0.449084
chr1	7079761	7079762	rs11809898	G	A	0.1471	-0.802093	-0.991756	-1.79385
chr1	7120630	7120631	rs72857534	C	T	0.0189	-1.35517	-0.72499	-2.08016
chr1	7156081	7156082	rs11120840	G	T	0.6312	-0.675595	0.0675566	-0.608038
chr1	7178130	7178131	rs9434846	A	G	0.3519	-1.09418	0.717086	-0.377096
chr1	7394817	7394818	rs6691196	C	G	0.1243	-0.697892	-0.534683	-1.23257
chr1	7406804	7406805	rs845243	C	T	0.6312	0.607039	-0.391334	0.215705
chr1	7426562	7426563	rs845269	A	G	0.7475	0.643602	-0.0771153	0.566487
chr1	7440993	7440994	rs74055403	C	G	0.0189	0.778949	-0.884654	-0.105706
chr1	7468613	7468614	rs763161	G	A	0.7614	-0.99689	0.144721	-0.852169
chr1	7479271	7479272	rs36040358	A	AG	0.9145	-0.699577	-0.544426	-1.244
chr1	7514588	7514589	rs1193245	C	T	0.2952	-1.56541	-0.736956	-2.30237
chr1	7517838	7517839	rs12743474	C	T	0.0169	-1.34787	0.625802	-0.722068
chr1	7517946	7517947	rs67725975	C	T	0.1163	0.645443	-1.61337	-0.967924
chr1	7545566	7545567	rs7552815	G	T	0.0159	-1.25005	0.885687	-0.364366
chr1	7550188	7550189	rs56096003	G	A	0.0149	0.643427	-0.500554	0.142873
chr1	7551454	7551455	rs7526892	G	A	0.1352	-0.862773	-0.0649727	-0.927746
chr1	7551883	7551884	rs78656731	T	C	0.0199	-0.703753	0.327663	-0.37609
chr1	7569411	7569412	rs1212726	T	C	0.8171	-0.588717	0.151391	-0.437326
chr1	7577680	7577681	rs1969473	G	C	0.1113	0.646105	-1.43588	-0.789778
chr1	7587625	7587626	rs1725227	G	C	0.7545	0.670815	-1.3931	-0.722288
chr1	7588899	7588900	rs552468493	G	T	0.1799	-0.815042	-0.634491	-1.44953
chr1	7603449	7603450	rs1750823	T	C	0.7187	-1.51873	-0.115271	-1.63401
chr1	7604830	7604831	rs1750822	G	A	0.668	0.660762	-1.6114	-0.95064
chr1	7609214	7609215	rs60870420	G	A	0.0258	-0.601856	-0.665065	-1.26692
chr1	7612592	7612593	rs12742992	C	T	0.4006	0.763992	-0.116219	0.647772
chr1	7681742	7681743	rs7555394	G	A	0.1332	0.959213	-1.13783	-0.178615
chr1	7698517	7698518	rs111284644	T	G	0.0119	0.677381	-1.47263	-0.795249
chr1	7721950	7721951	rs112532394	C	T	0.0109	-1.55723	-0.308999	-1.86623
chr1	7722068	7722069	rs111415903	G	A	0.0109	0.727098	-0.966057	-0.23896
chr1	7730533	7730534	rs77634365	T	C	0.0199	-0.680134	-0.0640688	-0.744203
chr1	7730878	7730879	rs72853807	C	T	0.0537	0.766424	-1.9493	-1.18288
chr1	7740874	7740875	rs569111506	G	T	0.0139	-1.01097	-0.386484	-1.39745
chr1	7770900	7770901	rs2995034	C	T	0.4513	1.03162	0.0639565	1.09558
chr1	7779956	7779957	rs4908685	C	A	0.0447	-0.80696	0.696899	-0.110061
chr1	7798904	7798905	rs147570843	TA	T	0.1183	-1.85088	2.78748	0.936605
chr1	7831312	7831313	rs544911502	T	C	0.0646	-0.663297	-0.312051	-0.975348
chr1	7843709	7843710	rs571577	A	C	0.9145	1.00954	-0.862399	0.147138
chr1	7887247	7887248	rs2859387	G	A	0.3718	0.674366	-0.149216	0.52515
chr1	7887578	7887579	rs228697	C	G	0.0964	1.21521	-1.68884	-0.473631
chr1	7907983	7907984	rs4908485	A	G	0.1551	-0.978474	-0.507527	-1.486
chr1	7922260	7922261	rs1776356	C	A	0.6978	-1.38479	-0.973369	-2.35816
chr1	8003008	8003009	rs17229038	C	T	0.0278	-0.839346	0.116622	-0.722724
chr1	8003063	8003064	rs10864320	G	A	0.0159	-0.788724	-0.383351	-1.17207
chr1	8011799	8011800	rs12022570	G	C	0.0149	0.592189	-0.498727	0.0934624
chr1	8014438	8014439	rs151329319	G	A	0.0159	-0.63148	-0.715119	-1.3466
chr1	8021909	8021910	rs200968609	GGTGCTGGACGGTGTCCCT	G	0.165	-0.665857	-0.675485	-1.34134
chr1	8022170	8022171	rs226250	C	T	0.4274	-0.700313	-0.21646	-0.916773
chr1	8164455	8164456	rs10864328	G	C	0.3628	-1.21874	0.262482	-0.956256
chr1	8164652	8164653	rs139980119	TG	T	0.4672	-0.631123	-0.760046	-1.39117
chr1	8187299	8187300	rs4908737	T	A	0.6879	-0.827178	-0.728295	-1.55547
chr1	8225795	8225796	rs897447	G	A	0.7396	0.589063	-1.14712	-0.558061
chr1	8250206	8250207	rs79826603	A	C	0.0209	-0.631762	-1.14125	-1.77301
chr1	8263107	8263108	rs77905678	C	T	0.0119	-0.663807	-0.48685	-1.15066
chr1	8264283	8264284	rs61264263	G	T	0.0457	1.09771	-1.54745	-0.44974
chr1	8274764	8274765	rs411129	G	T	0.0626	-1.07921	0.11155	-0.967663
chr1	8274770	8274771	rs385814	T	C	0.0626	-0.596741	0.264856	-0.331885
chr1	8275041	8275042	rs113677773	T	TGGG	0.0636	-1.51897	0.297674	-1.22129
chr1	8284861	8284862	rs371782	A	G	0.9105	-0.88668	-0.0917029	-0.978383
chr1	8310061	8310062	rs11583166	G	A	0.1243	-0.815855	-0.255696	-1.07155
chr1	8310157	8310158	rs72861200	C	G	0.0408	0.838847	-1.54428	-0.705429
chr1	8320044	8320045	rs389709	G	A	0.8111	-0.710359	-0.2857	-0.996059
chr1	8342292	8342293	rs159629	T	C	0.9354	0.844127	-0.694318	0.149809
chr1	8375332	8375333	rs6689410	T	C	0.7783	-0.675553	0.144429	-0.531124
chr1	8383986	8383987	rs72635796	G	C	0.1819	1.35193	-0.650319	0.701614
chr1	8392445	8392446	rs11585385	T	G	0.2823	1.01363	-0.887245	0.126389
chr1	8402593	8402594	rs72636904	T	C	0.0249	-0.657367	-0.547216	-1.20458
chr1	8403392	8403393	rs79500154	G	A	0.0159	0.641942	-0.17338	0.468562
chr1	8413316	8413317	rs1058791	A	C	0.1899	0.768809	-0.40998	0.358829
chr1	8423876	8423877	rs2289732	G	C	0.1968	-1.10323	0.382579	-0.720648
chr1	8424028	8424029	rs12118524	G	A	0.0328	1.17216	0.0591339	1.2313
chr1	8455711	8455712	rs11121179	G	T	0.1948	-1.16616	-0.064148	-1.23031
chr1	8468277	8468278	rs301792	A	G	0.3091	-0.614622	-0.197502	-0.812125
chr1	8472163	8472164	rs301788	C	T	0.8042	-0.653676	-0.101932	-0.755608
chr1	8482031	8482032	rs12095124	T	C	0.2147	-0.746935	-1.00254	-1.74947
chr1	8484822	8484823	rs301807	A	G	0.5278	1.27211	-1.12934	0.14277
chr1	8503934	8503935	rs145986089	TGGCAGCCTCTGCCAA	T	0.2147	-2.64832	1.65322	-0.995109
chr1	8510594	8510595	rs301813	T	C	0.8032	0.718932	-1.19303	-0.474096
chr1	8516393	8516394	rs200237252	GTACAC	G	0.0219	0.644278	-1.47704	-0.832764
chr1	8570455	8570456	rs2024774	C	G	0.2157	-0.655196	0.0552191	-0.599977
chr1	8571708	8571709	rs13374834	A	G	0.0298	1.95321	-0.567823	1.38539
chr1	8651195	8651196	rs17386539	G	A	0.0149	-1.16096	0.510244	-0.650717
chr1	8658084	8658085	rs11121205	G	A	0.5885	-0.833887	-0.492681	-1.32657
chr1	8699468	8699469	rs146526624	T	G	0.0119	-1.00956	0.0026613	-1.0069
chr1	8720824	8720825	rs17387017	T	C	0.0149	0.697663	-0.893974	-0.19631
chr1	8724521	8724522	rs10864360	C	T	0.5676	0.778446	-1.09421	-0.315767
chr1	8762356	8762357	rs7554486	G	A	0.5825	0.626839	-1.15476	-0.527916
chr1	8767310	8767311	rs10864363	T	G	0.2594	-0.732657	0.423078	-0.309578
chr1	8813242	8813243	rs7533113	C	T	0.8171	0.887291	-0.379574	0.507717
chr1	8878808	8878809	rs12410886	A	C	0.2753	0.603382	-1.17092	-0.567537
chr1	8889347	8889348	rs2131677	C	A	0.8151	-0.631324	-0.269782	-0.901106
chr1	8966337	8966338	rs4908792	A	T	0.3091	0.803228	-1.00699	-0.203758
chr1	8971413	8971414	rs142610569	G	A	0.0109	-0.733281	-0.765785	-1.49907
chr1	8977903	8977904	rs201856509	TG	T	0.0268	1.28438	-2.29642	-1.01205
chr1	8978645	8978646	rs6668426	T	G	0.6252	-0.784264	-0.818182	-1.60245
chr1	8998058	8998059	rs914997	C	T	0.8439	-0.588462	-0.462581	-1.05104
chr1	8998366	8998367	rs914995	C	G	0.8439	-0.837648	0.217385	-0.620263
chr1	9001766	9001767	rs12068037	C	T	0.0676	1.20366	-1.81637	-0.612716
chr1	9001960	9001961	rs12568902	T	A	0.8668	0.642149	-0.771545	-0.129396
chr1	9003736	9003737	rs112888980	C	CCCTTTCCTTCCT	0.7187	1.63712	-1.5499	0.0872203
chr1	9016006	9016007	rs6661729	C	A,T	0.0557	0.671697	-0.195287	0.476411
chr1	9046642	9046643	rs7529173	A	T	0.335	-1.02751	-0.105668	-1.13318
chr1	9065118	9065119	rs60512841	A	C	0.0974	1.37156	-0.712287	0.659275
chr1	9070183	9070184	rs79843700	C	T	0.0308	-0.974936	0.540937	-0.434
chr1	9071124	9071125	rs11121294	C	T	0.3678	-1.28944	0.847985	-0.441458
chr1	9118595	9118596	rs12145292	C	A	0.2525	-0.603746	-0.36395	-0.967696
chr1	9125397	9125398	rs72632934	G	A	0.0467	-0.902521	0.385158	-0.517364
chr1	9127370	9127371	rs2505974	T	C	0.0487	-0.803544	-0.151664	-0.955208
chr1	9127457	9127458	rs3765962	T	A	0.3022	-0.6661	0.616106	-0.0499942
chr1	9140060	9140061	rs6673259	T	C	0.0507	-0.588209	-1.14908	-1.73729
chr1	9145043	9145044	rs76839349	G	A	0.0129	-0.601655	-0.932291	-1.53395
chr1	9159713	9159714	rs143925765	G	GGCCAGTGCAGATCTGCAAGTCAC,GGCCAGTGCAGATCTGCAAGTCAT	0.5169	0.668149	-1.17192	-0.503771
chr1	9161549	9161550	rs1061907	G	A	0.5358	0.681231	-0.540758	0.140473
chr1	9161667	9161668	rs6661122	T	C	0.5358	0.70055	-1.69391	-0.993358
chr1	9170877	9170878	rs770028	G	A	0.1372	-0.985006	0.0655414	-0.919464
chr1	9181978	9181979	rs6577551	C	G	0.673	-0.674538	-0.384508	-1.05905
chr1	9182140	9182141	rs12144117	C	T	0.2117	-0.893684	-0.872488	-1.76617
chr1	9188143	9188144	rs76301303	C	G	0.0288	0.88183	-0.718847	0.162983
chr1	9209957	9209958	rs4281343	G	A	0.327	0.673253	-0.120604	0.552648
chr1	9214275	9214276	rs150108739	A	AGGGAGGGCAAAGGTCAGTGGGGATGGT	0.7455	-1.17596	1.23396	0.0580064
chr1	9256358	9256359	rs4908824	C	A	0.3579	0.839312	-1.78615	-0.946842
chr1	9293155	9293156	rs11801562	G	A	0.1521	0.756152	0.209573	0.965725
chr1	9293519	9293520	rs181782240	C	G	0.0119	-0.837346	-0.490203	-1.32755
chr1	9300567	9300568	rs1294011	G	T	0.0239	0.825119	-0.588878	0.236241
chr1	9302314	9302315	rs2268171	C	T	0.1461	-0.619788	-1.14513	-1.76492
chr1	9302842	9302843	rs75213162	C	T	0.0149	-1.66469	1.93984	0.275153
chr1	9304730	9304731	rs2239560	G	A	0.1501	0.833067	-0.782264	0.0508038
chr1	9310039	9310040	rs763180	G	A	0.3907	-1.14545	0.2642	-0.881248
chr1	9323456	9323457	rs731183	G	C	0.0875	1.131	-1.77513	-0.644128
chr1	9327176	9327177	rs72641817	C	T	0.1441	-0.875898	0.60669	-0.269209
chr1	9335326	9335327	rs12121476	C	G	0.2654	0.654436	-1.2559	-0.601467
chr1	9335744	9335745	rs6688233	C	T	0.2624	-1.33237	1.2321	-0.100269
chr1	9349423	9349424	rs9725983	A	G	0.4155	0.737275	-1.16019	-0.422916
chr1	9352233	9352234	rs75573311	G	A	0.0408	-0.698727	0.0343904	-0.664336
chr1	9355044	9355045	rs61783472	C	T	0.2346	-0.698921	-0.583851	-1.28277
chr1	9363090	9363091	rs57156794	C	T	0.1282	0.882698	-0.199082	0.683615
chr1	9378298	9378299	rs72642739	C	G	0.0487	-0.680581	0.392166	-0.288414
chr1	9378577	9378578	rs4908530	C	T	0.6829	0.700756	-1.8764	-1.17565
chr1	9381728	9381729	rs11584306	T	A	0.2068	0.739471	-0.641118	0.0983525
chr1	9393081	9393082	rs1294022	C	G	0.1223	1.08714	-0.702789	0.384355
chr1	9398987	9398988	rs72643833	G	T	0.0249	0.778323	-0.739395	0.0389282
chr1	9432123	9432124	rs58928993	G	A	0.1551	0.749133	-0.0994017	0.649731
chr1	9449308	9449309	rs115169121	A	C	0.4006	0.862137	-0.699569	0.162568
chr1	9462811	9462812	rs7528785	G	C	0.3877	0.717045	-1.42946	-0.712413
chr1	9464797	9464798	rs11121405	A	T	0.5229	1.1367	-1.20126	-0.0645597
chr1	9465074	9465075	rs7416550	C	T	0.4443	0.97184	-0.912355	0.0594854
chr1	9489211	9489212	rs11121411	G	A	0.5447	0.649719	-0.473862	0.175857
chr1	9501491	9501492	rs9662546	G	A	0.0905	1.25103	-1.52715	-0.276128
chr1	9509820	9509821	rs10779726	G	C	0.836	0.886233	-0.750377	0.135856
chr1	9525763	9525764	rs12042017	G	T	0.2068	-0.62284	0.512778	-0.110062
chr1	9532962	9532963	rs74349986	C	T	0.0348	-1.1738	-0.471767	-1.64557
chr1	9533237	9533238	rs6679380	C	T	0.7664	-0.875966	-0.0965657	-0.972532
chr1	9533444	9533445	rs113474593	G	T	0.0268	-0.729036	0.0997829	-0.629253
chr1	9599647	9599648	rs112358601	C	T	0.172	1.3343	-1.83896	-0.504658
chr1	9615367	9615368	rs145126951	G	A	0.0239	0.803197	-1.93773	-1.13453
chr1	9633722	9633723	rs6540953	A	G	0.9761	1.4569	-1.70051	-0.243601
chr1	9664649	9664650	rs138697503	T	A	0.0219	1.04937	-0.962039	0.0873286
chr1	9708670	9708671	rs61783014	C	T	0.0805	0.851131	-0.591076	0.260056
chr1	9711759	9711760	rs11806839	G	C	0.4095	0.632692	-0.810139	-0.177447
chr1	9712005	9712006	rs78800005	C	T	0.1978	-1.00437	-0.224288	-1.22866
chr1	9747742	9747743	rs74338407	C	T	0.0497	1.50153	-2.47363	-0.972102
chr1	9749934	9749935	rs9430648	T	G	0.4851	0.829746	-2.48495	-1.6552
chr1	9754183	9754184	rs114361133	C	T	0.0149	0.626641	-0.742463	-0.115822
chr1	9762557	9762558	rs541015966	CTTTTTTTTTTTTTTTTTTTTT	C	0.4026	0.726426	-0.469507	0.256919
chr1	9791760	9791761	rs563222999	T	G	0.0507	0.714407	-0.971407	-0.257
chr1	9852582	9852583	rs72633887	T	C	0.0378	0.732691	-0.664956	0.0677353
chr1	9887627	9887628	rs6699320	T	C	0.0706	0.624435	-0.303387	0.321048
chr1	9896496	9896497	rs72855780	C	T	0.0726	-0.677487	-0.983521	-1.66101
chr1	9902899	9902900	rs10864439	T	G	0.2495	-0.762308	0.130826	-0.631482
chr1	9903547	9903548	rs12725898	G	T	0.4751	-0.859936	-0.310259	-1.17019
chr1	9919520	9919521	rs6663110	C	T	0.0219	1.04242	0.120929	1.16335
chr1	9926251	9926252	rs144524032	G	C	0.0119	0.588083	-0.154707	0.433376
chr1	9989080	9989081	rs72858090	G	A	0.0417	0.882681	-0.734731	0.14795
chr1	9989576	9989577	rs186441781	C	T	0.0209	1.04547	-1.38404	-0.33857
chr1	10003319	10003320	rs1234694	G	A	0.826	-0.749616	-0.274435	-1.02405
chr1	10010343	10010344	rs41280780	T	G	0.0875	0.749885	-0.610761	0.139123
chr1	10051164	10051165	rs35232720	C	T	0.0666	-1.05667	0.142157	-0.914511
chr1	10057705	10057706	rs11121513	G	A	0.1004	-0.743713	-0.535623	-1.27934
chr1	10067228	10067229	rs151287323	C	A	0.0249	0.749135	-1.01746	-0.268325
chr1	10093370	10093371	rs141301368	C	T	0.0229	-0.58916	0.135729	-0.453432
chr1	10093456	10093457	rs7528979	C	T	0.1769	0.730264	-0.864585	-0.134321
chr1	10106175	10106176	rs141685825	A	G	0.0229	-0.818806	0.294066	-0.52474
chr1	10112152	10112153	rs61782895	C	A	0.0129	0.745457	-1.86795	-1.12249
chr1	10193111	10193112	rs562566037	GAAGGGGGCAGCCAGGAACAGACCC	G	0.0179	-0.861632	0.725476	-0.136156
chr1	10193139	10193140	rs573255832	G	A	0.0149	0.740028	-0.492346	0.247682
chr1	10211821	10211822	rs78193965	T	G	0.0219	-1.13061	0.283872	-0.846737
chr1	10212038	10212039	rs75509194	G	T	0.0219	-0.633612	-0.685627	-1.31924
chr1	10213166	10213167	rs75471522	T	G	0.0219	0.636546	-0.470793	0.165752
chr1	10213286	10213287	rs77353882	G	C	0.0219	-0.815499	-0.365667	-1.18117
chr1	10213511	10213512	rs116708561	C	T	0.0219	0.894542	-0.107422	0.78712
chr1	10215290	10215291	rs76119640	C	G	0.0149	1.06078	-0.593168	0.46761
chr1	10241586	10241587	rs4846195	C	T	0.0746	-0.969833	-0.262738	-1.23257
chr1	10264436	10264437	rs114394771	A	G	0.0199	-0.845253	0.336651	-0.508602
chr1	10271627	10271628	rs79794661	G	C	0.0219	-1.27978	0.431706	-0.848077
chr1	10302864	10302865	rs115767228	G	A	0.0239	-1.06018	-0.544967	-1.60515
chr1	10317878	10317879	rs12136404	A	G	0.4841	0.652078	-1.26293	-0.610855
chr1	10346202	10346203	rs4845932	C	T	0.3569	-0.77694	-0.555407	-1.33235
chr1	10346210	10346211	rs4845933	C	A	0.3052	1.5023	-1.13154	0.370765
chr1	10368281	10368282	rs141229777	G	C	0.0229	0.61852	-1.45215	-0.833631
chr1	10428569	10428570	rs77172218	G	A	0.0159	1.01657	-1.45707	-0.440502
chr1	10437391	10437392	rs552949106	C	G	0.0318	-0.979131	0.0758945	-0.903236
chr1	10448259	10448260	rs11121557	T	G	0.4861	1.18943	-1.05852	0.130916
chr1	10484273	10484274	rs139933641	C	T	0.0149	-0.917207	-0.154474	-1.07168
chr1	10484415	10484416	rs663364	T	G	0.5249	0.764421	-0.863296	-0.0988748
chr1	10488313	10488314	rs505141	A	G	0.492	-0.746367	-0.179455	-0.925822
chr1	10489948	10489949	rs147415571	G	A	0.0328	0.924558	-1.69708	-0.772522
chr1	10490110	10490111	rs649101	T	C	0.492	0.608618	-1.27348	-0.664863
chr1	10490538	10490539	rs661256	G	C	0.0696	0.674605	-1.14277	-0.468163
chr1	10554793	10554794	rs620405	T	C	0.7087	1.02134	-1.43567	-0.414328
chr1	10567710	10567711	rs589151	C	T	0.5109	-0.911467	-0.49647	-1.40794
chr1	10654687	10654688	rs1471642	T	C	0.2207	0.829412	-0.629884	0.199527
chr1	10687725	10687726	rs185864	G	C	0.1521	-0.692823	0.929343	0.23652
chr1	10714293	10714294	rs56322140	G	C	0.0457	-1.00721	-0.193953	-1.20116
chr1	10724420	10724421	rs72858535	C	T	0.0199	-0.912607	-0.734805	-1.64741
chr1	10728546	10728547	rs115689695	C	T	0.0348	-0.958079	-1.0478	-2.00588
chr1	10731928	10731929	rs77302518	G	A	0.0338	1.12466	-1.1051	0.0195578
chr1	10732265	10732266	rs188493533	C	G	0.0368	-0.832957	-0.215089	-1.04805
chr1	10737561	10737562	rs284310	C	T	0.4622	-0.607902	-0.278998	-0.8869
chr1	10748149	10748150	rs115542569	G	A	0.0179	-1.37285	-0.0118464	-1.38469
chr1	10777781	10777782	rs166911	G	A	0.0746	0.758719	-0.370819	0.3879
chr1	10795553	10795554	rs74052181	G	A	0.0179	-0.814014	0.0261154	-0.787898
chr1	10816216	10816217	rs6688219	C	T	0.0219	0.629601	-0.904554	-0.274953
chr1	10821481	10821482	rs148952952	G	T	0.0179	-1.16437	-0.038687	-1.20306
chr1	10822170	10822171	rs7512641	T	A	0.7187	-0.823872	-0.38214	-1.20601
chr1	10833231	10833232	rs58064215	C	G	0.7058	-1.03971	-0.479122	-1.51883
chr1	10833716	10833717	rs205476	G	A	0.7734	0.674092	-0.619309	0.0547828
chr1	10834420	10834421	rs74773993	G	C	0.0388	-1.00064	0.428858	-0.571783
chr1	10854072	10854073	rs12728592	C	A	0.0199	-1.4402	-0.05094	-1.49114
chr1	10869811	10869812	rs60065955	A	G	0.1799	-1.05117	-0.0056333	-1.0568
chr1	10880650	10880651	rs114724304	C	T	0.0159	-0.854328	-0.647398	-1.50173
chr1	10890703	10890704	rs1292656	C	T	0.5447	-1.45822	-0.324064	-1.78228
chr1	10894225	10894226	rs1292658	T	C	0.8857	0.789848	-1.8422	-1.05235
chr1	10895937	10895938	rs115990223	G	T	0.0318	1.1313	-1.68228	-0.550974
chr1	10911819	10911820	rs181016240	G	C	0.0119	-0.603561	-0.277704	-0.881265
chr1	10911824	10911825	rs71645070	T	A	0.16	-0.651965	0.425353	-0.226612
chr1	10915993	10915994	rs72643281	G	A	0.0368	0.739301	-0.818428	-0.079127
chr1	10917961	10917962	rs61777380	G	C	0.2117	-0.794483	0.00126974	-0.793213
chr1	10920744	10920745	rs552630	C	A	0.7505	-0.685453	-0.984787	-1.67024
chr1	10986307	10986308	rs12748162	C	A	0.2565	1.13639	-1.41243	-0.276039
chr1	10986587	10986588	rs35995177	T	A	0.4185	-0.712887	-0.343123	-1.05601
chr1	11010852	11010853	rs1281009	G	A	0.0427	0.588531	-0.051246	0.537285
chr1	11017608	11017609	rs7511959	T	C	0.2127	0.589585	-1.02231	-0.432725
chr1	11017616	11017617	rs34691090	G	C	0.2107	0.651616	-1.00035	-0.348738
chr1	11021063	11021064	rs4282824	C	T	0.2465	-1.15999	-0.788465	-1.94845
chr1	11033796	11033797	rs6675082	T	C	0.2306	-0.688496	-0.625296	-1.31379
chr1	11073322	11073323	rs61775597	A	C	0.173	1.23527	-1.63864	-0.403369
chr1	11112835	11112836	rs1884429	T	C	0.7734	-0.793799	0.592935	-0.200864
chr1	11115174	11115175	rs539233496	C	G	0.0696	0.659827	-1.21091	-0.551083
chr1	11127763	11127764	rs2261217	C	A	0.7416	-1.39632	-0.0585058	-1.45483
chr1	11132560	11132561	rs2791649	A	G	0.7416	-1.19611	-0.319502	-1.51561
chr1	11136545	11136546	rs75232193	C	T	0.0288	0.738428	-1.17998	-0.441552
chr1	11194873	11194874	rs77086655	G	A	0.0477	0.6686	-0.726572	-0.0579715
chr1	11195248	11195249	rs12116962	G	A	0.0258	-0.926615	-0.927019	-1.85363
chr1	11195282	11195283	rs12124629	C	G	0.0249	-1.14935	-0.716255	-1.86561
chr1	11234809	11234810	rs72871483	G	A	0.0249	0.773059	-0.785753	-0.0126936
chr1	11236523	11236524	rs12041740	G	A	0.7356	-0.692146	-0.341412	-1.03356
chr1	11301956	11301957	rs78975320	T	C	0.0557	0.731876	-1.07178	-0.339909
chr1	11322564	11322565	rs2295079	C	G	0.6899	0.911309	-1.25477	-0.343458
chr1	11322627	11322628	rs2295080	G	T	0.6889	-0.687266	-0.117606	-0.804872
chr1	11397851	11397852	rs12060190	G	A	0.0497	-0.916043	0.00125189	-0.914791
chr1	11424108	11424109	rs2788574	G	A	0.4115	-0.687268	-0.149821	-0.837089
chr1	11519272	11519273	rs12141532	A	G	0.0209	0.750381	-0.996964	-0.246583
chr1	11558200	11558201	rs7537387	G	C	0.1302	0.724735	-0.426552	0.298184
chr1	11655409	11655410	rs4525043	A	C	0.173	0.598719	-0.732536	-0.133816
chr1	11655441	11655442	rs4356057	G	A	0.172	-0.667728	-0.52996	-1.19769
chr1	11672088	11672089	rs72636881	C	T	0.0994	-0.717369	-0.952463	-1.66983
chr1	11672500	11672501	rs6704310	T	C	0.8062	0.757514	-1.37389	-0.616374
chr1	11680660	11680661	rs149465015	G	A	0.0249	-0.707454	-0.677202	-1.38466
chr1	11695967	11695968	rs4261122	A	G	0.8569	0.880447	-1.27408	-0.393637
chr1	11724707	11724708	rs55706902	T	C	0.1779	-0.736798	0.0951659	-0.641633
chr1	11725205	11725206	rs3117064	T	A	0.4692	-0.853673	-0.654171	-1.50784
chr1	11740811	11740812	rs2272981	A	C	0.1879	0.648998	-0.426329	0.222669
chr1	11741795	11741796	rs2233006	T	A	0.3757	-1.30252	0.461055	-0.841468
chr1	11751134	11751135	rs12088541	C	T	0.0915	0.830848	-0.706357	0.124491
chr1	11761467	11761468	rs1534990	A	C	0.7276	0.637434	-1.05418	-0.416751
chr1	11761943	11761944	rs1555078	C	T	0.0964	-0.679976	-0.778419	-1.4584
chr1	11767937	11767938	rs12134785	T	C	0.0974	-1.2479	0.810284	-0.437616
chr1	11768868	11768869	rs6687381	A	C	0.6243	-0.714382	-0.150023	-0.864405
chr1	11790449	11790450	rs34860946	T	C	0.325	1.61618	-2.27032	-0.654143
chr1	11796239	11796240	rs6668392	C	T	0.0338	-0.653742	-1.09919	-1.75294
chr1	11809414	11809415	rs17875991	C	T	0.0169	-0.813688	0.651283	-0.162405
chr1	11809692	11809693	rs17875957	C	G	0.0109	1.03064	-1.57468	-0.544041
chr1	11831594	11831595	rs55990971	G	A	0.0646	-0.678942	-0.0456351	-0.724577
chr1	11831874	11831875	rs55929441	A	G	0.1014	0.721	-1.79414	-1.07314
chr1	11832622	11832623	rs77157935	C	G	0.0646	0.780377	-1.30589	-0.52551
chr1	11832658	11832659	rs61773953	A	G	0.1809	0.860994	-1.04189	-0.180894
chr1	11845166	11845167	rs199890035	TTTA	T	0.1024	0.807237	-0.479643	0.327594
chr1	11848067	11848068	rs1537514	G	C	0.1024	-0.589391	-0.629843	-1.21923
chr1	11857925	11857926	rs45608437	G	A	0.1799	-0.727637	-0.507396	-1.23503
chr1	11858035	11858036	rs17037388	A	G	0.1441	-0.754291	0.128215	-0.626076
chr1	11858323	11858324	rs17421560	G	A	0.1024	0.62502	-0.662221	-0.0372012
chr1	11865816	11865817	rs45594036	C	A	0.0408	-0.958464	-0.689694	-1.64816
chr1	11866183	11866184	rs45460391	C	G	0.0119	-0.727708	-0.214052	-0.941759
chr1	11881726	11881727	rs75747410	G	A	0.0338	-0.621356	-0.0574957	-0.678852
chr1	11881946	11881947	rs113289271	C	CAG	0.1402	0.6587	-0.392548	0.266152
chr1	11905994	11905995	rs5066	C	A	0.0467	0.963742	-1.50587	-0.54213
chr1	11906067	11906068	rs5065	A	G	0.1233	-0.623907	0.0290528	-0.594854
chr1	11908504	11908505	rs13305986	G	C	0.0159	-0.793684	-0.157726	-0.95141
chr1	11911234	11911235	rs201549734	AC	A	0.0159	0.602403	-1.48201	-0.879607
chr1	11919270	11919271	rs198389	A	G	0.4135	0.631868	-1.29694	-0.66507
chr1	11932677	11932678	rs34593006	G	A	0.3588	0.85511	-0.466631	0.388479
chr1	11934475	11934476	rs34293975	G	T	0.0477	-0.728495	0.641246	-0.0872495
chr1	11941483	11941484	rs2336395	G	T	0.162	-0.591826	-0.477645	-1.06947
chr1	11942818	11942819	rs12724385	T	C	0.0358	-0.90189	0.589162	-0.312728
chr1	11946455	11946456	rs2050270	G	A	0.3648	-0.744937	-0.61921	-1.36415
chr1	11946572	11946573	rs2050267	G	A	0.3658	1.41294	-1.75158	-0.338639
chr1	11947628	11947629	rs1474576	T	C	0.3439	0.667133	-0.744815	-0.077682
chr1	11954344	11954345	rs541373515	T	TAAAGTTGCAGCTGGA	0.0775	1.10301	-1.32402	-0.221013
chr1	11959237	11959238	rs57044570	C	G	0.3429	1.48334	-2.31646	-0.833122
chr1	11968336	11968337	rs11121839	G	A,C	0.3449	-0.997302	-0.168278	-1.16558
chr1	11968347	11968348	rs75534118	A	G	0.1153	-0.872373	0.339122	-0.533251
chr1	11969916	11969917	rs926271	A	G	0.494	0.705734	-1.0506	-0.344863
chr1	11980448	11980449	rs17037529	T	C	0.1491	0.632274	-0.269658	0.362616
chr1	11995175	11995176	rs1208984	A	G	0.3917	0.816244	-0.360306	0.455938
chr1	11999123	11999124	rs7513651	C	T	0.0755	0.589056	-0.692265	-0.103209
chr1	11999555	11999556	rs6682230	G	A	0.0835	0.961591	-1.16268	-0.201093
chr1	12004150	12004151	rs12564031	G	A	0.0865	-0.674116	-0.706191	-1.38031
chr1	12004415	12004416	rs113232254	C	A	0.0109	-0.905482	-0.742922	-1.6484
chr1	12009457	12009458	rs77138768	A	C	0.0746	-1.10754	-1.31865	-2.42619
chr1	12013199	12013200	rs113868586	C	T	0.0606	0.826685	-1.25954	-0.432854
chr1	12062360	12062361	rs2236058	C	G	0.6143	0.90315	-1.63958	-0.736426
chr1	12074526	12074527	rs59658986	T	C	0.0845	0.66314	-1.2107	-0.54756
chr1	12080121	12080122	rs74052928	G	C	0.1412	0.642447	-2.11656	-1.47411
chr1	12100941	12100942	rs71647030	A	T	0.0934	-1.26277	0.51282	-0.749947
chr1	12164390	12164391	rs11569850	G	C	0.0666	-1.70035	-0.358302	-2.05865
chr1	12164436	12164437	rs2230622	C	T	0.2296	0.858189	-0.810078	0.0481117
chr1	12166854	12166855	rs12092682	G	T	0.2346	-0.768774	0.0210378	-0.747736
chr1	12196147	12196148	rs1201118	G	A	0.6223	-1.01208	-0.275935	-1.28802
chr1	12203873	12203874	rs11569957	G	C	0.0209	-0.767219	0.0448593	-0.72236
chr1	12220254	12220255	rs114548520	C	A	0.0258	-0.762905	-0.951359	-1.71426
chr1	12220350	12220351	rs115539225	G	A	0.0318	0.5989	-1.28928	-0.690382
chr1	12221626	12221627	rs143584067	G	A	0.0129	1.03127	-1.24701	-0.215742
chr1	12224302	12224303	rs684014	C	A	0.1193	-1.06626	-0.565759	-1.63202
chr1	12230080	12230081	rs17883094	G	A	0.0189	1.45023	-1.81473	-0.364504
chr1	12230231	12230232	rs35812780	CCATT	C	0.0219	0.612162	-1.08195	-0.469791
chr1	12234210	12234211	rs541177343	T	C	0.0219	-0.620668	-1.18706	-1.80772
chr1	12235170	12235171	rs5745967	G	A	0.0249	-1.09246	0.523504	-0.568958
chr1	12235455	12235456	rs5745971	C	T	0.0249	0.599592	-0.251159	0.348432
chr1	12235723	12235724	rs17881148	C	G	0.0249	-0.95474	-1.02128	-1.97602
chr1	12244317	12244318	rs677844	T	C	0.2237	-0.886594	0.110438	-0.776156
chr1	12245731	12245732	rs4845897	T	A	0.1481	-0.641762	-0.600347	-1.24211
chr1	12246174	12246175	rs474247	C	T	0.2237	-1.42726	0.813655	-0.613604
chr1	12249019	12249020	rs1815530	C	T	0.2167	-0.785888	-0.925146	-1.71103
chr1	12290144	12290145	rs139881781	C	G	0.0577	-0.669838	-0.317734	-0.987573
chr1	12331614	12331615	rs235227	G	A	0.1421	-1.22148	-0.0903885	-1.31187
chr1	12370157	12370158	rs77348128	C	A	0.0109	0.615419	-1.1999	-0.584482
chr1	12408073	12408074	rs143652195	T	C	0.0109	-0.74363	0.1748	-0.568829
chr1	12513445	12513446	rs142391192	T	C	0.0109	0.713752	-1.09204	-0.37829
chr1	12514937	12514938	rs144908738	T	A	0.0129	-0.627109	-0.555592	-1.1827
chr1	12514938	12514939	rs151170965	T	A	0.0129	-1.70932	-0.490667	-2.19998
chr1	12541183	12541184	rs115037374	C	T	0.0109	-1.22127	1.12609	-0.0951718
chr1	12565874	12565875	rs139828623	G	A	0.0109	-0.654946	-0.898843	-1.55379
chr1	12570224	12570225	rs74324818	T	A	0.0398	0.617536	-0.99258	-0.375044
chr1	12573536	12573537	rs117586798	A	G	0.0109	0.60549	-0.326699	0.278791
chr1	12573822	12573823	rs12129750	G	A	0.1113	0.955784	-0.560818	0.394966
chr1	12585595	12585596	rs12095700	C	T	0.0577	-0.628203	-0.239753	-0.867956
chr1	12604994	12604995	rs6541026	T	C	0.6948	-0.766829	-0.827518	-1.59435
chr1	12609267	12609268	rs74790186	C	G	0.1054	0.724721	-1.51554	-0.790822
chr1	12612867	12612868	rs34494202	G	A	0.3231	0.661314	-1.31194	-0.650625
chr1	12612872	12612873	rs72642661	C	G	0.3231	-0.65507	-0.767672	-1.42274
chr1	12614070	12614071	rs12568880	G	A	0.0944	-0.640818	-0.0982605	-0.739078
chr1	12614256	12614257	rs115164428	C	T	0.0159	-1.16427	0.177816	-0.986458
chr1	12625100	12625101	rs10864570	T	C	0.2922	-0.782202	0.71782	-0.0643814
chr1	12626181	12626182	rs7517059	G	C	0.2843	-0.686593	0.444686	-0.241907
chr1	12626260	12626261	rs6541039	T	C	0.337	1.20846	-1.32197	-0.113506
chr1	12626455	12626456	rs142042331	GT	G	0.0338	-0.664299	-0.333384	-0.997683
chr1	12633101	12633102	rs77155474	C	T	0.0447	0.688301	-1.07698	-0.388683
chr1	12640460	12640461	rs2275873	C	G	0.0457	-0.911299	0.168041	-0.743258
chr1	12655889	12655890	rs190914209	C	T	0.0179	-0.639345	-0.381173	-1.02052
chr1	12656834	12656835	rs10864573	T	C	0.4881	0.650325	-0.274664	0.375661
chr1	12657815	12657816	rs112319506	G	A	0.0199	0.807502	-1.28281	-0.475307
chr1	12676454	12676455	rs76834451	T	A	0.0348	0.809425	-1.32954	-0.520116
chr1	12678189	12678190	rs114161112	G	A	0.0398	0.885355	-1.38671	-0.501353
chr1	12680179	12680180	rs6689733	G	A	0.8419	-0.879084	-0.166572	-1.04566
chr1	12695719	12695720	rs61777487	A	G	0.0159	-0.844218	-0.520505	-1.36472
chr1	12696574	12696575	rs76330974	G	A	0.0288	0.603066	-0.963265	-0.360199
chr1	12704488	12704489	rs145331925	G	A	0.0159	-0.642447	-0.250848	-0.893295
chr1	12719434	12719435	rs2256895	A	G	0.0338	-0.628102	-0.774048	-1.40215
chr1	12738441	12738442	rs116794853	T	G	0.0109	-0.690089	-0.934779	-1.62487
chr1	12738756	12738757	rs2255965	A	C	0.0736	0.794746	-0.802554	-0.00780766
chr1	13183421	13183422	rs28564063	T	C	0.0915	-0.918716	0.129541	-0.789174
chr1	13385403	13385404	rs201500811	G	A	0.7922	-0.628008	-0.985097	-1.6131
chr1	13789277	13789278	rs77677348	T	C	0.0964	-1.15421	-0.473752	-1.62796
chr1	13831376	13831377	rs12733022	C	T	0.0577	-0.653283	-0.24302	-0.896303
chr1	13851114	13851115	rs4372244	T	C	0.3678	1.01916	-1.6221	-0.602947
chr1	13861653	13861654	rs75684979	T	G	0.0398	0.754358	-1.17605	-0.421691
chr1	13861989	13861990	rs11805703	G	C	0.1481	-0.648867	-0.0235028	-0.672369
chr1	13863105	13863106	rs74707400	T	G	0.0398	-0.604518	-0.244338	-0.848857
chr1	13867890	13867891	rs4661648	G	A	0.1879	0.726352	-2.06112	-1.33477
chr1	13870795	13870796	rs404265	G	C	0.2575	-1.08021	-0.794169	-1.87438
chr1	13904035	13904036	rs241908	A	G	0.496	0.803857	-1.02582	-0.221962
chr1	13910926	13910927	rs35716585	A	G	0.1769	-0.625118	0.552313	-0.0728041
chr1	13915559	13915560	rs1272827	C	T	0.0646	0.662438	-1.34533	-0.682892
chr1	13967571	13967572	rs4661997	T	C	0.0736	1.28084	-0.354149	0.926686
chr1	13969175	13969176	rs11801826	A	T	0.0736	2.23122	-1.60353	0.627684
chr1	13969219	13969220	rs78109137	C	A	0.0736	-1.11035	0.539389	-0.570963
chr1	13992267	13992268	rs61775075	G	A	0.0169	-0.714592	-0.779665	-1.49426
chr1	14057477	14057478	rs146545513	C	T	0.0209	0.864349	-1.16273	-0.298377
chr1	14081138	14081139	rs2463872	C	G	0.0169	0.620109	-1.18455	-0.564446
chr1	14095653	14095654	rs41269799	C	T	0.0129	2.02145	-2.91371	-0.892266
chr1	14118976	14118977	rs116702257	A	C	0.0169	-0.812794	-0.342976	-1.15577
chr1	14119149	14119150	rs16852976	G	A	0.1034	-0.859993	0.0752869	-0.784706
chr1	14155677	14155678	rs2473231	G	C	0.6083	0.606353	-0.761884	-0.155532
chr1	14196114	14196115	rs74586186	A	G	0.1571	-0.622932	-0.166408	-0.78934
chr1	14220185	14220186	rs1358577	A	G	0.3429	0.757756	-0.510972	0.246784
chr1	14278580	14278581	rs10803437	T	A	0.1074	-1.01841	0.0784427	-0.939963
chr1	14292688	14292689	rs565264461	A	C	0.1412	0.653127	-0.768812	-0.115685
chr1	14294748	14294749	rs6429815	A	C	0.5775	-0.61281	-0.0813352	-0.694145
chr1	14323109	14323110	rs2005499	T	C	0.1441	-0.891165	0.401003	-0.490162
chr1	14332657	14332658	rs12730232	C	A	0.0805	0.731329	-1.3627	-0.631375
chr1	14347673	14347674	rs2359906	C	G	0.498	-0.600062	0.496067	-0.103995
chr1	14382126	14382127	rs55986908	G	A	0.2227	0.842999	-1.31386	-0.470858
chr1	14382496	14382497	rs34017193	C	T	0.2227	0.674998	-1.11085	-0.435848
chr1	14394224	14394225	rs715340	C	T	0.1074	-1.08947	-0.634748	-1.72421
chr1	14439208	14439209	rs13374167	A	G	0.2753	1.40971	-0.800538	0.60917
chr1	14461675	14461676	rs6683140	G	C	0.5706	-0.885854	0.581032	-0.304822
chr1	14461833	14461834	rs10737920	G	A	0.4662	-0.588316	-0.258861	-0.847177
chr1	14462145	14462146	rs4661474	G	A	0.4672	0.941581	-1.45162	-0.510043
chr1	14467196	14467197	rs147801886	C	T	0.0239	-1.21995	-0.79932	-2.01927
chr1	14475891	14475892	rs111719154	A	G	0.1054	0.799191	-1.30043	-0.501236
chr1	14582097	14582098	rs4127243	A	G	0.0497	0.697527	-0.460804	0.236723
chr1	14625431	14625432	rs7527299	A	G	0.5805	-0.943355	-0.493293	-1.43665
chr1	14665293	14665294	rs79147182	G	A	0.0219	-0.75255	-0.274121	-1.02667
chr1	14691874	14691875	rs28698594	G	C	0.0706	0.633377	-1.16465	-0.531275
chr1	14703853	14703854	rs11590846	C	T	0.3191	0.587009	-1.57626	-0.98925
chr1	14718956	14718957	rs7527767	C	T	0.3022	-0.864217	-0.773485	-1.6377
chr1	14722426	14722427	rs35956582	G	A	0.0338	0.852587	-1.64167	-0.789085
chr1	14722509	14722510	rs12401863	A	G	0.1928	0.617876	-1.65968	-1.0418
chr1	14806286	14806287	rs143211826	G	A	0.0239	-0.729518	0.458051	-0.271467
chr1	14887404	14887405	rs10927464	T	G	0.6262	-1.44414	0.323657	-1.12048
chr1	14917674	14917675	rs113700934	C	A,T	0.0129	-0.863321	-0.662721	-1.52604
chr1	14920942	14920943	rs2486778	C	G	0.7624	-0.661065	-0.8678	-1.52887
chr1	14925104	14925105	rs1295787	T	G	0.7714	0.753741	-1.08229	-0.328551
chr1	14969591	14969592	rs113744602	G	T	0.0467	-0.718138	0.298784	-0.419354
chr1	14987319	14987320	rs61673144	A	G	0.0169	0.884154	-0.963237	-0.0790834
chr1	15009819	15009820	rs1883661	T	C	0.5099	0.721667	-1.59302	-0.871352
chr1	15058434	15058435	rs12093159	A	T	0.172	0.591757	-1.13185	-0.540097
chr1	15059528	15059529	rs141363178	G	A	0.0209	0.58889	-1.07815	-0.489259
chr1	15152716	15152717	rs60243828	A	T	0.0239	-0.589733	-0.287866	-0.877599
chr1	15162401	15162402	rs78049388	C	G	0.0437	-0.790732	1.01797	0.227236
chr1	15162549	15162550	rs59399254	C	G	0.0915	0.95437	-1.9601	-1.00573
chr1	15162569	15162570	rs60776196	A	G	0.0915	1.02676	-0.624653	0.402106
chr1	15178794	15178795	rs61773566	G	A	0.0606	0.713187	-1.34275	-0.629559
chr1	15179116	15179117	rs61773567	T	C	0.0557	0.712646	-1.08807	-0.375425
chr1	15231608	15231609	rs61773601	C	T	0.1312	0.735769	-1.05858	-0.322811
chr1	15247406	15247407	rs79418535	C	T	0.0815	-0.59062	-0.854793	-1.44541
chr1	15288332	15288333	rs6676281	A	G	0.2704	0.761547	-1.97472	-1.21317
chr1	15295332	15295333	rs10927602	A	G	0.4632	0.596217	-1.24645	-0.650238
chr1	15314734	15314735	rs12562381	C	T	0.2604	0.737268	-1.6747	-0.937431
chr1	15314777	15314778	rs12568025	G	C	0.2575	0.662595	-0.401117	0.261478
chr1	15322581	15322582	rs74060145	G	C	0.0646	0.854468	-1.41819	-0.563722
chr1	15331298	15331299	rs78579428	A	G	0.1074	-0.969474	0.0762588	-0.893215
chr1	15331315	15331316	rs112959513	G	GT	0.1799	-1.05488	-0.619567	-1.67445
chr1	15342941	15342942	rs141595295	C	T	0.0159	0.68855	-0.640924	0.0476253
chr1	15347653	15347654	rs10927633	G	C	0.7346	-0.6616	-0.800865	-1.46246
chr1	15354140	15354141	rs74960082	G	A	0.0159	1.03979	-0.720725	0.319066
chr1	15362625	15362626	rs189187300	C	T	0.0437	0.830333	-0.892805	-0.0624719
chr1	15373037	15373038	rs10754879	G	A	0.5696	0.671356	-1.27404	-0.602686
chr1	15373377	15373378	rs10927657	G	T	0.338	0.722415	-1.21004	-0.487627
chr1	15403022	15403023	rs11581663	C	T	0.0467	-0.88207	-0.655588	-1.53766
chr1	15403035	15403036	rs10927668	C	T	0.2823	0.723618	-1.11112	-0.387498
chr1	15417122	15417123	rs116456725	G	A	0.0119	-0.743715	-0.617793	-1.36151
chr1	15443630	15443631	rs72640735	C	G	0.1948	-1.81749	-0.601845	-2.41933
chr1	15455306	15455307	rs55949759	T	C	0.1322	1.57537	-2.24208	-0.666709
chr1	15455422	15455423	rs4661578	C	T	0.337	0.742294	-1.38587	-0.643578
chr1	15468777	15468778	rs72640763	A	C	0.1769	-0.835996	-0.326662	-1.16266
chr1	15479576	15479577	rs2013089	C	G	0.7913	0.64503	-1.1449	-0.499872
chr1	15480678	15480679	rs145695656	G	A	0.0139	-0.924533	0.884293	-0.0402393
chr1	15494828	15494829	rs6688174	G	T	0.1431	0.609892	-1.71978	-1.10988
chr1	15499359	15499360	rs112982813	G	A	0.0109	0.837135	-0.184137	0.652998
chr1	15504402	15504403	rs10927698	T	G	0.4205	0.712298	-1.21894	-0.506642
chr1	15504519	15504520	rs35885122	T	G	0.1421	-0.730376	0.722741	-0.00763464
chr1	15504784	15504785	rs761298	A	C	0.2087	-0.689976	-0.405193	-1.09517
chr1	15505381	15505382	rs17381857	G	A	0.0885	-1.03348	0.632393	-0.401084
chr1	15505639	15505640	rs34498370	TG	T	0.1859	0.763849	-0.777804	-0.0139547
chr1	15506074	15506075	rs4661591	G	T	0.9871	-1.05671	-0.799654	-1.85637
chr1	15514711	15514712	rs72642309	T	C	0.2177	-0.669315	0.263215	-0.406099
chr1	15518173	15518174	rs10927710	G	A	0.1322	-0.847801	-0.532902	-1.3807
chr1	15518669	15518670	rs190174531	G	A	0.0119	0.633889	0.0982172	0.732106
chr1	15518695	15518696	rs56404681	G	C	0.0109	0.809774	-1.47657	-0.666798
chr1	15522110	15522111	rs61482262	G	C	0.2197	-0.788919	0.0960332	-0.692885
chr1	15525041	15525042	rs111878717	T	C	0.0288	1.14285	-1.26451	-0.121662
chr1	15528486	15528487	rs2050233	G	A	0.7714	0.988549	-0.613798	0.374751
chr1	15537121	15537122	rs12070469	C	T	0.3837	0.701594	-1.20555	-0.503958
chr1	15541398	15541399	rs3753317	A	G	0.163	0.703776	-1.10332	-0.399541
chr1	15552195	15552196	rs34085817	TGA	T	0.1292	-0.590415	-0.0423202	-0.632735
chr1	15573757	15573758	rs1780597	G	A	0.3767	-1.16245	0.434882	-0.727569
chr1	15613477	15613478	rs536364	G	A	0.5895	-0.615286	-0.528995	-1.14428
chr1	15639580	15639581	rs10489962	A	G	0.0567	0.703203	-1.15634	-0.45314
chr1	15691539	15691540	rs10803382	A	C	0.2893	-1.01805	0.0122235	-1.00582
chr1	15697182	15697183	rs876295	A	G	0.329	0.620147	-1.15282	-0.532674
chr1	15709974	15709975	rs6673066	C	T	0.0239	-0.994141	-0.403771	-1.39791
chr1	15710225	15710226	rs55823174	C	T	0.0288	1.52734	-1.91391	-0.386569
chr1	15710358	15710359	rs541201872	T	G	0.0219	0.675169	-0.551283	0.123886
chr1	15715809	15715810	rs115622161	C	T	0.0119	-0.682986	-1.23277	-1.91576
chr1	15728288	15728289	rs2473344	T	C	0.7366	0.744957	-1.33717	-0.592216
chr1	15744056	15744057	rs7529567	G	T	0.1163	-0.78444	-0.530665	-1.31511
chr1	15744286	15744287	rs67861674	C	T	0.1233	-0.814992	0.29135	-0.523642
chr1	15796615	15796616	rs10927790	C	T	0.174	0.72486	-0.801448	-0.0765882
chr1	15809427	15809428	rs12139377	C	T	0.2416	0.887828	-1.70032	-0.812492
chr1	15851063	15851064	rs4645982	A	ATCCCCGCACTGACCTCACG	0.5089	0.730503	-1.0854	-0.354901
chr1	15911030	15911031	rs10927808	T	G	0.5278	1.48269	-2.04761	-0.564916
chr1	15911621	15911622	rs111365202	A	AG	0.5278	0.955157	-1.84778	-0.892625
chr1	15921898	15921899	rs76000735	A	AC	0.2674	-1.05016	-0.599569	-1.64973
chr1	15922024	15922025	rs111815467	G	A	0.2634	-0.596783	-0.159999	-0.756783
chr1	16010629	16010630	rs77877913	G	A	0.0557	0.836915	-1.67073	-0.833819
chr1	16030381	16030382	rs72647148	G	A	0.0656	-0.68451	-0.528044	-1.21255
chr1	16033405	16033406	rs10927832	T	C	0.0557	-0.587198	-0.274938	-0.862136
chr1	16034200	16034201	rs10927835	T	A	0.0557	-0.719628	-0.0981608	-0.817789
chr1	16043791	16043792	rs138860807	C	T	0.0209	0.733318	-1.17271	-0.439393
chr1	16044928	16044929	rs35757484	A	G	0.1889	-0.94163	-0.879878	-1.82151
chr1	16044944	16044945	rs12091644	G	A	0.2445	-0.707717	-0.0008227	-0.708539
chr1	16047725	16047726	rs12734937	T	C	0.2445	1.00484	-1.11512	-0.110282
chr1	16061965	16061966	rs35352784	G	A	0.2107	0.67	-0.758571	-0.0885716
chr1	16068363	16068364	rs35365738	G	A	0.332	-0.624749	-0.54494	-1.16969
chr1	16082975	16082976	rs35609485	C	T	0.0974	-0.6427	-0.32288	-0.965579
chr1	16092492	16092493	rs114285195	C	T	0.0586	-1.15171	-0.701057	-1.85277
chr1	16092748	16092749	rs115326302	C	G	0.0616	1.30525	-0.411291	0.893961
chr1	16111013	16111014	rs144567113	C	T	0.0199	-1.05365	-0.124692	-1.17834
chr1	16115332	16115333	rs1472554	C	G	0.4235	0.694251	-1.19259	-0.498339
chr1	16142402	16142403	rs12029984	A	G	0.4483	0.743829	-1.00338	-0.259547
chr1	16212218	16212219	rs4661670	G	T	0.0616	-0.884699	-0.0350868	-0.919786
chr1	16275624	16275625	rs139183133	G	T	0.0129	-0.621338	-0.87705	-1.49839
chr1	16288527	16288528	rs11806925	G	A	0.0785	-0.777216	-1.0582	-1.83541
chr1	16292741	16292742	rs848199	C	T	0.5507	-0.85491	-0.327432	-1.18234
chr1	16309855	16309856	rs848312	C	T	0.9016	-0.766271	-0.867971	-1.63424
chr1	16339312	16339313	rs10927886	C	G	0.3936	0.672092	-1.37293	-0.700839
chr1	16339668	16339669	rs150361979	AGGGGGCTGCT	A	0.0835	0.707378	-2.26147	-1.5541
chr1	16340216	16340217	rs113462795	A	AACAGTGCTTGGC	0.5915	1.36132	0.108845	1.47017
chr1	16344401	16344402	rs945416	G	A	0.5934	-1.23404	-0.121838	-1.35588
chr1	16344682	16344683	rs872221	C	T	0.0716	0.610917	-0.350103	0.260813
chr1	16346247	16346248	rs3754324	G	C	0.0845	1.51901	-1.45182	0.0671903
chr1	16346270	16346271	rs56879303	C	T	0.0746	-0.746205	0.338324	-0.40788
chr1	16353399	16353400	rs9442216	T	C	0.675	0.926561	-1.23006	-0.303503
chr1	16373774	16373775	rs2863439	A	C	0.1064	0.684757	-1.07197	-0.387211
chr1	16375353	16375354	rs9442227	C	T	0.8211	-0.613083	0.168034	-0.445049
chr1	16382830	16382831	rs61769890	T	A	0.4433	-1.8615	0.0722882	-1.78921
chr1	16382833	16382834	rs61769891	T	A	0.4433	-1.04764	0.576688	-0.470955
chr1	16382876	16382877	rs7517792	A	G	0.7932	0.814485	-1.1312	-0.31672
chr1	16391567	16391568	rs79926666	G	A	0.0318	-0.784936	-0.593619	-1.37855
chr1	16401777	16401778	rs113884821	G	A	0.0308	0.751803	-0.535911	0.215892
chr1	16408819	16408820	rs4077113	G	C	0.1849	0.897506	-2.14892	-1.25141
chr1	16415340	16415341	rs4661353	T	C	0.7048	2.01219	-2.85394	-0.841742
chr1	16415660	16415661	rs28638141	G	A	0.171	-0.847912	0.0798428	-0.76807
chr1	16415895	16415896	rs78403305	C	T	0.0775	0.722231	-0.590027	0.132204
chr1	16455142	16455143	rs4661707	T	C	0.9682	0.915316	-0.711877	0.203439
chr1	16465403	16465404	rs11260744	C	T	0.0895	0.592346	-0.042264	0.550082
chr1	16490698	16490699	rs11588669	G	A	0.0427	-0.922495	0.350268	-0.572227
chr1	16492020	16492021	rs12408442	T	C	0.4066	-1.19864	0.0251272	-1.17351
chr1	16492060	16492061	rs68124406	C	A	0.0408	1.91455	-1.31969	0.594856
chr1	16494014	16494015	rs4661357	C	G	0.9443	1.16704	-1.7688	-0.601751
chr1	16502255	16502256	rs6603888	C	G	0.334	0.661667	-0.873194	-0.211526
chr1	16505907	16505908	rs4661718	C	T	0.6123	-0.822682	0.18518	-0.637503
chr1	16533021	16533022	rs221052	C	T	0.7406	-1.29435	0.3281	-0.966255
chr1	16533816	16533817	rs170234	T	C	0.2654	-1.10558	-0.319021	-1.4246
chr1	16533829	16533830	rs3832000	AATTC	A	0.7435	0.597301	-1.05261	-0.455311
chr1	16570838	16570839	rs6683278	T	C	0.335	0.96339	-1.86536	-0.901972
chr1	16575342	16575343	rs41301993	C	T	0.0159	-0.836626	-0.255749	-1.09238
chr1	16620159	16620160	rs2994142	T	C	0.7584	0.59919	-1.20418	-0.604993
chr1	16667540	16667541	rs11260731	G	C	0.3141	1.11164	-1.35962	-0.247977
chr1	16720116	16720117	rs144937376	G	A	0.0328	-1.17322	0.529943	-0.643277
chr1	16720205	16720206	rs56344045	C	G	0.1074	0.675334	0.0573868	0.732721
chr1	16802391	16802392	rs114074695	G	C	0.0716	-0.600124	-0.15912	-0.759243
chr1	16803266	16803267	rs156846	T	C	0.6958	0.858048	-0.945813	-0.087765
chr1	16804340	16804341	rs156847	G	A	0.6938	-0.663549	-0.950243	-1.61379
chr1	16810032	16810033	rs202117117	GC	G	0.0179	1.36211	-1.71403	-0.35192
chr1	16810289	16810290	rs281826	C	T	0.5318	-0.662828	-0.268886	-0.931713
chr1	16810300	16810301	rs281827	T	C	0.5328	0.63557	-0.438829	0.196741
chr1	16813065	16813066	rs2165678	C	T	0.3052	-0.640944	1.22172	0.580777
chr1	16825606	16825607	rs156863	A	T	0.3161	0.950447	-0.248008	0.702439
chr1	16833194	16833195	rs61769468	G	C	0.4284	1.36118	-0.980146	0.381033
chr1	16840270	16840271	rs9439618	G	C	0.3489	-0.614348	-0.32661	-0.940958
chr1	16841099	16841100	rs157256	A	G	0.6223	-0.819416	1.53375	0.714333
chr1	16847189	16847190	rs277460	G	C	0.5368	-0.675372	-0.561366	-1.23674
chr1	16847831	16847832	rs277462	T	C	0.5974	1.13396	-1.01883	0.115129
chr1	16848015	16848016	rs113723037	G	A	0.0378	-0.82169	-0.289809	-1.1115
chr1	16859375	16859376	rs11485886	G	A	0.0109	0.72329	-1.54274	-0.819452
chr1	16867483	16867484	rs61082357	C	CA	0.4016	-0.917495	-0.560423	-1.47792
chr1	16872519	16872520	rs58328532	G	A	0.5239	-0.896282	-0.387459	-1.28374
chr1	16892564	16892565	rs202086630	G	A	0.0467	0.695429	-1.44014	-0.744711
chr1	16939716	16939717	rs9329437	G	C	0.6272	0.722479	-1.49917	-0.776693
chr1	16940286	16940287	rs113677251	C	T	0.1153	0.753459	-1.77274	-1.01928
chr1	16945234	16945235	rs554386388	CTTAT	C	0.0507	-0.73416	-0.720316	-1.45448
chr1	16947626	16947627	rs557398636	C	G	0.0417	0.881601	-1.19889	-0.317294
chr1	16947750	16947751	rs377722	G	C	0.0616	0.629485	-0.77429	-0.144806
chr1	16956467	16956468	rs1762951	A	T	0.4364	1.26024	-1.60853	-0.348288
chr1	16957609	16957610	rs879364	G	A	0.1272	0.877879	-1.2535	-0.375618
chr1	16957973	16957974	rs9729611	G	C	0.0487	-1.44769	-1.04519	-2.49288
chr1	16957982	16957983	rs2761548	C	T	0.3618	0.821238	-0.710143	0.111095
chr1	16958063	16958064	rs1622521	A	G	0.6083	1.03642	-1.20267	-0.166257
chr1	16958423	16958424	rs11590312	G	C	0.2177	-0.690229	-0.676526	-1.36676
chr1	16971189	16971190	rs28468375	C	T	0.0358	0.806216	-0.785645	0.0205712
chr1	16971861	16971862	rs10796422	A	G	0.2763	-0.60356	-0.919646	-1.52321
chr1	16975437	16975438	rs201921002	C	G	0.0447	-0.774233	-0.527669	-1.3019
chr1	16983098	16983099	rs372271483	T	C	0.3618	0.743984	-0.592202	0.151782
chr1	16984009	16984010	rs201771886	G	C	0.4911	-1.03289	-0.811065	-1.84395
chr1	17007386	17007387	rs139527155	C	G	0.0258	-0.861924	-0.0583588	-0.920283
chr1	17020457	17020458	rs111561567	G	T	0.0378	0.615767	-0.399	0.216767
chr1	17026651	17026652	rs139977165	C	A	0.0457	1.96187	-2.12794	-0.166077
chr1	17026802	17026803	rs567371	C	T	0.6779	-0.890197	0.404686	-0.48551
chr1	17027316	17027317	rs190892467	G	C	0.0477	-0.602489	-0.655002	-1.25749
chr1	17034040	17034041	rs2743505	T	C	0.7982	-1.03264	0.179443	-0.853195
chr1	17046438	17046439	rs9728204	C	A	0.1829	0.829981	-1.79801	-0.96803
chr1	17051623	17051624	rs67153740	G	T	0.0258	-0.981466	0.679912	-0.301555
chr1	17053815	17053816	rs2419165	C	G	0.3032	-1.95092	-0.402905	-2.35383
chr1	17053823	17053824	rs5016504	A	T	0.3032	0.647401	-1.44146	-0.794059
chr1	17054303	17054304	rs60083128	G	C	0.0398	0.944088	-1.35045	-0.406365
chr1	17055598	17055599	rs2990556	A	G	0.3111	1.07863	-1.38016	-0.301526
chr1	17077241	17077242	rs200157489	G	C	0.3678	-1.1387	0.714759	-0.423938
chr1	17084814	17084815	rs11260922	G	A	0.6272	0.788139	0.253505	1.04164
chr1	17086310	17086311	rs61769739	G	T	0.1501	-0.870371	-0.737997	-1.60837
chr1	17092181	17092182	rs546790757	AG	A	0.0547	0.636217	-1.44712	-0.810904
chr1	17193440	17193441	rs145637472	C	CT	0.504	-0.925417	-0.516408	-1.44182
chr1	17215459	17215460	rs202117824	G	GA,GC	0.0915	-0.904375	-0.758629	-1.663
chr1	17215666	17215667	rs11801249	G	A	0.0477	-0.772095	0.0581472	-0.713948
chr1	17215981	17215982	rs3738617	C	A,T	0.3996	0.597651	-0.385233	0.212419
chr1	17216079	17216080	rs3738618	T	C	0.2356	0.792378	-1.47151	-0.679131
chr1	17216134	17216135	rs6684252	G	C	0.7972	0.659037	-1.26046	-0.601421
chr1	17222461	17222462	rs10158908	G	A	0.3072	-0.637016	-0.468018	-1.10503
chr1	17222465	17222466	rs201450225	G	C	0.2565	-0.624336	-0.725796	-1.35013
chr1	17222652	17222653	rs67606166	CT	C	0.9036	-0.860354	0.370958	-0.489396
chr1	17222895	17222896	rs4562613	G	C	0.4573	0.813455	-1.50995	-0.696495
chr1	17223267	17223268	rs184459522	C	A	0.0149	-0.712547	-0.287503	-1.00005
chr1	17223617	17223618	rs6586524	T	C	0.9036	-0.603267	-0.911428	-1.51469
chr1	17231750	17231751	rs71512926	T	C	0.8986	0.776602	-1.27069	-0.494086
chr1	17231762	17231763	rs80315653	G	A	0.6431	-0.723529	-0.546987	-1.27052
chr1	17232080	17232081	rs3890521	C	T	0.3042	-0.645371	0.609014	-0.036357
chr1	17236385	17236386	rs79678917	A	C	0.0477	1.05957	-1.3754	-0.315836
chr1	17256849	17256850	rs147451230	C	T	0.0179	-0.968524	-0.564022	-1.53255
chr1	17272579	17272580	rs200713245	T	TC	0.0517	-0.629102	-0.404217	-1.03332
chr1	17275053	17275054	rs6698564	G	C	0.2922	1.61664	-2.18978	-0.573137
chr1	17290393	17290394	rs142234235	G	T	0.0497	0.781856	-1.33842	-0.556561
chr1	17293659	17293660	rs12097163	G	C	0.8012	-0.946233	0.522112	-0.424121
chr1	17306590	17306591	rs189266865	C	A	0.0179	-0.593979	-0.212481	-0.80646
chr1	17306869	17306870	rs55750792	G	A	0.495	-0.714048	0.391393	-0.322655
chr1	17306922	17306923	rs56265117	C	T	0.2833	1.18904	-2.09409	-0.90505
chr1	17311534	17311535	rs138786667	C	G	0.0159	-1.89711	0.358633	-1.53847
chr1	17336252	17336253	rs6662202	C	T	0.2078	-0.686219	-0.783413	-1.46963
chr1	17342734	17342735	rs2647166	T	A	0.7217	0.753237	-0.398405	0.354833
chr1	17342782	17342783	rs11203280	G	T	0.3549	-0.955303	-0.62339	-1.57869
chr1	17370119	17370120	rs11203285	T	C	0.5159	0.855598	-0.7791	0.076498
chr1	17372621	17372622	rs6690934	T	C	0.5169	0.738341	-1.82979	-1.09145
chr1	17389408	17389409	rs2746541	C	T	0.0815	-1.21127	-0.594343	-1.80561
chr1	17389579	17389580	rs11203290	C	T	0.325	-0.685467	-0.308079	-0.993546
chr1	17389979	17389980	rs2746540	A	G	0.9722	1.27453	-1.90763	-0.633109
chr1	17390068	17390069	rs2746539	G	A	0.0825	-1.50638	-0.76903	-2.27541
chr1	17390455	17390456	rs2746538	T	C	0.9722	0.62826	-0.0904246	0.537836
chr1	17417957	17417958	rs11588995	C	T	0.3688	-0.788045	-0.789829	-1.57787
chr1	17503417	17503418	rs3003453	C	T	0.2724	-0.726693	-0.692581	-1.41927
chr1	17511784	17511785	rs3003462	C	T	0.332	0.608241	-0.675097	-0.0668556
chr1	17514032	17514033	rs115017113	C	G	0.0229	-0.660612	-0.221837	-0.882448
chr1	17533467	17533468	rs12138305	A	G	0.3241	1.10197	-1.34927	-0.247301
chr1	17534309	17534310	rs4384275	C	T	0.3171	0.91446	-1.50478	-0.590321
chr1	17542795	17542796	rs56852811	A	C	0.0199	0.743323	-0.849463	-0.10614
chr1	17560194	17560195	rs35408430	C	T	0.3618	-1.03613	0.185184	-0.85095
chr1	17560645	17560646	rs12026071	T	C	0.2306	-1.23356	-1.07771	-2.31128
chr1	17563966	17563967	rs2977306	T	C	0.4225	0.586927	-0.594375	-0.0074478
chr1	17600821	17600822	rs11203346	A	G	0.1759	0.763111	-1.29586	-0.532751
chr1	17657037	17657038	rs67611752	GAGCCCCTAGCA	G	0.5736	0.625835	-1.07514	-0.449304
chr1	17675712	17675713	rs71644039	C	G	0.0249	-0.641285	-0.215164	-0.85645
chr1	17676773	17676774	rs72637425	A	G	0.2853	0.691497	-1.3854	-0.6939
chr1	17676968	17676969	rs12752914	T	C	0.0358	0.997826	-1.54763	-0.549801
chr1	17677039	17677040	rs12725408	G	A	0.0358	0.613547	-1.33334	-0.719796
chr1	17677045	17677046	rs74632628	C	A	0.0199	0.964466	-1.62548	-0.661012
chr1	17688038	17688039	rs4920370	T	C	0.4851	-0.872419	-0.323948	-1.19637
chr1	17703692	17703693	rs1204864	G	T	0.0368	-0.631186	-0.955157	-1.58634
chr1	17721387	17721388	rs6691485	C	T	0.6153	-1.0106	-0.103758	-1.11435
chr1	17733135	17733136	rs2800699	C	T	0.6103	-0.665778	0.285037	-0.380741
chr1	17735999	17736000	rs541326107	C	T	0.0109	-0.830817	0.266721	-0.564097
chr1	17750262	17750263	rs12728891	G	C	0.0885	1.00439	-0.676962	0.327427
chr1	17763516	17763517	rs2800687	A	G	0.6054	0.633762	-0.738628	-0.104867
chr1	17846722	17846723	rs3850723	C	T	0.4175	-0.868263	0.517415	-0.350848
chr1	17871604	17871605	rs2265731	G	T	0.0666	-0.862396	0.0585092	-0.803887
chr1	17872027	17872028	rs4920374	G	A	0.4911	-0.589153	-0.171568	-0.760721
chr1	17878781	17878782	rs2243576	T	G	0.0547	-0.892624	-0.388231	-1.28086
chr1	17896533	17896534	rs58780770	T	A	0.0288	0.949914	-1.11846	-0.168542
chr1	17914845	17914846	rs1193343	C	T	0.84	-0.754453	-0.727347	-1.4818
chr1	17970755	17970756	rs3753379	T	C	0.1521	0.609427	-0.797744	-0.188317
chr1	17996312	17996313	rs150199284	G	T	0.0179	1.67726	-2.43374	-0.756482
chr1	18027973	18027974	rs111249337	G	A	0.0169	-1.11558	-0.406107	-1.52169
chr1	18090200	18090201	rs4920633	A	G	0.3429	-0.773985	-1.04974	-1.82372
chr1	18092287	18092288	rs6690507	C	G	0.0348	-0.628341	-0.315784	-0.944125
chr1	18114204	18114205	rs55857489	C	T	0.1074	0.85074	-1.03007	-0.179335
chr1	18122064	18122065	rs11288030	TA	T	0.1461	-0.664126	-0.566178	-1.2303
chr1	18145963	18145964	rs147382335	G	T	0.0119	-0.675153	0.172053	-0.5031
chr1	18199651	18199652	rs588987	T	C	0.675	-0.863343	-0.162636	-1.02598
chr1	18199827	18199828	rs912103	T	C	0.1968	-0.948238	0.603415	-0.344823
chr1	18199859	18199860	rs72651115	G	A	0.0249	-0.95687	-0.306812	-1.26368
chr1	18217542	18217543	rs642862	T	C	0.172	-1.22929	-0.0892432	-1.31854
chr1	18217544	18217545	rs185208023	C	G	0.0348	-0.68355	0.293903	-0.389647
chr1	18235934	18235935	rs4920652	G	A	0.1392	0.780946	-0.87901	-0.0980639
chr1	18247810	18247811	rs7554885	G	T	0.2048	1.72603	-2.31217	-0.586133
chr1	18248069	18248070	rs2225771	G	A	0.336	-0.674347	0.0547054	-0.619642
chr1	18249742	18249743	rs12092756	C	T	0.3807	0.694593	-1.31274	-0.618143
chr1	18257197	18257198	rs143183633	T	C	0.0109	-0.768641	-0.454345	-1.22299
chr1	18328506	18328507	rs77807763	G	T	0.834	-0.593092	0.0764909	-0.516601
chr1	18328507	18328508	rs76961111	G	T	0.834	-0.82885	0.225644	-0.603206
chr1	18359579	18359580	rs12067141	G	A	0.2435	-0.593213	-0.612398	-1.20561
chr1	18393196	18393197	rs76561268	G	T	0.0437	-1.70405	0.198059	-1.50599
chr1	18393490	18393491	rs12067991	C	G	0.504	0.790036	-1.89183	-1.10179
chr1	18393494	18393495	rs79127486	C	T	0.0437	0.770804	-1.85137	-1.08056
chr1	18420966	18420967	rs115340548	A	C	0.0119	-0.606858	0.0847298	-0.522128
chr1	18427030	18427031	rs12740505	G	A	0.5129	-0.824571	-0.228684	-1.05325
chr1	18427202	18427203	rs34094931	G	C	0.0258	0.649333	-0.611106	0.0382272
chr1	18435478	18435479	rs148662186	A	AGTGTGTGTGTGTGT	0.5308	-0.621632	-0.294768	-0.9164
chr1	18435767	18435768	rs34016995	C	G	0.0268	-0.835555	-0.375319	-1.21087
chr1	18437105	18437106	rs35002297	G	T	0.0268	0.621851	-0.708336	-0.0864851
chr1	18437653	18437654	rs12136260	T	C	0.8479	-0.745137	0.381924	-0.363213
chr1	18437817	18437818	rs1869807	A	G	0.4761	-1.04352	-0.702897	-1.74641
chr1	18442736	18442737	rs35800064	C	T	0.2783	-1.10993	-1.05423	-2.16416
chr1	18459401	18459402	rs11261082	T	C	0.9761	1.29325	-1.63921	-0.345967
chr1	18459845	18459846	rs75282026	G	A	0.0129	0.870797	-0.610967	0.25983
chr1	18475787	18475788	rs72655121	G	A	0.0388	0.594082	-1.28007	-0.685991
chr1	18476230	18476231	rs9727948	T	C	0.3549	-0.918648	-0.334501	-1.25315
chr1	18493075	18493076	rs11802233	G	A	0.1928	-0.910926	-0.244432	-1.15536
chr1	18497902	18497903	rs12735570	T	C	0.0865	-1.06275	1.16382	0.101067
chr1	18626916	18626917	rs1832787	G	A	0.4145	0.647405	-0.147471	0.499934
chr1	18645858	18645859	rs139026929	A	C	0.0169	-1.29171	0.685887	-0.60582
chr1	18655389	18655390	rs4920312	G	A	0.4304	-0.881557	-0.648729	-1.53029
chr1	18696214	18696215	rs882916	A	G	0.7565	0.975459	-0.922204	0.0532549
chr1	18699950	18699951	rs10907306	A	T	0.7555	0.676872	0.425961	1.10283
chr1	18700090	18700091	rs71645411	C	T	0.1083	0.962815	-1.60214	-0.639324
chr1	18712327	18712328	rs6684536	C	T	0.2823	-0.591132	0.274847	-0.316285
chr1	18722712	18722713	rs1336130	T	C	0.4423	-1.20277	0.804796	-0.397974
chr1	18722736	18722737	rs1336131	G	T	0.0974	-0.773347	0.605404	-0.167943
chr1	18739669	18739670	rs7522180	G	A	0.3062	0.609405	-0.505552	0.103852
chr1	18807619	18807620	rs34109355	G	C	0.1233	0.91556	-1.30696	-0.391397
chr1	18911346	18911347	rs2745309	G	A	0.4682	-0.670522	0.0846884	-0.585834
chr1	18976179	18976180	rs1572722	C	G	0.0557	-0.732295	0.176334	-0.55596
chr1	18976465	18976466	rs34064724	C	T	0.0358	-0.644143	-0.84637	-1.49051
chr1	18976532	18976533	rs9439715	A	C	0.5477	-0.656259	0.24908	-0.407179
chr1	19029286	19029287	rs2743198	T	C	0.0169	0.781838	-0.43684	0.344998
chr1	19089146	19089147	rs79705496	G	C	0.0865	-1.4385	0.354189	-1.08431
chr1	19110492	19110493	rs12041980	A	T	0.0278	-0.60994	0.144753	-0.465187
chr1	19112567	19112568	rs76369903	A	T	0.0815	1.04551	-1.77012	-0.724604
chr1	19112835	19112836	rs9439748	A	G	0.0805	-0.747167	0.356366	-0.390802
chr1	19112850	19112851	rs116404531	T	C	0.0805	-0.752685	0.175277	-0.577408
chr1	19147451	19147452	rs114417072	C	A	0.0129	-0.834292	0.355403	-0.478889
chr1	19200907	19200908	rs28529092	G	C	0.4692	1.05394	-2.01001	-0.956076
chr1	19201145	19201146	rs28758607	C	G	0.0268	0.975839	-1.29217	-0.316331
chr1	19201282	19201283	rs74056665	G	A	0.0706	1.05223	-0.173458	0.878771
chr1	19201622	19201623	rs28663527	A	G	0.7386	0.759489	-0.583419	0.17607
chr1	19202022	19202023	rs6661040	C	T	0.0268	0.854384	-1.50609	-0.651704
chr1	19202212	19202213	rs28403282	C	T	0.0268	0.716254	-0.339371	0.376884
chr1	19210815	19210816	rs7365362	C	T	0.7843	-0.620269	-0.806004	-1.42627
chr1	19221430	19221431	rs28715641	G	A	0.0189	-1.2156	-0.707158	-1.92276
chr1	19228548	19228549	rs78822272	G	T	0.2167	-0.712174	-0.681011	-1.39318
chr1	19228804	19228805	rs9426678	T	A	0.0388	0.862244	-2.0599	-1.19766
chr1	19229610	19229611	rs138391405	C	G	0.0388	1.3241	-1.27244	0.0516646
chr1	19233926	19233927	rs144095101	A	C	0.0169	-1.58255	1.51583	-0.0667138
chr1	19240539	19240540	rs28498013	T	C	0.0298	0.935544	-1.66437	-0.728823
chr1	19240683	19240684	rs6678885	A	C	0.2296	-0.605187	-0.417588	-1.02278
chr1	19248823	19248824	rs2180120	T	C	0.9672	-0.639636	-0.385054	-1.02469
chr1	19248900	19248901	rs58957999	A	G	0.2058	-0.898847	0.153024	-0.745823
chr1	19249319	19249320	rs6426799	C	G	0.828	0.802489	-1.38248	-0.579987
chr1	19250285	19250286	rs9426699	T	G	0.2058	0.734201	-0.75205	-0.0178489
chr1	19271879	19271880	rs186268478	G	A	0.0109	0.866731	-1.32399	-0.457261
chr1	19277328	19277329	rs115941959	C	T	0.0119	0.848289	0.0309868	0.879276
chr1	19289126	19289127	rs28441270	C	T	0.5666	-0.641668	-0.00683036	-0.648499
chr1	19299239	19299240	rs7545729	G	C	0.5467	-0.601944	-0.251791	-0.853734
chr1	19336265	19336266	rs28658160	A	G	0.4463	1.01429	-1.74606	-0.731763
chr1	19339069	19339070	rs6426630	G	A	0.0507	-0.846183	0.100161	-0.746022
chr1	19344585	19344586	rs7545211	A	G	0.7843	0.646968	-0.928926	-0.281958
chr1	19354504	19354505	rs12747682	A	G	0.3459	0.605146	-0.77703	-0.171884
chr1	19387118	19387119	rs61763750	T	C	0.9662	-1.00542	-0.542389	-1.54781
chr1	19401404	19401405	rs2281748	G	A	0.4145	0.60474	-0.562056	0.0426836
chr1	19408293	19408294	rs67232976	G	GC	0.4026	-0.842215	-0.636621	-1.47884
chr1	19435065	19435066	rs114288128	T	C	0.0209	0.746362	-0.989786	-0.243424
chr1	19435240	19435241	rs7534950	T	A	0.0656	-0.894108	-0.38873	-1.28284
chr1	19435431	19435432	rs4912048	G	T	0.6074	0.591469	-1.17534	-0.583873
chr1	19446387	19446388	rs2296104	T	C	0.6064	-0.883345	-0.114212	-0.997557
chr1	19489961	19489962	rs188453941	G	C	0.0109	0.65598	-0.594252	0.0617279
chr1	19578052	19578053	rs6680255	C	G	0.1004	-0.60936	-0.654738	-1.2641
chr1	19578191	19578192	rs2294942	G	A	0.6282	-1.2849	0.887525	-0.397378
chr1	19584528	19584529	rs77776407	G	A	0.0109	0.754381	-0.545892	0.208489
chr1	19584577	19584578	rs12121472	T	C	0.0974	-0.796592	-0.765812	-1.5624
chr1	19586570	19586571	rs1063986	T	C	0.1004	-0.789756	0.0676195	-0.722137
chr1	19586780	19586781	rs55694830	C	T	0.0288	-0.733011	-0.277416	-1.01043
chr1	19600207	19600208	rs115359581	C	G	0.0288	-1.06556	-0.410246	-1.47581
chr1	19600613	19600614	rs148802056	C	G	0.0288	-0.687749	-0.821361	-1.50911
chr1	19641920	19641921	rs859216	T	C	0.6392	1.19779	-1.47066	-0.272869
chr1	19652062	19652063	rs11558390	G	A	0.2873	0.664099	-0.762854	-0.0987553
chr1	19652127	19652128	rs113123686	GT	G	0.2893	0.652477	-1.00146	-0.348982
chr1	19665846	19665847	rs8329	G	A	0.0467	0.755675	-0.461819	0.293856
chr1	19675256	19675257	rs77620107	G	T	0.0328	-0.915097	-0.0103396	-0.925436
chr1	19713875	19713876	rs12049019	T	C	0.331	-1.14613	-0.860442	-2.00657
chr1	19717960	19717961	rs140616536	CAGAGG	C	0.2425	-1.08201	0.155662	-0.926352
chr1	19722381	19722382	rs150803149	C	T	0.0169	-0.615857	0.102851	-0.513005
chr1	19727061	19727062	rs10799809	C	T	0.5765	-0.725901	0.186991	-0.53891
chr1	19753017	19753018	rs141811967	G	T	0.0119	0.607633	-1.16285	-0.555212
chr1	19756824	19756825	rs75287297	G	A	0.0527	-1.51014	0.637574	-0.872567
chr1	19756868	19756869	rs10917449	A	G	0.2425	0.588433	-0.760233	-0.1718
chr1	19761553	19761554	rs72653926	G	A	0.4274	-0.714118	-0.372993	-1.08711
chr1	19761893	19761894	rs34655486	T	C	0.1352	-0.782668	0.896361	0.113693
chr1	19763395	19763396	rs12137162	C	A	0.2654	-0.633595	0.167601	-0.465994
chr1	19764563	19764564	rs115671002	C	T	0.0219	0.830762	-1.01848	-0.187718
chr1	19766429	19766430	rs12140338	C	G	0.2654	1.21229	-0.917961	0.294333
chr1	19766746	19766747	rs10158117	G	C	0.2654	0.650149	-1.12812	-0.477967
chr1	19770255	19770256	rs10799812	C	T	0.2654	-0.591812	-0.152316	-0.744128
chr1	19775565	19775566	rs1546264	G	A	0.2336	-0.66401	0.855114	0.191104
chr1	19781246	19781247	rs2014772	C	T	0.2614	-0.590506	-0.489835	-1.08034
chr1	19781723	19781724	rs34746930	C	G	0.1173	-0.591665	0.486039	-0.105626
chr1	19785333	19785334	rs2088824	G	T	0.6471	0.586385	-0.541906	0.0444792
chr1	19789696	19789697	rs12401874	C	G	0.2992	-0.780819	-1.09492	-1.87574
chr1	19795830	19795831	rs72653963	T	C	0.0189	0.694552	-1.15719	-0.462642
chr1	19821368	19821369	rs16822407	C	A	0.334	-0.878982	0.309507	-0.569475
chr1	19821839	19821840	rs2088825	C	T	0.4781	0.807398	-0.876786	-0.0693876
chr1	19832162	19832163	rs115738687	G	A	0.0149	-0.678298	-0.413989	-1.09229
chr1	19832398	19832399	rs74998309	C	A	0.0268	0.812565	-0.850512	-0.0379479
chr1	19833727	19833728	rs10799820	G	C	0.1541	0.830491	-1.11235	-0.28186
chr1	19890330	19890331	rs34087508	C	G	0.3966	-0.836218	0.381586	-0.454632
chr1	19891165	19891166	rs71579803	G	GGCATTTATTAAACACCTGCATTTATTAAACA	0.5338	-1.3236	-0.096435	-1.42004
chr1	19891335	19891336	rs144875602	A	G	0.0278	0.795954	-1.68816	-0.892202
chr1	19906377	19906378	rs840262	C	T	0.0994	-1.05699	0.310671	-0.746322
chr1	19908707	19908708	rs1737412	G	A	0.0994	1.19695	-2.29437	-1.09743
chr1	19936089	19936090	rs1737417	T	C	0.8618	0.782659	-1.08186	-0.299203
chr1	19986340	19986341	rs12747702	A	T	0.1093	-1.13103	-0.733936	-1.86497
chr1	20014752	20014753	rs7527271	G	A	0.6551	0.666566	-1.50763	-0.841066
chr1	20022062	20022063	rs4244007	A	G,T	0.8539	-0.964256	-0.445949	-1.4102
chr1	20024383	20024384	rs35129869	G	T	0.1292	1.34918	-2.21712	-0.867941
chr1	20041972	20041973	rs11589338	T	C	0.1004	0.702051	-1.07864	-0.376586
chr1	20078919	20078920	rs79524213	C	T	0.0159	1.40678	-1.30201	0.104766
chr1	20091790	20091791	rs2281246	T	C	0.4036	0.720608	-1.54076	-0.820156
chr1	20091947	20091948	rs55932504	CAT	C	0.5109	0.661481	-0.269617	0.391864
chr1	20092047	20092048	rs75141678	G	GTC	0.1382	0.703395	-1.1465	-0.443109
chr1	20120227	20120228	rs114489742	A	G	0.0298	-0.632602	-0.320184	-0.952786
chr1	20140972	20140973	rs35541730	G	T	0.0318	-0.645262	0.201785	-0.443478
chr1	20171859	20171860	rs6426833	G	A	0.5487	1.23872	-0.55273	0.685989
chr1	20186335	20186336	rs148784768	G	A	0.0239	0.660488	-0.634891	0.0255976
chr1	20186580	20186581	rs12121573	T	G	0.3449	1.39035	-1.06422	0.326138
chr1	20208782	20208783	rs72658579	T	C	0.2575	0.651297	-1.72339	-1.07209
chr1	20238372	20238373	rs61769080	G	A	0.0557	0.671413	-0.741136	-0.0697227
chr1	20238575	20238576	rs145839450	A	AT	0.0557	-1.09226	0.307955	-0.78431
chr1	20285893	20285894	rs149216267	C	T	0.2674	0.625036	-1.17104	-0.546005
chr1	20290415	20290416	rs12042771	G	A	0.2445	-0.988191	0.236601	-0.75159
chr1	20296998	20296999	rs1891319	T	A	0.2803	-1.98636	1.20632	-0.780038
chr1	20396414	20396415	rs11573191	G	A	0.165	-1.25888	0.0831226	-1.17576
chr1	20427720	20427721	rs112379629	C	T	0.0219	-0.906479	-1.04296	-1.94943
chr1	20437255	20437256	rs62541951	C	G	0.0258	-0.874182	-0.498087	-1.37227
chr1	20437627	20437628	rs62541948	A	C,G	0.0388	-0.844479	-0.228979	-1.07346
chr1	20451280	20451281	rs7531682	C	T	0.1471	-0.669554	-0.57224	-1.24179
chr1	20454420	20454421	rs12755057	G	C	0.172	0.901791	-1.90595	-1.00416
chr1	20454582	20454583	rs142394211	A	T	0.0368	-0.751279	-0.162365	-0.913644
chr1	20491131	20491132	rs12139181	G	C	0.1839	-2.30399	1.17422	-1.12977
chr1	20538162	20538163	rs4654840	C	T	0.7813	-0.669912	-0.73405	-1.40396
chr1	20554522	20554523	rs141069528	AACAGGGGAT	A	0.0239	0.64646	-1.03348	-0.387022
chr1	20582187	20582188	rs74785116	C	A	0.0567	-0.809063	-0.742105	-1.55117
chr1	20609113	20609114	rs2205721	C	T	0.6312	0.636523	-0.581061	0.0554612
chr1	20629226	20629227	rs12408023	G	C	0.2227	0.648104	-1.70571	-1.05761
chr1	20635027	20635028	rs12093685	G	A	0.1958	0.836018	-1.09517	-0.259151
chr1	20635129	20635130	rs10753496	T	C	0.4245	0.60583	-0.750026	-0.144196
chr1	20650451	20650452	rs10753497	T	C	0.4354	0.638567	-1.51804	-0.87947
chr1	20693833	20693834	rs76883690	G	T	0.1819	-0.64674	-0.639503	-1.28624
chr1	20733235	20733236	rs10916788	C	G	0.5567	-0.648484	-0.127097	-0.775581
chr1	20756893	20756894	rs912811	G	C	0.6312	0.843446	-1.77135	-0.927902
chr1	20766278	20766279	rs12044712	T	G	0.0686	0.72179	-0.951333	-0.229542
chr1	20767693	20767694	rs74379051	C	T	0.0239	-0.597794	-1.1928	-1.79059
chr1	20775349	20775350	rs11799849	G	A	0.4483	-0.874253	-0.137887	-1.01214
chr1	20809313	20809314	rs11539080	T	G	0.0308	-1.49074	-0.160353	-1.6511
chr1	20813487	20813488	rs1253918	G	T	0.7644	-0.709738	-0.356641	-1.06638
chr1	20838102	20838103	rs139670343	C	T	0.0139	-1.58729	0.407786	-1.17951
chr1	20884828	20884829	rs114152325	A	G	0.0129	0.600418	-0.922202	-0.321784
chr1	20897692	20897693	rs10737450	G	A	0.3459	0.710363	-1.14535	-0.434982
chr1	20902052	20902053	rs569660	G	A	0.1441	1.22148	-1.64235	-0.420864
chr1	20902194	20902195	rs4655224	A	C	0.3459	0.617426	-1.3808	-0.76337
chr1	20913999	20914000	rs34185271	AG	A	0.0716	-1.0225	0.0219758	-1.00052
chr1	20926630	20926631	rs818196	G	C	0.8211	-0.754439	-0.19191	-0.946349
chr1	20945054	20945055	rs1048977	C	T	0.3231	0.713254	-1.36654	-0.65329
chr1	20952968	20952969	rs148033811	G	GC	0.1938	0.618423	-1.27698	-0.658556
chr1	20954499	20954500	rs12566749	G	A	0.0726	0.817	-1.34554	-0.528536
chr1	20966879	20966880	rs3121394	C	T	0.8976	-1.14301	0.368824	-0.77419
chr1	20988756	20988757	rs3753833	G	A	0.2217	-0.960606	-0.900946	-1.86155
chr1	20992605	20992606	rs630484	G	T	0.4095	-0.803065	-0.614954	-1.41802
chr1	21012096	21012097	rs111426636	G	A	0.0497	-0.628975	-0.195023	-0.823998
chr1	21012608	21012609	rs41310420	G	A	0.0109	0.710023	-0.719515	-0.00949205
chr1	21023009	21023010	rs12739943	C	T	0.0964	1.04562	-1.82828	-0.78266
chr1	21023602	21023603	rs590454	T	C	0.4225	-0.586205	-0.842033	-1.42824
chr1	21023695	21023696	rs12407382	G	A	0.0467	-0.675304	-0.42554	-1.10084
chr1	21033638	21033639	rs875015	G	C	0.5984	0.696251	-0.574491	0.12176
chr1	21044218	21044219	rs601392	A	C	0.839	-0.695668	-0.896605	-1.59227
chr1	21052061	21052062	rs79994706	C	T	0.0139	-0.990908	-1.0556	-2.04651
chr1	21059836	21059837	rs61778528	C	T	0.3837	-0.627629	-0.298395	-0.926024
chr1	21120026	21120027	rs13376428	T	C	0.4622	0.776393	-1.26024	-0.483845
chr1	21120591	21120592	rs10916863	C	T	0.6362	-0.84991	-0.231696	-1.08161
chr1	21543458	21543459	rs3026918	C	T	0.1113	-0.922132	0.0879281	-0.834204
chr1	21581978	21581979	rs3026883	C	A	0.3161	0.93329	-1.19048	-0.257192
chr1	21588250	21588251	rs3026875	C	A	0.0268	-0.666356	-0.295087	-0.961443
chr1	21588277	21588278	rs212531	G	A	0.1233	1.60795	-2.54594	-0.937991
chr1	21588602	21588603	rs212532	C	G	0.6103	0.704026	-0.0267724	0.677254
chr1	21588699	21588700	rs114434480	G	A	0.0159	0.860672	-1.1812	-0.320531
chr1	21595610	21595611	rs212548	T	C	0.3002	-1.13683	0.818477	-0.318356
chr1	21617244	21617245	rs213045	G	T	0.2873	0.834913	-0.877118	-0.0422055
chr1	21626341	21626342	rs213055	G	A	0.0845	1.33444	-1.13271	0.201735
chr1	21634976	21634977	rs76450551	G	A	0.1968	-1.22348	0.204241	-1.01924
chr1	21636795	21636796	rs12746281	C	T	0.1044	0.675185	-0.42396	0.251225
chr1	21644118	21644119	rs115430579	G	A	0.0149	0.951035	-1.58166	-0.630621
chr1	21652350	21652351	rs3026825	C	T	0.0577	-0.608679	-0.0105591	-0.619238
chr1	21653685	21653686	rs3026821	C	T	0.0517	-0.931671	0.726795	-0.204875
chr1	21659685	21659686	rs35536249	G	A	0.2634	0.618221	-1.64922	-1.031
chr1	21660761	21660762	rs3026820	T	A	0.4831	-0.884041	0.0356188	-0.848422
chr1	21688418	21688419	rs2796355	G	T	0.5636	-0.617953	-0.211944	-0.829897
chr1	21755141	21755142	rs45527539	C	T	0.1372	0.650591	-0.697641	-0.0470499
chr1	21766761	21766762	rs117626793	C	G	0.0239	-0.871466	0.157708	-0.713758
chr1	21793238	21793239	rs4654942	A	T	0.6034	-1.1347	0.257242	-0.877454
chr1	21794580	21794581	rs7533990	T	C	0.0388	-1.08481	-0.778588	-1.8634
chr1	21795431	21795432	rs35175190	G	GA	0.1909	-0.957949	-0.428984	-1.38693
chr1	21815659	21815660	rs904927	C	T	0.2008	-1.19433	-0.354332	-1.54866
chr1	21830339	21830340	rs56702468	T	C	0.3221	0.799152	-0.77482	0.0243318
chr1	21836339	21836340	rs10917002	C	T	0.0994	0.970391	-1.2221	-0.251713
chr1	21857129	21857130	rs77936121	G	A	0.0298	0.618437	-1.31886	-0.700424
chr1	21862999	21863000	rs1256345	A	C	0.1581	0.650634	-0.985838	-0.335204
chr1	21863132	21863133	rs1697411	A	G	0.9573	0.604059	-0.387017	0.217041
chr1	21864062	21864063	rs11586977	C	A	0.0606	-0.591887	-0.36437	-0.956257
chr1	21866563	21866564	rs7547128	G	A	0.4543	0.773548	-0.944485	-0.170938
chr1	21873001	21873002	rs12141569	C	T	0.498	-0.993111	0.361365	-0.631746
chr1	21873260	21873261	rs115626047	C	T	0.0209	0.856422	-1.29347	-0.437049
chr1	21873392	21873393	rs141816121	G	A	0.0159	-0.688446	-0.710835	-1.39928
chr1	21875702	21875703	rs34771761	AC	A	0.1143	0.741208	-1.21385	-0.472647
chr1	21901456	21901457	rs1697404	A	G	0.8946	-0.7091	0.378462	-0.330638
chr1	21901557	21901558	rs3767142	G	A	0.2575	0.70723	-1.00652	-0.299292
chr1	21910710	21910711	rs34239727	G	A	0.2127	-0.647536	-0.206153	-0.853689
chr1	21911864	21911865	rs55881067	G	A	0.4851	0.658504	-1.84709	-1.18858
chr1	21921989	21921990	rs829393	C	G	0.7883	-0.798063	-0.807185	-1.60525
chr1	21922240	21922241	rs75042787	A	G	0.0348	0.645061	-1.27993	-0.634867
chr1	21925409	21925410	rs138106551	G	A	0.0129	0.743971	0.12436	0.868331
chr1	21925602	21925603	rs10917023	A	G	0.0656	-0.785788	-0.222609	-1.0084
chr1	21945388	21945389	rs12143471	C	T	0.1322	-0.588746	-1.36601	-1.95475
chr1	21945613	21945614	rs115394639	C	T	0.0626	-0.909475	-0.282956	-1.19243
chr1	21974544	21974545	rs79843678	G	A	0.0924	0.91632	-0.765886	0.150434
chr1	21978464	21978465	rs181939530	G	A	0.1312	0.832158	-1.00203	-0.169873
chr1	21983253	21983254	rs829405	C	T	0.501	1.02501	-1.74018	-0.715166
chr1	21992599	21992600	rs710948	A	G	0.9573	0.75951	-1.22054	-0.461032
chr1	21996030	21996031	rs72660360	G	A	0.0149	1.01641	-1.81064	-0.79423
chr1	21996650	21996651	rs114741603	C	T	0.0577	0.638206	-1.49515	-0.856939
chr1	22007442	22007443	rs72660363	C	T	0.1292	0.887931	-1.35474	-0.466806
chr1	22095139	22095140	rs202119403	CTTCAAGCCCCACCCCT	C	0.0179	-0.80366	-0.797417	-1.60108
chr1	22109795	22109796	rs35745827	C	T	0.1054	-0.924589	-0.873967	-1.79856
chr1	22110417	22110418	rs884726	T	C	0.7465	0.607296	-0.878598	-0.271303
chr1	22145212	22145213	rs67187520	C	A	0.0169	0.875873	-1.4835	-0.607629
chr1	22157461	22157462	rs560834288	T	G	0.0676	0.848044	-0.973854	-0.125811
chr1	22169682	22169683	rs74060196	G	A	0.0189	-1.43052	-0.22357	-1.65409
chr1	22225742	22225743	rs2445142	G	C	0.3201	0.685867	-0.45019	0.235677
chr1	22231155	22231156	rs143551401	G	A	0.0179	-0.792077	-0.784328	-1.57641
chr1	22231827	22231828	rs34122101	A	AT	0.2793	1.0151	0.960919	1.97602
chr1	22232551	22232552	rs11581438	C	A	0.0199	-0.619719	-0.946772	-1.56649
chr1	22233222	22233223	rs72508718	G	GT	0.329	-0.788109	-0.858472	-1.64658
chr1	22241690	22241691	rs113482179	G	GTGCCCAC	0.9781	-0.775551	0.432051	-0.3435
chr1	22249835	22249836	rs9426677	C	T	0.2247	-0.691573	-0.792165	-1.48374
chr1	22254087	22254088	rs112663661	C	T	0.0129	1.16801	-1.558	-0.38999
chr1	22259049	22259050	rs4654997	A	G	0.9881	-0.799503	0.169986	-0.629517
chr1	22269484	22269485	rs151077008	T	C	0.0129	-0.682552	0.0512595	-0.631292
chr1	22273291	22273292	rs11576772	C	T	0.1213	-0.955931	-0.275432	-1.23136
chr1	22273647	22273648	rs4077296	G	T	0.6481	0.957839	-1.53939	-0.581552
chr1	22281478	22281479	rs10917071	G	A	0.8738	-0.761756	-0.514595	-1.27635
chr1	22281812	22281813	rs12748739	C	G	0.2167	-0.977666	-0.677367	-1.65503
chr1	22283734	22283735	rs10917076	C	T	0.6312	0.702523	-1.35029	-0.647766
chr1	22290428	22290429	rs72662484	C	T	0.2107	-0.971102	-0.670198	-1.6413
chr1	22290622	22290623	rs35806133	C	T	0.2107	1.87462	-1.44081	0.433808
chr1	22301418	22301419	rs12029994	C	T	0.3171	-0.724872	-0.198338	-0.92321
chr1	22307357	22307358	rs7528300	C	G	0.9722	0.84317	-2.02331	-1.18014
chr1	22308177	22308178	rs7553024	G	A	0.9722	0.661763	-0.787435	-0.125672
chr1	22331570	22331571	rs4317779	G	C	0.9533	-0.682197	-0.425261	-1.10746
chr1	22351325	22351326	rs3754505	G	C	0.2773	-0.838034	-0.273385	-1.11142
chr1	22352039	22352040	rs2255282	G	T	0.508	1.59714	-1.96906	-0.371917
chr1	22352715	22352716	rs114095512	C	T	0.0139	0.729962	-0.544717	0.185245
chr1	22366674	22366675	rs74821829	T	A	0.0388	-0.761876	-0.58416	-1.34604
chr1	22372788	22372789	rs143252229	G	A	0.0109	1.16809	-1.4231	-0.255003
chr1	22378879	22378880	rs3754496	C	A	0.16	-0.60696	-0.476852	-1.08381
chr1	22379087	22379088	rs2473325	G	A	0.669	-0.697354	-0.385512	-1.08287
chr1	22379647	22379648	rs16860629	C	T	0.0457	-0.705609	-0.0458978	-0.751507
chr1	22432418	22432419	rs4655022	T	C	0.7515	-0.907291	-0.680398	-1.58769
chr1	22446767	22446768	rs34228276	G	A	0.0229	0.628086	-0.879609	-0.251523
chr1	22470006	22470007	rs199815800	C	CCT	0.5795	-0.788385	-0.549158	-1.33754
chr1	22470114	22470115	rs12135916	G	A	0.7286	-0.984458	-0.750183	-1.73464
chr1	22505741	22505742	rs2982284	G	C	0.7674	-0.786868	-0.723837	-1.5107
chr1	22556223	22556224	rs12751606	T	C	0.0358	-0.730671	-0.367337	-1.09801
chr1	22556239	22556240	rs372952132	T	AC	0.5527	0.671392	-0.830429	-0.159038
chr1	22556705	22556706	rs6670439	C	T	0.2416	0.900022	-2.08605	-1.18603
chr1	22556743	22556744	rs10917181	A	T	0.2435	-0.694257	0.165342	-0.528915
chr1	22619945	22619946	rs10917195	T	C	0.8817	-0.81728	0.602352	-0.214929
chr1	22690764	22690765	rs4233287	T	C	0.6054	1.04619	-1.32862	-0.282433
chr1	22699228	22699229	rs147788101	C	T	0.0368	0.662276	-1.63736	-0.975084
chr1	22710876	22710877	rs34963268	G	C	0.164	-0.668184	0.0625473	-0.605637
chr1	22741117	22741118	rs7513392	G	A	0.1233	1.09256	-1.74584	-0.653279
chr1	22743369	22743370	rs1320599	G	C	0.8032	0.636762	-0.679568	-0.0428059
chr1	22746903	22746904	rs10917228	G	A	0.4274	-0.702218	-0.647241	-1.34946
chr1	22774265	22774266	rs1890775	C	T	0.2356	0.850041	-0.690444	0.159597
chr1	22797155	22797156	rs12028744	T	C	0.0239	-0.660521	0.00236618	-0.658155
chr1	22797834	22797835	rs10753538	G	A	0.2336	0.879643	-1.24553	-0.365887
chr1	22821843	22821844	rs78296352	G	T	0.0288	0.626225	-0.918978	-0.292753
chr1	22891964	22891965	rs209735	C	T	0.9632	-0.732311	-1.38421	-2.11652
chr1	22906780	22906781	rs113358893	G	A	0.0835	-1.05451	-1.40147	-2.45598
chr1	22962652	22962653	rs2986658	C	T	0.3966	-0.780981	-0.31175	-1.09273
chr1	22968424	22968425	rs4655085	G	A	0.0984	-0.95954	-0.213417	-1.17296
chr1	22979654	22979655	rs291990	T	G	0.4781	0.68272	-0.899519	-0.216799
chr1	23004530	23004531	rs75837320	A	G	0.0199	-0.796319	0.985384	0.189065
chr1	23031475	23031476	rs12092088	A	G	0.0596	-0.586785	0.103193	-0.483593
chr1	23121396	23121397	rs35360906	T	G	0.0348	-1.19454	0.323706	-0.870831
chr1	23123375	23123376	rs1866791	T	C	0.832	-0.692791	-0.310024	-1.00282
chr1	23141652	23141653	rs4655120	A	G	0.166	1.32454	-1.57022	-0.245679
chr1	23141695	23141696	rs55880172	T	G	0.83	-0.655566	-0.894446	-1.55001
chr1	23142052	23142053	rs35801029	C	T	0.7117	-0.593122	-0.0461163	-0.639238
chr1	23142350	23142351	rs2165332	C	T	0.827	-0.608748	-0.0971317	-0.70588
chr1	23168058	23168059	rs10917318	C	T	0.1819	-0.87504	-0.3128	-1.18784
chr1	23168316	23168317	rs28649787	C	G	0.5616	-1.02792	0.264802	-0.763123
chr1	23171633	23171634	rs61768228	G	A	0.2068	-0.726474	0.219567	-0.506907
chr1	23183005	23183006	rs114809809	C	T	0.0219	1.31959	-0.587898	0.731697
chr1	23197318	23197319	rs2176274	C	T	0.0686	0.602013	-0.590896	0.0111171
chr1	23268063	23268064	rs2176271	A	T	0.3668	-0.761538	0.173392	-0.588145
chr1	23346648	23346649	rs148150162	G	A	0.0119	0.675724	-0.957782	-0.282058
chr1	23410720	23410721	rs505938	A	T	0.829	-0.630517	-0.423261	-1.05378
chr1	23419373	23419374	rs3765407	G	T	0.828	-1.1564	0.0790974	-1.0773
chr1	23477806	23477807	rs12046218	G	C	0.164	0.790901	-0.877156	-0.0862556
chr1	23494288	23494289	rs61781469	A	T	0.1093	1.44769	-0.384248	1.06344
chr1	23494639	23494640	rs540962564	A	C	0.0199	0.870426	-1.5083	-0.637877
chr1	23504794	23504795	rs2806561	A	G	0.4473	-0.635179	-0.355928	-0.991106
chr1	23695274	23695275	rs680386	G	T	0.1889	1.11965	-1.16558	-0.0459253
chr1	23696151	23696152	rs665977	G	A	0.9145	0.873725	-0.689377	0.184347
chr1	23720821	23720822	rs61777153	G	A	0.172	1.70698	-0.788837	0.918142
chr1	23721595	23721596	rs12130159	G	A	0.0298	1.07713	-0.999755	0.0773792
chr1	23729541	23729542	rs3973655	C	T	0.0288	-0.669908	0.378412	-0.291496
chr1	23730503	23730504	rs61777156	C	A	0.0149	-0.602628	0.224622	-0.378006
chr1	23748783	23748784	rs11588134	T	C	0.4672	0.597713	-0.22562	0.372093
chr1	23748851	23748852	rs11589432	G	C	0.4672	-0.640737	-0.819703	-1.46044
chr1	23795719	23795720	rs61778887	G	A	0.1451	-0.964269	-0.984987	-1.94926
chr1	23805627	23805628	rs140071272	G	C	0.0437	-0.774633	-0.0696838	-0.844317
chr1	23811060	23811061	rs12727881	C	T	0.6879	-0.676556	-0.391223	-1.06778
chr1	23818641	23818642	rs12119419	C	G	0.0437	-2.86127	1.90085	-0.960424
chr1	23833931	23833932	rs111903743	T	A	0.0567	0.724641	-1.55333	-0.828688
chr1	23834437	23834438	rs41300116	T	C	0.0696	0.859325	-0.378641	0.480683
chr1	23871128	23871129	rs12726484	G	C	0.1759	-0.601508	0.0669152	-0.534593
chr1	23875265	23875266	rs6668991	G	A	0.0696	0.652254	-0.916755	-0.264501
chr1	23881309	23881310	rs2811937	G	A	0.6302	0.623332	-0.351188	0.272143
chr1	23894577	23894578	rs7514535	C	T	0.4781	-1.32724	0.0735758	-1.25367
chr1	23902415	23902416	rs2811946	A	C	0.5517	-1.54706	-0.0843212	-1.63138
chr1	23912518	23912519	rs72870520	C	T	0.0239	0.851559	-1.02405	-0.172488
chr1	23965311	23965312	rs146687637	T	C	0.0109	1.00492	-0.315643	0.68928
chr1	23965516	23965517	rs61777309	G	A	0.2515	-1.28521	-0.196556	-1.48177
chr1	24018223	24018224	rs3753270	C	T	0.1779	0.648541	-1.43665	-0.788107
chr1	24018952	24018953	rs78796509	T	C	0.0109	-0.94361	-0.896577	-1.84019
chr1	24023131	24023132	rs4649111	G	A	0.4374	0.590133	-1.06462	-0.474489
chr1	24045819	24045820	rs519202	C	T	0.6262	1.16778	-1.01776	0.150027
chr1	24071295	24071296	rs140880078	A	G	0.0159	-1.28857	0.535719	-0.752847
chr1	24085912	24085913	rs571938377	A	AT	0.0129	-1.48005	1.77759	0.297539
chr1	24095575	24095576	rs140569782	T	C	0.0199	0.773713	-1.6428	-0.869087
chr1	24117834	24117835	rs2502985	G	A	0.9225	-0.686839	-0.929017	-1.61586
chr1	24165247	24165248	rs58035855	G	C	0.4125	-0.762962	-0.176686	-0.939648
chr1	24175762	24175763	rs12404321	A	G	0.0885	-1.40738	0.495717	-0.911661
chr1	24192199	24192200	rs34902309	A	G	0.4225	-0.93807	-0.128026	-1.0661
chr1	24192378	24192379	rs74937660	G	C	0.0885	0.720555	-1.27415	-0.553595
chr1	24193964	24193965	rs3003621	T	C	0.0905	-0.742379	-0.450173	-1.19255
chr1	24195248	24195249	rs3003622	A	G	0.0905	-0.721668	-0.835624	-1.55729
chr1	24195522	24195523	rs6664030	A	G	0.9095	0.625605	-0.908799	-0.283194
chr1	24200902	24200903	rs2229586	G	C	0.5865	0.626194	-1.71909	-1.0929
chr1	24200982	24200983	rs2229583	C	T	0.5885	-0.831972	-0.486226	-1.3182
chr1	24219373	24219374	rs6424130	T	C	0.829	0.826878	-1.46655	-0.639674
chr1	24256825	24256826	rs558442281	C	A	0.0229	1.01216	-1.87443	-0.86227
chr1	24256864	24256865	rs554436069	A	C	0.0547	-0.976719	-1.17747	-2.15419
chr1	24306620	24306621	rs7523052	G	T	0.0596	0.653548	-1.39025	-0.736701
chr1	24374108	24374109	rs72648512	G	A	0.0129	-0.650342	-0.145783	-0.796125
chr1	24379403	24379404	rs4649160	C	T	0.7296	-0.736305	-0.540549	-1.27685
chr1	24379649	24379650	rs10633618	C	CTATT	0.7296	-0.941815	0.0285207	-0.913294
chr1	24393941	24393942	rs11580700	C	T	0.0109	-0.776063	-0.084668	-0.860731
chr1	24397472	24397473	rs34631595	G	GC	0.1879	0.835768	-0.433288	0.40248
chr1	24407133	24407134	rs4649178	C	T	0.4423	-0.806184	0.67437	-0.131813
chr1	24465308	24465309	rs10794642	C	T	0.3628	-0.599908	-0.316048	-0.915956
chr1	24476369	24476370	rs4330872	C	T	0.8688	-0.808293	-0.631392	-1.43969
chr1	24476710	24476711	rs10465895	T	A	0.8688	0.771205	-0.639392	0.131813
chr1	24484746	24484747	rs1538632	A	G	0.1978	0.721855	-1.40249	-0.680639
chr1	24513767	24513768	rs4090311	G	A	0.8539	-0.971557	-0.17389	-1.14545
chr1	24522219	24522220	rs4649204	G	C	0.9125	0.83528	-0.359849	0.475431
chr1	24533121	24533122	rs149890860	T	C	0.0119	-0.761171	-0.688204	-1.44938
chr1	24533293	24533294	rs946663	A	C	0.5815	1.4734	-1.64581	-0.172416
chr1	24562693	24562694	rs61772956	G	A	0.2157	1.1481	-2.36125	-1.21315
chr1	24581492	24581493	rs11249057	G	A	0.3489	0.594042	-0.946888	-0.352846
chr1	24627898	24627899	rs77455275	C	T	0.0189	-0.63186	-0.123426	-0.755286
chr1	24695748	24695749	rs35671964	C	G	0.3549	-2.14108	0.976833	-1.16424
chr1	24712991	24712992	rs510614	C	G	0.6272	-0.711904	-0.0918112	-0.803715
chr1	24754405	24754406	rs2235553	T	A	0.2793	0.633303	-0.936155	-0.302852
chr1	24754519	24754520	rs2223503	A	G	0.3509	0.77094	-1.34986	-0.578918
chr1	24764688	24764689	rs1008485	C	T	0.2863	-0.736847	-0.023608	-0.760455
chr1	24764743	24764744	rs138075061	G	A	0.0199	-0.994654	-0.445448	-1.4401
chr1	24765536	24765537	rs4648862	G	T	0.5179	-0.815769	-0.118986	-0.934755
chr1	24777515	24777516	rs141958489	A	T	0.0278	-0.604532	-0.0154139	-0.619945
chr1	24853662	24853663	rs371968521	A	ATGGTGTGT	0.2555	1.44229	-2.00815	-0.565854
chr1	24854021	24854022	rs110672	T	A	0.4592	0.834688	-1.39376	-0.55907
chr1	24873674	24873675	rs76321800	G	T	0.0308	-0.616602	-0.274994	-0.891596
chr1	24882926	24882927	rs72652598	C	T	0.0994	-0.797525	-0.738117	-1.53564
chr1	24894996	24894997	rs1929301	G	A	0.2903	-0.635218	-0.95924	-1.59446
chr1	24902833	24902834	rs11808054	C	G	0.0785	0.60645	-1.10886	-0.502408
chr1	24903004	24903005	rs56030698	A	G	0.0895	-0.802965	-0.651028	-1.45399
chr1	24903045	24903046	rs7541957	A	G	0.0775	-1.39216	-0.597367	-1.98953
chr1	24914031	24914032	rs4648999	A	T	0.5517	-1.19319	-0.588178	-1.78136
chr1	24926265	24926266	rs61624893	C	A	0.3171	-0.718302	-0.807913	-1.52622
chr1	25015113	25015114	rs16829923	G	A	0.0338	1.07238	-1.41609	-0.343711
chr1	25029117	25029118	rs7543969	T	C	0.6421	-1.17745	-0.163954	-1.3414
chr1	25031586	25031587	rs187083534	G	A	0.0129	0.591204	-0.852808	-0.261603
chr1	25032604	25032605	rs4649015	C	T	0.6431	-0.671324	0.437314	-0.23401
chr1	25046828	25046829	rs111681564	G	A	0.0447	0.59873	-1.63016	-1.03143
chr1	25073019	25073020	rs4649017	T	C	0.3678	-1.22564	0.0622816	-1.16336
chr1	25080521	25080522	rs7525139	C	T	0.2952	-0.762122	-0.784373	-1.54649
chr1	25140824	25140825	rs3890756	A	G	0.2982	0.712178	-1.09924	-0.387061
chr1	25155184	25155185	rs4606258	T	C	0.3022	0.625971	-0.273774	0.352197
chr1	25155187	25155188	rs4351587	G	C	0.2992	-0.707016	0.061801	-0.645215
chr1	25174415	25174416	rs112441123	G	T	0.0417	0.750863	-1.09902	-0.348159
chr1	25175245	25175246	rs4648879	A	G	0.7018	1.25488	-1.38156	-0.126678
chr1	25189376	25189377	rs4072968	T	C	0.34	-0.885683	0.254338	-0.631345
chr1	25199281	25199282	rs6686594	T	C	0.496	-0.626936	-0.122498	-0.749434
chr1	25213045	25213046	rs11249193	T	C	0.162	0.772432	-0.461937	0.310494
chr1	25213236	25213237	rs4649035	C	T	0.9742	-1.35238	0.338868	-1.01352
chr1	25213378	25213379	rs12027805	G	T	0.1978	1.20825	-1.73852	-0.530262
chr1	25241089	25241090	rs2282719	A	C	0.5567	0.714771	-1.01764	-0.30287
chr1	25273287	25273288	rs876109	T	C	0.6362	-1.00637	0.127978	-0.878393
chr1	25293215	25293216	rs7414934	A	C	0.5437	-0.790217	-0.167358	-0.957576
chr1	25293236	25293237	rs11249213	G	A	0.5437	0.672027	-1.93212	-1.2601
chr1	25297216	25297217	rs11249216	G	T	0.1223	-0.686529	-0.468296	-1.15482
chr1	25297366	25297367	rs11803573	G	A	0.1223	0.677641	-1.48434	-0.806697
chr1	25321596	25321597	rs9438878	A	G	0.0924	0.648054	-0.762592	-0.114538
chr1	25321753	25321754	rs4649041	C	G	0.1521	-0.672819	-0.0367839	-0.709603
chr1	25321764	25321765	rs9438879	C	T	0.0924	-0.874302	0.909562	0.0352598
chr1	25330458	25330459	rs12144291	G	A	0.0507	-1.74415	1.5162	-0.227947
chr1	25333428	25333429	rs11249236	T	C	0.0507	0.689891	-1.39508	-0.705186
chr1	25348949	25348950	rs71014329	G	GT	0.6054	-0.773136	-0.259212	-1.03235
chr1	25355367	25355368	rs78712131	C	T	0.0507	-0.765797	-0.490926	-1.25672
chr1	25363706	25363707	rs453532	A	C	0.7187	0.743508	-1.64102	-0.897511
chr1	25395758	25395759	rs380149	G	A	0.6153	0.843239	-0.770436	0.0728032
chr1	25395878	25395879	rs12126466	G	A	0.163	0.774984	-0.907605	-0.132622
chr1	25421616	25421617	rs6657249	A	C,T	0.506	0.624215	-0.405321	0.218894
chr1	25444041	25444042	rs2660363	T	C	0.0129	-0.630574	0.201032	-0.429543
chr1	25473289	25473290	rs2143163	T	C	0.7416	1.2135	-0.986549	0.226947
chr1	25495057	25495058	rs6600264	T	C	0.2525	-0.595176	-0.0803247	-0.675501
chr1	25509520	25509521	rs5773123	CG	C	0.2714	-0.733106	0.029186	-0.70392
chr1	25566816	25566817	rs149332972	G	C	0.0219	-0.947582	0.201245	-0.746337
chr1	25622198	25622199	rs182346769	G	A	0.0656	1.20576	-0.769949	0.435809
chr1	25622221	25622222	rs201512625	A	G	0.0258	-0.620615	-0.452369	-1.07298
chr1	25622287	25622288	rs2986163	T	A	0.5249	-0.637702	-0.334759	-0.972461
chr1	25627065	25627066	rs2986167	C	G	0.2286	1.02227	-1.27299	-0.250723
chr1	25732547	25732548	rs28513325	G	A	0.9722	0.633001	-1.13442	-0.501415
chr1	25756795	25756796	rs145575386	G	T	0.0159	-0.718512	0.303398	-0.415114
chr1	25875919	25875920	rs72873721	C	G	0.0547	-1.04023	-0.542278	-1.58251
chr1	25883612	25883613	rs146180707	G	C	0.0119	-0.629909	0.371212	-0.258697
chr1	25885527	25885528	rs61776821	G	A	0.504	-0.607614	-0.925485	-1.5331
chr1	25967586	25967587	rs2143102	T	C	0.9533	1.15975	-0.308758	0.850989
chr1	26026278	26026279	rs74785636	C	A	0.1581	-0.665893	-0.539372	-1.20526
chr1	26027366	26027367	rs146713535	G	A	0.0129	-0.796451	0.0126548	-0.783796
chr1	26040513	26040514	rs2744761	T	G	0.1093	0.682277	-1.08572	-0.403447
chr1	26053996	26053997	rs1267223	C	G	0.0606	1.04829	-1.21136	-0.163076
chr1	26063042	26063043	rs2744773	G	A	0.0527	1.4317	-1.87915	-0.447448
chr1	26098106	26098107	rs2072747	G	A	0.6571	0.85019	-0.512292	0.337898
chr1	26098332	26098333	rs807264	G	A	0.8181	0.836942	-0.875861	-0.0389187
chr1	26121035	26121036	rs807246	T	C	0.7883	-0.752263	0.566157	-0.186106
chr1	26123212	26123213	rs74644097	G	A	0.0199	0.856429	-1.34474	-0.488313
chr1	26123749	26123750	rs11589618	G	C	0.5258	0.71505	-0.695429	0.0196203
chr1	26124679	26124680	rs151143753	G	A	0.0129	-0.671631	-0.0661864	-0.737817
chr1	26127019	26127020	rs13373825	G	A	0.7893	0.725024	-0.914167	-0.189143
chr1	26127201	26127202	rs6676342	T	G	0.7893	-0.882407	-0.718769	-1.60118
chr1	26132322	26132323	rs12741078	C	G	0.7873	0.601703	-0.688161	-0.0864584
chr1	26132540	26132541	rs115183232	C	T	0.0388	-0.90971	1.07372	0.164015
chr1	26134823	26134824	rs542119640	G	GC	0.7803	1.21179	-1.45889	-0.247102
chr1	26134824	26134825	rs561304535;rs563589400	G	C,GCC	0.7803	2.28595	-1.59272	0.693233
chr1	26137816	26137817	rs74753273	G	T	0.0348	0.939705	-1.34945	-0.409741
chr1	26175517	26175518	rs2745538	T	C	0.2256	0.617635	-1.53424	-0.916601
chr1	26196965	26196966	rs200583085	ACT	A	0.0109	-0.80929	-0.258368	-1.06766
chr1	26324107	26324108	rs933078	C	A	0.668	0.890854	-2.06058	-1.16972
chr1	26324519	26324520	rs11247841	T	C	0.6551	0.818418	-0.461581	0.356837
chr1	26344476	26344477	rs3008244	G	A	0.8608	-0.777581	-0.675598	-1.45318
chr1	26348048	26348049	rs4659362	G	A	0.3032	0.918537	-1.74581	-0.827269
chr1	26362000	26362001	rs6665062	C	T	0.1879	-0.69777	-0.79442	-1.49219
chr1	26393346	26393347	rs61775417	C	G	0.1799	0.975181	-1.06499	-0.0898044
chr1	26394996	26394997	rs3008226	A	C	0.1859	0.707681	-1.01702	-0.309339
chr1	26397285	26397286	rs7520344	C	T	0.1799	1.24745	-1.50713	-0.259673
chr1	26398980	26398981	rs79659454	C	T	0.0388	-0.64538	-0.303963	-0.949342
chr1	26399229	26399230	rs11247854	G	A	0.6988	-1.07744	0.840913	-0.236527
chr1	26402620	26402621	rs3008232	A	G	0.1849	1.2119	-1.10213	0.109766
chr1	26409800	26409801	rs55912918	C	T	0.1819	-0.614687	-0.104163	-0.71885
chr1	26411970	26411971	rs12067677	C	T	0.1849	-0.727439	-0.38862	-1.11606
chr1	26437261	26437262	rs61776582	A	C	0.1789	-1.03872	-0.26527	-1.30399
chr1	26455811	26455812	rs61776616	C	T	0.1789	-1.34561	-0.68996	-2.03557
chr1	26482410	26482411	rs75204979	G	A	0.2008	0.733436	-1.4933	-0.759863
chr1	26485516	26485517	rs3748854	G	C	0.3121	0.612989	-0.383267	0.229721
chr1	26498250	26498251	rs41305771	G	A	0.0229	1.71636	-2.41532	-0.698961
chr1	26504696	26504697	rs2783706	A	G	0.3012	-0.66988	-0.05548	-0.72536
chr1	26504755	26504756	rs2783631	G	A	0.3012	-0.595497	-0.775643	-1.37114
chr1	26508292	26508293	rs3819033	G	A	0.1004	-0.599607	0.114902	-0.484705
chr1	26527254	26527255	rs12145714	G	A	0.2455	-1.0368	0.507422	-0.52938
chr1	26527259	26527260	rs12120359	A	G	0.2455	-0.628581	-0.438455	-1.06704
chr1	26527782	26527783	rs6703730	G	A	0.331	0.796224	-1.19855	-0.402323
chr1	26527809	26527810	rs1889756	G	A	0.2614	-0.600996	-0.570154	-1.17115
chr1	26527950	26527951	rs6657616	G	A	0.2654	-0.900541	0.670805	-0.229736
chr1	26545246	26545247	rs34533129	A	G	0.6292	0.770606	-1.06324	-0.292636
chr1	26545276	26545277	rs6697436	T	C	0.1262	0.802562	-1.60921	-0.806651
chr1	26561219	26561220	rs6698557	G	C	0.171	-0.710092	-0.346098	-1.05619
chr1	26580936	26580937	rs4659416	T	G	0.6322	-1.23408	-0.781156	-2.01524
chr1	26583680	26583681	rs7513945	T	C	0.9304	-1.16997	-0.682283	-1.85225
chr1	26602250	26602251	rs12732295	C	T	0.6322	0.917382	-0.785156	0.132226
chr1	26602566	26602567	rs34753989	TGA	T	0.1889	-0.714801	0.0067	-0.708101
chr1	26606290	26606291	rs61775082	C	T	0.1431	1.48632	-1.16775	0.318562
chr1	26607004	26607005	rs34824071	C	A	0.2982	-1.06045	-0.448265	-1.50872
chr1	26607122	26607123	rs12759434	C	T	0.6282	-0.809137	-0.077683	-0.88682
chr1	26608648	26608649	rs12750420	G	A	0.3032	-0.978748	-0.392155	-1.3709
chr1	26612041	26612042	rs11247898	A	G	0.9304	-0.790518	-0.0370417	-0.827559
chr1	26613703	26613704	rs12563057	G	A	0.0746	-0.827449	1.21083	0.383376
chr1	26644697	26644698	rs12090258	C	T	0.1899	-0.799283	-0.427714	-1.227
chr1	26647948	26647949	rs7416513	G	C	0.7366	-0.907078	0.16432	-0.742758
chr1	26662903	26662904	rs72649360	C	T	0.3022	0.667056	-0.804592	-0.137536
chr1	26663361	26663362	rs10751735	C	T	0.5308	-0.588421	-0.186661	-0.775082
chr1	26686836	26686837	rs11806568	C	A	0.1899	-0.605991	-1.1361	-1.74209
chr1	26697397	26697398	rs61776528	T	C	0.1004	0.799624	-0.694324	0.1053
chr1	26722653	26722654	rs71514271	C	G	0.5547	-0.649376	-0.912451	-1.56183
chr1	26723143	26723144	rs77533714	A	G	0.3628	0.825351	-1.43983	-0.614474
chr1	26743902	26743903	rs6683792	C	T	0.3131	0.98434	-1.01702	-0.0326831
chr1	26758601	26758602	rs3811462	T	C	0.7823	-0.847992	-0.515836	-1.36383
chr1	26759148	26759149	rs3811461	A	G	0.2346	-1.1476	0.22811	-0.919491
chr1	26835530	26835531	rs192621680	C	T	0.2614	-0.918539	-1.16259	-2.08113
chr1	26868636	26868637	rs56263909	G	C	0.3091	-0.688504	-0.238789	-0.927292
chr1	26872553	26872554	rs12723936	A	G	0.2833	0.718585	-0.510034	0.208551
chr1	26901188	26901189	rs41303625	A	G	0.0199	0.718691	-0.851261	-0.132569
chr1	26929001	26929002	rs17162257	T	G	0.0278	0.783805	-1.15392	-0.370112
chr1	27004259	27004260	rs148577969	G	A	0.0258	-0.688143	0.730336	0.0421927
chr1	27127352	27127353	rs150068740	C	T	0.0298	0.681649	-0.746267	-0.0646184
chr1	27177906	27177907	rs17162316	C	G	0.1362	-0.796023	-0.407682	-1.20371
chr1	27216668	27216669	rs11555809	G	A	0.0755	1.54542	-1.82893	-0.283513
chr1	27234487	27234488	rs1187950	C	T	0.0348	0.684561	-0.792856	-0.108295
chr1	27287715	27287716	rs60340200	A	G	0.0755	0.610338	-1.14761	-0.537273
chr1	27290649	27290650	rs72651568	T	G	0.3867	-0.879923	-0.411953	-1.29188
chr1	27293355	27293356	rs17162387	T	G	0.0765	-0.630437	-1.25008	-1.88052
chr1	27339102	27339103	rs4970471	G	T	0.17	-0.814519	-0.398562	-1.21308
chr1	27393393	27393394	rs75729933	G	A	0.0149	0.843416	-1.56321	-0.719793
chr1	27445284	27445285	rs35565098	T	C	0.3469	-0.642167	0.488493	-0.153675
chr1	27445459	27445460	rs36148530	G	T	0.341	0.657222	-0.443132	0.214089
chr1	27471886	27471887	rs76692181	T	C	0.0169	-0.999498	0.377964	-0.621534
chr1	27618970	27618971	rs77677906	C	A	0.0219	1.0746	-0.880664	0.193936
chr1	27677929	27677930	rs12561870	G	A	0.0239	-0.610807	-0.285249	-0.896057
chr1	27687465	27687466	rs35659744	G	T	0.2684	0.72411	-0.967859	-0.243749
chr1	27692650	27692651	rs189532370	C	A	0.0139	0.86035	-1.8511	-0.990746
chr1	27693602	27693603	rs111620626	G	T	0.0298	1.26806	-0.875694	0.392366
chr1	27709857	27709858	rs734725	G	T	0.1203	0.706352	-1.43279	-0.726442
chr1	27719091	27719092	rs115072736	A	T	0.1223	-0.787989	0.538799	-0.249191
chr1	27730257	27730258	rs2504763	G	C	0.1352	-1.22868	-0.00058986	-1.22927
chr1	27730274	27730275	rs202049580	CAGG	C	0.0169	0.65562	-1.21415	-0.55853
chr1	27819121	27819122	rs574161061	T	G	0.0119	-0.592883	-0.601249	-1.19413
chr1	27840345	27840346	rs113571009	C	T	0.1093	-1.12407	-0.758739	-1.88281
chr1	27850074	27850075	rs74606343	T	C	0.1163	0.666641	-0.848418	-0.181778
chr1	27899402	27899403	rs57467219	A	C	0.0159	-0.970586	-0.558785	-1.52937
chr1	27908378	27908379	rs72886318	G	A	0.0159	0.807752	-0.644534	0.163218
chr1	27916654	27916655	rs36126726	GC	G	0.0169	0.651192	-0.586118	0.0650744
chr1	27933023	27933024	rs11809483	T	C	0.0159	0.883544	-1.22498	-0.341438
chr1	27958181	27958182	rs114357739	T	C	0.0179	-0.749591	0.559069	-0.190522
chr1	27958238	27958239	rs79004605	G	T	0.0179	0.830135	-1.00557	-0.175435
chr1	27958338	27958339	rs34806307	C	T	0.0895	0.630381	-0.271637	0.358745
chr1	27982006	27982007	rs116378094	C	T	0.0189	-0.68997	-0.262809	-0.952779
chr1	27982368	27982369	rs4430355	G	A	0.9751	0.678385	-0.747407	-0.0690218
chr1	27995516	27995517	rs61787101	C	T	0.9751	-1.08956	-0.954734	-2.04429
chr1	27995528	27995529	rs112472381	C	T	0.5885	-1.17041	-1.00904	-2.17945
chr1	28082339	28082340	rs76303419	C	T	0.0189	0.701242	-1.15085	-0.449608
chr1	28154559	28154560	rs12028063	G	C	0.0189	0.811597	-1.92266	-1.11106
chr1	28199368	28199369	rs61787159	C	T	0.1034	0.849045	-1.00054	-0.151493
chr1	28213844	28213845	rs114621012	G	T	0.0179	0.715699	-1.01744	-0.301746
chr1	28261494	28261495	rs45461292	C	T	0.0169	-0.759045	-0.30683	-1.06588
chr1	28286476	28286477	rs12406711	C	T	0.0239	-0.966034	-0.13714	-1.10317
chr1	28287254	28287255	rs148796891	C	T	0.0129	-0.709279	-0.916044	-1.62532
chr1	28287263	28287264	rs78664461	C	G	0.0209	-0.588927	0.0485338	-0.540393
chr1	28390796	28390797	rs61216784	A	G	0.0268	-1.28512	1.22613	-0.0589908
chr1	28402923	28402924	rs72658361	C	T	0.2535	-0.787774	0.382561	-0.405212
chr1	28415017	28415018	rs2050788	T	C	0.0278	-0.636814	0.52286	-0.113955
chr1	28417902	28417903	rs76890118	G	A	0.0567	-1.69554	0.894411	-0.80113
chr1	28422846	28422847	rs2989472	C	T	0.6093	0.899677	0.455508	1.35518
chr1	28426016	28426017	rs111766400	G	A	0.0189	0.622314	-0.984208	-0.361893
chr1	28466265	28466266	rs146893812	C	T	0.0427	-1.2204	-0.867248	-2.08765
chr1	28523704	28523705	rs788634	G	A	0.2883	0.740525	-0.634182	0.106343
chr1	28536210	28536211	rs3767306	G	A	0.2425	-0.609782	-0.597386	-1.20717
chr1	28559573	28559574	rs510803	C	G	0.2873	-0.859191	-0.921149	-1.78034
chr1	28559693	28559694	rs474597	A	G	0.2873	0.81241	-0.635965	0.176445
chr1	28562251	28562252	rs479572	C	G	0.2863	-0.839784	-0.19399	-1.03377
chr1	28573706	28573707	rs554522114	A	AG	0.2932	0.730352	-0.681836	0.0485162
chr1	28600445	28600446	rs77408888	T	A	0.0447	-0.739021	0.257205	-0.481816
chr1	28607799	28607800	rs17357180	G	C	0.0457	0.617277	-0.631352	-0.0140751
chr1	28609877	28609878	rs17185157	A	G	0.0457	0.606115	0.203228	0.809343
chr1	28640675	28640676	rs74541415	C	T	0.0368	-0.739944	-0.129784	-0.869727
chr1	28736349	28736350	rs6686344	T	C	0.0378	0.68404	-1.10403	-0.419988
chr1	28764681	28764682	rs34320456	GT	G	0.0378	-0.97779	-0.0960386	-1.07383
chr1	28776683	28776684	rs74064842	C	T	0.0378	-0.678213	-0.241353	-0.919566
chr1	28827562	28827563	rs6688161	G	A	0.0378	1.29817	-1.78008	-0.481913
chr1	28827962	28827963	rs16837594	C	T	0.0378	0.645526	-1.25558	-0.610058
chr1	28919260	28919261	rs115696952	G	A	0.0219	-0.710921	-1.48831	-2.19923
chr1	28921479	28921480	rs115638881	G	A	0.0517	-0.713346	-0.00575076	-0.719097
chr1	28925721	28925722	rs77107214	C	T	0.0765	-1.10539	0.150526	-0.954866
chr1	28925799	28925800	rs80257745	C	T	0.0427	-0.605482	-0.222278	-0.827759
chr1	28975400	28975401	rs9426296	G	T	0.2972	-0.858393	-0.948821	-1.80721
chr1	28975556	28975557	rs9426392	A	G	0.3032	-1.06942	0.798197	-0.271222
chr1	28980876	28980877	rs142090639	C	A	0.0119	-0.8093	0.292263	-0.517038
chr1	28996759	28996760	rs113503514	G	C	0.0109	1.41633	-1.77605	-0.359719
chr1	29064035	29064036	rs61787567	C	T	0.2276	-0.878563	-0.630453	-1.50902
chr1	29123563	29123564	rs11801719	C	G	0.0477	-0.679482	-0.565353	-1.24483
chr1	29140418	29140419	rs76482001	T	C	0.0467	-0.589354	-0.433784	-1.02314
chr1	29187260	29187261	rs56095229	C	T	0.0199	0.805173	-1.19923	-0.394062
chr1	29232876	29232877	rs203300	G	C	0.0656	0.983649	-0.578325	0.405324
chr1	29233045	29233046	rs72649212	G	C	0.0656	0.931378	-1.81232	-0.880944
chr1	29253738	29253739	rs61383577	A	G	0.1074	-0.878854	0.105427	-0.773427
chr1	29286110	29286111	rs3102739	A	T	0.7247	-0.754085	-0.332016	-1.0861
chr1	29360694	29360695	rs143295410	C	T	0.0129	0.741248	-0.775032	-0.0337839
chr1	29439648	29439649	rs200572981	AT	A	0.0427	1.31957	-1.42659	-0.107025
chr1	29451501	29451502	rs2993710	A	G	0.8738	1.05776	-0.769728	0.288027
chr1	29451597	29451598	rs3003630	A	C	0.8569	1.11032	-0.779443	0.330878
chr1	29462999	29463000	rs2486196	T	G	0.8847	0.650209	-0.617227	0.0329824
chr1	29463511	29463512	rs77280685	C	G	0.0746	0.73924	-0.914639	-0.175399
chr1	29507646	29507647	rs3094740	G	C	0.3161	1.26885	-0.748238	0.520607
chr1	29562951	29562952	rs143468964	A	G	0.17	0.704071	-0.038196	0.665875
chr1	29566949	29566950	rs2503020	G	A	0.8807	0.962209	-1.35802	-0.395811
chr1	29581089	29581090	rs16838061	C	G	0.6302	-0.647234	-0.0359939	-0.683227
chr1	29598290	29598291	rs6676287	G	A	0.5835	-0.635249	-1.02593	-1.66118
chr1	29652674	29652675	rs1062921	T	A	0.1352	0.81548	-1.11489	-0.299414
chr1	29753687	29753688	rs9426348	T	A	0.2475	-0.623513	-0.0235179	-0.647031
chr1	29753796	29753797	rs12079822	G	A	0.2386	0.710246	-1.11512	-0.404875
chr1	29780037	29780038	rs7547385	G	C	0.5915	0.691669	-1.46181	-0.770145
chr1	29830938	29830939	rs12141775	A	G	0.3141	-0.88573	-0.522563	-1.40829
chr1	30042765	30042766	rs28459447	T	C	0.4563	-0.650671	-0.799068	-1.44974
chr1	30043277	30043278	rs140800773	G	A	0.0189	-0.959388	1.14041	0.181025
chr1	30048034	30048035	rs78562636	T	G	0.0159	0.757772	-1.41322	-0.655443
chr1	30122749	30122750	rs56031318	C	T	0.1988	0.828225	-1.58768	-0.759451
chr1	30148809	30148810	rs271360	G	C	0.7863	1.0049	-0.980837	0.024064
chr1	30161688	30161689	rs140576088	T	G	0.0219	-1.10694	0.0700328	-1.03691
chr1	30162534	30162535	rs9726412	T	C	0.6342	-1.25615	-0.687828	-1.94398
chr1	30228841	30228842	rs113880842	A	C	0.0527	-0.674643	-0.646482	-1.32113
chr1	30228879	30228880	rs141082238	A	G	0.0169	0.692158	-0.764055	-0.0718974
chr1	30229023	30229024	rs28378043	A	G	0.1909	-0.920776	-0.146343	-1.06712
chr1	30229050	30229051	rs12749839	G	A	0.2316	-0.626911	-0.260352	-0.887263
chr1	30257691	30257692	rs10753255	G	C	0.5467	-0.732471	0.110902	-0.621569
chr1	30311768	30311769	rs12046763	A	C	0.167	-1.15481	1.1134	-0.0414157
chr1	30322403	30322404	rs10914538	A	G	0.7247	1.53507	-1.75785	-0.222781
chr1	30331573	30331574	rs114153975	G	A	0.0229	-1.24434	-0.405751	-1.65009
chr1	30331754	30331755	rs4949504	C	T	0.2813	1.31661	-0.206227	1.11038
chr1	30371042	30371043	rs12734383	C	G	0.2763	-0.590469	0.678985	0.0885164
chr1	30371139	30371140	rs61406390	C	T	0.0646	0.912766	-0.834997	0.0777688
chr1	30373865	30373866	rs10914600	A	G	0.501	-0.702846	-0.112647	-0.815493
chr1	30374732	30374733	rs72658950	G	A	0.0169	-0.804573	-0.335162	-1.13974
chr1	30417142	30417143	rs10914662	C	A	0.6352	-0.752548	0.451511	-0.301037
chr1	30438217	30438218	rs72658984	G	A	0.1113	-0.657928	0.0784366	-0.579491
chr1	30457876	30457877	rs4949530	T	G	0.7038	1.30316	-1.28526	0.0179033
chr1	30484065	30484066	rs144693671	C	CTT	0.4294	-0.998673	0.0016661	-0.997007
chr1	30507824	30507825	rs114235209	T	C	0.0437	-0.695749	0.428066	-0.267683
chr1	30563641	30563642	rs11584570	C	T	0.4036	0.611844	-1.02146	-0.409611
chr1	30563689	30563690	rs11584574	C	T	0.4036	-0.597257	-0.404138	-1.0014
chr1	30574320	30574321	rs910629	G	T	0.5686	0.622508	-1.47752	-0.85501
chr1	30574412	30574413	rs11807362	G	A	0.2873	0.588046	-1.22854	-0.640491
chr1	30574465	30574466	rs941516	C	T	0.2813	-0.893793	-0.56566	-1.45945
chr1	30574811	30574812	rs61759109	G	A	0.1998	1.88034	-1.40157	0.478776
chr1	30584422	30584423	rs532568670	A	G	0.0696	0.589501	-0.603082	-0.0135804
chr1	30584428	30584429	rs568569847	A	G	0.0696	-0.981157	-0.706427	-1.68758
chr1	30596724	30596725	rs2007080	G	A	0.0229	-0.893776	-0.56888	-1.46266
chr1	30599095	30599096	rs58567111	C	T	0.0318	0.853432	-0.00762436	0.845807
chr1	30663914	30663915	rs12061092	A	T	0.5924	-1.03817	-0.133879	-1.17205
chr1	30669952	30669953	rs10799087	A	G	0.325	0.884551	-1.96849	-1.08394
chr1	30670010	30670011	rs10799088	C	A	0.325	-0.724061	-0.426016	-1.15008
chr1	30759955	30759956	rs463128	T	C	0.2425	0.629827	-0.588331	0.0414953
chr1	30805610	30805611	rs1076882	C	G	0.3072	0.80848	-1.26902	-0.460542
chr1	30809558	30809559	rs375847	C	T	0.1233	0.729413	-0.0150329	0.71438
chr1	30859412	30859413	rs10799102	T	C	0.664	0.662294	-1.28262	-0.62033
chr1	30859858	30859859	rs16866144	A	G	0.664	-0.625812	-0.511119	-1.13693
chr1	30879487	30879488	rs3855869	A	T	0.1362	-0.932636	-0.413085	-1.34572
chr1	30885081	30885082	rs651524	C	T	0.8618	-0.826828	0.57011	-0.256718
chr1	30885209	30885210	rs650676	C	T	0.6789	-0.692605	0.0699903	-0.622615
chr1	30885348	30885349	rs12029866	G	A	0.1829	-0.804019	-0.102459	-0.906478
chr1	30919377	30919378	rs12117449	C	T	0.4085	-0.639927	-1.03499	-1.67492
chr1	30919528	30919529	rs114712677	C	G	0.0229	0.851626	-0.799931	0.0516952
chr1	30995904	30995905	rs58092429	G	A	0.0726	-1.06327	-1.59474	-2.65801
chr1	31000289	31000290	rs2019878	G	A	0.9503	1.3413	-1.65165	-0.310356
chr1	31049465	31049466	rs56929567	G	A	0.0189	0.609537	-1.76245	-1.15292
chr1	31049599	31049600	rs60916732	T	C	0.0209	0.630523	-0.608634	0.0218897
chr1	31110507	31110508	rs77380793	T	C	0.0159	-0.846004	0.0198411	-0.826163
chr1	31137149	31137150	rs72652775	A	G	0.1918	-1.03729	0.400475	-0.636815
chr1	31151616	31151617	rs79373335	T	A	0.0109	1.15701	-1.08952	0.0674966
chr1	31170822	31170823	rs1188436	T	C	0.2157	-0.794703	-0.667605	-1.46231
chr1	31177519	31177520	rs1149029	T	C	0.2157	0.757303	-1.47149	-0.714184
chr1	31179676	31179677	rs1149036	C	T	0.3588	1.03511	-0.15296	0.882147
chr1	31181053	31181054	rs36091053	G	A	0.1113	1.05486	-0.595285	0.459577
chr1	31181211	31181212	rs35953489	T	C	0.0815	0.60089	-1.45213	-0.851243
chr1	31188088	31188089	rs1065755	C	T	0.3638	-1.36452	-0.139813	-1.50433
chr1	31192127	31192128	rs3790493	C	T	0.0805	-0.75781	-1.47288	-2.23069
chr1	31192329	31192330	rs1149041	G	T	0.1034	-0.843851	-0.760356	-1.60421
chr1	31200435	31200436	rs1149051	C	T	0.0765	0.609664	-0.959909	-0.350244
chr1	31208267	31208268	rs540268973	A	C	0.0865	0.825061	-0.854175	-0.0291136
chr1	31222490	31222491	rs1920420	A	C	0.3131	-0.655931	-0.0490977	-0.705029
chr1	31227440	31227441	rs1951782	C	T	0.5229	-0.683971	-0.733173	-1.41714
chr1	31243061	31243062	rs10914198	T	C	0.3072	-1.22324	-0.299699	-1.52294
chr1	31252615	31252616	rs142197644	C	T	0.0239	-0.679862	0.812224	0.132363
chr1	31255904	31255905	rs4147103	T	C	0.4801	-0.58948	-0.009515	-0.598995
chr1	31259962	31259963	rs112712102	G	C	0.1282	1.31413	-1.66101	-0.346873
chr1	31260059	31260060	rs11582071	G	A	0.6203	1.16111	-1.59879	-0.437687
chr1	31282325	31282326	rs4949181	A	G	0.7674	0.684668	-0.767437	-0.082769
chr1	31289077	31289078	rs61743640	C	T	0.167	-1.15962	-1.22011	-2.37973
chr1	31297745	31297746	rs7531362	C	A	0.338	-0.648806	-1.02858	-1.67738
chr1	31320035	31320036	rs72657224	C	T	0.0129	-0.784829	-0.460399	-1.24523
chr1	31320071	31320072	rs56376866	C	T	0.1312	1.25334	-2.16484	-0.911497
chr1	31320803	31320804	rs61767331	A	C	0.0686	1.92927	-0.742817	1.18646
chr1	31325026	31325027	rs947646	G	C	0.1978	0.729801	-0.715642	0.014159
chr1	31337324	31337325	rs7527896	C	T	0.3052	1.14059	-2.40272	-1.26213
chr1	31361326	31361327	rs7412502	A	C	0.4861	0.761479	-0.581887	0.179592
chr1	31439859	31439860	rs45439195	G	A	0.0547	-0.877638	-0.0048654	-0.882504
chr1	31573530	31573531	rs60542499	G	C	0.1074	0.816136	-1.16028	-0.344146
chr1	31574475	31574476	rs116679227	C	T	0.0388	0.998836	-0.871546	0.12729
chr1	31575445	31575446	rs883300	C	A,G	0.1113	0.950191	-0.949549	0.00064272
chr1	31584115	31584116	rs143464520	C	T	0.0308	0.710066	-1.26241	-0.552345
chr1	31584479	31584480	rs114685222	C	T	0.0159	-0.817579	-0.0357364	-0.853316
chr1	31593902	31593903	rs7527249	A	C,G	0.1024	-0.656997	-0.327464	-0.984461
chr1	31618876	31618877	rs56021277	A	C,G	0.1014	-0.946915	-0.707993	-1.65491
chr1	31674573	31674574	rs72891344	C	T	0.0129	-0.589324	-0.585629	-1.17495
chr1	31712313	31712314	rs12025507	C	T	0.2117	-0.702226	-0.169933	-0.87216
chr1	31835526	31835527	rs6663779	C	T	0.168	-0.732474	-0.270693	-1.00317
chr1	31854390	31854391	rs12058198	T	C	0.168	0.679162	-0.986375	-0.307212
chr1	31855066	31855067	rs72510624	C	CA	0.168	-0.649803	0.00759556	-0.642207
chr1	31904718	31904719	rs570625164	G	A	0.0199	-1.00889	-0.170249	-1.17914
chr1	31904722	31904723	rs533177230	A	T	0.0229	-1.40652	-0.16318	-1.5697
chr1	31904768	31904769	rs539645196	T	C,G	0.0696	-0.942614	-0.583178	-1.52579
chr1	31904786	31904787	rs541951026	T	C,G	0.0686	-0.921456	-0.648217	-1.56967
chr1	31904804	31904805	rs564410092	T	C,G	0.0358	-0.959696	-0.575766	-1.53546
chr1	31904930	31904931	rs368382149	T	C,G	0.0944	-0.959833	-0.645898	-1.60573
chr1	31904966	31904967	rs539793222	T	C,G	0.0557	-0.942614	-0.583178	-1.52579
chr1	31917652	31917653	rs2889751	A	C	0.7237	0.624131	-1.44583	-0.821696
chr1	31918022	31918023	rs10914396	T	G	0.7237	0.645828	-0.595861	0.0499677
chr1	31918285	31918286	rs1316967	G	A	0.7237	-0.722046	-0.178031	-0.900077
chr1	31944344	31944345	rs12408140	C	A	0.2515	-0.629139	-0.543591	-1.17273
chr1	31944369	31944370	rs6425755	T	C	0.7634	-0.727414	-1.30767	-2.03509
chr1	31950129	31950130	rs75124835	C	G	0.0239	-2.0674	1.10045	-0.966953
chr1	31989009	31989010	rs41263951	C	A	0.1233	0.639165	-0.763361	-0.124196
chr1	31989288	31989289	rs72662915	A	G	0.1233	0.616258	-1.52465	-0.908392
chr1	32014494	32014495	rs1574539	G	A	0.2853	0.816493	-1.07719	-0.2607
chr1	32034820	32034821	rs35154716	T	C	0.3807	0.874087	-1.28189	-0.407808
chr1	32039392	32039393	rs3008408	T	G	0.9195	-0.631195	-0.945642	-1.57684
chr1	32039978	32039979	rs113651982	G	T	0.0805	1.3273	-1.93117	-0.603873
chr1	32059763	32059764	rs12065856	T	A	0.7078	0.823372	-1.24957	-0.426194
chr1	32062065	32062066	rs4949448	G	T	0.4801	1.40322	-1.53282	-0.129605
chr1	32102770	32102771	rs10624458	A	ACCTCC	0.6352	0.877748	-0.84434	0.0334078
chr1	32110515	32110516	rs552449622	A	C	0.1223	0.672509	-0.980374	-0.307866
chr1	32136397	32136398	rs1474182	G	A	0.5954	-0.689778	0.179011	-0.510766
chr1	32136412	32136413	rs75826603	G	A	0.0328	-0.638454	-0.0746978	-0.713152
chr1	32177703	32177704	rs12072552	C	A	0.5268	-1.02413	-0.230808	-1.25493
chr1	32177924	32177925	rs10914470	C	T	0.2465	-0.610899	-0.778022	-1.38892
chr1	32177935	32177936	rs10914471	T	C	0.6521	-1.35605	0.654786	-0.701265
chr1	32226876	32226877	rs200020223	G	GC	0.0179	-0.614834	-1.15614	-1.77098
chr1	32245051	32245052	rs146205436	A	G	0.0109	-0.639627	-0.266127	-0.905754
[truncated: 93,805 more rows]
