# Supplementary material for: Human cardiac cis -regulatory elements, their cognate transcription factors, and regulatory DNA sequence variants
Source: HighWire-hosted journal article supplement (doi:10.1101/gr.234633.118), 2018-08-23
Supplement: Supplemental_Material.pdf [file Supplemental_Material.pdf]

Supplemental Material for

**Human cardiac cis-regulatory elements, their cognate transcription factors and  
regulatory DNA sequence variants**

Dongwon Lee\*, Ashish Kapoor, Alexias Safi, Lingyun Song, Marc K. Halushka, Gregory E.

Crawford, Aravinda Chakravarti\*

\*Corresponding authors: [aravinda.chakravarti@nyumc.org](mailto:aravinda.chakravarti@nyumc.org), [dongwon.lee@nyumc.org](mailto:dongwon.lee@nyumc.org)

**This document includes:**

Supplemental Methods

Supplemental Figures S1 to S11

Supplemental Tables S1 to S5

Legends for Supplemental Data S1 to S6

## **Supplemental Methods**

### **DNase-seq on adult human heart samples**

Two adult female human heart left ventricle (LV) samples, one from an autopsy accessed 5 hours postmortem and one from an explant accessed 12 hours post-surgery, were collected for DNase-seq experiments, under a Johns Hopkins University School of Medicine IRB-approved protocol. To evaluate the effect of postmortem or post-surgery time interval on DNase I hypersensitivity, two pieces were dissected from each sample, both snap frozen either immediately after dissection or after being left at room temperature for 19 hours and 12 hours, respectively. DNase-seq libraries were constructed as previously described (Song and Crawford 2010), with each library sequenced using a 50bp single-end protocol on an Illumina HiSeq 2000 instrument to an average depth of 25 million aligned reads per sample. We trimmed the DNase-seq reads to 20 bp to remove adapter sequences and aligned them to the hg19 human genome using Bowtie (Langmead et al. 2009) with parameters `-n 2 -m 4`. We identified minimal effects of postmortem or post-surgical time interval on DNase-seq signals, and, therefore, pooled them as technical replicates.

### **gkm-SVM training**

To train gkm-SVM, we followed a previously described method with minor modifications (Lee et al. 2015; Lee 2016). Briefly, we defined a positive set by finding 600bp regions centered at each of the DHS summits, and a negative set as an equal number of random genomic regions matching GC-content, repeat fraction, and the length distribution of the positive set. Both positive and negative regions from Chromosome 9 were set aside for evaluation of classification performance. We trained gkm-SVM using the new software LS-GKM with default parameters: weighted gkm-kernel,  $L = 11$ ,  $k = 7$ , and  $d = 3$ . We built final models by averaging gkm-SVMs trained on ten independently generated negative sets. For comparison of classification performance across models, we also tried 300bp regions and the original gkm-kernel (Ghandi et al. 2014) keeping other parameters fixed. Next, we tested its ability to predict new DHSs by focusing on a SVM model trained on only the Roadmap data. We

excluded DHSs overlapping the Roadmap DHSs from each of the remaining four data sets, to ensure that DHSs for validation were never seen in training. Then, we scored the remaining DHSs as well as random genomic regions and compared their distributions. To investigate the relationship between the number of samples used for model building and a model's accuracy, we predicted the top 10,000 regions using each of the models from all possible combinations of samples, comparing them to the reserved chromosome 9 DHSs ( $n = 7,070$ ). The recall rate ("the number of recovered true DHSs by the prediction" / "the number of true DHSs") was then estimated. As expected, the recall rate increased as more samples were used for prediction (Supplemental Fig. S4B).

### **GRCh38 vs. hg19**

To test the effect of the reference genome on gkm-SVM, we retrained the model using the Roadmap data and compared their SVM weights. Specifically, we downloaded the GRCh38 mapped reads from the ENCODE portal website (file name: ENCFF837QAV.bam) and recalled the peaks as described in Methods. Expectedly, most hg19 DHSs (~94%; 103,778/110,636) overlap GRCh38 DHSs lifted over to hg19. A new model trained on GRCh38 DHSs achieved similar AUC to the original hg19 model (AUC=0.913). Moreover, we achieved a very high correlation ( $C = 0.85$ ) between the GRCh38 (single negative set) model vs. the hg19 (an average of 10 negative sets). Since the randomly generated negative sets also contribute to the variation, the imperfect correlation was expected. We therefore concluded that the reference genome would not significantly alter our gkm-SVM models and results.

### **Data sets for genomic annotations**

To identify H3K27ac marked regions in heart tissues, we obtained the processed H3K27ac ChIP-seq peaks directly from the ENCODE portal ([www.encodeproject.org](http://www.encodeproject.org)). We downloaded 8 H3K27ac peak files (file accessions: ENCFF101VMB, ENCFF159NYF, ENCFF995GJW, ENCFF124AQU, ENCFF175SDM, ENCFF134ZIJ, ENCFF277TVL, ENCFF546TJN) from heart tissues (left/right ventricle, right atrium auricle, and right cardiac atrium), extended them 100bp at both ends, and

combined them, resulting in 118,597 distinct cardiac H3K27ac peaks. For the mappability analysis, we obtained the pre-calculated mappability (24bp and 36bp) (Derrien et al. 2012) from the ENCODE UCSC genome browser and calculated the proportion of ambiguous bases for each category of the predicted DHSs. As a marker for heterochromatin DNA, we used ENCODE H3K9me3 ChIP-seq data sets from multiple heart tissues (left/right ventricles and right cardiac atrium). We downloaded six H3K9me3 peak files from the ENCODE portal website (File accession: ENCFF964NVL, ENCFF951QMV, ENCFF495QNH, ENCFF253OXB, ENCFF524ELE, ENCFF137LHG) and merged them to define heart H3K9me3 regions. Then, we calculated proportion of predicted DHSs overlapping these regions (>1bp overlap). To calculate SNP frequencies, we divided all SNPs from the 1000 Genome project into common and rare variants using 1% MAF in European ancestry subjects as the threshold. We then calculated the SNP frequencies as “the number of (common or rare) SNPs in predicted DHSs” divided by “the total base coverage of the DHSs”.

### **Transcription factor binding motifs**

The full list of position weight matrices (PWMs) of human transcription factors (TF) were obtained from the Catalog of Inferred Sequence Binding Preferences (CIS-BP) (last updated: Apr 5th, 2015, build 1.02) (Weirauch et al. 2014). We excluded low confidence PWMs likely derived from false oligonucleotides (stem loop forms of single-stranded DNA) in HT-SELEX experiments (Jolma et al. 2013; Orenstein and Shamir 2014), and then selected one motif per TF to reduce redundancy based on their source types (MSource\_Type) with the following order of preference: (1) JASPAR, (2) ChIP-seq, (3) HT-SELEX, (4) PBM, (5) HOCOMOCO, (6) B1H, and (7) TRANSFAC. This resulted in 775 distinct motifs associated with 811 TFs. We augmented this list with a newly identified set of 93 C2H2 Zinc Finger TF motifs added CIS-BP (Schmitges et al. 2016). The final set contained 868 distinct motifs associated with 904 TFs (Supplemental Data 4 and 5).

### **Gene expression analysis of transcription factors**

We obtained median expression values (FPKM) of all genes for 53 tissues (V6P) from the GTEx project (The GTEx Consortium 2015). These values were normalized by the TMM (trimmed mean of M-values) method (Robinson and Oshlack 2010) implemented in edgeR (Robinson et al. 2010). We declared genes with normalized expression value  $> 1$  as ‘expressed.’ Starting from the 904 TFs with known PWMs we identified, we constructed 2x2 contingency tables for each tissue using two binary variables: whether the corresponding motifs were enriched or not in heart CREs and whether they are expressed or not in a given tissue, and used one-sided Fisher’s exact test to determine statistical significance. We also identified 350 commonly expressed TFs, defined as expressed in 90% or greater of GTEx tissues, and repeated the association tests after removing these TFs.

### **ENCODE ChIP-seq data analysis**

To validate the predicted cardiac TFs, we analyzed ENCODE ChIP-seq data sets. We first downloaded all TF ChIP-seq data sets ( $n=2,287$ ) from the ENCODE portal website with the following criteria: hg19 (genome build), bed narrowPeak (file type), optimal (output type). We then identified a subset of 1,367 data sets covering 302 distinct TFs whose binding specificities were available in our motif database. Among them, 176 TFs from 1,054 data sets matched the 334 potential cardiac TFs, while the remaining 126 TFs from 313 data sets did not. For each of these data sets, we calculated the proportion of TF ChIP-seq regions overlapping observed and predicted DHSs, and compared the distributions between these two classes (cardiac vs non-cardiac TFs).

### **Properties of common DHSs**

DHSs from all ENCODE and Roadmap projects were aggregated using BEDTools multiinter command (Quinlan and Hall 2010) to find common open chromatin regions. We identified these as regions that are accessible in at least 30% of the samples tested; common heart DHSs were those present in heart tissues only. For the CTCF-bound regions, we obtained 71 data sets of the processed CTCF ChIP-seq peaks from a previous study (Ghandi et al. 2014) and merged them to identify all potential CTCF

binding sites ( $n = 118,579$ ) in the human genome. For transcription start sites, we used GENCODE v19 transcripts (hg19) (Harrow et al. 2012). To identify sequence features differentially enriched in the common heart DHSs, we compared SVM weights between the generic and specific cardiac models. The 11-mer SVM weights were normalized to Z-scores (zero means, unit variance) for comparisons between models. We identified 11-mers with  $>6$  Z-score differences as common DHS enriched 11-mers.

### **Preprocessing of DNase-seq data sets for allele-biased DHSs**

We used twelve fetal heart DNase-seq data sets from the Roadmap project (GSM530661, GSM665809, GSM665811, GSM665814, GSM665817, GSM665824, GSM665830, GSM665831, GSM723023, GSM774203, GSM817220, and GSM878630) as well as the five adult heart DNase-seq data sets from this study. To reduce reference sequence mapping bias, we realigned DNase-seq reads using GSNAP with the “SNP-tolerant alignment” option (Wu and Watanabe 2005; Wu and Nacu 2010) using all common SNPs in dbSNP138 as a reference. After read mapping, we retained the properly mapped reads with at least 30 MAPQ scores for downstream analysis. We were only able to remap the DNase-seq reads generated by the UW protocol (12 fetal samples + 1 adult sample) because of their longer read lengths.

### **Heritability analysis of QT-interval and other phenotypes**

We adapted the LD score regression method (Bulik-Sullivan et al. 2015; Finucane et al. 2015) to calculate partitioned heritability of the QT<sub>i</sub>, systolic blood pressure, diastolic blood pressure, pulse rate and BMI, based on our heart CRE annotations. We obtained the QT<sub>i</sub> summary statistics from the senior author (Arking et al. 2014), and the summary statistics of other phenotypes from the UK-biobank project ([sites.google.com/broadinstitute.org/ukbbgwasresults](https://sites.google.com/broadinstitute.org/ukbbgwasresults)). For LD score regression analysis, we used European ancestry 1KGP individuals (Phase 3) as a reference panel. Partitioned heritability was estimated for each annotation along with 53 baseline annotations, using HapMap3 common (MAF  $> 5\%$ ) SNPs as regression SNPs and the 1KGP common SNPs (MAF  $> 5\%$ ) as reference SNPs, as

recommended (Finucane et al. 2015). All the data for these LD score regression analyses were obtained from: [data.broadinstitute.org/alkesgroup/LDSCORE](http://data.broadinstitute.org/alkesgroup/LDSCORE).

## References

- Arking DE, Pulit SL, Crotti L, van der Harst P, Munroe PB, Koopmann TT, Sotoodehnia N, Rossin EJ, Morley M, Wang X, et al. 2014. Genetic association study of QT interval highlights role for calcium signaling pathways in myocardial repolarization. *Nat Genet* **46**: 826–836.
- Bulik-Sullivan BK, Loh P-R, Finucane HK, Ripke S, Yang J, Schizophrenia Working Group of the Psychiatric Genomics Consortium, Patterson N, Daly MJ, Price AL, Neale BM. 2015. LD Score regression distinguishes confounding from polygenicity in genome-wide association studies. *Nat Genet* **47**: 291–295.
- Derrien T, Estellé J, Marco Sola S, Knowles DG, Raineri E, Guigó R, Ribeca P. 2012. Fast Computation and Applications of Genome Mappability. *PLoS ONE* **7**: e30377.
- Finucane HK, Bulik-Sullivan B, Gusev A, Trynka G, Reshef Y, Loh P-R, Anttila V, Xu H, Zang C, Farh K, et al. 2015. Partitioning heritability by functional annotation using genome-wide association summary statistics. *Nat Genet* **47**: 1228–1235.
- Ghandi M, Lee D, Mohammad-Noori M, Beer MA. 2014. Enhanced Regulatory Sequence Prediction Using Gapped k-mer Features. *PLoS Comput Biol* **10**: e1003711.
- Harrow J, Frankish A, Gonzalez JM, Tapanari E, Diekhans M, Kokocinski F, Aken BL, Barrell D, Zadissa A, Searle S, et al. 2012. GENCODE: The reference human genome annotation for The ENCODE Project. *Genome Res* **22**: 1760–1774.
- Jolma A, Yan J, Whittington T, Toivonen J, Nitta KR, Rastas P, Morgunova E, Enge M, Taipale M, Wei G, et al. 2013. DNA-Binding Specificities of Human Transcription Factors. *Cell* **152**: 327–339.
- Langmead B, Trapnell C, Pop M, Salzberg SL. 2009. Ultrafast and memory-efficient alignment of short DNA sequences to the human genome. *Genome Biol* **10**: R25.
- Lee D. 2016. LS-GKM: a new gkm-SVM for large-scale datasets. *Bioinformatics* **32**: 2196–2198.
- Lee D, Gorkin DU, Baker M, Strober BJ, Asoni AL, McCallion AS, Beer MA. 2015. A method to predict the impact of regulatory variants from DNA sequence. *Nat Genet* **47**: 955–961.
- Orenstein Y, Shamir R. 2014. A comparative analysis of transcription factor binding models learned from PBM, HT-SELEX and ChIP data. *Nucleic Acids Res* **42**: e63–e63.
- Quinlan AR, Hall IM. 2010. BEDTools: a flexible suite of utilities for comparing genomic features. *Bioinformatics* **26**: 841–842.
- Robinson MD, McCarthy DJ, Smyth GK. 2010. edgeR: a Bioconductor package for differential expression analysis of digital gene expression data. *Bioinformatics* **26**: 139–140.

- Robinson MD, Oshlack A. 2010. A scaling normalization method for differential expression analysis of RNA-seq data. *Genome Biol* **11**: R25.
- Schmitges FW, Radovani E, Najafabadi HS, Barazandeh M, Campitelli LF, Yin Y, Jolma A, Zhong G, Guo H, Kanagalingam T, et al. 2016. Multiparameter functional diversity of human C2H2 zinc finger proteins. *Genome Res* **26**: 1742–1752.
- Song L, Crawford GE. 2010. DNase-seq: A High-Resolution Technique for Mapping Active Gene Regulatory Elements across the Genome from Mammalian Cells. *Cold Spring Harb Protoc* **2010**. <http://cshprotocols.cshlp.org/content/2010/2/pdb.prot5384> (Accessed January 14, 2015).
- The GTEx Consortium. 2015. The Genotype-Tissue Expression (GTEx) pilot analysis: Multitissue gene regulation in humans. *Science* **348**: 648–660.
- Weirauch MT, Yang A, Albu M, Cote AG, Montenegro-Montero A, Drewe P, Najafabadi HS, Lambert SA, Mann I, Cook K, et al. 2014. Determination and Inference of Eukaryotic Transcription Factor Sequence Specificity. *Cell* **158**: 1431–1443.
- Wu TD, Nacu S. 2010. Fast and SNP-tolerant detection of complex variants and splicing in short reads. *Bioinformatics* **26**: 873–881.
- Wu TD, Watanabe CK. 2005. GMAP: a genomic mapping and alignment program for mRNA and EST sequences. *Bioinformatics* **21**: 1859–1875.



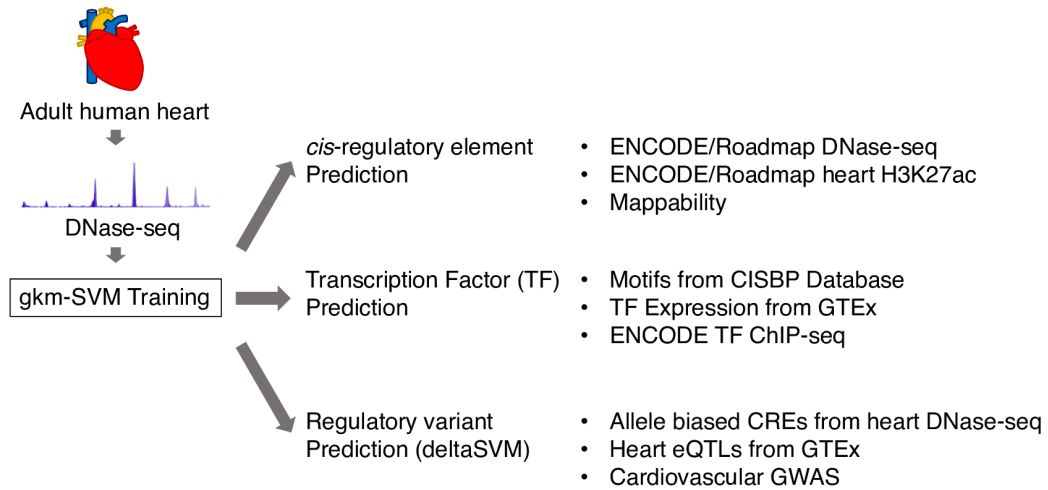

**Supplemental Figure S1. A schematic overview of our study.** Major data sets used for analyses are listed.

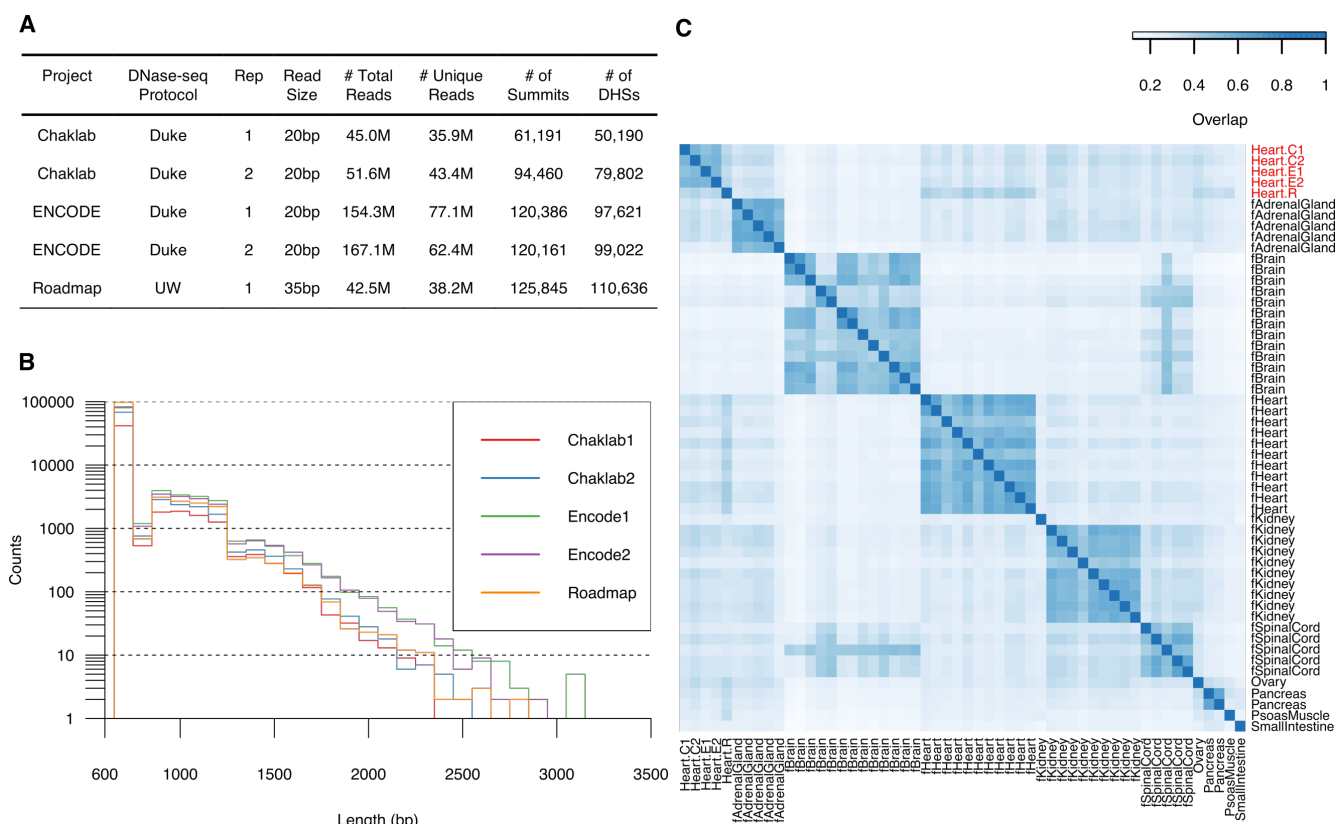

**Supplemental Figure S2. DHSs in individual human tissues show the greatest similarity**

**to their biological replicates than to other tissues. (A)** Genomic statistics of five biological heart

DNase-seq replicate data. **(B)** Distribution of DHS element lengths of five replicates. **(C)** Pairwise DHS

overlap between different tissues: the top 50,000 regions from each sample were selected and overlap

estimated by the Jaccard index (number of bases in their intersection over their union); C1: Chaklab 1,

C2: Chaklab 2, E1: ENCODE 1, E2: ENCODE 2, R: Roadmap; the prefix 'f' stands for fetal tissues; other

tissue samples data were obtained from the Roadmap Epigenomics project.

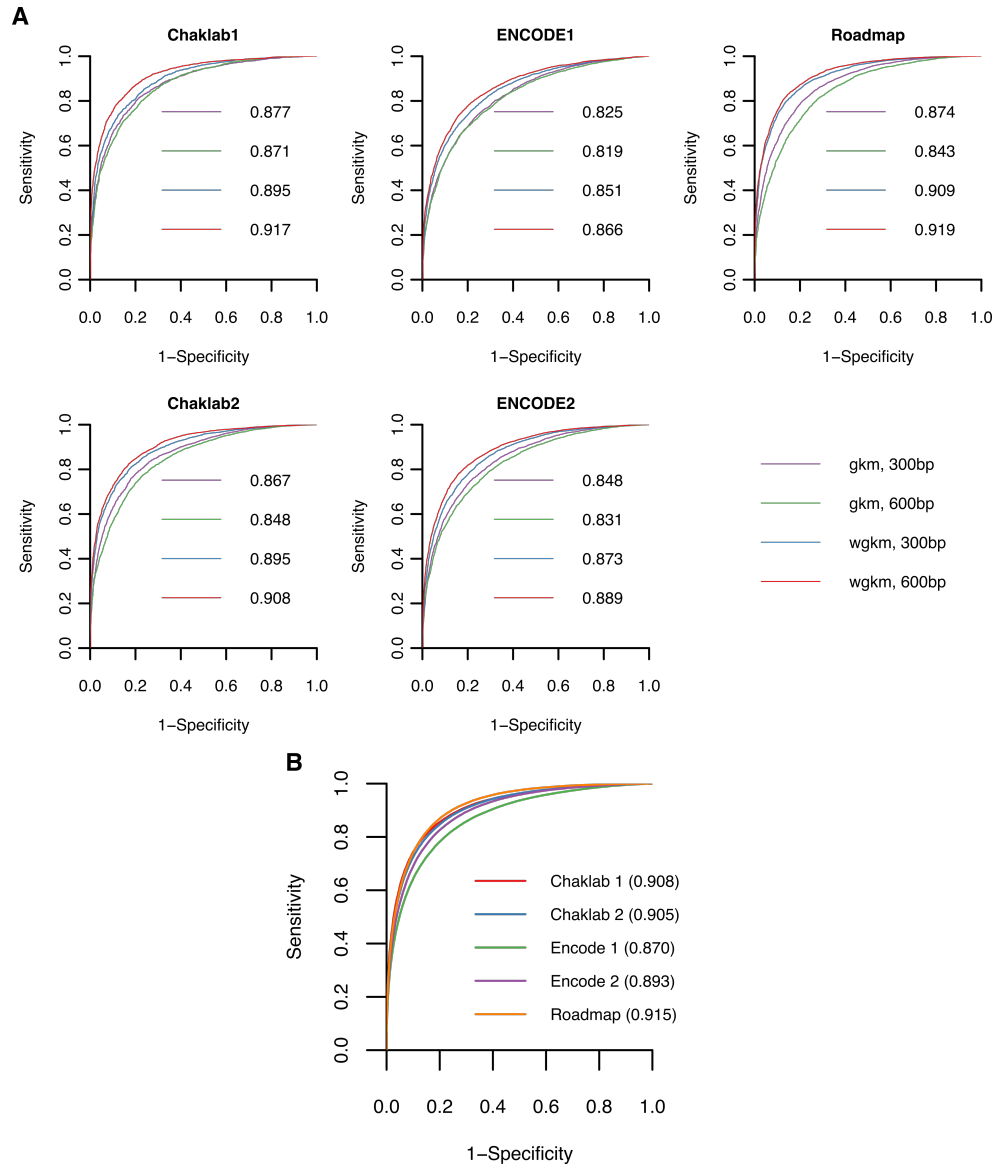

**Supplemental Figure S3. New LS-GKM software generates more accurate models. (A)**

Receiver operating characteristic (ROC) curves of gkm-SVM trained on each of five heart DNase-seq replicate data sets with different parameters using the LS-GKM software. gkm: original gkm-kernel; wgkm: weighted gkm-kernel; DHS lengths of 300bp and 600bp. Reserved chromosome 9 test sets were used for evaluation. wgkm with 600bp achieved the best classification performance in all cases. **(B)** ROC curves with 5-fold cross validation.

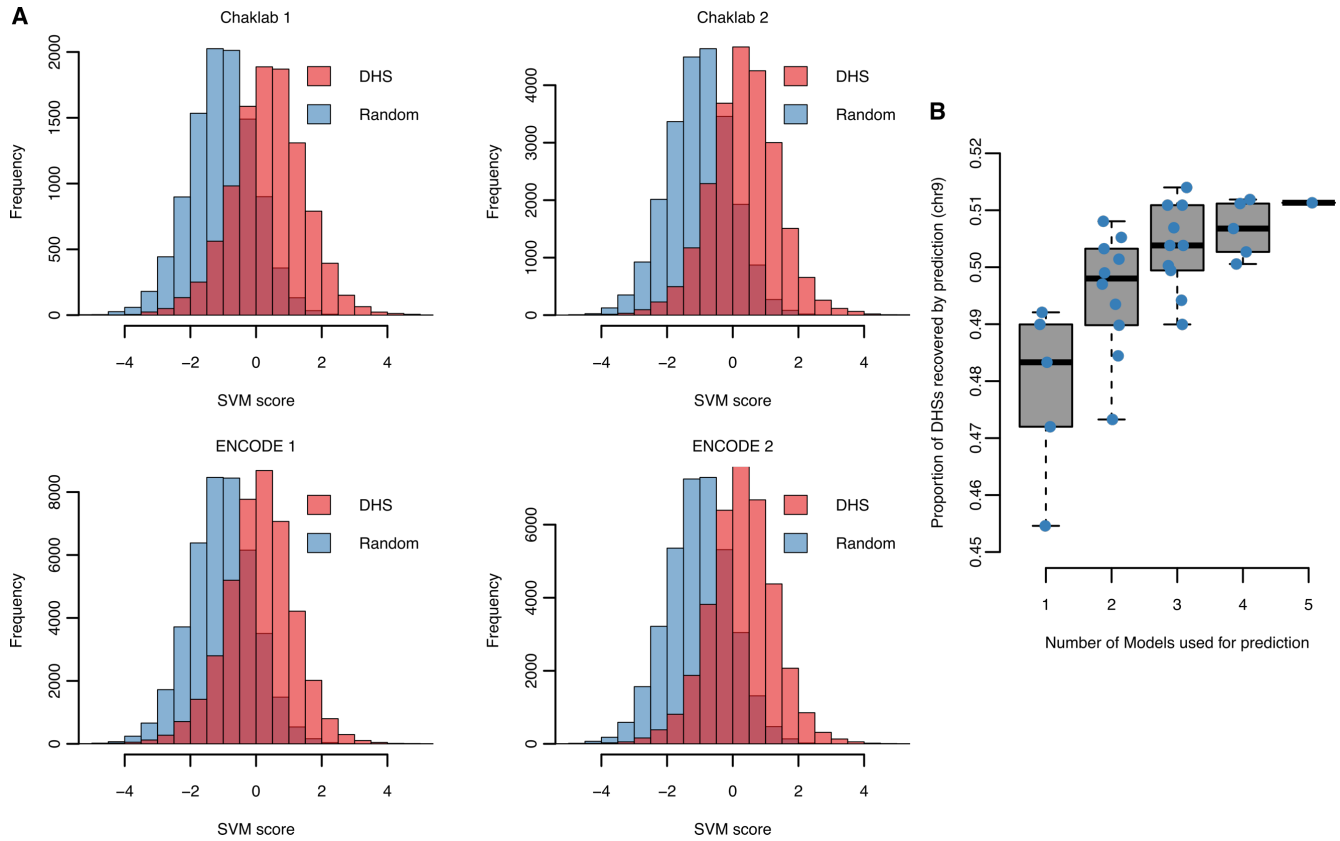

**Supplemental Figure S4. Sequence-based prediction identifies true DHSs missed by experiments.** (A) Comparisons of SVM score distributions between DHSs and random genomic regions, with SVM trained on the Roadmap data set. (B) Box plots of the number of sequence model predicted DHSs as a function of the number of samples used for training and prediction.

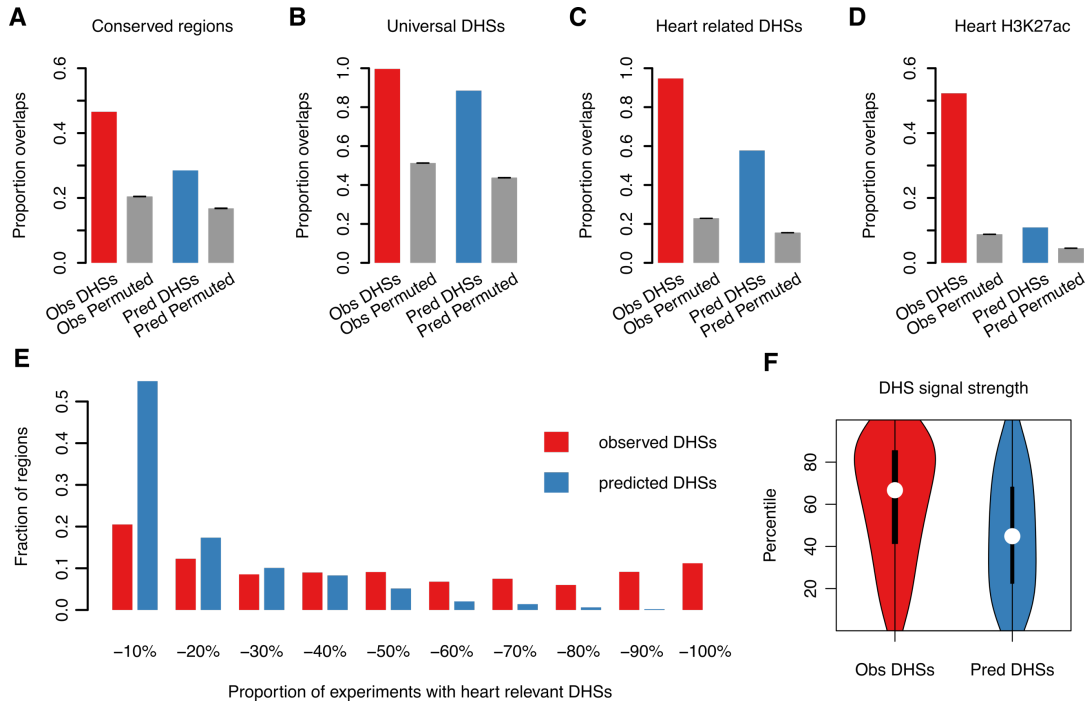

**Supplemental Figure S5. Predicted DHSs are enriched for functional genomic annotations but with lower detection rates.** The overlap of observed DHSs and predicted DHSs with **(A)** genome conserved elements (GERP++ elements were used for identifying conserved regions; average overlap of 100 randomly permuted regions for each set were used as negative controls); **(B)** universal DHSs; **(C)** heart related DHSs; **(D)** H3K27ac histone modification marks in heart tissues; **(E)** proportion of heart related samples with DHSs among all observed and predicted DHSs; **(F)** violin plots of DHS signal strength in heart-related tissues and cell-types for 5,000 randomly selected observed and predicted DHSs.

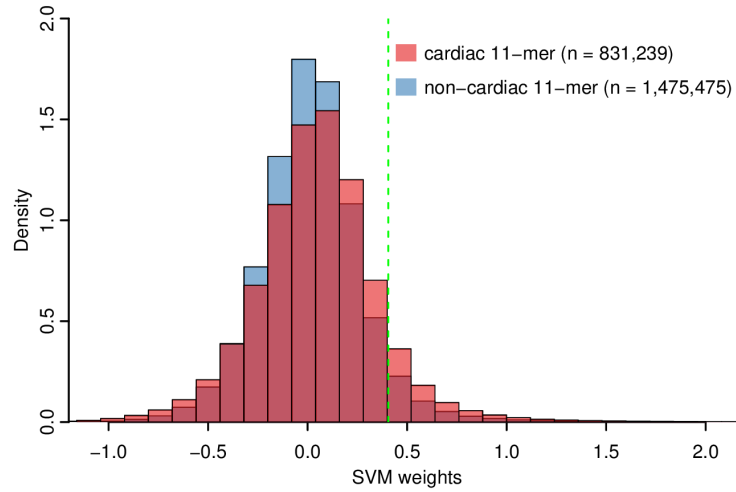

**Supplemental Figure S6. 11-mers matching cardiac TF PWMs have larger SVM weights.**

Two classes of 11-mers were defined based on their matches to predicted cardiac TF PWMs (cardiac 11-mer) and non-cardiac TF PWMs (non-cardiac 11-mer). Distributions of SVM weights for these two sets of 11-mers are shown.

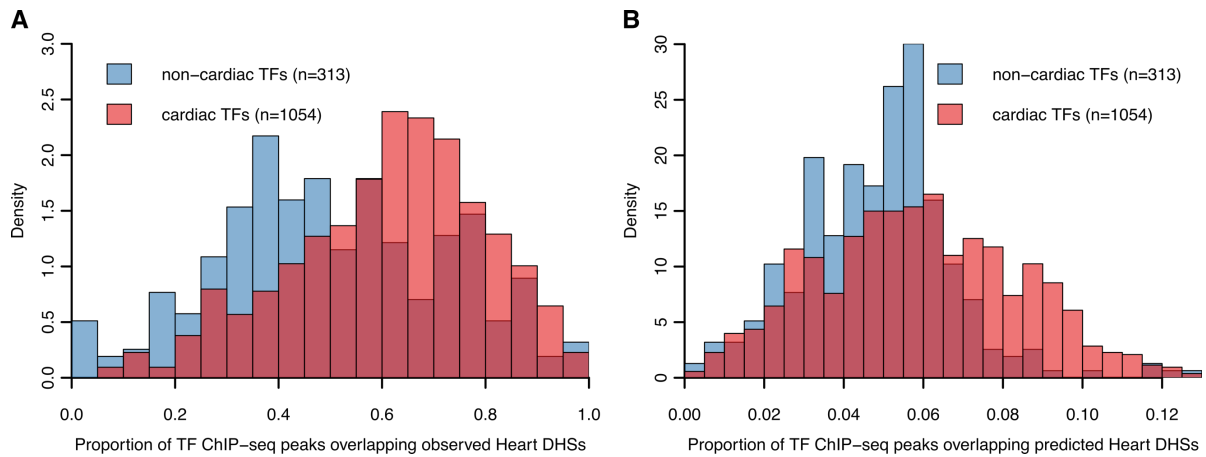

**Supplemental Figure S7. Cardiac TF bound genomic regions are more enriched in heart DHSs.** Proportions of TF ChIP-seq peaks that overlap **(A)** observed and **(B)** predicted heart DHSs are compared between the potential cardiac TFs and non-cardiac TFs. Regions bound by the predicted cardiac TFs exceed the overlap with heart DHSs compared to non-cardiac TFs ( $P < 2.2 \times 10^{-16}$  for observed heart DHSs and  $P < 2.84 \times 10^{-16}$  for predicted heart DHSs). P-values were calculated using one-tailed two sample Kolmogorov-Smirnov tests.

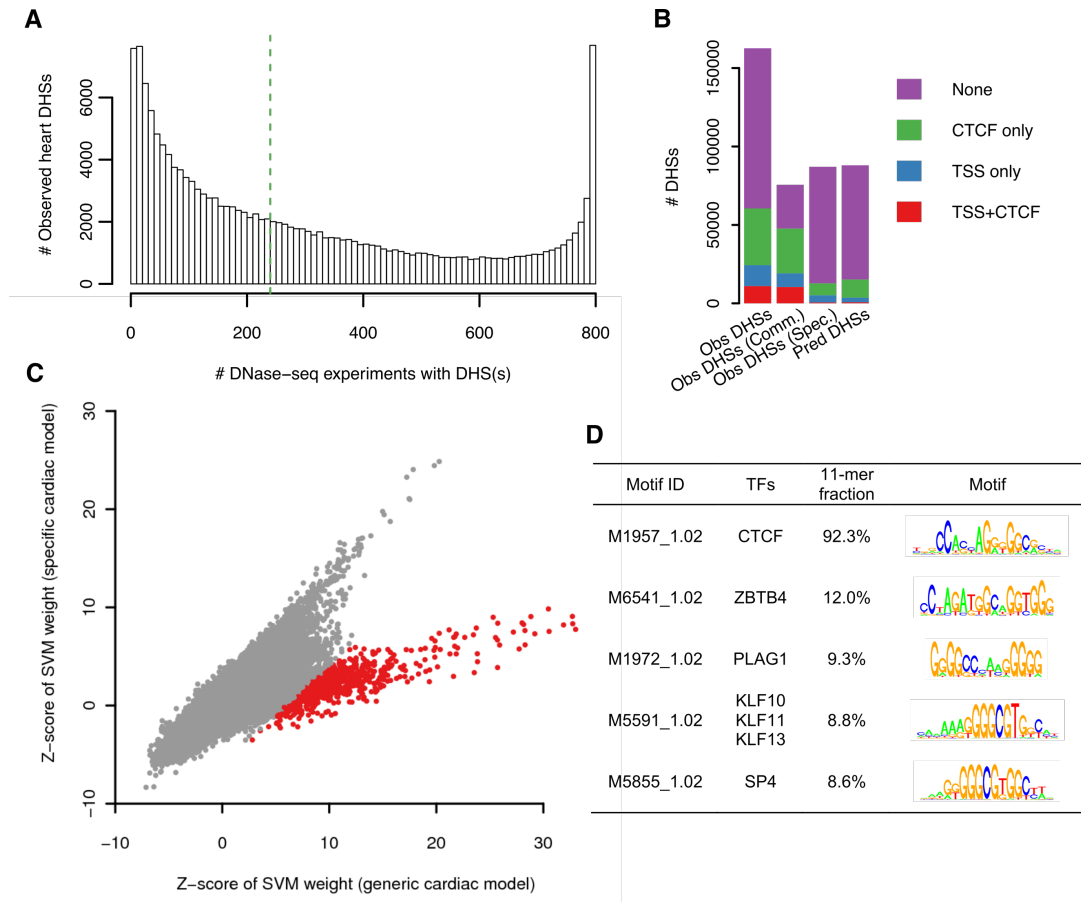

**Supplemental Figure S8. Common DHSs are mostly CTCF bound regions and gene promoters.** **(A)** Distribution of numbers of tissue samples in which cardiac DHSs are in open chromatin; the green dashed line is at 30% of the samples. **(B)** Classification of cardiac DHSs by overlapping CTCF-bound regions and/or transcription start sites (TSS). **(C)** Comparison of SVM weights between the generic and the specific cardiac model. The SVM weights were normalized to Z-scores with 11-mers with significantly reduced weights in the specific models (Z-score difference > 6) highlighted as red. **(D)** Table showing the top 5 TF motifs that are expressed in heart tissues as well as enriched in the highlighted *k*-mers in (C).



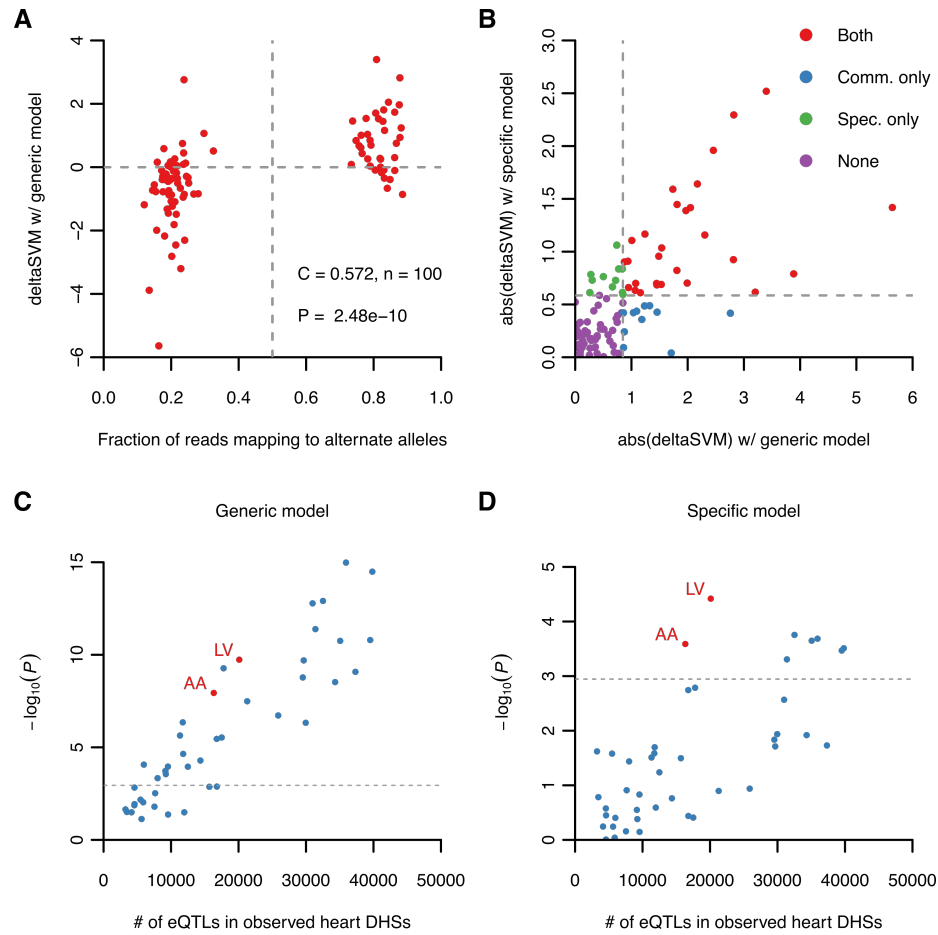

**Supplemental Figure S9. Generic cardiac model predicts distinct regulatory variants, while deltaSVM variants restricted to observed DHSs only miss causal eQTLs. (A)**

deltaSVM scores calculated using the generic cardiac model are highly correlated with allele-biased chromatin accessibility; **(B)** 30% of deltaSVM variants predicted by the generic cardiac model are not predicted by the specific cardiac model. The dashed lines indicate the deltaSVM score cut-off for classifying candidate regulatory variants. **(C)** deltaSVM variants from the generic and **(D)** specific models are compared to GTEx eQTLs restricted to observed DHSs only. The two heart tissues (AA: Atrial Appendages, LV: Left Ventricles) are highlighted in red, and the dashed lines indicate a Bonferroni corrected  $P < 0.05$ .

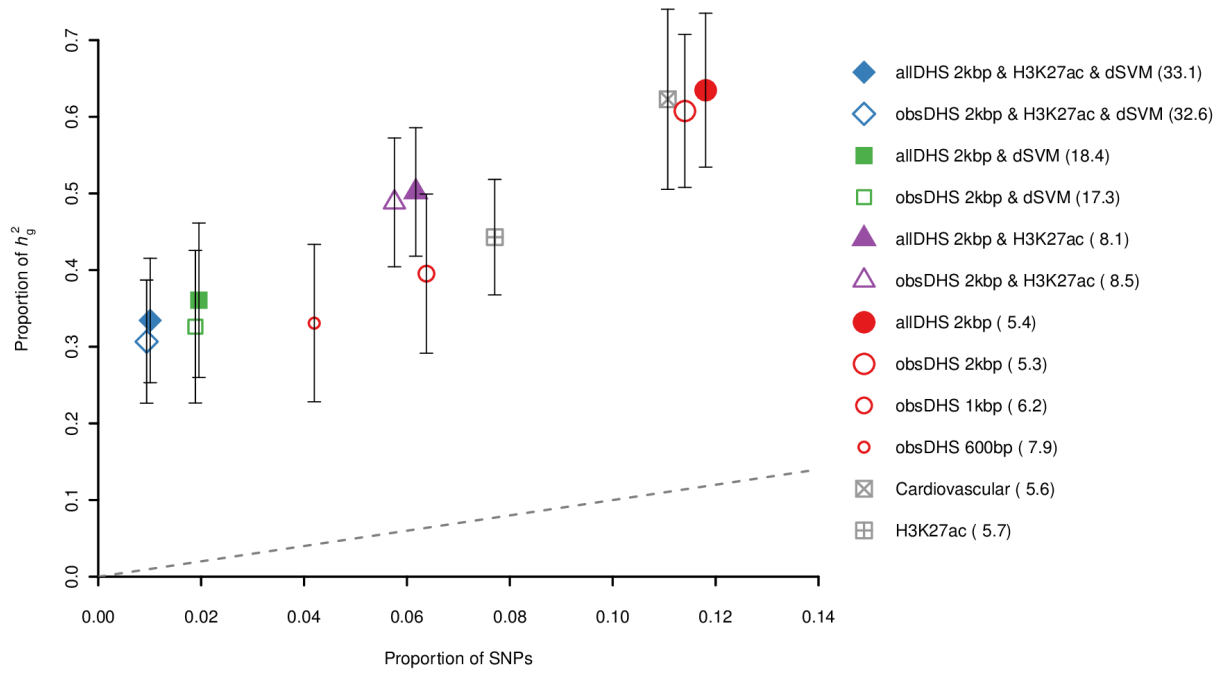

**Supplemental Figure S10. Putative cardiac regulatory variants impact QT trait variation significantly.** The proportion of QT interval heritability explained by SNPs ( $h_g^2$ ) within various DHS-based cardiac CRE annotations, with fold enrichment indicated in parenthesis; error bars denote standard errors estimated by a block Jackknife method; the dashed line indicates no enrichment.

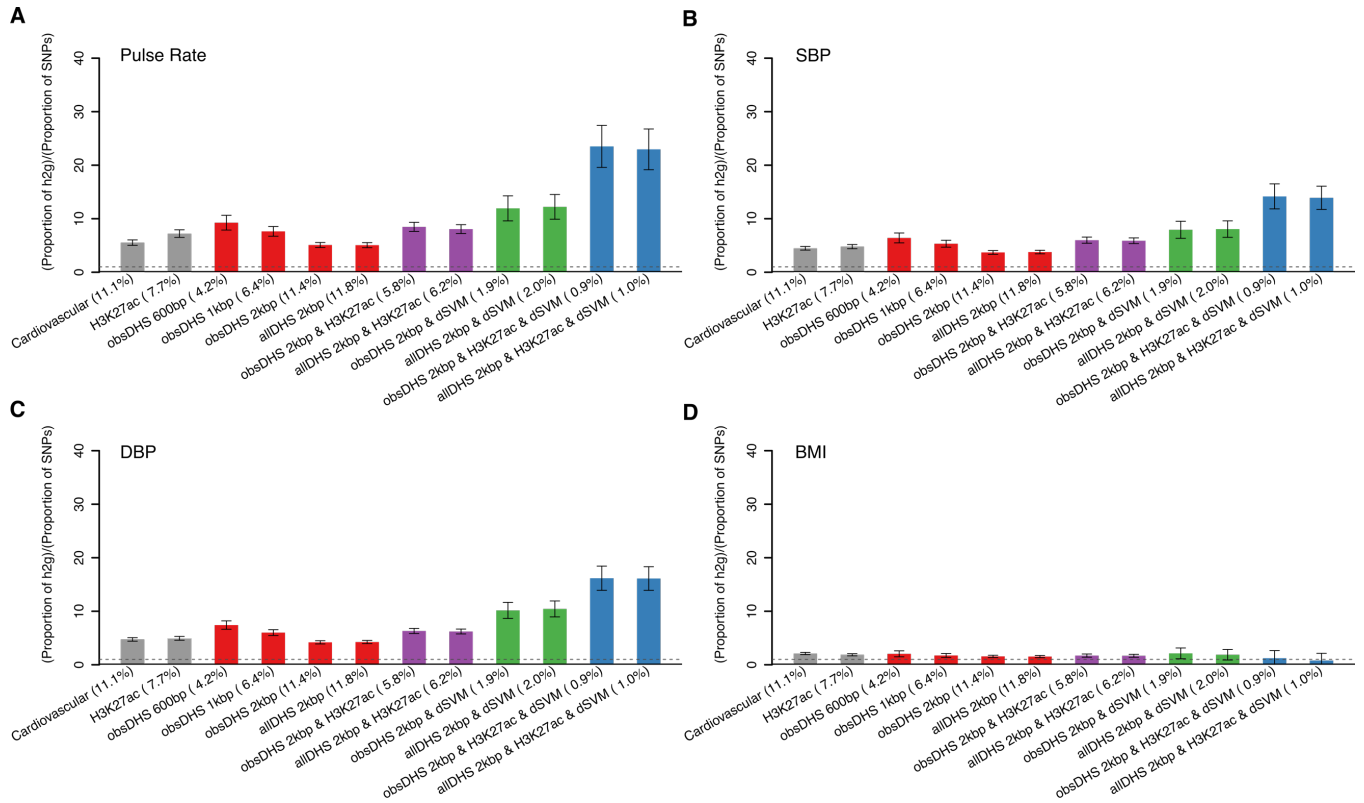

**Supplemental Figure S11. Putative cardiac regulatory variants significantly impact multiple cardiac phenotypes.** Enrichment of SNP heritability was estimated for various cardiac functional annotations for three different cardiac phenotypes and one non-cardiac phenotype from the UK Biobank data set; **(A)** pulse rate; **(B)** systolic blood pressure; **(C)** diastolic blood pressure; **(D)** BMI.

**Supplemental Table S1. Comparisons of predicted DHSs and potential factors affecting CRE detection.**

| <b>DHS</b>      | <b>Number of regions</b> | <b>Prop. of ambiguous bases (24bp)</b> | <b>Prop. of ambiguous bases (36bp)</b> | <b>Prop. of overlap with H3K9me3</b> | <b>Rare SNP Frequency (MAF &lt; 1%)</b> | <b>Common SNP Frequency (MAF &gt; 1%)</b> | <b>Prop. of FANTOM5 Enhancers</b> |
|-----------------|--------------------------|----------------------------------------|----------------------------------------|--------------------------------------|-----------------------------------------|-------------------------------------------|-----------------------------------|
| <b>Observed</b> | 162,435                  | 0.312                                  | 0.100                                  | 0.026                                | 0.00702                                 | 0.00332                                   | 0.112                             |
| <b>Tier 1</b>   | 7,463                    | 0.287                                  | 0.059                                  | 0.025                                | 0.00683                                 | 0.00312                                   | 0.123                             |
| <b>Tier 2</b>   | 43,329                   | 0.360                                  | 0.112                                  | 0.069                                | 0.00703                                 | 0.00342                                   | 0.059                             |
| <b>Tier 3</b>   | 27,081                   | 0.409                                  | 0.160                                  | 0.104                                | 0.00734                                 | 0.00361                                   | 0.027                             |
| <b>Tier 4</b>   | 10,153                   | 0.602                                  | 0.366                                  | 0.154                                | 0.00640                                 | 0.00307                                   | 0.005                             |

**Supplemental Table S2. Comparisons of predicted DHSs and DHSs observed at lower stringency.**

| <b>DHS</b>    | <b>Number<br/>of regions</b> | <b>Prop. overlap<br/>with DHSs<br/>of FDR&lt;0.1</b> | <b>Prop. overlap<br/>with DHSs<br/>of FDR&lt;0.15</b> | <b>Prop. overlap<br/>with DHSs<br/>of FDR&lt;0.2</b> | <b>Prop. overlap<br/>with DHSs<br/>of FDR&lt;0.25</b> |
|---------------|------------------------------|------------------------------------------------------|-------------------------------------------------------|------------------------------------------------------|-------------------------------------------------------|
| <b>Tier 1</b> | 7,463                        | 0.139                                                | 0.191                                                 | 0.275                                                | 0.345                                                 |
| <b>Tier 2</b> | 43,329                       | 0.067                                                | 0.087                                                 | 0.145                                                | 0.200                                                 |
| <b>Tier 3</b> | 27,081                       | 0.014                                                | 0.021                                                 | 0.042                                                | 0.062                                                 |
| <b>Tier 4</b> | 10,153                       | 0.003                                                | 0.004                                                 | 0.010                                                | 0.017                                                 |

**Supplemental Table S3. Comparisons of QT-interval heritability enrichment using various classes of DHS predictions.**

| <b>DHS</b>                     | <b>Prop. SNP</b> | <b>Prop. h<sup>2</sup></b> | <b>Prop. h<sup>2</sup> SE</b> | <b>Enrichment</b> | <b>Enrichment SE</b> | <b>P-value</b>          |
|--------------------------------|------------------|----------------------------|-------------------------------|-------------------|----------------------|-------------------------|
| <b>Observed</b>                | 0.114            | 0.608                      | 0.100                         | 5.329             | 0.876                | $4.749 \times 10^{-06}$ |
| <b>Observed + Tier 1</b>       | 0.118            | 0.635                      | 0.100                         | 5.376             | 0.850                | $1.774 \times 10^{-06}$ |
| <b>Observed + Tier 1/2</b>     | 0.148            | 0.564                      | 0.112                         | 3.807             | 0.756                | $2.602 \times 10^{-04}$ |
| <b>Observed + Tier 1/2/3/4</b> | 0.173            | 0.558                      | 0.117                         | 3.232             | 0.678                | $9.528 \times 10^{-04}$ |

**Supplemental Table S4. 149 predicted QT-interval regulatory variants.**

| regulatory SNP |     |           |       |                         |         |                |        |  | Index SNP  |           |       |                         |          |
|----------------|-----|-----------|-------|-------------------------|---------|----------------|--------|--|------------|-----------|-------|-------------------------|----------|
| rsID           | Chr | Position  | Freq. | GWAS P-value            | Obs DHS | R <sup>2</sup> | D'     |  | rsID       | Position  | Freq. | GWAS P-value            | Locus    |
| rs11583631     | 1   | 6147298   | 0.142 | NA                      | 1       | 0.976          | 0.992  |  | rs2273042  | 6149122   | 0.141 | $1.48 \times 10^{-68}$  | RNF207   |
| rs11584419     | 1   | 6147341   | 0.143 | NA                      | 1       | 0.984          | 1.000  |  | rs2273042  | 6149122   | 0.141 | $1.48 \times 10^{-68}$  | RNF207   |
| rs12069441     | 1   | 6264775   | 0.272 | NA                      | 1       | 0.148          | 0.397  |  | rs846111   | 6279370   | 0.260 | $2.30 \times 10^{-37}$  | RNF207   |
| rs4522020      | 1   | 6319604   | 0.701 | NA                      | 1       | 0.484          | -0.766 |  | rs846111   | 6279370   | 0.260 | $2.30 \times 10^{-37}$  | RNF207   |
| rs7511979      | 1   | 23747425  | 0.861 | NA                      | 1       | 0.070          | 0.677  |  | rs2298632  | 23710475  | 0.487 | $6.76 \times 10^{-45}$  | TCEA3    |
| rs10918444     | 1   | 161979533 | 0.176 | NA                      | 1       | 0.474          | -0.937 |  | rs6669543  | 161981025 | 0.717 | $1.57 \times 10^{-38}$  | NOS1AP   |
| rs7532680      | 1   | 161988206 | 0.213 | $5.19 \times 10^{-35}$  | 1       | 0.400          | -0.765 |  | rs6669543  | 161981025 | 0.717 | $1.57 \times 10^{-38}$  | NOS1AP   |
| rs6427645      | 1   | 161989418 | 0.906 | NA                      | 1       | 0.264          | 1.000  |  | rs6669543  | 161981025 | 0.717 | $1.57 \times 10^{-38}$  | NOS1AP   |
| rs60340472     | 1   | 162006751 | 0.042 | NA                      | 1       | 0.142          | 0.699  |  | rs16857031 | 162112910 | 0.130 | $2.41 \times 10^{-60}$  | NOS1AP   |
| rs12143842     | 1   | 162033890 | 0.258 | $8.97 \times 10^{-210}$ | 1       | 1.000          | 1.000  |  | rs12143842 | 162033890 | 0.258 | $8.97 \times 10^{-210}$ | NOS1AP   |
| rs12084981     | 1   | 162034982 | 0.298 | NA                      | 1       | 0.482          | 0.769  |  | rs12143842 | 162033890 | 0.258 | $8.97 \times 10^{-210}$ | NOS1AP   |
| rs12093845     | 1   | 162101829 | 0.083 | NA                      | 1       | 0.552          | 0.958  |  | rs16857031 | 162112910 | 0.130 | $2.41 \times 10^{-60}$  | NOS1AP   |
| rs4657150      | 1   | 162102064 | 0.626 | NA                      | 1       | 0.416          | -0.846 |  | rs12143842 | 162033890 | 0.258 | $8.97 \times 10^{-210}$ | NOS1AP   |
| rs6704253      | 1   | 162102117 | 0.086 | NA                      | 1       | 0.528          | 0.920  |  | rs16857031 | 162112910 | 0.130 | $2.41 \times 10^{-60}$  | NOS1AP   |
| rs66839222     | 1   | 162103614 | 0.083 | NA                      | 1       | 0.552          | 0.958  |  | rs16857031 | 162112910 | 0.130 | $2.41 \times 10^{-60}$  | NOS1AP   |
| rs4427385      | 1   | 162103916 | 0.083 | NA                      | 1       | 0.552          | 0.958  |  | rs16857031 | 162112910 | 0.130 | $2.41 \times 10^{-60}$  | NOS1AP   |
| rs4480334      | 1   | 162104081 | 0.083 | NA                      | 1       | 0.552          | 0.958  |  | rs16857031 | 162112910 | 0.130 | $2.41 \times 10^{-60}$  | NOS1AP   |
| rs10918758     | 1   | 162116987 | 0.628 | NA                      | 1       | 0.339          | -0.760 |  | rs12143842 | 162033890 | 0.258 | $8.97 \times 10^{-210}$ | NOS1AP   |
| rs4445433      | 1   | 162148796 | 0.369 | NA                      | 1       | 0.259          | -1.000 |  | rs4657172  | 162179632 | 0.869 | $9.21 \times 10^{-99}$  | NOS1AP   |
| rs10918846     | 1   | 162162523 | 0.388 | $1.31 \times 10^{-53}$  | 1       | 0.239          | -1.000 |  | rs4657172  | 162179632 | 0.869 | $9.21 \times 10^{-99}$  | NOS1AP   |
| rs6692381      | 1   | 162167884 | 0.257 | NA                      | 1       | 0.985          | 1.000  |  | rs3934467  | 162182677 | 0.259 | $4.76 \times 10^{-129}$ | NOS1AP   |
| rs17457880     | 1   | 162168154 | 0.026 | NA                      | 1       | 1.000          | 1.000  |  | rs17457880 | 162168154 | 0.026 | $2.33 \times 10^{-10}$  | NOS1AP   |
| rs12123267     | 1   | 162199351 | 0.259 | NA                      | 1       | 0.990          | 0.995  |  | rs3934467  | 162182677 | 0.259 | $4.76 \times 10^{-129}$ | NOS1AP   |
| rs4424487      | 1   | 162199362 | 0.583 | NA                      | 1       | 0.482          | -0.993 |  | rs3934467  | 162182677 | 0.259 | $4.76 \times 10^{-129}$ | NOS1AP   |
| rs12125138     | 1   | 162200616 | 0.055 | NA                      | 1       | 0.165          | 1.000  |  | rs3934467  | 162182677 | 0.259 | $4.76 \times 10^{-129}$ | NOS1AP   |
| rs10918930     | 1   | 162200743 | 0.109 | NA                      | 1       | 0.667          | -0.906 |  | rs4657172  | 162179632 | 0.869 | $9.21 \times 10^{-99}$  | NOS1AP   |
| rs4657178      | 1   | 162210610 | 0.288 | NA                      | 0       | 0.757          | 0.935  |  | rs3934467  | 162182677 | 0.259 | $4.76 \times 10^{-129}$ | NOS1AP   |
| rs10753784     | 1   | 162248920 | 0.454 | $2.18 \times 10^{-31}$  | 1       | 0.262          | 0.789  |  | rs3934467  | 162182677 | 0.259 | $4.76 \times 10^{-129}$ | NOS1AP   |
| rs12030361     | 1   | 162253826 | 0.261 | NA                      | 1       | 0.421          | 0.652  |  | rs3934467  | 162182677 | 0.259 | $4.76 \times 10^{-129}$ | NOS1AP   |
| rs12028141     | 1   | 162253908 | 0.261 | NA                      | 1       | 0.421          | 0.652  |  | rs3934467  | 162182677 | 0.259 | $4.76 \times 10^{-129}$ | NOS1AP   |
| rs10919067     | 1   | 162254743 | 0.261 | NA                      | 1       | 0.421          | 0.652  |  | rs3934467  | 162182677 | 0.259 | $4.76 \times 10^{-129}$ | NOS1AP   |
| rs347313       | 1   | 162304276 | 0.556 | NA                      | 1       | 0.199          | 1.000  |  | rs347272   | 162318498 | 0.863 | $1.77 \times 10^{-37}$  | NOS1AP   |
| rs5778266      | 1   | 162304825 | 0.555 | NA                      | 1       | 0.198          | 1.000  |  | rs347272   | 162318498 | 0.863 | $1.77 \times 10^{-37}$  | NOS1AP   |
| rs1577628      | 1   | 162319524 | 0.094 | $2.96 \times 10^{-34}$  | 1       | 0.640          | -0.988 |  | rs347272   | 162318498 | 0.863 | $1.77 \times 10^{-37}$  | NOS1AP   |
| rs79011457     | 1   | 169072992 | 0.130 | NA                      | 1       | 0.922          | 0.973  |  | rs12061601 | 169070450 | 0.127 | $3.66 \times 10^{-20}$  | ATP1B1   |
| rs12079856     | 1   | 169073002 | 0.132 | NA                      | 1       | 0.957          | 1.000  |  | rs12061601 | 169070450 | 0.127 | $3.66 \times 10^{-20}$  | ATP1B1   |
| rs7527703      | 1   | 169338046 | 0.368 | NA                      | 1       | 0.308          | -0.942 |  | rs1983546  | 169446183 | 0.374 | $6.15 \times 10^{-16}$  | ATP1B1   |
| rs67014132     | 2   | 40740353  | 0.041 | NA                      | 1       | 1.000          | 1.000  |  | rs12997023 | 40752982  | 0.041 | $5.35 \times 10^{-14}$  | SLC8A1   |
| rs1473805      | 3   | 38577679  | 0.263 | NA                      | 1       | 0.588          | 0.953  |  | rs6793245  | 38599037  | 0.356 | $2.42 \times 10^{-26}$  | SCN5A    |
| rs4073797      | 3   | 38590850  | 0.361 | NA                      | 1       | 0.776          | 0.891  |  | rs6793245  | 38599037  | 0.356 | $2.42 \times 10^{-26}$  | SCN5A    |
| rs6793245      | 3   | 38599037  | 0.356 | NA                      | 1       | 1.000          | 1.000  |  | rs6793245  | 38599037  | 0.356 | $2.42 \times 10^{-26}$  | SCN5A    |
| rs62245110     | 3   | 38630311  | 0.180 | NA                      | 1       | 0.263          | 0.561  |  | rs11710077 | 38657899  | 0.208 | $9.79 \times 10^{-13}$  | SCN5A    |
| rs11710077     | 3   | 38657899  | 0.208 | $9.79 \times 10^{-13}$  | 1       | 1.000          | 1.000  |  | rs11710077 | 38657899  | 0.208 | $9.79 \times 10^{-13}$  | SCN5A    |
| rs6782237      | 3   | 38696553  | 0.666 | NA                      | 1       | 0.908          | 0.977  |  | rs6599234  | 38715300  | 0.677 | $2.50 \times 10^{-10}$  | SCN5A    |
| rs6801957      | 3   | 38767315  | 0.585 | $3.11 \times 10^{-10}$  | 1       | 1.000          | 1.000  |  | rs6801957  | 38767315  | 0.585 | $3.11 \times 10^{-10}$  | SCN5A    |
| rs7636423      | 3   | 47309134  | 0.600 | NA                      | 1       | 0.876          | -0.945 |  | rs17784882 | 47544003  | 0.395 | $4.66 \times 10^{-68}$  | ELP6     |
| rs1076394      | 3   | 47322781  | 0.399 | NA                      | 1       | 0.943          | 0.979  |  | rs17784882 | 47544003  | 0.395 | $4.66 \times 10^{-68}$  | ELP6     |
| rs8180040      | 3   | 47388947  | 0.399 | $1.80 \times 10^{-67}$  | 1       | 0.951          | 0.983  |  | rs17784882 | 47544003  | 0.395 | $4.66 \times 10^{-68}$  | ELP6     |
| rs7613282      | 3   | 47389409  | 0.399 | NA                      | 1       | 0.951          | 0.983  |  | rs17784882 | 47544003  | 0.395 | $4.66 \times 10^{-68}$  | ELP6     |
| rs807810       | 3   | 47403892  | 0.400 | NA                      | 1       | 0.947          | 0.983  |  | rs17784882 | 47544003  | 0.395 | $4.66 \times 10^{-68}$  | ELP6     |
| rs4858890      | 3   | 47405456  | 0.415 | NA                      | 1       | 0.889          | 0.983  |  | rs17784882 | 47544003  | 0.395 | $4.66 \times 10^{-68}$  | ELP6     |
| rs73081205     | 3   | 47517670  | 0.396 | NA                      | 1       | 0.996          | 1.000  |  | rs17784882 | 47544003  | 0.395 | $4.66 \times 10^{-68}$  | ELP6     |
| rs11708770     | 3   | 47517774  | 0.396 | NA                      | 1       | 0.996          | 1.000  |  | rs17784882 | 47544003  | 0.395 | $4.66 \times 10^{-68}$  | ELP6     |
| rs11716763     | 3   | 47518266  | 0.397 | NA                      | 1       | 0.992          | 1.000  |  | rs17784882 | 47544003  | 0.395 | $4.66 \times 10^{-68}$  | ELP6     |
| rs62260710     | 3   | 47564462  | 0.395 | NA                      | 1       | 1.000          | 1.000  |  | rs17784882 | 47544003  | 0.395 | $4.66 \times 10^{-68}$  | ELP6     |
| rs10516950     | 4   | 95254730  | 0.471 | NA                      | 1       | 0.394          | -0.744 |  | rs3857067  | 95026434  | 0.444 | $1.05 \times 10^{-67}$  | SMARCAD1 |
| rs2905583      | 5   | 137003769 | 0.164 | NA                      | 1       | 0.272          | 0.624  |  | rs10040989 | 137573725 | 0.120 | $2.70 \times 10^{-99}$  | GFR3A    |
| rs10515496     | 5   | 137044526 | 0.163 | NA                      | 1       | 0.301          | 0.654  |  | rs10040989 | 137573725 | 0.120 | $2.70 \times 10^{-99}$  | GFR3A    |
| rs77915370     | 5   | 137370990 | 0.154 | NA                      | 1       | 0.375          | 0.707  |  | rs10040989 | 137573725 | 0.120 | $2.70 \times 10^{-99}$  | GFR3A    |
| rs283080       | 6   | 118606000 | 0.556 | NA                      | 1       | 0.365          | 0.696  |  | rs11153730 | 118667522 | 0.485 | $5.17 \times 10^{-67}$  | PLN      |
| rs445099       | 6   | 118618252 | 0.536 | NA                      | 1       | 0.559          | 0.828  |  | rs11153730 | 118667522 | 0.485 | $5.17 \times 10^{-67}$  | PLN      |
| rs141430267    | 6   | 118639045 | 0.148 | NA                      | 1       | 0.159          | -0.986 |  | rs11153730 | 118667522 | 0.485 | $5.17 \times 10^{-67}$  | PLN      |
| rs7764093      | 6   | 118692304 | 0.656 | $8.21 \times 10^{-24}$  | 1       | 0.442          | 0.946  |  | rs11153730 | 118667522 | 0.485 | $5.17 \times 10^{-67}$  | PLN      |
| rs7453914      | 6   | 118692981 | 0.563 | NA                      | 1       | 0.672          | 0.958  |  | rs11153730 | 118667522 | 0.485 | $5.17 \times 10^{-67}$  | PLN      |
| rs4551203      | 6   | 118693502 | 0.093 | $1.41 \times 10^{-11}$  | 1       | 0.172          | 0.876  |  | rs3902035  | 119000232 | 0.315 | $4.17 \times 10^{-16}$  | PLN      |
| rs72967581     | 6   | 118699329 | 0.093 | NA                      | 1       | 0.172          | 0.876  |  | rs3902035  | 119000232 | 0.315 | $4.17 \times 10^{-16}$  | PLN      |
| rs7758680      | 6   | 118719413 | 0.141 | $3.18 \times 10^{-13}$  | 1       | 0.170          | 0.986  |  | rs11153730 | 118667522 | 0.485 | $5.17 \times 10^{-67}$  | PLN      |
| rs3951041      | 6   | 118722296 | 0.671 | NA                      | 1       | 0.406          | 0.938  |  | rs11153730 | 118667522 | 0.485 | $5.17 \times 10^{-67}$  | PLN      |
| rs4593396      | 6   | 118722514 | 0.135 | NA                      | 1       | 0.166          | 0.699  |  | rs3902035  | 119000232 | 0.315 | $4.17 \times 10^{-16}$  | PLN      |
| rs76372817     | 6   | 118785780 | 0.055 | NA                      | 1       | 0.638          | 0.849  |  | rs12210733 | 118653075 | 0.049 | $2.61 \times 10^{-22}$  | PLN      |
| rs3798420      | 6   | 118786486 | 0.534 | NA                      | 1       | 0.738          | 0.947  |  | rs11153730 | 118667522 | 0.485 | $5.17 \times 10^{-67}$  | PLN      |
| rs11967375     | 6   | 118823975 | 0.457 | NA                      | 1       | 0.835          | 0.966  |  | rs11153730 | 118667522 | 0.485 | $5.17 \times 10^{-67}$  | PLN      |
| rs34479834     | 6   | 118826244 | 0.536 | NA                      | 1       | 0.732          | 0.947  |  | rs11153730 | 118667522 | 0.485 | $5.17 \times 10^{-67}$  | PLN      |
| rs7761717      | 6   | 118848565 | 0.735 | NA                      | 1       | 0.300          | 0.938  |  | rs11153730 | 118667522 | 0.485 | $5.17 \times 10^{-67}$  | PLN      |
| rs11758454     | 6   | 118848799 | 0.455 | NA                      | 1       | 0.821          | 0.962  |  | rs11153730 | 118667522 | 0.485 | $5.17 \times 10^{-67}$  | PLN      |
| rs13192336     | 6   | 118875162 | 0.536 | NA                      | 1       | 0.725          | 0.943  |  | rs11153730 | 118667522 | 0.485 | $5.17 \times 10^{-67}$  | PLN      |
| rs763254       | 6   | 118886615 | 0.458 | $3.70 \times 10^{-61}$  | 1       | 0.831          | 0.962  |  | rs11153730 | 118667522 | 0.485 | $5.17 \times 10^{-67}$  | PLN      |
| rs59671368     | 6   | 118911430 | 0.537 | NA                      | 1       | 0.722          | 0.942  |  | rs11153730 | 118667522 | 0.485 | $5.17 \times 10^{-67}$  | PLN      |
| rs9489455      | 6   | 118919126 | 0.717 | NA                      | 1       | 0.331          | 0.942  |  | rs11153730 | 118667522 | 0.485 | $5.17 \times 10^{-67}$  | PLN      |

|             |    |           |       |                        |    |       |        |            |           |       |                        |         |
|-------------|----|-----------|-------|------------------------|----|-------|--------|------------|-----------|-------|------------------------|---------|
| rs9489457   | 6  | 118920285 | 0.178 | NA                     | 1  | 0.426 | 0.951  | rs3902035  | 119000232 | 0.315 | $4.17 \times 10^{-16}$ | PLN     |
| rs3862828   | 6  | 118940770 | 0.717 | NA                     | 1  | 0.331 | 0.942  | rs11153730 | 118667522 | 0.485 | $5.17 \times 10^{-67}$ | PLN     |
| rs80153509  | 6  | 118967463 | 0.178 | NA                     | 1  | 0.426 | 0.951  | rs3902035  | 119000232 | 0.315 | $4.17 \times 10^{-16}$ | PLN     |
| rs62422236  | 6  | 118972633 | 0.173 | NA                     | 1  | 0.417 | 0.958  | rs3902035  | 119000232 | 0.315 | $4.17 \times 10^{-16}$ | PLN     |
| rs7746210   | 6  | 119027325 | 0.365 | $6.61 \times 10^{-42}$ | 1  | 0.482 | 0.889  | rs11153730 | 118667522 | 0.485 | $5.17 \times 10^{-67}$ | PLN     |
| rs10499088  | 6  | 119027955 | 0.260 | NA                     | 1  | 0.748 | 0.989  | rs3902035  | 119000232 | 0.315 | $4.17 \times 10^{-16}$ | PLN     |
| rs2888675   | 7  | 150542081 | 0.521 | NA                     | 1  | 0.110 | 0.477  | rs3807375  | 150667210 | 0.345 | $1.61 \times 10^{-32}$ | KCNH2   |
| rs877120    | 7  | 150543134 | 0.150 | NA                     | 1  | 0.207 | 0.700  | rs2072413  | 150647969 | 0.294 | $7.53 \times 10^{-49}$ | KCNH2   |
| rs113986050 | 7  | 150557132 | 0.179 | NA                     | 1  | 0.357 | 0.827  | rs2072413  | 150647969 | 0.294 | $7.53 \times 10^{-49}$ | KCNH2   |
| rs2071515   | 7  | 150557471 | 0.269 | NA                     | 1  | 0.123 | 0.420  | rs3807375  | 150667210 | 0.345 | $1.61 \times 10^{-32}$ | KCNH2   |
| rs12179     | 7  | 150557622 | 0.269 | NA                     | 1  | 0.123 | 0.420  | rs3807375  | 150667210 | 0.345 | $1.61 \times 10^{-32}$ | KCNH2   |
| rs1805120   | 7  | 150649531 | 0.213 | NA                     | 1  | 0.470 | 0.957  | rs3807375  | 150667210 | 0.345 | $1.61 \times 10^{-32}$ | KCNH2   |
| rs2269000   | 7  | 150650792 | 0.213 | NA                     | 1  | 0.477 | 0.964  | rs3807375  | 150667210 | 0.345 | $1.61 \times 10^{-32}$ | KCNH2   |
| rs2269001   | 7  | 150651816 | 0.210 | NA                     | 1  | 0.468 | 0.964  | rs3807375  | 150667210 | 0.345 | $1.61 \times 10^{-32}$ | KCNH2   |
| rs4725984   | 7  | 150668514 | 0.599 | $2.94 \times 10^{-23}$ | 1  | 0.369 | -0.769 | rs2072413  | 150647969 | 0.294 | $7.53 \times 10^{-49}$ | KCNH2   |
| rs3778873   | 7  | 150669867 | 0.153 | $3.56 \times 10^{-33}$ | 1  | 0.336 | 0.990  | rs3807375  | 150667210 | 0.345 | $1.61 \times 10^{-32}$ | KCNH2   |
| rs1171808   | 7  | 150675868 | 0.577 | NA                     | 1  | 0.293 | -0.719 | rs2072413  | 150647969 | 0.294 | $7.53 \times 10^{-49}$ | KCNH2   |
| rs6951150   | 7  | 150681914 | 0.577 | NA                     | 1  | 0.293 | -0.719 | rs2072413  | 150647969 | 0.294 | $7.53 \times 10^{-49}$ | KCNH2   |
| rs12703107  | 7  | 150683629 | 0.216 | $4.72 \times 10^{-20}$ | 1  | 0.425 | 0.902  | rs3807375  | 150667210 | 0.345 | $1.61 \times 10^{-32}$ | KCNH2   |
| rs5888424   | 7  | 150685798 | 0.566 | NA                     | 1  | 0.295 | -0.737 | rs2072413  | 150647969 | 0.294 | $7.53 \times 10^{-49}$ | KCNH2   |
| rs7006399   | 8  | 71029421  | 0.119 | $2.53 \times 10^{-07}$ | 12 | 0.963 | 1.000  | rs16936870 | 71189342  | 0.123 | $2.52 \times 10^{-09}$ | NCOA2   |
| rs4738079   | 8  | 71129687  | 0.877 | $1.34 \times 10^{-08}$ | 0  | 1.000 | -1.000 | rs16936870 | 71189342  | 0.123 | $2.52 \times 10^{-09}$ | NCOA2   |
| rs71517442  | 8  | 71315917  | 0.123 | NA                     | 1  | 1.000 | 1.000  | rs16936870 | 71189342  | 0.123 | $2.52 \times 10^{-09}$ | NCOA2   |
| rs7820975   | 8  | 98810194  | 0.469 | NA                     | 1  | 0.455 | 0.715  | rs11779860 | 98850330  | 0.440 | $1.15 \times 10^{-09}$ | LAPTM4B |
| rs4735495   | 8  | 98817263  | 0.455 | $1.62 \times 10^{-08}$ | 1  | 0.895 | 0.975  | rs11779860 | 98850330  | 0.440 | $1.15 \times 10^{-09}$ | LAPTM4B |
| rs13261020  | 8  | 98824239  | 0.461 | NA                     | 1  | 0.873 | 0.975  | rs11779860 | 98850330  | 0.440 | $1.15 \times 10^{-09}$ | LAPTM4B |
| rs34054579  | 8  | 98824633  | 0.461 | NA                     | 1  | 0.873 | 0.975  | rs11779860 | 98850330  | 0.440 | $1.15 \times 10^{-09}$ | LAPTM4B |
| rs142159812 | 8  | 98834639  | 0.461 | NA                     | 1  | 0.873 | 0.975  | rs11779860 | 98850330  | 0.440 | $1.15 \times 10^{-09}$ | LAPTM4B |
| rs2513954   | 8  | 98835358  | 0.496 | NA                     | 1  | 0.699 | -0.950 | rs11779860 | 98850330  | 0.440 | $1.15 \times 10^{-09}$ | LAPTM4B |
| rs2485378   | 10 | 104059139 | 0.405 | NA                     | 1  | 0.996 | 1.000  | rs2485376  | 104050006 | 0.404 | $2.67 \times 10^{-08}$ | GBF1    |
| rs796427    | 10 | 104066117 | 0.404 | $8.61 \times 10^{-08}$ | 1  | 0.992 | 0.996  | rs2485376  | 104050006 | 0.404 | $2.67 \times 10^{-08}$ | GBF1    |
| rs708155    | 11 | 2396995   | 0.826 | $7.30 \times 10^{-08}$ | 1  | 0.113 | 0.666  | rs2301696  | 2426984   | 0.548 | $4.21 \times 10^{-10}$ | KCNQ1   |
| rs800349    | 11 | 2414702   | 0.813 | NA                     | 0  | 0.121 | 0.660  | rs2301696  | 2426984   | 0.548 | $4.21 \times 10^{-10}$ | KCNQ1   |
| rs76503999  | 11 | 2486033   | 0.238 | NA                     | 1  | 0.973 | 0.989  | rs7122937  | 2486550   | 0.237 | $5.26 \times 10^{-54}$ | KCNQ1   |
| rs5028646   | 11 | 2496057   | 0.776 | $1.38 \times 10^{-08}$ | 1  | 0.076 | 0.925  | rs7122937  | 2486550   | 0.237 | $5.26 \times 10^{-54}$ | KCNQ1   |
| rs4246215   | 11 | 61564299  | 0.370 | NA                     | 1  | 0.825 | 0.922  | rs174583   | 61609750  | 0.363 | $1.30 \times 10^{-10}$ | FADS2   |
| rs174561    | 11 | 61582708  | 0.303 | NA                     | 1  | 0.756 | 0.995  | rs174583   | 61609750  | 0.363 | $1.30 \times 10^{-10}$ | FADS2   |
| rs174562    | 11 | 61585144  | 0.345 | NA                     | 1  | 0.916 | 0.995  | rs174583   | 61609750  | 0.363 | $1.30 \times 10^{-10}$ | FADS2   |
| rs6606689   | 12 | 110975675 | 0.796 | $7.38 \times 10^{-08}$ | 1  | 0.424 | -0.955 | rs3026445  | 110723203 | 0.355 | $9.76 \times 10^{-09}$ | ATP2A2  |
| rs1886512   | 13 | 74520186  | 0.376 | $4.26 \times 10^{-08}$ | 1  | 0.975 | 0.996  | rs728926   | 74513122  | 0.372 | $2.04 \times 10^{-08}$ | KLF12   |
| rs762105    | 14 | 102830175 | 0.334 | NA                     | 1  | 0.764 | -0.943 | rs2273905  | 102974999 | 0.631 | $4.74 \times 10^{-11}$ | ANKRD9  |
| rs12590993  | 14 | 102844064 | 0.336 | NA                     | 1  | 0.771 | -0.944 | rs2273905  | 102974999 | 0.631 | $4.74 \times 10^{-11}$ | ANKRD9  |
| rs12448294  | 16 | 11677434  | 0.147 | NA                     | 1  | 0.976 | 0.992  | rs12930096 | 11670758  | 0.148 | $2.88 \times 10^{-12}$ | LITAF   |
| rs8048558   | 16 | 11678332  | 0.147 | NA                     | 1  | 0.976 | 0.992  | rs12930096 | 11670758  | 0.148 | $2.88 \times 10^{-12}$ | LITAF   |
| rs12921437  | 16 | 11680148  | 0.147 | NA                     | 1  | 0.930 | 0.968  | rs12930096 | 11670758  | 0.148 | $2.88 \times 10^{-12}$ | LITAF   |
| rs7198919   | 16 | 11688891  | 0.319 | $1.14 \times 10^{-20}$ | 0  | 0.539 | 0.955  | rs735951   | 11693536  | 0.442 | $3.74 \times 10^{-28}$ | LITAF   |
| rs8063597   | 16 | 11690807  | 0.318 | NA                     | 1  | 0.543 | 0.961  | rs735951   | 11693536  | 0.442 | $3.74 \times 10^{-28}$ | LITAF   |
| rs735951    | 16 | 11693536  | 0.442 | NA                     | 1  | 1.000 | 1.000  | rs735951   | 11693536  | 0.442 | $3.74 \times 10^{-28}$ | LITAF   |
| rs12927069  | 16 | 11697954  | 0.451 | NA                     | 1  | 0.138 | -0.693 | rs12444261 | 11734642  | 0.258 | $1.82 \times 10^{-12}$ | LITAF   |
| rs12933316  | 16 | 11699720  | 0.447 | NA                     | 1  | 0.134 | -0.690 | rs12444261 | 11734642  | 0.258 | $1.82 \times 10^{-12}$ | LITAF   |
| rs4781128   | 16 | 11707571  | 0.446 | $1.71 \times 10^{-12}$ | 1  | 0.137 | -0.698 | rs12444261 | 11734642  | 0.258 | $1.82 \times 10^{-12}$ | LITAF   |
| rs9646268   | 16 | 11727552  | 0.271 | NA                     | 1  | 0.567 | 0.778  | rs12444261 | 11734642  | 0.258 | $1.82 \times 10^{-12}$ | LITAF   |
| rs369202186 | 16 | 11735712  | 0.261 | NA                     | 1  | 0.974 | 0.995  | rs12444261 | 11734642  | 0.258 | $1.82 \times 10^{-12}$ | LITAF   |
| rs368548487 | 16 | 11735713  | 0.261 | NA                     | 1  | 0.974 | 0.995  | rs12444261 | 11734642  | 0.258 | $1.82 \times 10^{-12}$ | LITAF   |
| rs1704528   | 16 | 14388750  | 0.347 | NA                     | 1  | 0.869 | 0.972  | rs246185   | 14395432  | 0.328 | $8.27 \times 10^{-11}$ | MRTFB   |
| rs181766    | 16 | 14394878  | 0.329 | NA                     | 1  | 0.987 | 0.995  | rs246185   | 14395432  | 0.328 | $8.27 \times 10^{-11}$ | MRTFB   |
| rs4784935   | 16 | 58460342  | 0.747 | NA                     | 1  | 0.995 | 1.000  | rs4784934  | 58459926  | 0.748 | $5.11 \times 10^{-09}$ | CNOT1   |
| rs3809596   | 16 | 58549014  | 0.320 | $8.10 \times 10^{-10}$ | 1  | 0.150 | -1.000 | rs246196   | 58574253  | 0.242 | $2.54 \times 10^{-57}$ | CNOT1   |
| rs12596546  | 16 | 58582949  | 0.758 | NA                     | 1  | 1.000 | -1.000 | rs246196   | 58574253  | 0.242 | $2.54 \times 10^{-57}$ | CNOT1   |
| rs7201946   | 16 | 58593522  | 0.437 | NA                     | 1  | 0.248 | -1.000 | rs246196   | 58574253  | 0.242 | $2.54 \times 10^{-57}$ | CNOT1   |
| rs17821573  | 16 | 58611885  | 0.438 | NA                     | 1  | 0.249 | -1.000 | rs246196   | 58574253  | 0.242 | $2.54 \times 10^{-57}$ | CNOT1   |
| rs9921370   | 16 | 58611935  | 0.758 | NA                     | 1  | 0.995 | -1.000 | rs246196   | 58574253  | 0.242 | $2.54 \times 10^{-57}$ | CNOT1   |
| rs9926577   | 16 | 58613431  | 0.758 | NA                     | 1  | 1.000 | -1.000 | rs246196   | 58574253  | 0.242 | $2.54 \times 10^{-57}$ | CNOT1   |
| rs27097     | 16 | 58664065  | 0.758 | $1.20 \times 10^{-53}$ | 1  | 0.968 | -0.984 | rs246196   | 58574253  | 0.242 | $2.54 \times 10^{-57}$ | CNOT1   |
| rs9635769   | 17 | 33288363  | 0.570 | $3.55 \times 10^{-09}$ | 1  | 0.279 | 0.640  | rs1052536  | 33331575  | 0.474 | $2.92 \times 10^{-24}$ | LIG3    |
| rs11650512  | 17 | 33356907  | 0.479 | NA                     | 1  | 0.949 | 0.984  | rs1052536  | 33331575  | 0.474 | $2.92 \times 10^{-24}$ | LIG3    |
| rs797989    | 17 | 33414758  | 0.478 | NA                     | 1  | 0.953 | 0.984  | rs1052536  | 33331575  | 0.474 | $2.92 \times 10^{-24}$ | LIG3    |
| rs9910355   | 17 | 64315205  | 0.530 | $1.13 \times 10^{-13}$ | 1  | 0.972 | 0.992  | rs9892651  | 64303793  | 0.533 | $5.86 \times 10^{-14}$ | PRKCA   |
| rs11653587  | 17 | 68316678  | 0.206 | NA                     | 1  | 0.630 | 1.000  | rs10775360 | 68325868  | 0.291 | $6.32 \times 10^{-13}$ | KCNJ2   |
| rs1605749   | 17 | 68475145  | 0.532 | $2.65 \times 10^{-22}$ | 1  | 0.968 | 0.992  | rs1396515  | 68430993  | 0.536 | $7.40 \times 10^{-25}$ | KCNJ2   |



**Supplemental Table S5. deltaSVM prediction of 14 variants tested by luciferase assays in iPSC-derived cardiomyocytes.**

| rsID              | chr   | start     | end       | dSVM specific | dSVM generic | luciferase p-value |
|-------------------|-------|-----------|-----------|---------------|--------------|--------------------|
| <b>rs10030238</b> | chr4  | 141808804 | 141808805 | <b>-0.60</b>  | -0.68        | <b>9.72E-16</b>    |
| <b>rs10089107</b> | chr8  | 141698450 | 141698451 | -0.45         | 0.10         | 2.90E-01           |
| <b>rs1044503</b>  | chr14 | 102965995 | 102965996 | -0.11         | <b>1.30</b>  | <b>6.07E-10</b>    |
| <b>rs11119843</b> | chr1  | 212248322 | 212248323 | -0.52         | -0.12        | <b>2.68E-03</b>    |
| <b>rs11263841</b> | chr1  | 35309308  | 35309309  | 0.24          | -0.44        | 2.20E-01           |
| <b>rs1275988</b>  | chr2  | 26914363  | 26914364  | 0.10          | 0.06         | <b>1.50E-02</b>    |
| <b>rs1451509</b>  | chr17 | 57443132  | 57443133  | 0.59          | 0.88         | <b>2.00E-03</b>    |
| <b>rs17779853</b> | chr17 | 30065712  | 30065713  | <b>-0.65</b>  | -0.14        | <b>4.33E-03</b>    |
| <b>rs196067</b>   | chr22 | 38853676  | 38853677  | 0.45          | <b>1.13</b>  | <b>1.60E-02</b>    |
| <b>rs2305054</b>  | chr2  | 220506521 | 220506522 | -0.44         | -0.04        | 6.40E-02           |
| <b>rs3734637</b>  | chr6  | 126081318 | 126081319 | 0.24          | 0.34         | <b>1.96E-04</b>    |
| <b>rs4904569</b>  | chr14 | 89875278  | 89875279  | -0.57         | -0.84        | <b>9.04E-08</b>    |
| <b>rs6565060</b>  | chr16 | 82750050  | 82750051  | <b>-1.19</b>  | <b>-1.48</b> | <b>5.00E-03</b>    |
| <b>rs7783216</b>  | chr7  | 103255194 | 103255195 | 0.10          | -0.37        | 3.50E-01           |

\* Statistically significant values are highlighted in red.

**Supplemental Data S1:** Enrichment tests of PWM matched 11-mers in the top 5th percentile of the SVM weight distribution.

**Supplemental Data S2:** Significant deltaSVM SNPs overlapping heart CREs for both generic and specific models

**Supplemental Data S3:** Regional association plots for each of the 34 genome-wide significant loci for the QT interval GWAS meta-analysis, except for the KCNE1 locus that contains a rare missense mutation. For each locus, only the HapMap3 imputed SNPs used for GWAS meta-analysis (top) and those that also overlap heart DHSs (bottom) are shown. Purple circles denote the predicted cardiac regulatory variants that overlap DHSs as well as have significant deltaSVM scores from the specific model. All independent index SNPs are labeled and marked as diamonds, and neighboring SNPs are color-coded with different shapes based on their highest LD with these index SNPs. For LD, we calculated both  $r^2$  (top left) and  $D'$  (top right) for comparison. Dashed lines indicate genome-wide significant P-values.

**Supplemental Data S4:** Position weight matrices from the CISBP database in the MEME format.

**Supplemental Data S5:** Position weight matrices for C2H2 Zinc-finger transcription factors in the MEME format.

**Supplemental Data S6:** Custom scripts for allele-biased DHS analysis, TF gene expression analysis, and DHS heatmap analysis.
